# Supplementary material
Source: publisher figshare collection journal article supplement (https://acs.figshare.com/ndownloader/files/3955678)
Supplement: Supplementary file 1 [file 3955678]

data_publication_text
_publ_contact_author_name        'Robert D. Pike'
_publ_contact_author_address     
;Department of Chemistry
College of William and Mary
P. O. Box 8795
Williamsburg, VA 23187-8795
;

_publ_contact_author_email       rdpike@wm.edu
_publ_contact_author_phone       757-221-2555
_publ_contact_author_fax         757-221-2715
loop_
_publ_author_name
_publ_author_address
'Kylie M. Henline'
;Department of Chemistry
College of William and Mary
P. O. Box 8795
Williamsburg, VA 23187-8795
;
'Charles Wang'
;Department of Chemistry
College of William and Mary
P. O. Box 8795
Williamsburg, VA 23187-8795
;
'Robert D. Pike'
;Department of Chemistry
College of William and Mary
P. O. Box 8795
Williamsburg, VA 23187-8795
;
'John C. Ahern'
;Department of Chemistry
University of Maine
Orono, ME 04469-5706
;
'Bryer Sousa'
;Department of Chemistry
University of Maine
Orono, ME 04469-5706
;
'Howard H. Patterson'
;Department of Chemistry
University of Maine
Orono, ME 04469-5706
;
'Andrew T. Kerr'
;Department of Chemistry
George Washington University
Washington, DC 20052
;
'Christopher L. Cahill'
;Department of Chemistry
George Washington University
Washington, DC 20052
;

_publ_requested_journal        
;
Crystal Growth and Design
;

_publ_section_title            
;
Structure, Dynamics, and Photophysics in the Copper(I) 
Iodide-Tetrahydrothiophene System
; 
  
data_P21onn
 
_audit_creation_method            SHELXL-2013
_chemical_name_systematic
;
 ?
;
_chemical_name_common             ?
_chemical_melting_point           ?
_chemical_formula_moiety          
 'C16 H32 Cu4 I4 S4'
_chemical_formula_sum
 'C16 H32 Cu4 I4 S4' 
_chemical_formula_weight          1114.41

loop_
 _atom_type_symbol
 _atom_type_description
 _atom_type_scat_dispersion_real
 _atom_type_scat_dispersion_imag
 _atom_type_scat_source
 'C'  'C'   0.0181   0.0091
 'International Tables Vol C Tables 4.2.6.8 and 6.1.1.4'
 'H'  'H'   0.0000   0.0000
 'International Tables Vol C Tables 4.2.6.8 and 6.1.1.4'
 'S'  'S'   0.3331   0.5567
 'International Tables Vol C Tables 4.2.6.8 and 6.1.1.4'
 'Cu'  'Cu'  -1.9646   0.5888
 'International Tables Vol C Tables 4.2.6.8 and 6.1.1.4'
 'I'  'I'  -0.3257   6.8362
 'International Tables Vol C Tables 4.2.6.8 and 6.1.1.4'
 
_space_group_crystal_system       monoclinic
_space_group_IT_number            14
_space_group_name_H-M_alt         'P 21/n'
_space_group_name_Hall            '-P 2yn'
 
_shelx_space_group_comment
;
The symmetry employed for this shelxl refinement is uniquely defined
by the following loop, which should always be used as a source of
symmetry information in preference to the above space-group names.
They are only intended as comments.
;
 
loop_
 _space_group_symop_operation_xyz
 'x, y, z'
 '-x+1/2, y+1/2, -z+1/2'
 '-x, -y, -z'
 'x-1/2, -y-1/2, z-1/2'
 
_cell_length_a                    9.5824(2)
_cell_length_b                    34.9161(6)
_cell_length_c                    17.9841(3)
_cell_angle_alpha                 90
_cell_angle_beta                  91.2810(10)
_cell_angle_gamma                 90
_cell_volume                      6015.62(19)
_cell_formula_units_Z             8
_cell_measurement_temperature     250(2)
_cell_measurement_theta_min       2.76
_cell_measurement_theta_max       58.43
 
_exptl_crystal_description        'prism' 
_exptl_crystal_colour             'colorless'
_exptl_crystal_density_meas       ? 
_exptl_crystal_density_method     ?              
_exptl_crystal_density_diffrn     2.461          
_exptl_crystal_F_000              4160
_exptl_transmission_factor_min    ?                                             
_exptl_transmission_factor_max    ?                                             
_exptl_crystal_size_max           0.350
_exptl_crystal_size_mid           0.160
_exptl_crystal_size_min           0.150
_exptl_absorpt_coefficient_mu     38.037
_shelx_estimated_absorpt_T_min    0.026
_shelx_estimated_absorpt_T_max    0.070
_exptl_absorpt_correction_type    'numerical' 
_exptl_absorpt_correction_T_min   0.0100     
_exptl_absorpt_correction_T_max   0.1690
_exptl_absorpt_process_details    'SADABS (Sheldrick, 2004)'
 
_exptl_special_details
;
 ?
;
 
_diffrn_ambient_temperature       250(2)
_diffrn_radiation_wavelength      1.54178
_diffrn_radiation_type            CuK\a
_diffrn_radiation_source          'fine-focus sealed tube' 
_diffrn_radiation_monochromator   graphite                      
_diffrn_measurement_device_type   'Bruker SMART APEX II CCD'  
_diffrn_measurement_method        '\w and \y'
_diffrn_detector_area_resol_mean  ? 
_diffrn_reflns_number             60682
_diffrn_reflns_av_unetI/netI      0.0414
_diffrn_reflns_av_R_equivalents   0.0760
_diffrn_reflns_limit_h_min        -10
_diffrn_reflns_limit_h_max        9
_diffrn_reflns_limit_k_min        -38
_diffrn_reflns_limit_k_max        38
_diffrn_reflns_limit_l_min        -19
_diffrn_reflns_limit_l_max        19
_diffrn_reflns_theta_min          3.529
_diffrn_reflns_theta_max          58.715
_diffrn_reflns_theta_full         67.679
_diffrn_measured_fraction_theta_max   0.989
_diffrn_measured_fraction_theta_full  0.780
_diffrn_reflns_Laue_measured_fraction_max    0.989
_diffrn_reflns_Laue_measured_fraction_full   0.780
_diffrn_reflns_point_group_measured_fraction_max   0.989
_diffrn_reflns_point_group_measured_fraction_full  0.780
_reflns_number_total              8498
_reflns_number_gt                 7632
_reflns_threshold_expression      'I > 2\s(I)'
_reflns_Friedel_coverage          0.000
_reflns_Friedel_fraction_max      .
_reflns_Friedel_fraction_full     .
 
_reflns_special_details
;
 Reflections were merged by SHELXL according to the crystal
 class for the calculation of statistics and refinement.
 
 _reflns_Friedel_fraction is defined as the number of unique
 Friedel pairs measured divided by the number that would be
 possible theoretically, ignoring centric projections and
 systematic absences.
;
 
_computing_data_collection        'APEX2 (Bruker AXS, 2004)'
_computing_cell_refinement        'SAINTPLUS (Bruker AXS, 2004)'
_computing_data_reduction         'SAINTPLUS'
_computing_structure_solution     'SHELXS97 (Sheldrick, 1997)'
_computing_structure_refinement   'SHELXL-2013 (Sheldrick, 2013)'
_computing_molecular_graphics     'SHELXLE (Hubschle, 2011)'
_computing_publication_material   'Mercury 3.1 (CCDC, 2013)'
 
_refine_special_details
;
 ?
;
_refine_ls_structure_factor_coef  Fsqd
_refine_ls_matrix_type            full
_refine_ls_weighting_scheme       calc
_refine_ls_weighting_details
;
 w=1/[\s^2^(Fo^2^)+(0.0441P)^2^+43.5067P]
 where P=(Fo^2^+2Fc^2^)/3
;
_atom_sites_solution_primary      ?
_atom_sites_solution_secondary    ?
_atom_sites_solution_hydrogens    geom
_refine_ls_hydrogen_treatment     constr
_refine_ls_extinction_method      none
_refine_ls_extinction_coef        .
_refine_ls_number_reflns          8498
_refine_ls_number_parameters      577
_refine_ls_number_restraints      36
_refine_ls_R_factor_all           0.0529
_refine_ls_R_factor_gt            0.0476
_refine_ls_wR_factor_ref          0.1182
_refine_ls_wR_factor_gt           0.1142
_refine_ls_goodness_of_fit_ref    1.064
_refine_ls_restrained_S_all       1.062
_refine_ls_shift/su_max           0.001
_refine_ls_shift/su_mean          0.000
 
loop_
 _atom_site_label
 _atom_site_type_symbol
 _atom_site_fract_x
 _atom_site_fract_y
 _atom_site_fract_z
 _atom_site_U_iso_or_equiv
 _atom_site_adp_type
 _atom_site_occupancy
 _atom_site_site_symmetry_order  
 _atom_site_calc_flag
 _atom_site_refinement_flags_posn
 _atom_site_refinement_flags_adp
 _atom_site_refinement_flags_occupancy
 _atom_site_disorder_assembly
 _atom_site_disorder_group
I1 I -0.00004(7) 0.21229(2) 0.61323(3) 0.05701(18) Uani 1 1 d . . . . .
I2 I 0.01607(7) 0.26884(2) 0.39244(3) 0.05905(19) Uani 1 1 d . . . . .
I3 I 0.32938(7) 0.30052(2) 0.56468(4) 0.06167(19) Uani 1 1 d . . . . .
I4 I 0.35072(7) 0.18507(2) 0.46108(4) 0.0645(2) Uani 1 1 d . . . . .
I5 I 0.88789(7) 0.56573(2) 0.34858(4) 0.05698(18) Uani 1 1 d . . . . .
I6 I 0.97771(8) 0.46650(2) 0.20879(4) 0.0672(2) Uani 1 1 d . . . . .
I7 I 0.62356(10) 0.53693(3) 0.14288(4) 0.0879(3) Uani 1 1 d . . . . .
I8 I 0.59271(8) 0.47083(2) 0.35250(6) 0.0897(3) Uani 1 1 d . . . . .
Cu1 Cu 0.08111(16) 0.20566(4) 0.47269(8) 0.0571(4) Uani 1 1 d . . . . .
Cu2 Cu 0.06694(15) 0.27647(4) 0.53716(8) 0.0559(4) Uani 1 1 d . . . . .
Cu3 Cu 0.27931(16) 0.25865(5) 0.44187(8) 0.0635(4) Uani 1 1 d . . . . .
Cu4 Cu 0.26677(16) 0.22586(5) 0.57867(8) 0.0604(4) Uani 1 1 d . . . . .
Cu5 Cu 0.87617(18) 0.53781(5) 0.20991(9) 0.0664(4) Uani 1 1 d . . . . .
Cu6 Cu 0.86333(17) 0.49050(4) 0.33567(8) 0.0625(4) Uani 1 1 d . . . . .
Cu7 Cu 0.64746(15) 0.53880(4) 0.29196(8) 0.0578(4) Uani 1 1 d . . . . .
Cu8 Cu 0.6984(2) 0.47292(5) 0.21410(12) 0.0895(6) Uani 1 1 d . . . . .
S1 S -0.0414(3) 0.15463(8) 0.42587(16) 0.0699(8) Uani 1 1 d D . . . .
S2 S -0.0710(3) 0.32443(7) 0.58378(14) 0.0572(6) Uani 1 1 d . . . . .
S5 S 1.0046(5) 0.58044(10) 0.1414(2) 0.1036(13) Uani 1 1 d . . . . .
S6 S 0.9691(3) 0.45854(7) 0.43340(13) 0.0538(6) Uani 1 1 d . . . . .
S7 S 0.4761(3) 0.58152(9) 0.32341(18) 0.0804(10) Uani 1 1 d . . . . .
C1 C -0.0256(14) 0.1546(4) 0.3277(6) 0.087(4) Uani 1 1 d D . . . .
H1A H 0.0303 0.1765 0.3117 0.105 Uiso 1 1 calc R U . . .
H1B H 0.0196 0.1310 0.3112 0.105 Uiso 1 1 calc R U . . .
C2 C -0.1678(17) 0.1572(6) 0.2966(7) 0.124(6) Uani 1 1 d D . . . .
H2A H -0.1659 0.1718 0.2501 0.149 Uiso 1 1 calc R U . . .
H2B H -0.2011 0.1313 0.2846 0.149 Uiso 1 1 calc R U . . .
C3 C -0.2612(15) 0.1744(5) 0.3441(9) 0.111(5) Uani 1 1 d D . . . .
H3A H -0.3551 0.1642 0.3342 0.134 Uiso 1 1 calc R U . . .
H3B H -0.2635 0.2021 0.3346 0.134 Uiso 1 1 calc R U . . .
C4 C -0.2220(12) 0.1677(5) 0.4212(7) 0.107(6) Uani 1 1 d D . . . .
H4A H -0.2791 0.1470 0.4415 0.128 Uiso 1 1 calc R U . . .
H4B H -0.2374 0.1909 0.4506 0.128 Uiso 1 1 calc R U . . .
C5 C -0.2426(11) 0.3045(4) 0.5986(7) 0.074(3) Uani 1 1 d . . . . .
H5A H -0.3142 0.3199 0.5727 0.089 Uiso 1 1 calc R U . . .
H5B H -0.2478 0.2782 0.5799 0.089 Uiso 1 1 calc R U . . .
C6 C -0.2641(18) 0.3053(6) 0.6804(9) 0.122(7) Uani 1 1 d . . . . .
H6A H -0.3519 0.3186 0.6901 0.146 Uiso 1 1 calc R U . . .
H6B H -0.2733 0.2789 0.6982 0.146 Uiso 1 1 calc R U . . .
C7 C -0.1602(19) 0.3226(7) 0.7197(8) 0.143(8) Uani 1 1 d . . . . .
H7A H -0.1415 0.3076 0.7649 0.172 Uiso 1 1 calc R U . . .
H7B H -0.1936 0.3478 0.7355 0.172 Uiso 1 1 calc R U . . .
C8 C -0.0290(14) 0.3280(4) 0.6819(6) 0.075(3) Uani 1 1 d . . . . .
H8A H 0.0383 0.3081 0.6969 0.090 Uiso 1 1 calc R U . . .
H8B H 0.0111 0.3531 0.6938 0.090 Uiso 1 1 calc R U . . .
S3 S 0.4144(4) 0.27793(10) 0.34446(17) 0.0870(10) Uani 1 1 d . . . . .
C9 C 0.4036(15) 0.3285(4) 0.3370(9) 0.096(4) Uani 1 1 d . . . . .
H9A H 0.3666 0.3362 0.2880 0.115 Uiso 1 1 calc R U . A 1
H9B H 0.3441 0.3392 0.3755 0.115 Uiso 1 1 calc R U . A 1
C10A C 0.556(4) 0.3417(10) 0.348(3) 0.124(12) Uani 0.68(6) 1 d D . P B 1
H10A H 0.5892 0.3506 0.3001 0.149 Uiso 0.68(6) 1 calc R U P B 1
H10B H 0.5562 0.3638 0.3817 0.149 Uiso 0.68(6) 1 calc R U P B 1
C11A C 0.645(3) 0.3174(10) 0.374(3) 0.156(17) Uani 0.68(6) 1 d D . P B 1
H11A H 0.6729 0.3246 0.4249 0.187 Uiso 0.68(6) 1 calc R U P B 1
H11B H 0.7282 0.3176 0.3436 0.187 Uiso 0.68(6) 1 calc R U P B 1
C12A C 0.582(3) 0.2774(7) 0.374(3) 0.17(2) Uani 0.68(6) 1 d D . P B 1
H12A H 0.5880 0.2670 0.4250 0.206 Uiso 0.68(6) 1 calc R U P B 1
H12B H 0.6366 0.2607 0.3422 0.206 Uiso 0.68(6) 1 calc R U P B 1
C10B C 0.509(6) 0.3438(12) 0.379(3) 0.059(13) Uiso 0.32(6) 1 d D . P B 2
H10C H 0.5458 0.3652 0.3500 0.071 Uiso 0.32(6) 1 calc R U P B 2
H10D H 0.4664 0.3549 0.4227 0.071 Uiso 0.32(6) 1 calc R U P B 2
C11B C 0.616(5) 0.3248(13) 0.403(3) 0.083(18) Uiso 0.32(6) 1 d D . P B 2
H11C H 0.6192 0.3261 0.4570 0.099 Uiso 0.32(6) 1 calc R U P B 2
H11D H 0.7002 0.3371 0.3844 0.099 Uiso 0.32(6) 1 calc R U P B 2
C12B C 0.616(7) 0.2832(12) 0.379(3) 0.073(17) Uiso 0.32(6) 1 d D . P B 2
H12C H 0.6390 0.2662 0.4211 0.088 Uiso 0.32(6) 1 calc R U P B 2
H12D H 0.6813 0.2786 0.3388 0.088 Uiso 0.32(6) 1 calc R U P B 2
S4 S 0.3830(4) 0.20773(11) 0.68520(16) 0.0859(10) Uani 1 1 d . . . . .
C13 C 0.5648(15) 0.2097(4) 0.6701(10) 0.111(6) Uani 1 1 d . . . . .
H13A H 0.5824 0.2171 0.6186 0.133 Uiso 1 1 calc R U . C 1
H13B H 0.6089 0.2287 0.7033 0.133 Uiso 1 1 calc R U . C 1
C14A C 0.621(2) 0.1726(8) 0.685(2) 0.114(11) Uani 0.69(5) 1 d D . P D 1
H14A H 0.6925 0.1667 0.6488 0.137 Uiso 0.69(5) 1 calc R U P D 1
H14B H 0.6648 0.1723 0.7347 0.137 Uiso 0.69(5) 1 calc R U P D 1
C15A C 0.527(3) 0.1471(8) 0.682(4) 0.25(4) Uani 0.69(5) 1 d D . P D 1
H15A H 0.5523 0.1269 0.7171 0.295 Uiso 0.69(5) 1 calc R U P D 1
H15B H 0.5277 0.1358 0.6318 0.295 Uiso 0.69(5) 1 calc R U P D 1
C16A C 0.386(2) 0.1587(9) 0.696(2) 0.095(11) Uani 0.69(5) 1 d D . P D 1
H16A H 0.3610 0.1517 0.7467 0.115 Uiso 0.69(5) 1 calc R U P D 1
H16B H 0.3207 0.1465 0.6609 0.115 Uiso 0.69(5) 1 calc R U P D 1
C14B C 0.614(5) 0.1712(14) 0.635(4) 0.091(17) Uiso 0.31(5) 1 d D . P D 2
H14C H 0.6156 0.1745 0.5809 0.109 Uiso 0.31(5) 1 calc R U P D 2
H14D H 0.7107 0.1665 0.6520 0.109 Uiso 0.31(5) 1 calc R U P D 2
C15B C 0.543(5) 0.1416(13) 0.649(3) 0.087(18) Uiso 0.31(5) 1 d D . P D 2
H15C H 0.5853 0.1287 0.6923 0.104 Uiso 0.31(5) 1 calc R U P D 2
H15D H 0.5490 0.1240 0.6066 0.104 Uiso 0.31(5) 1 calc R U P D 2
C16B C 0.398(5) 0.1482(15) 0.663(3) 0.073(17) Uiso 0.31(5) 1 d D . P D 2
H16C H 0.3685 0.1332 0.7063 0.088 Uiso 0.31(5) 1 calc R U P D 2
H16D H 0.3396 0.1411 0.6201 0.088 Uiso 0.31(5) 1 calc R U P D 2
C17 C 1.1813(18) 0.5656(7) 0.1441(9) 0.146(9) Uani 1 1 d . . . . .
H17A H 1.2418 0.5869 0.1596 0.175 Uiso 1 1 calc R U . . .
H17B H 1.1943 0.5446 0.1798 0.175 Uiso 1 1 calc R U . . .
C18 C 1.216(2) 0.5530(9) 0.0702(11) 0.186(13) Uani 1 1 d . . . . .
H18A H 1.2859 0.5705 0.0501 0.223 Uiso 1 1 calc R U . . .
H18B H 1.2593 0.5275 0.0737 0.223 Uiso 1 1 calc R U . . .
C19 C 1.113(2) 0.5513(9) 0.0255(12) 0.185(13) Uani 1 1 d . . . . .
H19A H 1.0950 0.5242 0.0151 0.222 Uiso 1 1 calc R U . . .
H19B H 1.1418 0.5630 -0.0213 0.222 Uiso 1 1 calc R U . . .
C20 C 0.9843(17) 0.5683(7) 0.0448(8) 0.139(8) Uani 1 1 d . . . . .
H20A H 0.9071 0.5502 0.0372 0.166 Uiso 1 1 calc R U . . .
H20B H 0.9658 0.5913 0.0149 0.166 Uiso 1 1 calc R U . . .
C21 C 1.1553(12) 0.4570(3) 0.4219(7) 0.069(3) Uani 1 1 d . . . . .
H21A H 1.1815 0.4721 0.3785 0.083 Uiso 1 1 calc R U . . .
H21B H 1.2036 0.4675 0.4660 0.083 Uiso 1 1 calc R U . . .
C22 C 1.1939(14) 0.4157(4) 0.4114(12) 0.114(6) Uani 1 1 d . . . . .
H22A H 1.2496 0.4134 0.3666 0.137 Uiso 1 1 calc R U . . .
H22B H 1.2528 0.4075 0.4538 0.137 Uiso 1 1 calc R U . . .
C23 C 1.0877(17) 0.3922(4) 0.4053(13) 0.140(8) Uani 1 1 d . . . . .
H23A H 1.1030 0.3714 0.4410 0.168 Uiso 1 1 calc R U . . .
H23B H 1.0891 0.3809 0.3555 0.168 Uiso 1 1 calc R U . . .
C24 C 0.9459(13) 0.4076(3) 0.4166(7) 0.072(3) Uani 1 1 d . . . . .
H24A H 0.9028 0.3953 0.4593 0.087 Uiso 1 1 calc R U . . .
H24B H 0.8864 0.4033 0.3723 0.087 Uiso 1 1 calc R U . . .
C25 C 0.5046(16) 0.5935(4) 0.4235(9) 0.107(5) Uani 1 1 d . . . . .
H25A H 0.5743 0.5765 0.4467 0.129 Uiso 1 1 calc R U . . .
H25B H 0.5357 0.6201 0.4296 0.129 Uiso 1 1 calc R U . . .
C26 C 0.3652(17) 0.5877(4) 0.4564(8) 0.094(4) Uani 1 1 d . . . . .
H26A H 0.3743 0.5849 0.5105 0.112 Uiso 1 1 calc R U . . .
H26B H 0.3046 0.6097 0.4454 0.112 Uiso 1 1 calc R U . . .
C27 C 0.3068(15) 0.5533(5) 0.4237(7) 0.097(5) Uani 1 1 d . . . . .
H27A H 0.2082 0.5512 0.4364 0.117 Uiso 1 1 calc R U . . .
H27B H 0.3561 0.5309 0.4437 0.117 Uiso 1 1 calc R U . . .
C28 C 0.3197(12) 0.5546(5) 0.3433(7) 0.092(4) Uani 1 1 d . . . . .
H28A H 0.2377 0.5671 0.3204 0.110 Uiso 1 1 calc R U . . .
H28B H 0.3266 0.5286 0.3233 0.110 Uiso 1 1 calc R U . . .
S8A S 0.5718(7) 0.41559(19) 0.1886(3) 0.070(3) Uani 0.512(14) 1 d D . P E 1
C29A C 0.570(3) 0.4116(9) 0.0898(11) 0.100(10) Uani 0.512(14) 1 d D . P E 1
H29A H 0.6577 0.4213 0.0693 0.120 Uiso 0.512(14) 1 calc R U P E 1
H29B H 0.5565 0.3850 0.0740 0.120 Uiso 0.512(14) 1 calc R U P E 1
C30A C 0.453(4) 0.4354(18) 0.0673(16) 0.29(6) Uani 0.512(14) 1 d D . P E 1
H30A H 0.4836 0.4622 0.0663 0.354 Uiso 0.512(14) 1 calc R U P E 1
H30B H 0.4236 0.4283 0.0167 0.354 Uiso 0.512(14) 1 calc R U P E 1
C31A C 0.340(3) 0.4322(19) 0.1138(17) 0.13(2) Uani 0.512(14) 1 d D . P E 1
H31A H 0.2817 0.4105 0.0980 0.160 Uiso 0.512(14) 1 calc R U P E 1
H31B H 0.2834 0.4555 0.1105 0.160 Uiso 0.512(14) 1 calc R U P E 1
C32A C 0.388(2) 0.4265(10) 0.1896(13) 0.098(13) Uani 0.512(14) 1 d D . P E 1
H32A H 0.3373 0.4053 0.2123 0.118 Uiso 0.512(14) 1 calc R U P E 1
H32B H 0.3727 0.4497 0.2189 0.118 Uiso 0.512(14) 1 calc R U P E 1
S8B S 0.6234(7) 0.4262(2) 0.1279(5) 0.084(3) Uani 0.488(14) 1 d D . P E 2
C29B C 0.487(4) 0.4436(13) 0.070(3) 0.28(6) Uani 0.488(14) 1 d D . P E 2
H29C H 0.4650 0.4703 0.0827 0.337 Uiso 0.488(14) 1 calc R U P E 2
H29D H 0.5130 0.4426 0.0177 0.337 Uiso 0.488(14) 1 calc R U P E 2
C30B C 0.367(4) 0.4192(19) 0.083(4) 0.20(4) Uani 0.488(14) 1 d D . P E 2
H30C H 0.2811 0.4330 0.0694 0.235 Uiso 0.488(14) 1 calc R U P E 2
H30D H 0.3723 0.3964 0.0511 0.235 Uiso 0.488(14) 1 calc R U P E 2
C31B C 0.364(3) 0.4082(17) 0.157(4) 0.29(6) Uani 0.488(14) 1 d D . P E 2
H31C H 0.3007 0.3864 0.1628 0.351 Uiso 0.488(14) 1 calc R U P E 2
H31D H 0.3307 0.4294 0.1875 0.351 Uiso 0.488(14) 1 calc R U P E 2
C32B C 0.505(4) 0.3975(12) 0.181(2) 0.19(3) Uani 0.488(14) 1 d D . P E 2
H32C H 0.5207 0.3702 0.1716 0.226 Uiso 0.488(14) 1 calc R U P E 2
H32D H 0.5184 0.4024 0.2342 0.226 Uiso 0.488(14) 1 calc R U P E 2
 
loop_
 _atom_site_aniso_label
 _atom_site_aniso_U_11
 _atom_site_aniso_U_22
 _atom_site_aniso_U_33
 _atom_site_aniso_U_23
 _atom_site_aniso_U_13
 _atom_site_aniso_U_12
I1 0.0641(4) 0.0524(4) 0.0554(4) 0.0122(3) 0.0178(3) 0.0018(3)
I2 0.0648(4) 0.0587(4) 0.0527(3) 0.0133(3) -0.0187(3) -0.0082(3)
I3 0.0558(4) 0.0670(4) 0.0623(4) -0.0179(3) 0.0010(3) -0.0189(3)
I4 0.0617(4) 0.0749(5) 0.0569(4) -0.0175(3) 0.0042(3) 0.0155(3)
I5 0.0587(4) 0.0505(4) 0.0618(4) -0.0067(3) 0.0027(3) -0.0053(3)
I6 0.0794(5) 0.0642(4) 0.0582(4) -0.0050(3) 0.0054(3) 0.0258(3)
I7 0.0975(6) 0.1067(7) 0.0584(4) 0.0019(4) -0.0209(4) 0.0349(5)
I8 0.0574(5) 0.0626(5) 0.1491(8) 0.0484(5) -0.0011(5) -0.0075(3)
Cu1 0.0610(9) 0.0551(8) 0.0547(8) -0.0051(6) -0.0091(7) -0.0102(7)
Cu2 0.0539(9) 0.0545(8) 0.0596(8) 0.0001(6) 0.0072(6) 0.0031(6)
Cu3 0.0594(10) 0.0787(10) 0.0528(8) -0.0023(7) 0.0083(7) -0.0154(8)
Cu4 0.0619(10) 0.0732(10) 0.0456(7) -0.0037(7) -0.0108(6) 0.0113(7)
Cu5 0.0753(11) 0.0651(10) 0.0596(9) 0.0086(7) 0.0173(8) 0.0059(8)
Cu6 0.0671(10) 0.0561(9) 0.0641(9) 0.0087(7) -0.0034(7) 0.0112(7)
Cu7 0.0523(9) 0.0564(9) 0.0651(9) 0.0067(7) 0.0112(7) 0.0071(6)
Cu8 0.0787(13) 0.0689(11) 0.1193(16) -0.0269(10) -0.0330(11) 0.0074(9)
S1 0.086(2) 0.0524(15) 0.0701(16) -0.0012(12) -0.0178(14) -0.0177(13)
S2 0.0684(17) 0.0447(13) 0.0586(14) 0.0065(10) 0.0052(12) 0.0070(11)
S5 0.144(4) 0.072(2) 0.098(2) 0.0109(18) 0.065(2) 0.002(2)
S6 0.0593(15) 0.0511(13) 0.0512(13) 0.0030(10) 0.0034(10) 0.0095(11)
S7 0.082(2) 0.0732(18) 0.088(2) 0.0423(16) 0.0435(16) 0.0333(15)
C1 0.091(10) 0.101(10) 0.071(8) -0.041(7) 0.010(7) -0.008(7)
C2 0.117(14) 0.20(2) 0.057(8) -0.002(10) -0.014(8) 0.032(13)
C3 0.069(10) 0.150(15) 0.114(12) -0.023(11) -0.021(8) 0.017(9)
C4 0.064(9) 0.170(15) 0.087(9) -0.034(9) 0.009(7) -0.060(9)
C5 0.045(7) 0.083(8) 0.094(9) -0.015(7) -0.001(6) 0.011(6)
C6 0.108(13) 0.172(17) 0.088(10) -0.056(11) 0.049(9) -0.061(12)
C7 0.116(14) 0.26(3) 0.051(8) 0.013(11) 0.009(8) 0.008(16)
C8 0.095(9) 0.074(8) 0.055(6) -0.018(5) -0.007(6) -0.012(7)
S3 0.104(3) 0.095(2) 0.0633(17) -0.0183(16) 0.0340(16) -0.0366(19)
C9 0.086(10) 0.102(11) 0.098(10) 0.030(8) -0.002(8) 0.023(8)
C10A 0.12(2) 0.11(2) 0.14(3) 0.04(2) 0.01(2) -0.057(18)
C11A 0.061(18) 0.11(3) 0.29(5) -0.04(3) -0.01(2) 0.010(16)
C12A 0.055(18) 0.082(18) 0.38(7) 0.06(2) 0.10(3) 0.022(14)
S4 0.089(2) 0.118(3) 0.0499(15) -0.0004(15) -0.0203(14) 0.0290(19)
C13 0.088(11) 0.100(11) 0.143(14) 0.048(10) -0.040(10) -0.040(9)
C14A 0.074(16) 0.14(2) 0.13(3) 0.027(18) 0.005(13) 0.022(15)
C15A 0.11(3) 0.07(2) 0.56(11) 0.10(4) 0.11(4) 0.032(17)
C16A 0.067(14) 0.10(2) 0.12(3) 0.06(2) 0.000(13) -0.020(11)
C17 0.113(14) 0.25(3) 0.071(10) 0.023(12) -0.013(9) -0.076(15)
C18 0.113(17) 0.34(4) 0.106(15) 0.029(19) 0.023(12) 0.10(2)
C19 0.095(15) 0.34(4) 0.118(16) -0.13(2) 0.027(12) -0.004(18)
C20 0.089(11) 0.27(3) 0.060(8) 0.065(12) -0.005(7) -0.018(13)
C21 0.061(7) 0.060(7) 0.086(8) 0.008(6) -0.007(6) -0.004(5)
C22 0.054(9) 0.077(10) 0.210(19) -0.032(10) 0.012(9) 0.018(7)
C23 0.088(12) 0.049(8) 0.28(3) -0.018(11) 0.055(14) 0.015(8)
C24 0.080(8) 0.048(6) 0.089(8) 0.009(5) 0.007(6) -0.009(5)
C25 0.096(11) 0.086(10) 0.140(13) -0.064(10) 0.004(9) -0.004(8)
C26 0.119(12) 0.081(9) 0.081(9) -0.003(7) 0.028(8) 0.005(8)
C27 0.085(10) 0.134(13) 0.073(8) -0.005(8) 0.029(7) -0.028(9)
C28 0.043(7) 0.151(13) 0.081(8) -0.026(8) 0.006(6) 0.008(7)
S8A 0.090(5) 0.061(4) 0.058(4) 0.003(3) -0.007(3) -0.005(3)
C29A 0.11(2) 0.10(2) 0.09(2) -0.039(19) 0.028(18) -0.031(19)
C30A 0.31(10) 0.48(15) 0.09(4) -0.05(5) -0.16(6) 0.18(9)
C31A 0.06(2) 0.25(7) 0.09(2) 0.00(3) 0.003(19) 0.05(3)
C32A 0.060(19) 0.16(4) 0.077(17) -0.020(18) 0.018(13) -0.06(2)
S8B 0.066(5) 0.093(6) 0.092(7) -0.036(4) -0.001(4) -0.004(3)
C29B 0.64(18) 0.08(3) 0.13(5) 0.07(3) 0.06(7) -0.01(6)
C30B 0.12(4) 0.21(6) 0.24(7) 0.15(6) -0.13(4) -0.11(4)
C31B 0.05(3) 0.14(5) 0.7(2) 0.11(8) 0.05(6) -0.03(3)
C32B 0.32(8) 0.08(3) 0.16(4) 0.01(3) 0.07(5) -0.09(4)
 
_geom_special_details
;
 All esds (except the esd in the dihedral angle between two l.s. planes)
 are estimated using the full covariance matrix.  The cell esds are taken
 into account individually in the estimation of esds in distances, angles
 and torsion angles; correlations between esds in cell parameters are only
 used when they are defined by crystal symmetry.  An approximate (isotropic)
 treatment of cell esds is used for estimating esds involving l.s. planes.
;
 
loop_
 _geom_bond_atom_site_label_1
 _geom_bond_atom_site_label_2
 _geom_bond_distance
 _geom_bond_site_symmetry_2
 _geom_bond_publ_flag
I1 Cu1 2.6709(16) . ?
I1 Cu4 2.6867(17) . ?
I1 Cu2 2.7101(15) . ?
I2 Cu2 2.6505(15) . ?
I2 Cu3 2.6794(17) . ?
I2 Cu1 2.7012(16) . ?
I3 Cu3 2.6829(16) . ?
I3 Cu2 2.6867(16) . ?
I3 Cu4 2.6880(17) . ?
I4 Cu3 2.6791(18) . ?
I4 Cu4 2.6878(16) . ?
I4 Cu1 2.6943(17) . ?
I5 Cu6 2.6469(16) . ?
I5 Cu7 2.6691(17) . ?
I5 Cu5 2.6777(17) . ?
I6 Cu5 2.6735(17) . ?
I6 Cu6 2.6874(17) . ?
I6 Cu8 2.690(2) . ?
I7 Cu8 2.666(2) . ?
I7 Cu5 2.680(2) . ?
I7 Cu7 2.6865(17) . ?
I8 Cu7 2.6681(16) . ?
I8 Cu6 2.7061(18) . ?
I8 Cu8 2.709(3) . ?
Cu1 S1 2.284(3) . ?
Cu1 Cu4 2.6728(19) . ?
Cu1 Cu3 2.717(2) . ?
Cu1 Cu2 2.735(2) . ?
Cu2 S2 2.303(3) . ?
Cu2 Cu4 2.699(2) . ?
Cu2 Cu3 2.761(2) . ?
Cu3 S3 2.302(3) . ?
Cu3 Cu4 2.719(2) . ?
Cu4 S4 2.284(3) . ?
Cu5 S5 2.306(4) . ?
Cu5 Cu7 2.669(2) . ?
Cu5 Cu6 2.806(2) . ?
Cu5 Cu8 2.837(3) . ?
Cu6 S6 2.298(3) . ?
Cu6 Cu8 2.739(2) . ?
Cu6 Cu7 2.769(2) . ?
Cu7 S7 2.298(3) . ?
Cu7 Cu8 2.743(2) . ?
Cu8 S8B 2.351(8) . ?
Cu8 S8A 2.380(7) . ?
S1 C1 1.776(12) . ?
S1 C4 1.790(14) . ?
S2 C8 1.806(11) . ?
S2 C5 1.811(12) . ?
S5 C17 1.77(2) . ?
S5 C20 1.794(16) . ?
S6 C21 1.801(12) . ?
S6 C24 1.816(11) . ?
S7 C28 1.812(14) . ?
S7 C25 1.863(16) . ?
C1 C2 1.464(18) . ?
C1 H1A 0.9800 . ?
C1 H1B 0.9800 . ?
C2 C3 1.39(2) . ?
C2 H2A 0.9800 . ?
C2 H2B 0.9800 . ?
C3 C4 1.448(19) . ?
C3 H3A 0.9800 . ?
C3 H3B 0.9800 . ?
C4 H4A 0.9800 . ?
C4 H4B 0.9800 . ?
C5 C6 1.490(19) . ?
C5 H5A 0.9800 . ?
C5 H5B 0.9800 . ?
C6 C7 1.35(2) . ?
C6 H6A 0.9800 . ?
C6 H6B 0.9800 . ?
C7 C8 1.45(2) . ?
C7 H7A 0.9800 . ?
C7 H7B 0.9800 . ?
C8 H8A 0.9800 . ?
C8 H8B 0.9800 . ?
S3 C12A 1.69(4) . ?
S3 C9 1.773(15) . ?
S3 C12B 2.03(6) . ?
C9 C10B 1.36(5) . ?
C9 C10A 1.54(3) . ?
C9 H9A 0.9800 . ?
C9 H9B 0.9800 . ?
C10A C11A 1.28(3) . ?
C10A H10A 0.9800 . ?
C10A H10B 0.9800 . ?
C11A C12A 1.52(3) . ?
C11A H11A 0.9800 . ?
C11A H11B 0.9800 . ?
C12A H12A 0.9800 . ?
C12A H12B 0.9800 . ?
C10B C11B 1.28(3) . ?
C10B H10C 0.9800 . ?
C10B H10D 0.9800 . ?
C11B C12B 1.51(3) . ?
C11B H11C 0.9800 . ?
C11B H11D 0.9800 . ?
C12B H12C 0.9800 . ?
C12B H12D 0.9800 . ?
S4 C16A 1.72(3) . ?
S4 C13 1.770(16) . ?
S4 C16B 2.12(5) . ?
C13 C14A 1.43(3) . ?
C13 C14B 1.56(6) . ?
C13 H13A 0.9800 . ?
C13 H13B 0.9800 . ?
C14A C15A 1.26(3) . ?
C14A H14A 0.9800 . ?
C14A H14B 0.9800 . ?
C15A C16A 1.43(3) . ?
C15A H15A 0.9800 . ?
C15A H15B 0.9800 . ?
C16A H16A 0.9800 . ?
C16A H16B 0.9800 . ?
C14B C15B 1.27(3) . ?
C14B H14C 0.9800 . ?
C14B H14D 0.9800 . ?
C15B C16B 1.44(3) . ?
C15B H15C 0.9800 . ?
C15B H15D 0.9800 . ?
C16B H16C 0.9800 . ?
C16B H16D 0.9800 . ?
C17 C18 1.45(3) . ?
C17 H17A 0.9800 . ?
C17 H17B 0.9800 . ?
C18 C19 1.26(3) . ?
C18 H18A 0.9800 . ?
C18 H18B 0.9800 . ?
C19 C20 1.42(2) . ?
C19 H19A 0.9800 . ?
C19 H19B 0.9800 . ?
C20 H20A 0.9800 . ?
C20 H20B 0.9800 . ?
C21 C22 1.503(17) . ?
C21 H21A 0.9800 . ?
C21 H21B 0.9800 . ?
C22 C23 1.308(19) . ?
C22 H22A 0.9800 . ?
C22 H22B 0.9800 . ?
C23 C24 1.479(18) . ?
C23 H23A 0.9800 . ?
C23 H23B 0.9800 . ?
C24 H24A 0.9800 . ?
C24 H24B 0.9800 . ?
C25 C26 1.487(19) . ?
C25 H25A 0.9800 . ?
C25 H25B 0.9800 . ?
C26 C27 1.443(19) . ?
C26 H26A 0.9800 . ?
C26 H26B 0.9800 . ?
C27 C28 1.456(18) . ?
C27 H27A 0.9800 . ?
C27 H27B 0.9800 . ?
C28 H28A 0.9800 . ?
C28 H28B 0.9800 . ?
S8A C29A 1.781(19) . ?
S8A C32A 1.80(2) . ?
C29A C30A 1.45(2) . ?
C29A H29A 0.9800 . ?
C29A H29B 0.9800 . ?
C30A C31A 1.39(3) . ?
C30A H30A 0.9800 . ?
C30A H30B 0.9800 . ?
C31A C32A 1.44(3) . ?
C31A H31A 0.9800 . ?
C31A H31B 0.9800 . ?
C32A H32A 0.9800 . ?
C32A H32B 0.9800 . ?
S8B C29B 1.76(2) . ?
S8B C32B 1.81(2) . ?
C29B C30B 1.45(2) . ?
C29B H29C 0.9800 . ?
C29B H29D 0.9800 . ?
C30B C31B 1.39(3) . ?
C30B H30C 0.9800 . ?
C30B H30D 0.9800 . ?
C31B C32B 1.45(3) . ?
C31B H31C 0.9800 . ?
C31B H31D 0.9800 . ?
C32B H32C 0.9800 . ?
C32B H32D 0.9800 . ?
 
loop_
 _geom_angle_atom_site_label_1
 _geom_angle_atom_site_label_2
 _geom_angle_atom_site_label_3
 _geom_angle
 _geom_angle_site_symmetry_1
 _geom_angle_site_symmetry_3
 _geom_angle_publ_flag
Cu1 I1 Cu4 59.85(4) . . ?
Cu1 I1 Cu2 61.10(4) . . ?
Cu4 I1 Cu2 60.00(5) . . ?
Cu2 I2 Cu3 62.39(5) . . ?
Cu2 I2 Cu1 61.47(4) . . ?
Cu3 I2 Cu1 60.67(5) . . ?
Cu3 I3 Cu2 61.88(5) . . ?
Cu3 I3 Cu4 60.82(5) . . ?
Cu2 I3 Cu4 60.28(5) . . ?
Cu3 I4 Cu4 60.87(5) . . ?
Cu3 I4 Cu1 60.76(5) . . ?
Cu4 I4 Cu1 59.55(4) . . ?
Cu6 I5 Cu7 62.79(5) . . ?
Cu6 I5 Cu5 63.59(5) . . ?
Cu7 I5 Cu5 59.90(5) . . ?
Cu5 I6 Cu6 63.12(5) . . ?
Cu5 I6 Cu8 63.87(6) . . ?
Cu6 I6 Cu8 61.24(6) . . ?
Cu8 I7 Cu5 64.09(5) . . ?
Cu8 I7 Cu7 61.64(6) . . ?
Cu5 I7 Cu7 59.66(5) . . ?
Cu7 I8 Cu6 62.03(5) . . ?
Cu7 I8 Cu8 61.33(5) . . ?
Cu6 I8 Cu8 60.76(5) . . ?
S1 Cu1 I1 104.97(10) . . ?
S1 Cu1 Cu4 142.86(10) . . ?
I1 Cu1 Cu4 60.37(5) . . ?
S1 Cu1 I4 104.43(10) . . ?
I1 Cu1 I4 113.36(5) . . ?
Cu4 Cu1 I4 60.10(5) . . ?
S1 Cu1 I2 109.23(9) . . ?
I1 Cu1 I2 111.48(6) . . ?
Cu4 Cu1 I2 107.91(6) . . ?
I4 Cu1 I2 112.75(6) . . ?
S1 Cu1 Cu3 144.26(11) . . ?
I1 Cu1 Cu3 110.71(6) . . ?
Cu4 Cu1 Cu3 60.57(6) . . ?
I4 Cu1 Cu3 59.34(5) . . ?
I2 Cu1 Cu3 59.27(5) . . ?
S1 Cu1 Cu2 146.23(11) . . ?
I1 Cu1 Cu2 60.16(4) . . ?
Cu4 Cu1 Cu2 59.86(5) . . ?
I4 Cu1 Cu2 109.32(6) . . ?
I2 Cu1 Cu2 58.35(4) . . ?
Cu3 Cu1 Cu2 60.83(5) . . ?
S2 Cu2 I2 109.64(8) . . ?
S2 Cu2 I3 104.36(9) . . ?
I2 Cu2 I3 111.30(5) . . ?
S2 Cu2 Cu4 141.71(9) . . ?
I2 Cu2 Cu4 108.64(6) . . ?
I3 Cu2 Cu4 59.88(5) . . ?
S2 Cu2 I1 105.86(8) . . ?
I2 Cu2 I1 111.84(6) . . ?
I3 Cu2 I1 113.37(6) . . ?
Cu4 Cu2 I1 59.57(5) . . ?
S2 Cu2 Cu1 147.77(10) . . ?
I2 Cu2 Cu1 60.18(5) . . ?
I3 Cu2 Cu1 107.79(6) . . ?
Cu4 Cu2 Cu1 58.92(5) . . ?
I1 Cu2 Cu1 58.74(4) . . ?
S2 Cu2 Cu3 145.78(9) . . ?
I2 Cu2 Cu3 59.32(5) . . ?
I3 Cu2 Cu3 58.99(5) . . ?
Cu4 Cu2 Cu3 59.72(6) . . ?
I1 Cu2 Cu3 108.25(6) . . ?
Cu1 Cu2 Cu3 59.27(5) . . ?
S3 Cu3 I4 103.43(12) . . ?
S3 Cu3 I2 104.48(12) . . ?
I4 Cu3 I2 113.95(6) . . ?
S3 Cu3 I3 111.96(10) . . ?
I4 Cu3 I3 112.08(6) . . ?
I2 Cu3 I3 110.52(6) . . ?
S3 Cu3 Cu1 139.62(10) . . ?
I4 Cu3 Cu1 59.90(5) . . ?
I2 Cu3 Cu1 60.06(5) . . ?
I3 Cu3 Cu1 108.42(6) . . ?
S3 Cu3 Cu4 148.08(13) . . ?
I4 Cu3 Cu4 59.72(5) . . ?
I2 Cu3 Cu4 107.20(6) . . ?
I3 Cu3 Cu4 59.68(5) . . ?
Cu1 Cu3 Cu4 58.90(5) . . ?
S3 Cu3 Cu2 147.29(13) . . ?
I4 Cu3 Cu2 109.01(6) . . ?
I2 Cu3 Cu2 58.29(5) . . ?
I3 Cu3 Cu2 59.13(5) . . ?
Cu1 Cu3 Cu2 59.90(5) . . ?
Cu4 Cu3 Cu2 59.01(5) . . ?
S4 Cu4 Cu1 146.04(13) . . ?
S4 Cu4 I1 101.88(11) . . ?
Cu1 Cu4 I1 59.78(5) . . ?
S4 Cu4 I4 111.36(10) . . ?
Cu1 Cu4 I4 60.35(5) . . ?
I1 Cu4 I4 113.05(6) . . ?
S4 Cu4 I3 103.99(12) . . ?
Cu1 Cu4 I3 109.60(6) . . ?
I1 Cu4 I3 114.09(6) . . ?
I4 Cu4 I3 111.64(6) . . ?
S4 Cu4 Cu2 138.02(11) . . ?
Cu1 Cu4 Cu2 61.22(5) . . ?
I1 Cu4 Cu2 60.43(5) . . ?
I4 Cu4 Cu2 110.63(6) . . ?
I3 Cu4 Cu2 59.84(5) . . ?
S4 Cu4 Cu3 147.69(13) . . ?
Cu1 Cu4 Cu3 60.53(5) . . ?
I1 Cu4 Cu3 110.19(6) . . ?
I4 Cu4 Cu3 59.41(5) . . ?
I3 Cu4 Cu3 59.50(5) . . ?
Cu2 Cu4 Cu3 61.27(5) . . ?
S5 Cu5 Cu7 137.86(12) . . ?
S5 Cu5 I6 113.49(11) . . ?
Cu7 Cu5 I6 108.64(6) . . ?
S5 Cu5 I5 104.52(12) . . ?
Cu7 Cu5 I5 59.89(5) . . ?
I6 Cu5 I5 109.78(6) . . ?
S5 Cu5 I7 104.75(14) . . ?
Cu7 Cu5 I7 60.29(5) . . ?
I6 Cu5 I7 108.13(6) . . ?
I5 Cu5 I7 116.22(6) . . ?
S5 Cu5 Cu6 147.61(15) . . ?
Cu7 Cu5 Cu6 60.71(5) . . ?
I6 Cu5 Cu6 58.68(5) . . ?
I5 Cu5 Cu6 57.67(5) . . ?
I7 Cu5 Cu6 107.48(7) . . ?
S5 Cu5 Cu8 149.09(14) . . ?
Cu7 Cu5 Cu8 59.65(6) . . ?
I6 Cu5 Cu8 58.35(5) . . ?
I5 Cu5 Cu8 106.19(7) . . ?
I7 Cu5 Cu8 57.72(6) . . ?
Cu6 Cu5 Cu8 58.07(6) . . ?
S6 Cu6 I5 112.21(9) . . ?
S6 Cu6 I6 108.46(8) . . ?
I5 Cu6 I6 110.29(6) . . ?
S6 Cu6 I8 101.45(9) . . ?
I5 Cu6 I8 109.00(6) . . ?
I6 Cu6 I8 115.21(7) . . ?
S6 Cu6 Cu8 137.60(10) . . ?
I5 Cu6 Cu8 109.94(6) . . ?
I6 Cu6 Cu8 59.42(6) . . ?
I8 Cu6 Cu8 59.67(7) . . ?
S6 Cu6 Cu7 145.76(10) . . ?
I5 Cu6 Cu7 59.00(5) . . ?
I6 Cu6 Cu7 105.37(6) . . ?
I8 Cu6 Cu7 58.31(5) . . ?
Cu8 Cu6 Cu7 59.72(6) . . ?
S6 Cu6 Cu5 151.14(10) . . ?
I5 Cu6 Cu5 58.74(5) . . ?
I6 Cu6 Cu5 58.20(5) . . ?
I8 Cu6 Cu5 107.39(6) . . ?
Cu8 Cu6 Cu5 61.53(7) . . ?
Cu7 Cu6 Cu5 57.21(5) . . ?
S7 Cu7 I8 109.19(9) . . ?
S7 Cu7 I5 107.03(12) . . ?
I8 Cu7 I5 109.48(6) . . ?
S7 Cu7 Cu5 138.10(10) . . ?
I8 Cu7 Cu5 112.67(6) . . ?
I5 Cu7 Cu5 60.21(5) . . ?
S7 Cu7 I7 102.47(10) . . ?
I8 Cu7 I7 111.87(6) . . ?
I5 Cu7 I7 116.29(6) . . ?
Cu5 Cu7 I7 60.05(5) . . ?
S7 Cu7 Cu8 143.74(13) . . ?
I8 Cu7 Cu8 60.07(6) . . ?
I5 Cu7 Cu8 109.16(6) . . ?
Cu5 Cu7 Cu8 63.21(7) . . ?
I7 Cu7 Cu8 58.82(6) . . ?
S7 Cu7 Cu6 149.16(11) . . ?
I8 Cu7 Cu6 59.66(5) . . ?
I5 Cu7 Cu6 58.21(5) . . ?
Cu5 Cu7 Cu6 62.08(6) . . ?
I7 Cu7 Cu6 108.36(6) . . ?
Cu8 Cu7 Cu6 59.59(6) . . ?
S8B Cu8 I7 100.9(2) . . ?
S8A Cu8 I7 118.81(16) . . ?
S8B Cu8 I6 102.03(19) . . ?
S8A Cu8 I6 115.23(18) . . ?
I7 Cu8 I6 108.06(8) . . ?
S8B Cu8 I8 118.2(2) . . ?
S8A Cu8 I8 87.44(17) . . ?
I7 Cu8 I8 111.21(7) . . ?
I6 Cu8 I8 115.03(7) . . ?
S8B Cu8 Cu6 147.6(2) . . ?
S8A Cu8 Cu6 128.69(17) . . ?
I7 Cu8 Cu6 109.87(7) . . ?
I6 Cu8 Cu6 59.34(5) . . ?
I8 Cu8 Cu6 59.57(6) . . ?
S8B Cu8 Cu7 149.7(2) . . ?
S8A Cu8 Cu7 135.10(19) . . ?
I7 Cu8 Cu7 59.54(5) . . ?
I6 Cu8 Cu7 106.06(7) . . ?
I8 Cu8 Cu7 58.60(6) . . ?
Cu6 Cu8 Cu7 60.69(6) . . ?
S8B Cu8 Cu5 135.3(2) . . ?
S8A Cu8 Cu5 166.03(19) . . ?
I7 Cu8 Cu5 58.19(6) . . ?
I6 Cu8 Cu5 57.79(5) . . ?
I8 Cu8 Cu5 106.44(7) . . ?
Cu6 Cu8 Cu5 60.40(6) . . ?
Cu7 Cu8 Cu5 57.14(6) . . ?
C1 S1 C4 93.3(6) . . ?
C1 S1 Cu1 108.2(5) . . ?
C4 S1 Cu1 107.9(5) . . ?
C8 S2 C5 93.7(6) . . ?
C8 S2 Cu2 106.8(4) . . ?
C5 S2 Cu2 107.8(4) . . ?
C17 S5 C20 92.3(8) . . ?
C17 S5 Cu5 108.5(7) . . ?
C20 S5 Cu5 108.5(6) . . ?
C21 S6 C24 94.0(5) . . ?
C21 S6 Cu6 110.4(4) . . ?
C24 S6 Cu6 107.3(4) . . ?
C28 S7 C25 91.7(6) . . ?
C28 S7 Cu7 108.1(5) . . ?
C25 S7 Cu7 107.1(5) . . ?
C2 C1 S1 106.3(9) . . ?
C2 C1 H1A 110.5 . . ?
S1 C1 H1A 110.5 . . ?
C2 C1 H1B 110.5 . . ?
S1 C1 H1B 110.5 . . ?
H1A C1 H1B 108.7 . . ?
C3 C2 C1 113.5(12) . . ?
C3 C2 H2A 108.9 . . ?
C1 C2 H2A 108.9 . . ?
C3 C2 H2B 108.9 . . ?
C1 C2 H2B 108.9 . . ?
H2A C2 H2B 107.7 . . ?
C2 C3 C4 111.2(13) . . ?
C2 C3 H3A 109.4 . . ?
C4 C3 H3A 109.4 . . ?
C2 C3 H3B 109.4 . . ?
C4 C3 H3B 109.4 . . ?
H3A C3 H3B 108.0 . . ?
C3 C4 S1 108.4(9) . . ?
C3 C4 H4A 110.0 . . ?
S1 C4 H4A 110.0 . . ?
C3 C4 H4B 110.0 . . ?
S1 C4 H4B 110.0 . . ?
H4A C4 H4B 108.4 . . ?
C6 C5 S2 106.5(9) . . ?
C6 C5 H5A 110.4 . . ?
S2 C5 H5A 110.4 . . ?
C6 C5 H5B 110.4 . . ?
S2 C5 H5B 110.4 . . ?
H5A C5 H5B 108.6 . . ?
C7 C6 C5 114.1(13) . . ?
C7 C6 H6A 108.7 . . ?
C5 C6 H6A 108.7 . . ?
C7 C6 H6B 108.7 . . ?
C5 C6 H6B 108.7 . . ?
H6A C6 H6B 107.6 . . ?
C6 C7 C8 116.5(13) . . ?
C6 C7 H7A 108.2 . . ?
C8 C7 H7A 108.2 . . ?
C6 C7 H7B 108.2 . . ?
C8 C7 H7B 108.2 . . ?
H7A C7 H7B 107.3 . . ?
C7 C8 S2 105.8(9) . . ?
C7 C8 H8A 110.6 . . ?
S2 C8 H8A 110.6 . . ?
C7 C8 H8B 110.6 . . ?
S2 C8 H8B 110.6 . . ?
H8A C8 H8B 108.7 . . ?
C12A S3 C9 95.1(10) . . ?
C9 S3 C12B 89.2(13) . . ?
C12A S3 Cu3 107.6(15) . . ?
C9 S3 Cu3 108.4(5) . . ?
C12B S3 Cu3 110.0(16) . . ?
C10B C9 S3 107.9(18) . . ?
C10A C9 S3 103.5(15) . . ?
C10A C9 H9A 111.1 . . ?
S3 C9 H9A 111.1 . . ?
C10A C9 H9B 111.1 . . ?
S3 C9 H9B 111.1 . . ?
H9A C9 H9B 109.0 . . ?
C11A C10A C9 118(2) . . ?
C11A C10A H10A 107.8 . . ?
C9 C10A H10A 107.8 . . ?
C11A C10A H10B 107.8 . . ?
C9 C10A H10B 107.8 . . ?
H10A C10A H10B 107.1 . . ?
C10A C11A C12A 111(2) . . ?
C10A C11A H11A 109.5 . . ?
C12A C11A H11A 109.5 . . ?
C10A C11A H11B 109.5 . . ?
C12A C11A H11B 109.5 . . ?
H11A C11A H11B 108.1 . . ?
C11A C12A S3 111.2(17) . . ?
C11A C12A H12A 109.4 . . ?
S3 C12A H12A 109.4 . . ?
C11A C12A H12B 109.4 . . ?
S3 C12A H12B 109.4 . . ?
H12A C12A H12B 108.0 . . ?
C11B C10B C9 124(3) . . ?
C11B C10B H10C 106.3 . . ?
C9 C10B H10C 106.3 . . ?
C11B C10B H10D 106.3 . . ?
C9 C10B H10D 106.3 . . ?
H10C C10B H10D 106.4 . . ?
C10B C11B C12B 114(3) . . ?
C10B C11B H11C 108.7 . . ?
C12B C11B H11C 108.7 . . ?
C10B C11B H11D 108.7 . . ?
C12B C11B H11D 108.7 . . ?
H11C C11B H11D 107.6 . . ?
C11B C12B S3 99(3) . . ?
C11B C12B H12C 111.9 . . ?
S3 C12B H12C 111.9 . . ?
C11B C12B H12D 111.9 . . ?
S3 C12B H12D 111.9 . . ?
H12C C12B H12D 109.6 . . ?
C16A S4 C13 92.3(9) . . ?
C13 S4 C16B 86.5(13) . . ?
C16A S4 Cu4 112.2(13) . . ?
C13 S4 Cu4 108.9(5) . . ?
C16B S4 Cu4 98.6(16) . . ?
C14A C13 S4 107.5(13) . . ?
C14B C13 S4 109.7(18) . . ?
C14A C13 H13A 110.2 . . ?
S4 C13 H13A 110.2 . . ?
C14A C13 H13B 110.2 . . ?
S4 C13 H13B 110.2 . . ?
H13A C13 H13B 108.5 . . ?
C15A C14A C13 112(2) . . ?
C15A C14A H14A 109.3 . . ?
C13 C14A H14A 109.3 . . ?
C15A C14A H14B 109.3 . . ?
C13 C14A H14B 109.3 . . ?
H14A C14A H14B 108.0 . . ?
C14A C15A C16A 117(3) . . ?
C14A C15A H15A 107.9 . . ?
C16A C15A H15A 107.9 . . ?
C14A C15A H15B 107.9 . . ?
C16A C15A H15B 107.9 . . ?
H15A C15A H15B 107.2 . . ?
C15A C16A S4 106.0(14) . . ?
C15A C16A H16A 110.5 . . ?
S4 C16A H16A 110.5 . . ?
C15A C16A H16B 110.5 . . ?
S4 C16A H16B 110.5 . . ?
H16A C16A H16B 108.7 . . ?
C15B C14B C13 117(4) . . ?
C15B C14B H14C 108.1 . . ?
C13 C14B H14C 108.1 . . ?
C15B C14B H14D 108.1 . . ?
C13 C14B H14D 108.1 . . ?
H14C C14B H14D 107.3 . . ?
C14B C15B C16B 116(4) . . ?
C14B C15B H15C 108.4 . . ?
C16B C15B H15C 108.4 . . ?
C14B C15B H15D 108.4 . . ?
C16B C15B H15D 108.4 . . ?
H15C C15B H15D 107.4 . . ?
C15B C16B S4 105(3) . . ?
C15B C16B H16C 110.7 . . ?
S4 C16B H16C 110.7 . . ?
C15B C16B H16D 110.7 . . ?
S4 C16B H16D 110.7 . . ?
H16C C16B H16D 108.8 . . ?
C18 C17 S5 107.8(12) . . ?
C18 C17 H17A 110.1 . . ?
S5 C17 H17A 110.1 . . ?
C18 C17 H17B 110.1 . . ?
S5 C17 H17B 110.1 . . ?
H17A C17 H17B 108.5 . . ?
C19 C18 C17 113.9(17) . . ?
C19 C18 H18A 108.8 . . ?
C17 C18 H18A 108.8 . . ?
C19 C18 H18B 108.8 . . ?
C17 C18 H18B 108.8 . . ?
H18A C18 H18B 107.7 . . ?
C18 C19 C20 119.9(17) . . ?
C18 C19 H19A 107.4 . . ?
C20 C19 H19A 107.4 . . ?
C18 C19 H19B 107.4 . . ?
C20 C19 H19B 107.4 . . ?
H19A C19 H19B 106.9 . . ?
C19 C20 S5 105.1(12) . . ?
C19 C20 H20A 110.7 . . ?
S5 C20 H20A 110.7 . . ?
C19 C20 H20B 110.7 . . ?
S5 C20 H20B 110.7 . . ?
H20A C20 H20B 108.8 . . ?
C22 C21 S6 106.9(8) . . ?
C22 C21 H21A 110.4 . . ?
S6 C21 H21A 110.4 . . ?
C22 C21 H21B 110.4 . . ?
S6 C21 H21B 110.4 . . ?
H21A C21 H21B 108.6 . . ?
C23 C22 C21 114.7(12) . . ?
C23 C22 H22A 108.6 . . ?
C21 C22 H22A 108.6 . . ?
C23 C22 H22B 108.6 . . ?
C21 C22 H22B 108.6 . . ?
H22A C22 H22B 107.6 . . ?
C22 C23 C24 118.5(12) . . ?
C22 C23 H23A 107.7 . . ?
C24 C23 H23A 107.7 . . ?
C22 C23 H23B 107.7 . . ?
C24 C23 H23B 107.7 . . ?
H23A C23 H23B 107.1 . . ?
C23 C24 S6 105.6(9) . . ?
C23 C24 H24A 110.6 . . ?
S6 C24 H24A 110.6 . . ?
C23 C24 H24B 110.6 . . ?
S6 C24 H24B 110.6 . . ?
H24A C24 H24B 108.8 . . ?
C26 C25 S7 103.9(10) . . ?
C26 C25 H25A 111.0 . . ?
S7 C25 H25A 111.0 . . ?
C26 C25 H25B 111.0 . . ?
S7 C25 H25B 111.0 . . ?
H25A C25 H25B 109.0 . . ?
C27 C26 C25 107.2(11) . . ?
C27 C26 H26A 110.3 . . ?
C25 C26 H26A 110.3 . . ?
C27 C26 H26B 110.3 . . ?
C25 C26 H26B 110.3 . . ?
H26A C26 H26B 108.5 . . ?
C26 C27 C28 109.8(13) . . ?
C26 C27 H27A 109.7 . . ?
C28 C27 H27A 109.7 . . ?
C26 C27 H27B 109.7 . . ?
C28 C27 H27B 109.7 . . ?
H27A C27 H27B 108.2 . . ?
C27 C28 S7 107.5(9) . . ?
C27 C28 H28A 110.2 . . ?
S7 C28 H28A 110.2 . . ?
C27 C28 H28B 110.2 . . ?
S7 C28 H28B 110.2 . . ?
H28A C28 H28B 108.5 . . ?
C29A S8A C32A 92.4(10) . . ?
C29A S8A Cu8 104.5(11) . . ?
C32A S8A Cu8 108.3(11) . . ?
C30A C29A S8A 102.9(15) . . ?
C30A C29A H29A 111.2 . . ?
S8A C29A H29A 111.2 . . ?
C30A C29A H29B 111.2 . . ?
S8A C29A H29B 111.2 . . ?
H29A C29A H29B 109.1 . . ?
C31A C30A C29A 113(3) . . ?
C31A C30A H30A 108.9 . . ?
C29A C30A H30A 108.9 . . ?
C31A C30A H30B 108.9 . . ?
C29A C30A H30B 108.9 . . ?
H30A C30A H30B 107.7 . . ?
C30A C31A C32A 110(2) . . ?
C30A C31A H31A 109.7 . . ?
C32A C31A H31A 109.7 . . ?
C30A C31A H31B 109.7 . . ?
C32A C31A H31B 109.7 . . ?
H31A C31A H31B 108.2 . . ?
C31A C32A S8A 108.2(15) . . ?
C31A C32A H32A 110.1 . . ?
S8A C32A H32A 110.1 . . ?
C31A C32A H32B 110.1 . . ?
S8A C32A H32B 110.1 . . ?
H32A C32A H32B 108.4 . . ?
C29B S8B C32B 92.0(12) . . ?
C29B S8B Cu8 111.2(19) . . ?
C32B S8B Cu8 103.0(17) . . ?
C30B C29B S8B 106.4(17) . . ?
C30B C29B H29C 110.4 . . ?
S8B C29B H29C 110.4 . . ?
C30B C29B H29D 110.4 . . ?
S8B C29B H29D 110.4 . . ?
H29C C29B H29D 108.6 . . ?
C31B C30B C29B 110(3) . . ?
C31B C30B H30C 109.6 . . ?
C29B C30B H30C 109.6 . . ?
C31B C30B H30D 109.6 . . ?
C29B C30B H30D 109.6 . . ?
H30C C30B H30D 108.1 . . ?
C30B C31B C32B 108(3) . . ?
C30B C31B H31C 110.0 . . ?
C32B C31B H31C 110.0 . . ?
C30B C31B H31D 110.0 . . ?
C32B C31B H31D 110.0 . . ?
H31C C31B H31D 108.4 . . ?
C31B C32B S8B 107.0(16) . . ?
C31B C32B H32C 110.3 . . ?
S8B C32B H32C 110.3 . . ?
C31B C32B H32D 110.3 . . ?
S8B C32B H32D 110.3 . . ?
H32C C32B H32D 108.6 . . ?
 
loop_
 _geom_torsion_atom_site_label_1
 _geom_torsion_atom_site_label_2
 _geom_torsion_atom_site_label_3
 _geom_torsion_atom_site_label_4
 _geom_torsion
 _geom_torsion_site_symmetry_1
 _geom_torsion_site_symmetry_2
 _geom_torsion_site_symmetry_3
 _geom_torsion_site_symmetry_4
 _geom_torsion_publ_flag
C4 S1 C1 C2 -11.0(13) . . . . ?
Cu1 S1 C1 C2 -121.1(11) . . . . ?
S1 C1 C2 C3 25(2) . . . . ?
C1 C2 C3 C4 -30(2) . . . . ?
C2 C3 C4 S1 20(2) . . . . ?
C1 S1 C4 C3 -4.4(13) . . . . ?
Cu1 S1 C4 C3 106.0(11) . . . . ?
C8 S2 C5 C6 5.6(12) . . . . ?
Cu2 S2 C5 C6 114.5(11) . . . . ?
S2 C5 C6 C7 5(2) . . . . ?
C5 C6 C7 C8 -17(3) . . . . ?
C6 C7 C8 S2 20(2) . . . . ?
C5 S2 C8 C7 -13.6(13) . . . . ?
Cu2 S2 C8 C7 -123.5(12) . . . . ?
C12A S3 C9 C10B -19(3) . . . . ?
C12B S3 C9 C10B -19(3) . . . . ?
Cu3 S3 C9 C10B 91(3) . . . . ?
C12A S3 C9 C10A 10(3) . . . . ?
C12B S3 C9 C10A 9(3) . . . . ?
Cu3 S3 C9 C10A 120(2) . . . . ?
C10B C9 C10A C11A 89(4) . . . . ?
S3 C9 C10A C11A -14(5) . . . . ?
C9 C10A C11A C12A 11(6) . . . . ?
C10A C11A C12A S3 -3(5) . . . . ?
C9 S3 C12A C11A -5(3) . . . . ?
C12B S3 C12A C11A -2(26) . . . . ?
Cu3 S3 C12A C11A -116(3) . . . . ?
C10A C9 C10B C11B -69(5) . . . . ?
S3 C9 C10B C11B 16(6) . . . . ?
C9 C10B C11B C12B 1(7) . . . . ?
C10B C11B C12B S3 -15(6) . . . . ?
C16A S4 C13 C14A -8(2) . . . . ?
C16B S4 C13 C14A -25(2) . . . . ?
Cu4 S4 C13 C14A -123(2) . . . . ?
C16A S4 C13 C14B 28(3) . . . . ?
C16B S4 C13 C14B 12(3) . . . . ?
Cu4 S4 C13 C14B -86(3) . . . . ?
C14B C13 C14A C15A -79(5) . . . . ?
S4 C13 C14A C15A 20(4) . . . . ?
C13 C14A C15A C16A -26(7) . . . . ?
C14A C15A C16A S4 19(6) . . . . ?
C13 S4 C16A C15A -4(3) . . . . ?
C16B S4 C16A C15A 66(6) . . . . ?
Cu4 S4 C16A C15A 107(3) . . . . ?
C14A C13 C14B C15B 66(6) . . . . ?
S4 C13 C14B C15B -27(7) . . . . ?
C13 C14B C15B C16B 28(9) . . . . ?
C14B C15B C16B S4 -16(8) . . . . ?
C20 S5 C17 C18 1(2) . . . . ?
Cu5 S5 C17 C18 111.8(18) . . . . ?
S5 C17 C18 C19 -8(4) . . . . ?
C17 C18 C19 C20 12(5) . . . . ?
C18 C19 C20 S5 -10(4) . . . . ?
C17 S5 C20 C19 4.2(19) . . . . ?
Cu5 S5 C20 C19 -106.3(17) . . . . ?
C24 S6 C21 C22 -4.6(12) . . . . ?
Cu6 S6 C21 C22 -114.7(10) . . . . ?
S6 C21 C22 C23 7(2) . . . . ?
C21 C22 C23 C24 -6(3) . . . . ?
C22 C23 C24 S6 2(2) . . . . ?
C21 S6 C24 C23 1.8(13) . . . . ?
Cu6 S6 C24 C23 114.6(12) . . . . ?
C28 S7 C25 C26 -20.1(11) . . . . ?
Cu7 S7 C25 C26 -129.6(9) . . . . ?
S7 C25 C26 C27 41.2(15) . . . . ?
C25 C26 C27 C28 -48.5(18) . . . . ?
C26 C27 C28 S7 31.2(16) . . . . ?
C25 S7 C28 C27 -5.3(12) . . . . ?
Cu7 S7 C28 C27 103.3(11) . . . . ?
C32A S8A C29A C30A 25(3) . . . . ?
Cu8 S8A C29A C30A -84(3) . . . . ?
S8A C29A C30A C31A -39(5) . . . . ?
C29A C30A C31A C32A 35(6) . . . . ?
C30A C31A C32A S8A -12(5) . . . . ?
C29A S8A C32A C31A -8(3) . . . . ?
Cu8 S8A C32A C31A 98(3) . . . . ?
C32B S8B C29B C30B -14(5) . . . . ?
Cu8 S8B C29B C30B -119(4) . . . . ?
S8B C29B C30B C31B 36(6) . . . . ?
C29B C30B C31B C32B -44(6) . . . . ?
C30B C31B C32B S8B 31(5) . . . . ?
C29B S8B C32B C31B -9(5) . . . . ?
Cu8 S8B C32B C31B 104(4) . . . . ?
 
_refine_diff_density_max    1.003
_refine_diff_density_min   -2.086
_refine_diff_density_rms    0.159

_shelxl_version_number 2013-2

_shelx_res_file
;
TITL P21onn in P2(1)/n
CELL 1.54178   9.5824  34.9161  17.9841  90.000  91.281  90.000
ZERR    8.00   0.0002   0.0006   0.0003   0.000   0.001   0.000
LATT  1
SYMM 0.5-X, 0.5+Y, 0.5-Z
SFAC C H S CU I
UNIT 128 256 32 32 32
LIST 4
TEMP -23.000
SIZE 0.150 0.160 0.350

L.S. 20
BOND $H
CONF
OMIT -2 134
OMIT 3 2 1
OMIT 0 4 0
OMIT 0 1 1
OMIT -1 0 1
OMIT 0 2 0
FMAP 2
PLAN 5
ACTA

WGHT    0.044100   43.506721
FVAR       0.03269   0.68091   0.69272   0.51238
MOLE   1

I1    5   -0.000043    0.212290    0.613226    11.00000    0.06406    0.05235 =
         0.05537    0.01223    0.01780    0.00177
I2    5    0.016066    0.268836    0.392444    11.00000    0.06478    0.05872 =
         0.05274    0.01329   -0.01866   -0.00820
I3    5    0.329375    0.300519    0.564679    11.00000    0.05575    0.06698 =
         0.06228   -0.01786    0.00095   -0.01886
I4    5    0.350721    0.185071    0.461076    11.00000    0.06172    0.07491 =
         0.05689   -0.01748    0.00421    0.01546
I5    5    0.887895    0.565729    0.348581    11.00000    0.05871    0.05052 =
         0.06177   -0.00669    0.00274   -0.00527
I6    5    0.977708    0.466501    0.208790    11.00000    0.07940    0.06424 =
         0.05822   -0.00501    0.00537    0.02581
I7    5    0.623559    0.536931    0.142880    11.00000    0.09747    0.10669 =
         0.05843    0.00187   -0.02090    0.03489
I8    5    0.592706    0.470834    0.352502    11.00000    0.05737    0.06260 =
         0.14905    0.04838   -0.00110   -0.00747
CU1   4    0.081108    0.205662    0.472693    11.00000    0.06097    0.05511 =
         0.05474   -0.00511   -0.00909   -0.01021
CU2   4    0.066944    0.276471    0.537157    11.00000    0.05393    0.05448 =
         0.05962    0.00008    0.00719    0.00309
CU3   4    0.279309    0.258652    0.441868    11.00000    0.05942    0.07866 =
         0.05277   -0.00227    0.00831   -0.01538
CU4   4    0.266774    0.225860    0.578675    11.00000    0.06193    0.07323 =
         0.04565   -0.00374   -0.01084    0.01133
CU5   4    0.876167    0.537811    0.209908    11.00000    0.07526    0.06506 =
         0.05964    0.00855    0.01727    0.00585
CU6   4    0.863333    0.490501    0.335670    11.00000    0.06712    0.05614 =
         0.06407    0.00873   -0.00338    0.01121
CU7   4    0.647461    0.538804    0.291958    11.00000    0.05227    0.05641 =
         0.06508    0.00669    0.01118    0.00714
CU8   4    0.698395    0.472919    0.214101    11.00000    0.07867    0.06890 =
         0.11926   -0.02689   -0.03304    0.00741
S1    3   -0.041421    0.154633    0.425868    11.00000    0.08635    0.05239 =
         0.07011   -0.00124   -0.01784   -0.01773
S2    3   -0.070961    0.324433    0.583776    11.00000    0.06844    0.04470 =
         0.05864    0.00650    0.00518    0.00696
S5    3    1.004588    0.580445    0.141415    11.00000    0.14438    0.07159 =
         0.09768    0.01094    0.06544    0.00151
S6    3    0.969117    0.458535    0.433402    11.00000    0.05933    0.05109 =
         0.05120    0.00297    0.00341    0.00955
S7    3    0.476142    0.581516    0.323410    11.00000    0.08168    0.07322 =
         0.08817    0.04228    0.04347    0.03332
C1    1   -0.025585    0.154590    0.327658    11.00000    0.09078    0.10109 =
         0.07085   -0.04120    0.01030   -0.00833
AFIX  23
H1A   2    0.030283    0.176488    0.311706    11.00000   -1.20000
H1B   2    0.019556    0.130980    0.311163    11.00000   -1.20000
AFIX   0
C2    1   -0.167775    0.157184    0.296580    11.00000    0.11686    0.19839 =
         0.05707   -0.00194   -0.01431    0.03180
AFIX  23
H2A   2   -0.165896    0.171802    0.250095    11.00000   -1.20000
H2B   2   -0.201133    0.131332    0.284590    11.00000   -1.20000
AFIX   0
C3    1   -0.261221    0.174435    0.344079    11.00000    0.06861    0.15041 =
         0.11428   -0.02265   -0.02066    0.01737
AFIX  23
H3A   2   -0.355073    0.164229    0.334165    11.00000   -1.20000
H3B   2   -0.263531    0.202067    0.334575    11.00000   -1.20000
AFIX   0
C4    1   -0.222033    0.167664    0.421210    11.00000    0.06384    0.17048 =
         0.08666   -0.03367    0.00932   -0.06026
AFIX  23
H4A   2   -0.279051    0.147019    0.441516    11.00000   -1.20000
H4B   2   -0.237448    0.190865    0.450574    11.00000   -1.20000
AFIX   0
C5    1   -0.242619    0.304533    0.598622    11.00000    0.04538    0.08334 =
         0.09450   -0.01463   -0.00117    0.01103
AFIX  23
H5A   2   -0.314233    0.319868    0.572716    11.00000   -1.20000
H5B   2   -0.247847    0.278201    0.579903    11.00000   -1.20000
AFIX   0
C6    1   -0.264054    0.305303    0.680426    11.00000    0.10791    0.17190 =
         0.08779   -0.05632    0.04877   -0.06053
AFIX  23
H6A   2   -0.351919    0.318582    0.690060    11.00000   -1.20000
H6B   2   -0.273274    0.278917    0.698231    11.00000   -1.20000
AFIX   0
C7    1   -0.160221    0.322644    0.719748    11.00000    0.11640    0.26316 =
         0.05056    0.01252    0.00940    0.00823
AFIX  23
H7A   2   -0.141536    0.307585    0.764865    11.00000   -1.20000
H7B   2   -0.193628    0.347842    0.735452    11.00000   -1.20000
AFIX   0
C8    1   -0.029000    0.327952    0.681919    11.00000    0.09543    0.07423 =
         0.05480   -0.01752   -0.00725   -0.01194
AFIX  23
H8A   2    0.038269    0.308109    0.696903    11.00000   -1.20000
H8B   2    0.011133    0.353095    0.693778    11.00000   -1.20000
AFIX   0
S3    3    0.414405    0.277932    0.344460    11.00000    0.10365    0.09542 =
         0.06332   -0.01831    0.03400   -0.03660
C9    1    0.403641    0.328497    0.337010    11.00000    0.08626    0.10244 =
         0.09816    0.02976   -0.00207    0.02326
AFIX  23
H9A   2    0.366625    0.336165    0.287999    11.00000   -1.20000
H9B   2    0.344101    0.339174    0.375464    11.00000   -1.20000
AFIX   0
PART 1
C10A  1    0.555964    0.341670    0.348218    21.00000    0.11922    0.10903 =
         0.14416    0.03603    0.01078   -0.05744
AFIX  23
H10A  2    0.589215    0.350622    0.300100    21.00000   -1.20000
H10B  2    0.556244    0.363808    0.381717    21.00000   -1.20000
AFIX   0
C11A  1    0.644798    0.317373    0.374136    21.00000    0.06071    0.11430 =
         0.29104   -0.04252   -0.00642    0.01039
AFIX  23
H11A  2    0.672941    0.324633    0.424929    21.00000   -1.20000
H11B  2    0.728168    0.317567    0.343555    21.00000   -1.20000
AFIX   0
C12A  1    0.582453    0.277410    0.374460    21.00000    0.05490    0.08198 =
         0.38158    0.05535    0.09671    0.02224
AFIX  23
H12A  2    0.587953    0.266985    0.425035    21.00000   -1.20000
H12B  2    0.636649    0.260676    0.342237    21.00000   -1.20000
AFIX   0
PART 2
SAME C10A C11A C12A
C10B  1    0.509304    0.343755    0.378709   -21.00000    0.05948
AFIX  23
H10C  2    0.545837    0.365246    0.349993   -21.00000   -1.20000
H10D  2    0.466374    0.354897    0.422679   -21.00000   -1.20000
AFIX   0
C11B  1    0.615635    0.324819    0.402506   -21.00000    0.08264
AFIX  23
H11C  2    0.619151    0.326082    0.456953   -21.00000   -1.20000
H11D  2    0.700231    0.337144    0.384378   -21.00000   -1.20000
AFIX   0
C12B  1    0.616467    0.283234    0.379199   -21.00000    0.07310
AFIX  23
H12C  2    0.638976    0.266182    0.421056   -21.00000   -1.20000
H12D  2    0.681320    0.278553    0.338821   -21.00000   -1.20000
AFIX   0
PART 0
S4    3    0.383027    0.207726    0.685203    11.00000    0.08882    0.11802 =
         0.04993   -0.00045   -0.02034    0.02901
C13   1    0.564818    0.209727    0.670127    11.00000    0.08782    0.10025 =
         0.14304    0.04769   -0.03976   -0.04033
AFIX  23
H13A  2    0.582358    0.217106    0.618597    11.00000   -1.20000
H13B  2    0.608864    0.228681    0.703281    11.00000   -1.20000
AFIX   0
PART 1
C14A  1    0.620630    0.172564    0.685035    31.00000    0.07372    0.14353 =
         0.12509    0.02661    0.00527    0.02220
AFIX  23
H14A  2    0.692544    0.166716    0.648837    31.00000   -1.20000
H14B  2    0.664762    0.172341    0.734720    31.00000   -1.20000
AFIX   0
C15A  1    0.526771    0.147112    0.681594    31.00000    0.11166    0.07332 =
         0.55711    0.09823    0.11123    0.03155
AFIX  23
H15A  2    0.552337    0.126856    0.717075    31.00000   -1.20000
H15B  2    0.527696    0.135754    0.631776    31.00000   -1.20000
AFIX   0
C16A  1    0.386415    0.158743    0.696057    31.00000    0.06657    0.09777 =
         0.12207    0.05816    0.00038   -0.01990
AFIX  23
H16A  2    0.361039    0.151689    0.746736    31.00000   -1.20000
H16B  2    0.320744    0.146483    0.660937    31.00000   -1.20000
AFIX   0
PART 2
SAME C14A C15A C16A
C14B  1    0.614336    0.171200    0.635018   -31.00000    0.09065
AFIX  23
H14C  2    0.615591    0.174493    0.580920   -31.00000   -1.20000
H14D  2    0.710687    0.166493    0.652028   -31.00000   -1.20000
AFIX   0
C15B  1    0.542909    0.141580    0.648946   -31.00000    0.08693
AFIX  23
H15C  2    0.585289    0.128711    0.692293   -31.00000   -1.20000
H15D  2    0.549014    0.124015    0.606642   -31.00000   -1.20000
AFIX   0
C16B  1    0.398049    0.148186    0.663346   -31.00000    0.07336
AFIX  23
H16C  2    0.368532    0.133234    0.706348   -31.00000   -1.20000
H16D  2    0.339604    0.141121    0.620082   -31.00000   -1.20000
AFIX   0
PART 0
C17   1    1.181310    0.565598    0.144129    11.00000    0.11334    0.25222 =
         0.07112    0.02341   -0.01280   -0.07616
AFIX  23
H17A  2    1.241779    0.586920    0.159617    11.00000   -1.20000
H17B  2    1.194302    0.544604    0.179783    11.00000   -1.20000
AFIX   0
C18   1    1.216403    0.552969    0.070186    11.00000    0.11282    0.34004 =
         0.10605    0.02888    0.02306    0.10037
AFIX  23
H18A  2    1.285855    0.570529    0.050077    11.00000   -1.20000
H18B  2    1.259312    0.527538    0.073728    11.00000   -1.20000
AFIX   0
C19   1    1.113200    0.551331    0.025450    11.00000    0.09465    0.34375 =
         0.11840   -0.12789    0.02730   -0.00380
AFIX  23
H19A  2    1.095038    0.524209    0.015083    11.00000   -1.20000
H19B  2    1.141802    0.563023   -0.021347    11.00000   -1.20000
AFIX   0
C20   1    0.984267    0.568317    0.044849    11.00000    0.08924    0.26560 =
         0.06046    0.06475   -0.00459   -0.01795
AFIX  23
H20A  2    0.907081    0.550231    0.037158    11.00000   -1.20000
H20B  2    0.965754    0.591273    0.014866    11.00000   -1.20000
AFIX   0
C21   1    1.155281    0.457002    0.421928    11.00000    0.06105    0.06028 =
         0.08587    0.00752   -0.00672   -0.00438
AFIX  23
H21A  2    1.181513    0.472084    0.378460    11.00000   -1.20000
H21B  2    1.203628    0.467508    0.465980    11.00000   -1.20000
AFIX   0
C22   1    1.193866    0.415652    0.411439    11.00000    0.05416    0.07721 =
         0.21040   -0.03209    0.01237    0.01825
AFIX  23
H22A  2    1.249640    0.413449    0.366624    11.00000   -1.20000
H22B  2    1.252778    0.407547    0.453818    11.00000   -1.20000
AFIX   0
C23   1    1.087673    0.392228    0.405281    11.00000    0.08850    0.04876 =
         0.28428   -0.01801    0.05506    0.01462
AFIX  23
H23A  2    1.102973    0.371385    0.441037    11.00000   -1.20000
H23B  2    1.089084    0.380858    0.355482    11.00000   -1.20000
AFIX   0
C24   1    0.945861    0.407615    0.416571    11.00000    0.08033    0.04820 =
         0.08851    0.00948    0.00666   -0.00908
AFIX  23
H24A  2    0.902772    0.395270    0.459279    11.00000   -1.20000
H24B  2    0.886383    0.403316    0.372321    11.00000   -1.20000
AFIX   0
C25   1    0.504625    0.593498    0.423531    11.00000    0.09616    0.08562 =
         0.14029   -0.06413    0.00362   -0.00375
AFIX  23
H25A  2    0.574292    0.576462    0.446681    11.00000   -1.20000
H25B  2    0.535669    0.620079    0.429607    11.00000   -1.20000
AFIX   0
C26   1    0.365155    0.587690    0.456396    11.00000    0.11938    0.08135 =
         0.08120   -0.00282    0.02769    0.00502
AFIX  23
H26A  2    0.374339    0.584891    0.510505    11.00000   -1.20000
H26B  2    0.304562    0.609677    0.445408    11.00000   -1.20000
AFIX   0
C27   1    0.306800    0.553341    0.423745    11.00000    0.08519    0.13431 =
         0.07332   -0.00484    0.02903   -0.02796
AFIX  23
H27A  2    0.208184    0.551152    0.436419    11.00000   -1.20000
H27B  2    0.356139    0.530868    0.443698    11.00000   -1.20000
AFIX   0
C28   1    0.319679    0.554596    0.343291    11.00000    0.04302    0.15119 =
         0.08085   -0.02603    0.00605    0.00781
AFIX  23
H28A  2    0.237748    0.567061    0.320429    11.00000   -1.20000
H28B  2    0.326561    0.528581    0.323254    11.00000   -1.20000
AFIX   0
PART 1
SAME S1 C1 C2 C3 C4
S8A   3    0.571833    0.415593    0.188558    41.00000    0.08990    0.06121 =
         0.05847    0.00347   -0.00667   -0.00510
C29A  1    0.570476    0.411637    0.089814    41.00000    0.10527    0.10070 =
         0.09486   -0.03850    0.02811   -0.03113
AFIX  23
H29A  2    0.657655    0.421253    0.069305    41.00000   -1.20000
H29B  2    0.556478    0.385034    0.073964    41.00000   -1.20000
AFIX   0
C30A  1    0.453334    0.435365    0.067317    41.00000    0.31091    0.48101 =
         0.08517   -0.05147   -0.15618    0.18132
AFIX  23
H30A  2    0.483648    0.462163    0.066334    41.00000   -1.20000
H30B  2    0.423561    0.428284    0.016674    41.00000   -1.20000
AFIX   0
C31A  1    0.340099    0.432164    0.113768    41.00000    0.06427    0.25001 =
         0.08602   -0.00440    0.00279    0.05326
AFIX  23
H31A  2    0.281689    0.410473    0.097978    41.00000   -1.20000
H31B  2    0.283357    0.455479    0.110480    41.00000   -1.20000
AFIX   0
C32A  1    0.388480    0.426490    0.189624    41.00000    0.06015    0.15843 =
         0.07714   -0.01998    0.01819   -0.06402
AFIX  23
H32A  2    0.337314    0.405347    0.212287    41.00000   -1.20000
H32B  2    0.372726    0.449716    0.218857    41.00000   -1.20000
AFIX   0
PART 2
SAME S8A C29A C30A C31A C32A
S8B   3    0.623418    0.426210    0.127912   -41.00000    0.06588    0.09324 =
         0.09218   -0.03627   -0.00116   -0.00368
C29B  1    0.486653    0.443650    0.070049   -41.00000    0.63651    0.07679 =
         0.13082    0.06503    0.05897   -0.00585
AFIX  23
H29C  2    0.464974    0.470264    0.082681   -41.00000   -1.20000
H29D  2    0.512973    0.442565    0.017746   -41.00000   -1.20000
AFIX   0
C30B  1    0.367100    0.419205    0.082727   -41.00000    0.12359    0.21379 =
         0.24392    0.15226   -0.13227   -0.11302
AFIX  23
H30C  2    0.281055    0.433005    0.069425   -41.00000   -1.20000
H30D  2    0.372343    0.396422    0.051089   -41.00000   -1.20000
AFIX   0
C31B  1    0.364155    0.408180    0.157041   -41.00000    0.04782    0.14372 =
         0.68734    0.11081    0.04655   -0.02712
AFIX  23
H31C  2    0.300699    0.386424    0.162814   -41.00000   -1.20000
H31D  2    0.330679    0.429401    0.187530   -41.00000   -1.20000
AFIX   0
C32B  1    0.504651    0.397464    0.180917   -41.00000    0.32048    0.08367 =
         0.16278    0.01240    0.06562   -0.08573
AFIX  23
H32C  2    0.520655    0.370177    0.171612   -41.00000   -1.20000
H32D  2    0.518368    0.402355    0.234239   -41.00000   -1.20000
PART 0
AFIX   0
HKLF 4

REM  P21onn in P2(1)/n
REM R1 =  0.0476 for    7632 Fo > 4sig(Fo)  and  0.0529 for all    8498 data
REM    577 parameters refined using     36 restraints

END

WGHT      0.0389     45.3215

REM Highest difference peak  1.003,  deepest hole -2.086,  1-sigma level  0.159
Q1    1   0.5519  0.4701  0.3134  11.00000  0.05    1.00
Q2    1   0.4564  0.2200  0.6625  11.00000  0.05    0.87
Q3    1   0.4386  0.2986  0.5614  11.00000  0.05    0.83
Q4    1   0.8701  0.4653  0.2039  11.00000  0.05    0.77
Q5    1   0.5608  0.4649  0.3771  11.00000  0.05    0.75
;
_shelx_res_checksum   96266

_shelx_hkl_file
;
  -1   0   0    1.69    0.22
  -1   0   0    1.17    0.22
  -1   0   0    0.56    0.14
  -2   0   0  266.17   25.64
  -2   0   0  313.01   25.93
  -2   0   0  283.99   26.96
   3   0   0    0.42    0.27
  -3   0   0    0.54    0.17
  -3   0   0    0.05    0.22
  -3   0   0    0.57    0.49
  -3   0   0    0.20    0.21
  -4   0   0   65.91    7.04
  -4   0   0   59.96    7.05
  -4   0   0   65.38    5.84
  -4   0   0   65.54    6.10
  -5   0   0    0.07    0.12
  -5   0   0    0.23    0.20
  -5   0   0    0.07    0.26
  -5   0   0   -0.29    0.65
  -6   0   0   31.80    3.64
  -6   0   0   25.95    2.75
  -6   0   0   31.31    3.33
  -7   0   0   -0.07    0.23
   0  -1   0    0.00    0.03
   0   1   0    0.10    0.02
  -1  -1   0    3.86    0.37
  -1  -1   0    3.46    0.46
   1  -1   0    4.07    0.41
  -1   1   0    3.17    0.44
  -1   1   0    3.74    0.38
   2  -1   0   59.89    5.00
  -2  -1   0   50.98    5.02
  -2  -1   0   54.06    4.93
  -2  -1   0   56.22    5.15
  -2   1   0   45.66    4.94
  -2   1   0   57.45    5.16
  -3  -1   0   41.22    3.97
  -3  -1   0   43.16    3.77
  -3  -1   0   41.26    3.92
   3  -1   0   42.87    3.90
  -3  -1   0   38.81    4.58
  -3  -1   0   43.88    3.82
  -3  -1   0   43.71    4.62
  -3   1   0   40.14    3.83
  -3   1   0   41.20    3.97
  -3   1   0   34.38    4.61
  -3   1   0   44.52    4.62
  -4  -1   0  179.22   16.53
   4  -1   0  186.88   16.00
  -4  -1   0  169.67   15.70
  -4  -1   0  178.80   15.74
  -4  -1   0  163.45   18.61
  -4  -1   0  164.53   19.04
  -4   1   0  181.10   15.75
  -4   1   0  152.55   18.62
   4   1   0  191.10   16.00
  -4   1   0  183.83   16.54
  -4   1   0  178.06   19.06
  -5  -1   0    1.88    0.78
  -5  -1   0    2.06    0.31
  -5  -1   0    1.70    0.46
  -5  -1   0    2.52    0.41
  -5   1   0    1.89    0.36
  -5   1   0    1.90    0.30
  -5   1   0    2.05    0.49
  -5   1   0    1.82    0.84
  -6  -1   0    0.28    0.20
  -6  -1   0    0.96    0.40
  -6   1   0    0.67    0.20
  -6   1   0   -0.23    0.79
  -6   1   0    0.57    0.38
  -7  -1   0   11.24    1.21
  -7   1   0   11.02    1.19
  -8   1   0    7.50    0.96
   0  -2   0    1.96    0.26
   0   2   0    1.23    0.25
   0   2   0    1.58    0.25
   1  -2   0    1.09    0.26
  -1  -2   0    3.49    0.44
  -1  -2   0    0.86    0.16
  -1  -2   0    1.21    0.14
  -1   2   0    1.39    0.25
  -1   2   0    1.04    0.15
   2  -2   0    1.21    0.33
  -2  -2   0    1.31    0.24
  -2  -2   0    1.59    0.41
  -2  -2   0    1.23    0.18
  -2   2   0    1.17    0.19
  -2   2   0    0.66    0.36
  -3  -2   0    0.08    0.44
  -3  -2   0    0.39    0.21
  -3  -2   0    0.49    0.25
  -3  -2   0    0.40    0.15
  -3  -2   0    0.46    0.18
  -3  -2   0    0.36    0.34
   3  -2   0    0.59    0.32
  -3   2   0    0.19    0.14
  -3   2   0    0.73    0.56
  -3   2   0    0.65    0.29
  -3   2   0    0.39    0.25
  -4  -2   0  224.19   20.62
  -4  -2   0  249.79   19.64
   4  -2   0  234.71   19.94
  -4  -2   0  205.10   23.16
  -4  -2   0  209.09   19.58
  -4  -2   0  204.56   23.73
  -4   2   0  226.25   20.63
  -4   2   0  199.21   19.62
  -4   2   0  220.90   23.76
  -5  -2   0   14.01    1.48
  -5  -2   0   15.07    1.84
  -5  -2   0   17.62    2.07
  -5  -2   0   15.28    1.56
  -5   2   0   16.55    2.29
  -5   2   0   15.80    1.87
  -5   2   0   15.01    1.49
  -5   2   0   14.91    1.56
  -6  -2   0    7.69    0.85
  -6   2   0    8.51    1.20
   6   2   0    7.94    1.00
  -6   2   0    7.51    0.84
  -6   2   0   10.41    1.76
  -6   2   0    6.77    0.95
   7  -2   0    0.71    0.49
  -7   2   0    0.81    0.28
  -8   2   0    4.58    0.69
   0  -3   0    0.21    0.08
   0   3   0    0.07    0.03
   0   3   0    0.06    0.05
  -1  -3   0    9.55    0.92
  -1  -3   0    8.85    0.90
   1  -3   0    9.48    1.01
  -1  -3   0   10.53    1.03
  -1   3   0    9.74    0.96
  -1   3   0    9.98    0.94
   2  -3   0   71.83    5.91
  -2  -3   0   61.38    5.97
  -2  -3   0   64.57    6.03
  -2  -3   0   67.40    5.77
  -2   3   0   63.61    6.05
  -2   3   0   53.67    5.84
  -3  -3   0   84.25    8.18
  -3  -3   0   95.02    9.30
  -3  -3   0   80.22    8.00
  -3  -3   0   85.78    7.78
  -3  -3   0   90.37    7.82
  -3  -3   0   82.43    9.44
   3  -3   0   96.31    8.00
  -3   3   0   93.13    9.48
  -3   3   0   89.78    8.19
  -3   3   0   71.79    7.84
  -4  -3   0   70.63    7.38
  -4  -3   0   63.75    7.43
  -4  -3   0   78.57    6.18
  -4  -3   0   62.88    6.12
  -4  -3   0   73.39    6.39
  -4  -3   0   73.02    6.45
   4  -3   0   66.60    6.34
  -4   3   0   68.90    7.48
  -4   3   0   63.40    6.17
  -4   3   0   67.69    6.45
  -4   3   0   54.92    7.45
  -5  -3   0   48.22    4.73
  -5  -3   0   54.64    5.61
  -5  -3   0   49.79    5.56
  -5   3   0   43.47    5.71
  -5   3   0   51.62    5.61
  -5   3   0   49.18    4.74
  -5   3   0   52.30    4.83
  -6   3   0   13.25    1.36
  -6   3   0   11.62    1.25
  -6   3   0   11.27    2.05
   7  -3   0    4.90    1.00
  -7   3   0    6.92    0.80
  -7   3   0    6.21    0.68
  -8   3   0   22.42    2.29
  -9   3   0   -0.18    0.36
   0  -4   0  726.70   66.62
   0   4   0  753.95   65.94
   1  -4   0   31.87    3.08
  -1  -4   0   32.22    3.09
  -1   4   0   34.27    3.15
  -1   4   0   32.61    3.07
   1   4   0   32.45    3.00
   1   4   0   35.08    3.14
   2  -4   0   17.88    1.87
  -2  -4   0   17.24    1.97
  -2  -4   0   18.58    1.71
  -2  -4   0   17.44    1.76
  -2   4   0   19.18    2.10
  -2   4   0   18.39    1.85
  -2   4   0   20.02    1.78
  -2   4   0   15.23    2.10
  -3  -4   0   25.56    2.73
  -3  -4   0   23.70    2.18
  -3  -4   0   20.90    2.39
  -3  -4   0   24.86    2.28
  -3  -4   0   25.70    2.22
  -3  -4   0   23.50    2.67
   3  -4   0   22.24    2.34
  -3   4   0   27.94    2.73
  -3   4   0   19.68    2.29
  -3   4   0   23.17    2.29
  -3   4   0   19.06    2.75
  -4  -4   0    0.66    0.29
  -4  -4   0    1.34    0.30
   4  -4   0    0.33    0.45
  -4  -4   0    1.06    0.24
  -4  -4   0    0.42    0.20
  -4   4   0    1.08    0.65
  -4   4   0    1.64    0.28
  -4   4   0    1.00    0.36
  -5  -4   0   94.16    9.19
  -5  -4   0  101.52   11.14
  -5  -4   0  108.70   11.00
  -5   4   0  113.41   11.22
  -5   4   0  103.18    9.68
  -5   4   0   89.67   11.14
  -5   4   0  101.22    9.59
  -6   4   0    2.09    1.09
  -6   4   0    1.34    0.28
  -6   4   0    1.39    0.37
   7  -4   0   58.38    7.05
  -7   4   0   63.79    5.99
  -7   4   0   65.27    6.02
  -8   4   0   11.65    1.28
  -8   4   0   11.02    1.16
  -9   4   0    4.33    0.65
  -9   4   0    5.33    0.77
   0  -5   0    0.30    0.13
   0   5   0    0.07    0.04
   0   5   0    0.03    0.08
   1  -5   0    4.10    0.46
  -1  -5   0    3.45    0.46
   1   5   0    3.26    0.35
  -1   5   0    3.14    0.35
  -1   5   0    3.17    0.47
   1   5   0    3.19    0.39
  -2  -5   0   76.21    6.99
   2  -5   0   68.94    7.16
  -2  -5   0   70.94    7.25
  -2   5   0   82.34    7.35
  -2   5   0   88.92    8.52
  -2   5   0   87.67    7.12
  -2   5   0   68.58    8.28
  -3  -5   0   12.94    1.52
  -3  -5   0   12.53    1.25
  -3  -5   0   12.63    1.22
  -3  -5   0   10.08    1.52
  -3  -5   0   14.62    1.67
  -3  -5   0   12.60    1.26
   3  -5   0   11.60    1.40
  -3   5   0   11.70    1.42
  -3   5   0   13.97    1.56
  -3   5   0    9.80    1.66
  -3   5   0   14.38    1.29
   4  -5   0   24.00    2.76
  -4  -5   0   28.49    2.59
  -4  -5   0   28.33    3.16
  -4  -5   0   24.27    2.82
  -4  -5   0   29.73    3.23
  -4   5   0   23.02    3.29
  -4   5   0   31.57    3.23
  -4   5   0   29.65    2.73
  -5  -5   0    0.13    0.26
  -5  -5   0    0.59    0.54
  -5   5   0    0.39    0.24
  -5   5   0    0.46    0.83
  -5   5   0    0.43    0.17
   5   5   0    0.11    0.25
  -5   5   0    0.81    0.39
   6  -5   0    2.26    0.57
  -6   5   0    1.26    1.10
  -6   5   0    2.55    0.49
  -6   5   0    2.31    0.37
   7  -5   0    6.95    1.24
  -7   5   0    8.02    0.91
  -7   5   0    7.64    0.83
  -8   5   0    3.87    0.53
  -8   5   0    4.56    0.66
  -9   5   0    1.17    0.35
  -9   5   0    0.51    0.42
 -10   5   0    2.20    0.50
   0  -6   0    3.37    0.39
   0   6   0    2.32    0.30
   0   6   0    2.50    0.34
  -1  -6   0    0.34    0.23
   1  -6   0    0.63    0.24
   1   6   0    0.46    0.13
  -1   6   0    0.77    0.13
   1   6   0    0.15    0.21
  -1   6   0    0.85    0.29
   2  -6   0   33.10    3.52
  -2  -6   0   38.54    3.41
  -2  -6   0   37.86    3.65
   2   6   0   39.60    3.57
  -2   6   0   39.14    3.58
  -2   6   0   37.46    3.52
   2   6   0   38.10    3.41
  -2   6   0   34.41    4.09
  -3  -6   0    8.05    1.11
   3  -6   0    5.31    0.84
  -3  -6   0    4.33    0.99
  -3  -6   0    6.31    0.66
  -3  -6   0    5.81    0.83
  -3   6   0    4.15    0.94
  -3   6   0    7.12    0.89
  -3   6   0    5.85    0.91
  -3   6   0    7.03    0.69
   4  -6   0   59.47    6.86
  -4  -6   0   74.33    8.12
  -4  -6   0   79.54    8.04
  -4  -6   0   71.60    6.69
  -4  -6   0   60.61    6.95
  -4   6   0   84.25    8.21
  -4   6   0   82.92    7.06
  -4   6   0   72.61    6.98
   4   6   0   77.54    7.03
  -5  -6   0   61.33    5.99
  -5  -6   0   68.78    6.33
  -5  -6   0   63.01    6.29
   5   6   0   71.00    6.01
  -5   6   0   67.77    6.23
  -5   6   0   69.42    6.32
  -5   6   0   51.72    7.33
   6  -6   0    6.22    0.94
  -6   6   0    4.73    1.56
  -6   6   0    4.02    0.56
   7  -6   0    0.11    0.43
  -7   6   0    0.31    0.27
  -7   6   0   -0.20    1.19
  -7   6   0    0.14    0.44
  -7   6   0   -0.01    0.16
  -8   6   0    4.05    0.56
  -8   6   0    3.70    0.42
  -8   6   0    4.68    0.66
  -8   6   0    3.75    0.52
  -9   6   0    0.97    0.34
  -9   6   0    0.46    0.39
 -10   6   0    2.18    0.50
   0  -7   0    0.28    0.18
   0   7   0    0.12    0.12
   0   7   0    0.15    0.06
  -1  -7   0    1.02    0.28
   1  -7   0    0.88    0.25
  -1   7   0    1.12    0.31
  -1   7   0    0.71    0.14
   1   7   0    0.59    0.16
  -2  -7   0  102.91    9.33
   2  -7   0   95.94    9.50
  -2  -7   0  104.95    9.61
   2  -7   0  105.16   11.34
  -2   7   0  108.93    9.45
  -2   7   0  107.32    9.82
   2   7   0  110.77    9.82
  -2   7   0   95.01   11.04
   2   7   0  105.35    9.34
  -3  -7   0    5.47    0.97
   3  -7   0    2.43    0.57
  -3  -7   0    3.37    0.44
  -3  -7   0    2.76    0.80
  -3  -7   0    3.03    0.58
  -3   7   0    3.24    0.74
   3   7   0    4.12    0.44
  -3   7   0    3.61    0.76
  -3   7   0    4.10    0.45
   3   7   0    3.38    0.45
  -4  -7   0    0.80    0.57
  -4  -7   0    0.96    0.27
   4  -7   0    0.56    0.43
  -4  -7   0    0.66    0.61
  -4   7   0    1.20    0.20
  -4   7   0    1.01    0.25
  -4   7   0    0.55    0.65
   4   7   0    1.11    0.28
  -5  -7   0   15.82    2.07
  -5  -7   0   16.18    1.71
   5  -7   0   17.08    2.11
  -5  -7   0   19.47    1.76
   5   7   0   18.51    1.73
  -5   7   0   12.72    2.35
  -5   7   0   17.15    1.71
  -5   7   0   17.50    1.79
   6  -7   0    0.20    0.36
  -6   7   0    0.05    1.02
  -6   7   0    0.19    0.17
   7  -7   0   11.11    1.56
  -7   7   0   10.29    2.28
  -7   7   0   10.10    1.08
  -7   7   0    7.51    1.22
  -7   7   0    9.76    1.02
  -8   7   0   81.62    8.08
  -8   7   0   86.73    7.74
  -8   7   0   81.10    7.03
  -8   7   0   75.13    7.68
  -9   7   0    1.93    0.35
  -9   7   0    2.07    0.42
  -9   7   0    1.96    0.49
 -10   7   0    0.71    0.41
   0  -8   0  582.85   50.79
   0   8   0  588.96   50.26
   0   8   0  521.59   52.87
   1  -8   0    3.10    0.55
  -1  -8   0    3.27    0.50
   1  -8   0    3.47    0.49
  -1  -8   0    3.71    0.40
  -1   8   0    3.22    0.57
   1   8   0    2.68    0.40
  -1   8   0    3.11    0.38
  -1   8   0    3.32    0.51
  -2  -8   0   -0.19    0.39
  -2  -8   0    0.41    0.17
   2  -8   0    0.62    0.28
   2  -8   0    0.60    0.32
  -2   8   0    0.32    0.14
  -2   8   0    0.62    0.35
   2   8   0    0.69    0.65
   2   8   0    0.62    0.30
   2   8   0    0.40    0.18
  -2   8   0    0.07    0.39
   3  -8   0   11.50    1.51
   3  -8   0   11.20    1.32
  -3  -8   0   13.78    1.66
  -3  -8   0   12.23    1.21
  -3   8   0   12.06    1.50
  -3   8   0   12.51    1.25
   3   8   0   13.17    1.22
  -3   8   0   11.06    1.60
   3   8   0   16.05    1.88
  -4  -8   0  124.83   12.10
  -4  -8   0  148.05   14.45
   4  -8   0  139.28   14.71
  -4   8   0  106.92   14.42
   4   8   0  139.28   12.12
  -4   8   0  141.25   12.75
  -4   8   0  140.65   12.67
  -5  -8   0   22.15    2.07
  -5  -8   0   19.04    2.00
  -5  -8   0   17.73    2.39
   5  -8   0   22.32    2.50
   5   8   0   22.45    2.02
  -5   8   0   19.98    2.09
  -5   8   0   21.21    2.02
  -5   8   0   14.82    2.71
  -6  -8   0   11.03    1.19
   6  -8   0    7.68    1.41
  -6   8   0    9.92    1.09
  -6   8   0   11.76    1.07
  -6   8   0    9.20    1.94
   7  -8   0   20.15    2.83
  -7   8   0   22.63    2.28
  -7   8   0   26.24    2.35
  -7   8   0   24.45    3.87
  -7   8   0   23.15    2.58
  -8   8   0    1.67    0.31
  -8   8   0    0.88    0.21
  -8   8   0    1.98    0.38
  -8   8   0    1.64    0.41
  -9   8   0    3.26    0.51
  -9   8   0    2.45    0.31
  -9   8   0    2.38    0.41
  -9   8   0    3.32    0.55
 -10   8   0    1.21    0.43
   0  -9   0   -0.03    0.20
   0   9   0    1.51    0.23
   0   9   0    0.04    0.28
   0   9   0    0.16    0.08
  -1  -9   0   19.27    1.87
   1  -9   0   19.10    2.21
  -1  -9   0   19.44    1.77
   1  -9   0   21.56    1.86
   1   9   0   16.85    1.77
  -1   9   0   18.67    1.84
  -1   9   0   19.88    2.16
   1   9   0   18.95    2.19
  -1   9   0   20.55    1.86
  -2  -9   0    6.31    0.64
   2  -9   0    4.97    0.73
  -2  -9   0    6.76    0.90
   2  -9   0    5.97    0.87
   2   9   0    7.02    1.15
   2   9   0    6.07    0.64
  -2   9   0    6.03    0.64
  -2   9   0    5.86    0.91
  -2   9   0    5.40    0.91
   3  -9   0    0.17    0.27
   3  -9   0    0.57    0.33
  -3  -9   0    0.26    0.19
  -3  -9   0    0.58    0.59
  -3   9   0    0.93    0.52
  -3   9   0    0.12    0.16
   3   9   0    0.41    0.70
  -3   9   0    0.92    0.46
   3   9   0    0.35    0.20
  -4  -9   0   23.94    3.26
   4  -9   0   35.03    3.63
   4  -9   0   26.07    3.03
  -4  -9   0   31.23    2.93
  -4  -9   0   30.85    3.06
   4   9   0   33.25    3.75
   4   9   0   32.56    2.94
  -4   9   0   34.54    3.01
  -4   9   0   29.87    3.74
  -4   9   0   31.73    3.07
  -5  -9   0    0.18    0.64
  -5  -9   0    0.14    0.43
   5  -9   0    0.46    0.35
  -5  -9   0    0.25    0.17
  -5  -9   0    0.15    0.28
  -5   9   0    0.42    0.25
  -5   9   0    0.90    0.83
  -5   9   0    0.81    0.20
   5   9   0    0.56    0.28
  -6  -9   0    0.63    0.37
   6  -9   0    1.36    0.53
  -6   9   0    0.83    0.23
  -6   9   0    0.55    0.22
  -6   9   0    3.25    1.19
   7  -9   0    0.50    0.57
  -7   9   0    1.14    0.27
  -7   9   0    0.82    1.47
  -7   9   0    0.45    0.43
  -7   9   0    0.76    0.31
  -8   9   0    0.68    0.25
  -8   9   0    1.09    0.33
  -8   9   0    0.17    0.32
  -8   9   0    0.10    0.15
  -8   9   0    0.45    0.55
  -9   9   0    0.30    0.32
  -9   9   0    0.70    0.19
  -9   9   0    0.97    0.27
  -9   9   0   -0.10    0.34
 -10   9   0    8.96    1.15
   0 -10   0   11.65    1.20
   0  10   0   11.48    1.15
   0  10   0   12.76    1.41
   0  10   0   12.13    1.16
   1 -10   0    0.38    0.31
  -1 -10   0    0.53    0.28
   1 -10   0    0.53    0.25
  -1 -10   0    0.39    0.15
  -1  10   0    0.93    0.34
   1  10   0    0.03    0.15
  -1  10   0    0.39    0.13
  -1  10   0    0.11    0.27
   1  10   0    0.54    0.34
  -2 -10   0    3.83    0.45
   2 -10   0    2.92    0.58
   2 -10   0    3.91    0.54
  -2 -10   0    3.42    0.64
  -2  10   0    3.26    0.75
  -2  10   0    3.75    0.42
   2  10   0    3.12    0.44
   2  10   0    2.37    0.74
  -2  10   0    3.98    0.69
  -3 -10   0   10.01    1.55
   3 -10   0   11.01    1.29
  -3 -10   0   11.80    1.20
   3 -10   0   11.93    1.52
   3  10   0   14.81    1.87
  -3  10   0   10.20    1.62
   3  10   0   14.16    1.22
  -3  10   0   12.15    1.23
   4 -10   0    0.87    0.38
  -4 -10   0    0.62    0.26
  -4 -10   0   -0.19    0.62
  -4 -10   0    0.98    0.21
   4 -10   0    0.94    0.40
  -4 -10   0    0.56    0.49
  -4  10   0    1.10    0.67
   4  10   0    1.20    0.29
  -4  10   0    0.43    0.17
  -4  10   0    0.56    0.24
  -5 -10   0    8.58    1.01
  -5 -10   0    9.24    0.97
   5 -10   0    7.99    1.30
  -5 -10   0    6.21    1.38
  -5 -10   0    7.05    1.21
   5  10   0    9.38    1.00
  -5  10   0   10.68    0.95
  -5  10   0    8.83    1.01
  -5  10   0    6.60    1.59
  -6 -10   0   10.67    1.08
  -6 -10   0    8.74    0.92
  -6 -10   0    9.90    1.19
   6 -10   0   10.82    1.53
  -6  10   0    8.73    1.82
  -6  10   0   10.74    1.05
  -6  10   0   10.09    1.02
  -6  10   0    7.67    1.14
   7 -10   0    6.97    1.33
  -7  10   0   10.58    1.00
  -7  10   0    7.18    1.11
  -7  10   0    8.60    0.94
  -7  10   0    7.49    2.01
  -8  10   0    1.48    0.24
  -8  10   0    1.19    0.39
  -8  10   0    0.71    0.57
  -8  10   0    1.13    0.30
  -8  10   0    1.81    0.38
  -9  10   0    4.65    0.67
  -9  10   0    4.83    0.61
  -9  10   0    4.60    0.52
 -10  10   0    0.24    0.40
   0 -11   0    0.68    0.16
   0 -11   0    0.07    0.21
   0 -11   0    0.28    0.37
   0  11   0    0.23    0.26
   0  11   0   -0.04    0.18
   0  11   0   -0.01    0.07
  -1 -11   0    0.36    0.29
  -1 -11   0    1.19    0.22
   1 -11   0    1.09    0.39
   1 -11   0    1.15    0.30
   1  11   0    1.27    0.40
  -1  11   0    0.89    0.36
   1  11   0    0.72    0.21
  -1  11   0    0.72    0.31
  -1  11   0    1.07    0.18
   2 -11   0   34.73    3.83
   2 -11   0   31.76    3.18
  -2 -11   0   35.99    3.29
  -2 -11   0   35.78    3.09
   2  11   0   35.35    3.10
   2  11   0   33.71    3.78
  -2  11   0   25.65    3.19
  -2  11   0   33.40    3.23
  -2  11   0   36.01    3.76
  -3 -11   0  126.18   12.28
   3 -11   0  137.86   14.94
  -3 -11   0  142.13   12.70
   3 -11   0  131.12   12.47
   3  11   0  144.85   12.30
   3  11   0  146.46   14.64
  -3  11   0  138.05   12.91
  -3  11   0  131.49   14.58
  -4 -11   0    8.78    1.05
  -4 -11   0   10.53    1.04
  -4 -11   0    9.32    1.33
   4 -11   0    9.87    1.35
   4 -11   0    8.67    1.16
  -4 -11   0    9.41    1.53
  -4  11   0    9.83    1.07
  -4  11   0    8.03    1.54
   4  11   0   11.62    1.07
  -4  11   0   10.29    1.01
  -5 -11   0   14.53    2.24
   5 -11   0   22.25    2.51
  -5 -11   0   21.03    2.01
  -5 -11   0   21.38    2.05
  -5 -11   0   13.87    2.35
   5  11   0   19.67    2.00
  -5  11   0   21.85    2.00
  -5  11   0   21.14    2.08
  -5  11   0   21.11    3.03
  -6 -11   0   18.80    1.97
  -6 -11   0   22.29    1.99
   6 -11   0   19.15    2.44
  -6 -11   0   18.69    1.77
  -6  11   0   20.15    1.93
  -6  11   0   21.16    1.92
  -6  11   0   14.56    2.04
  -6  11   0   19.13    2.91
   7 -11   0    5.60    1.14
  -7  11   0    7.02    0.73
  -7  11   0    3.89    0.80
  -7  11   0    7.49    0.82
  -7  11   0    4.42    1.64
  -8  11   0   21.09    2.65
  -8  11   0   23.95    2.41
  -8  11   0   21.75    2.34
  -8  11   0   26.02    2.13
  -8  11   0   22.90    2.53
  -8  11   0   24.57    2.48
  -9  11   0   -0.35    0.30
  -9  11   0    0.78    0.27
  -9  11   0    0.06    0.17
 -10  11   0    3.56    0.61
   0 -12   0  315.64   27.39
   0 -12   0  300.33   27.04
   0  12   0  281.08   27.08
   0  12   0  317.65   31.83
   1 -12   0   91.22   10.10
   1 -12   0   93.34    8.41
  -1 -12   0   93.09    8.26
  -1 -12   0   97.10    8.44
  -1  12   0   84.00    8.66
  -1  12   0   92.94    8.35
   1  12   0   92.83    8.28
  -1  12   0   93.53    9.78
   1  12   0   92.63    9.77
   2 -12   0   30.90    3.39
  -2 -12   0   32.28    2.73
  -2 -12   0   31.34    2.92
   2 -12   0   29.13    2.81
   2  12   0   29.13    2.73
   2  12   0   28.19    3.32
  -2  12   0   23.46    2.81
  -2  12   0   28.70    2.83
  -2  12   0   31.55    3.33
  -3 -12   0  148.69   13.73
  -3 -12   0  151.09   14.57
  -3 -12   0  153.39   14.13
   3 -12   0  156.78   16.70
   3 -12   0  146.97   13.92
   3  12   0  164.20   13.74
  -3  12   0  147.49   16.27
   3  12   0  154.75   16.29
  -3  12   0  153.61   14.43
  -4 -12   0   12.32    1.24
  -4 -12   0   12.85    1.25
  -4 -12   0   10.37    1.63
  -4 -12   0   10.23    1.47
   4 -12   0   11.28    1.58
   4  12   0   12.25    1.25
  -4  12   0    9.83    1.77
  -4  12   0   12.18    1.20
  -4  12   0   12.33    1.27
  -5 -12   0    3.29    0.50
   5 -12   0    4.49    0.87
  -5 -12   0    2.09    0.75
  -5 -12   0    1.60    1.00
  -5 -12   0    6.11    0.69
  -5  12   0    3.91    0.60
  -5  12   0    3.77    0.48
   5  12   0    3.62    0.60
  -5  12   0    3.28    1.20
  -6 -12   0    4.68    0.81
   6 -12   0    7.28    1.17
  -6 -12   0    6.09    0.62
  -6 -12   0    7.28    0.77
  -6  12   0    6.27    0.71
  -6  12   0    6.97    0.73
  -6  12   0    4.04    0.76
  -6  12   0    5.32    1.43
   7 -12   0    0.70    0.60
  -7  12   0    0.49    0.28
  -7  12   0   -0.15    0.97
  -7  12   0   -0.02    0.32
  -7  12   0    0.31    0.24
  -8  12   0    1.90    0.64
  -8  12   0    2.38    0.48
  -8  12   0    1.81    0.59
  -8  12   0    2.16    0.30
  -8  12   0    2.72    0.41
  -8  12   0    1.93    0.42
  -9  12   0    1.58    0.35
  -9  12   0    1.89    0.30
  -9  12   0    2.33    0.47
 -10  12   0    0.27    0.40
   0 -13   0    0.21    0.25
   0 -13   0    0.62    0.45
   0 -13   0   -0.11    0.13
   0  13   0    0.32    0.30
   0  13   0    0.09    0.21
  -1 -13   0   56.84    5.20
   1 -13   0   44.95    3.92
   1 -13   0   40.68    4.72
  -1 -13   0   41.30    3.80
  -1 -13   0   41.37    3.93
   1  13   0   39.34    4.52
  -1  13   0   41.93    3.90
  -1  13   0   42.95    4.57
   1  13   0   41.54    3.83
  -1  13   0   38.57    3.96
   2 -13   0   22.35    2.12
  -2 -13   0   23.38    2.03
   2 -13   0   22.28    2.58
  -2 -13   0   21.10    2.21
  -2  13   0   20.32    2.09
   2  13   0   21.80    2.04
  -2  13   0   21.54    2.51
  -2  13   0   20.07    2.14
   2  13   0   20.13    2.48
  -3 -13   0   47.60    4.99
   3 -13   0   49.93    4.71
  -3 -13   0   52.45    4.93
   3 -13   0   51.11    5.67
  -3 -13   0   50.07    4.84
  -3 -13   0   54.49    4.62
   3  13   0   47.05    5.55
  -3  13   0   47.44    5.57
   3  13   0   49.08    4.61
  -3  13   0   52.03    4.82
  -4 -13   0   13.28    1.23
   4 -13   0   12.74    1.62
  -4 -13   0   13.46    1.73
  -4 -13   0   11.33    1.21
  -4 -13   0   13.29    1.49
  -4  13   0   10.92    1.16
   4  13   0   11.54    1.21
  -4  13   0   10.90    1.79
  -4  13   0   10.29    1.22
   5 -13   0    7.09    1.09
  -5 -13   0    4.20    1.12
  -5 -13   0    5.55    0.67
  -5 -13   0    4.38    0.92
  -5 -13   0    5.01    0.72
   5  13   0    5.00    0.74
  -5  13   0    4.96    0.59
  -5  13   0    3.82    1.22
  -5  13   0    4.85    0.71
   6 -13   0    1.01    0.56
  -6 -13   0    1.74    0.35
  -6 -13   0    0.86    0.20
  -6 -13   0    0.44    0.39
  -6  13   0    0.94    0.34
  -6  13   0    0.73    0.25
  -6  13   0    0.15    0.96
  -6  13   0    1.19    0.28
   7 -13   0    0.24    0.55
  -7 -13   0    0.38    0.20
  -7  13   0    0.03    0.26
  -7  13   0   -0.42    0.99
  -7  13   0    0.07    0.30
  -7  13   0    0.06    0.25
  -8  13   0    0.45    0.32
  -8  13   0    0.47    0.25
  -8  13   0    0.06    0.40
  -8  13   0    0.26    0.31
  -8  13   0    0.19    0.16
  -8  13   0    0.47    0.48
  -9  13   0    1.07    0.25
  -9  13   0    1.46    0.33
  -9  13   0    0.95    0.39
   0 -14   0   24.79    3.67
   0 -14   0   32.60    2.91
   0 -14   0   34.55    3.04
   0  14   0   32.54    2.98
   0  14   0   33.30    3.52
   1 -14   0   25.96    2.43
  -1 -14   0   25.00    2.33
  -1 -14   0   24.05    2.45
   1 -14   0   26.11    2.97
   1  14   0   23.92    2.81
   1  14   0   23.40    2.35
  -1  14   0   28.22    2.47
  -1  14   0   25.61    2.84
   2 -14   0   34.60    3.16
  -2 -14   0   33.03    3.05
  -2 -14   0   36.66    3.27
   2 -14   0   33.25    3.82
  -2 -14   0   34.45    3.21
  -2  14   0   32.41    3.18
   2  14   0   30.49    3.66
  -2  14   0   36.34    3.74
   2  14   0   30.78    3.06
  -2  14   0   30.64    3.17
   3 -14   0    0.69    0.42
  -3 -14   0    0.55    0.54
   3 -14   0    0.23    0.32
  -3 -14   0    0.25    0.17
  -3 -14   0    1.05    0.43
   3 -14   0    0.37    0.27
  -3 -14   0    0.37    0.24
   3  14   0    0.86    0.56
  -3  14   0    0.42    0.16
  -3  14   0    0.22    0.49
   3  14   0    0.29    0.23
  -3  14   0    0.32    0.20
  -4 -14   0   23.38    2.32
  -4 -14   0   25.90    2.65
  -4 -14   0   22.85    2.52
   4 -14   0   24.00    2.84
  -4 -14   0   25.49    2.27
   4  14   0   22.46    2.25
  -4  14   0   20.06    2.31
  -4  14   0   25.35    2.99
  -4  14   0   23.69    2.25
  -5 -14   0   23.37    2.80
  -5 -14   0   28.53    3.00
   5 -14   0   27.34    3.15
  -5 -14   0   27.46    2.59
  -5 -14   0   26.26    2.52
  -5  14   0   24.27    2.51
  -5  14   0   25.23    3.46
  -6 -14   0    0.90    0.21
   6 -14   0    0.44    0.53
  -6 -14   0    1.06    0.45
  -6 -14   0    1.80    0.36
  -6  14   0    0.89    0.28
  -6  14   0    0.87    0.35
  -6  14   0    0.98    1.04
  -6  14   0    1.29    0.28
  -7 -14   0    0.59    0.21
  -7  14   0   -0.28    0.30
  -7  14   0    0.84    0.29
  -7  14   0    0.33    0.28
  -8  14   0    0.80    0.48
  -8  14   0    0.77    0.35
  -8  14   0    1.30    0.47
  -8  14   0    1.07    0.33
  -8  14   0    0.98    0.38
  -8  14   0    1.20    0.23
  -9  14   0    1.23    0.65
  -9  14   0    1.34    0.43
  -9  14   0    1.24    0.33
  -9  14   0    1.43    0.27
   0 -15   0    0.24    0.24
   0 -15   0   -0.43    0.41
   0 -15   0    0.01    0.15
   0  15   0    0.52    0.32
   0  15   0   -0.11    0.21
  -1 -15   0   14.83    1.48
  -1 -15   0   14.67    1.60
   1 -15   0   14.52    1.98
   1 -15   0   16.87    1.59
   1  15   0   14.25    1.81
   1  15   0   16.14    1.53
  -1  15   0   17.19    1.63
  -1  15   0   15.92    1.88
   2 -15   0   58.09    6.33
  -2 -15   0   56.47    5.12
  -2 -15   0   58.37    5.34
  -2 -15   0   55.86    5.50
   2 -15   0   54.22    5.23
  -2 -15   0   59.92    5.41
  -2  15   0   59.56    6.15
  -2  15   0   58.12    5.25
   2  15   0   48.24    6.05
   2  15   0   56.00    5.13
  -2  15   0   54.12    5.34
  -3 -15   0  135.29   12.70
   3 -15   0  131.04   12.15
  -3 -15   0  140.47   11.99
  -3 -15   0  136.39   12.37
   3 -15   0  132.05   14.61
  -3 -15   0  131.03   12.86
   3 -15   0  128.35   12.74
   3  15   0  132.93   11.99
  -3  15   0  140.04   14.27
  -3  15   0  127.92   12.50
  -3  15   0  132.10   12.58
  -4 -15   0   -0.01    0.62
  -4 -15   0    0.16    0.44
  -4 -15   0    1.52    0.38
   4 -15   0    0.34    0.46
  -4 -15   0    0.43    0.19
  -4  15   0    0.03    0.61
   4  15   0    0.11    0.26
  -4  15   0    0.58    0.18
  -4  15   0    0.47    0.25
  -5 -15   0  108.37   11.59
  -5 -15   0  118.28   10.55
  -5 -15   0  119.72   10.82
   5 -15   0  123.04   13.19
  -5 -15   0  129.75   11.43
  -5  15   0  107.49   11.83
  -5  15   0  124.22   13.15
  -5  15   0  128.79   11.30
  -5  15   0  113.83   11.23
  -6 -15   0    4.74    0.52
   6 -15   0    3.45    0.91
  -6 -15   0    5.57    0.69
  -6 -15   0    4.26    0.75
  -6  15   0    4.56    0.71
  -6  15   0    4.15    1.42
  -6  15   0    4.91    0.62
  -6  15   0    3.44    0.55
  -7 -15   0    3.21    0.42
  -7  15   0    3.01    0.37
  -7  15   0    2.00    0.54
  -7  15   0    3.28    0.50
  -7  15   0    3.75    0.54
  -7  15   0    2.80    0.56
  -8  15   0    0.35    0.41
  -8  15   0    0.79    0.37
  -8  15   0   -0.02    0.40
  -8  15   0    1.20    0.23
  -8  15   0    1.29    0.41
  -8  15   0    0.87    0.33
  -9  15   0    4.18    0.79
  -9  15   0    4.47    0.68
  -9  15   0    4.85    0.62
  -9  15   0    4.52    0.79
  -9  15   0    4.46    0.52
   0 -16   0  306.54   28.06
   0 -16   0  287.07   27.68
   0 -16   0  327.71   29.56
   0  16   0  335.71   27.78
   0  16   0  296.46   32.59
   1 -16   0   12.87    1.31
  -1 -16   0   12.40    1.21
  -1 -16   0   11.19    1.30
   1 -16   0    9.72    1.65
   1 -16   0   12.90    1.31
  -1 -16   0   11.79    1.25
  -1 -16   0   12.58    1.34
   1  16   0   11.87    1.49
   1  16   0   12.33    1.26
  -1  16   0   12.07    1.54
  -1  16   0   15.59    1.40
  -2 -16   0  198.47   17.63
  -2 -16   0  190.37   18.83
   2 -16   0  206.75   18.79
   2 -16   0  198.63   17.87
   2 -16   0  195.27   21.47
  -2 -16   0  216.78   18.74
  -2 -16   0  190.69   17.95
   2  16   0  192.62   17.65
   2  16   0  172.33   20.73
  -2  16   0  203.25   20.83
  -3 -16   0   24.67    2.26
   3 -16   0   23.34    2.36
   3 -16   0   22.20    2.32
  -3 -16   0   25.00    2.52
   3 -16   0   23.02    2.85
  -3 -16   0   24.25    2.57
  -3 -16   0   22.31    2.32
   3  16   0   23.68    2.26
  -3  16   0   23.30    2.32
  -3  16   0   26.34    2.89
  -3  16   0   22.52    2.25
  -4 -16   0   48.83    4.62
  -4 -16   0   49.57    4.24
  -4 -16   0   45.17    4.41
   4 -16   0   50.99    5.28
  -4 -16   0   43.87    4.58
  -4  16   0   41.37    4.39
  -4  16   0   45.96    5.26
  -4  16   0   42.86    4.32
  -5 -16   0    1.33    0.24
  -5 -16   0    2.23    0.39
  -5 -16   0    1.83    0.45
   5 -16   0    1.82    0.65
  -5 -16   0    1.91    0.66
  -5  16   0    1.29    0.40
  -5  16   0    1.66    0.33
  -5  16   0    1.68    0.31
  -5  16   0    1.89    1.06
  -6 -16   0   -0.04    0.37
  -6 -16   0    0.22    0.17
   6 -16   0    0.21    0.52
  -6 -16   0    0.33    0.28
  -6  16   0    0.57    0.34
  -6  16   0    0.68    0.99
  -6  16   0    0.14    0.24
  -6  16   0    0.09    0.23
  -7 -16   0    6.32    0.69
  -7 -16   0    6.02    0.71
  -7  16   0    7.95    0.70
  -7  16   0    7.14    0.84
  -7  16   0    5.75    0.88
  -7  16   0    5.77    0.91
  -7  16   0    8.44    0.92
  -7  16   0    6.79    0.84
  -8 -16   0    1.31    0.30
  -8  16   0    1.54    0.38
  -8  16   0    1.31    0.46
  -8  16   0    1.61    0.44
  -8  16   0    1.61    0.27
  -8  16   0    1.27    0.46
  -8  16   0    1.18    0.40
  -9  16   0    1.07    0.45
  -9  16   0    0.69    0.47
  -9  16   0    0.95    0.25
  -9  16   0    0.58    0.30
  -9  16   0    0.24    0.45
   0 -17   0    0.24    0.29
   0 -17   0   -0.25    0.21
   0  17   0   -0.08    0.30
   0  17   0    0.22    0.19
   0  17   0    0.28    0.28
   1 -17   0  316.44   27.37
  -1 -17   0  304.10   27.38
   1 -17   0  291.05   25.99
  -1 -17   0  276.27   26.01
  -1 -17   0  282.90   25.64
   1 -17   0  270.59   31.18
   1  17   0  277.16   25.69
   1  17   0  275.52   30.16
  -1  17   0  287.14   30.21
   2 -17   0    0.39    0.31
  -2 -17   0    0.56    0.29
  -2 -17   0    0.82    0.33
   2 -17   0    0.78    0.27
   2 -17   0    0.70    0.49
  -2 -17   0    1.06    0.46
  -2 -17   0    0.38    0.19
  -2  17   0    0.68    0.48
   2  17   0    0.14    0.25
   2  17   0    0.44    0.38
  -3 -17   0   20.24    2.19
   3 -17   0   18.50    2.03
  -3 -17   0   21.43    1.98
   3 -17   0   21.48    2.06
  -3 -17   0   19.38    2.02
   3 -17   0   20.98    2.56
  -3 -17   0   19.96    2.27
  -3  17   0   20.82    2.55
   3  17   0   18.74    1.97
   4 -17   0   17.64    2.24
  -4 -17   0   16.58    1.96
  -4 -17   0   16.79    1.74
  -4 -17   0   17.22    2.20
  -4 -17   0   18.03    1.74
  -4  17   0   19.26    2.40
   4  17   0   16.62    1.74
  -4  17   0   16.77    1.68
  -4  17   0   15.90    1.76
  -5 -17   0    7.58    0.86
  -5 -17   0    5.92    1.05
  -5 -17   0    7.27    0.72
   5 -17   0    7.96    1.29
  -5 -17   0    6.65    0.94
  -5  17   0    6.95    0.80
  -5  17   0    6.54    0.92
  -5  17   0    6.99    0.81
  -5  17   0    6.94    1.65
   6 -17   0   -0.26    0.52
  -6 -17   0   -0.09    0.40
  -6 -17   0    0.00    0.16
  -6 -17   0    0.26    0.27
  -6  17   0    0.80    0.29
  -6  17   0   -0.01    0.30
  -6  17   0    0.36    0.25
  -6  17   0    0.23    1.10
  -7 -17   0    1.70    0.30
  -7 -17   0    2.52    0.46
  -7 -17   0    1.55    0.30
  -7  17   0    0.95    0.45
  -7  17   0    2.32    0.30
  -7  17   0    1.73    0.44
  -7  17   0    2.67    0.45
  -7  17   0    1.04    0.41
  -7  17   0    1.69    0.40
  -8 -17   0    0.99    0.24
  -8 -17   0    0.57    0.24
  -8  17   0    0.28    0.37
  -8  17   0   -0.16    0.35
  -8  17   0    0.75    0.40
  -8  17   0    0.50    0.32
  -8  17   0    0.55    0.34
  -8  17   0    0.28    0.19
  -9  17   0   -0.04    0.43
  -9  17   0    0.23    0.29
  -9  17   0   -0.14    0.39
  -9  17   0    0.66    0.44
  -9  17   0    0.54    0.23
   0 -18   0   60.98    5.81
   0 -18   0   65.40    6.05
   0  18   0   58.66    6.02
   0  18   0   60.58    6.73
   0  18   0   66.74    5.76
   1 -18   0   23.42    3.18
  -1 -18   0   25.94    2.62
   1 -18   0   27.30    2.64
  -1 -18   0   28.40    2.67
  -1 -18   0   23.84    2.46
   1 -18   0   25.56    2.58
  -1  18   0   28.07    2.69
  -1  18   0   26.42    3.02
   1  18   0   24.65    2.97
   1  18   0   25.49    2.52
  -1  18   0   32.10    2.70
  -2 -18   0    5.32    0.90
   2 -18   0    5.73    0.82
  -2 -18   0    4.74    0.78
   2 -18   0    6.25    1.12
  -2 -18   0    6.32    0.74
  -2 -18   0    5.94    0.70
   2 -18   0    6.00    0.75
  -2  18   0    6.53    1.10
   2  18   0    5.72    0.76
   2  18   0    5.70    0.95
  -3 -18   0    2.15    0.44
   3 -18   0    1.68    0.37
   3 -18   0    1.68    0.63
  -3 -18   0    0.77    0.61
   3 -18   0    1.52    0.45
  -3 -18   0    1.52    0.31
  -3 -18   0    2.05    0.54
  -3  18   0    2.57    0.78
   3  18   0    1.15    0.37
   4 -18   0   13.71    1.80
  -4 -18   0   13.66    1.16
  -4 -18   0   11.70    1.31
  -4 -18   0   12.96    1.60
  -4 -18   0   14.02    1.36
  -4  18   0   10.70    1.35
  -4  18   0   11.11    1.08
  -4  18   0   14.20    2.06
  -4  18   0   12.19    1.26
  -5 -18   0   70.21    6.97
  -5 -18   0   71.08    6.79
  -5 -18   0   71.08    6.49
   5 -18   0   70.21    7.96
  -5 -18   0   69.76    6.24
  -5  18   0   69.72    6.66
  -5  18   0   63.28    7.03
  -5  18   0   73.53    6.70
  -5  18   0   74.66    8.10
  -6 -18   0    5.20    0.56
   6 -18   0    3.87    1.00
  -6 -18   0    5.50    0.72
  -6  18   0    4.71    0.73
  -6  18   0    4.82    0.66
  -6  18   0    5.40    0.67
  -6  18   0    4.61    1.44
  -7 -18   0    1.90    0.31
  -7 -18   0    1.49    0.23
  -7 -18   0    2.10    0.43
  -7 -18   0    1.71    0.30
  -7  18   0    1.77    0.40
  -7  18   0    0.64    0.39
  -7  18   0    1.09    0.37
  -7  18   0    2.40    0.48
  -7  18   0    1.62    0.26
  -7  18   0    0.82    0.42
  -8 -18   0    0.75    0.23
  -8 -18   0    0.28    0.23
  -8  18   0    0.18    0.32
  -8  18   0    0.42    0.21
  -8  18   0    0.13    0.36
  -8  18   0    0.84    0.40
  -8  18   0    0.30    0.39
  -9  18   0    0.36    0.43
  -9  18   0    0.99    0.25
  -9  18   0    1.08    0.33
  -9  18   0   -0.27    0.38
  -9  18   0    0.60    0.44
   0 -19   0   -0.09    0.30
   0 -19   0    0.30    0.24
   0  19   0    0.01    0.19
   0  19   0    0.11    0.32
   0  19   0    0.10    0.35
   1 -19   0   48.38    6.67
   1 -19   0   57.68    5.56
  -1 -19   0   60.93    5.79
  -1 -19   0   59.45    5.60
  -1 -19   0   57.89    5.41
   1 -19   0   64.28    5.78
   1  19   0   56.28    5.74
   1  19   0   57.58    5.47
   1  19   0   58.13    6.43
  -1  19   0   66.43    5.62
  -1  19   0   65.99    5.82
  -1  19   0   60.23    6.48
  -2 -19   0   50.81    5.25
   2 -19   0   57.21    5.21
  -2 -19   0   58.05    4.92
   2 -19   0   52.04    5.02
  -2 -19   0   58.15    5.18
   2 -19   0   49.43    6.08
  -2 -19   0   49.51    5.10
   2  19   0   48.87    4.93
  -2  19   0   55.79    5.92
   2  19   0   50.54    5.80
  -3 -19   0   43.50    4.46
   3 -19   0   37.40    4.19
   3 -19   0   52.00    5.23
  -3 -19   0   50.42    4.17
   3 -19   0   44.38    4.35
  -3 -19   0   41.47    4.31
  -3 -19   0   40.98    4.41
  -3  19   0   49.08    5.11
  -4 -19   0    0.03    0.13
  -4 -19   0   -0.11    0.30
  -4 -19   0    0.26    0.45
  -4 -19   0    0.16    0.21
   4 -19   0   -0.09    0.51
  -4  19   0    0.00    0.18
  -4  19   0    0.49    0.28
  -4  19   0    0.51    0.27
  -4  19   0   -0.42    0.64
  -5 -19   0   48.14    4.34
  -5 -19   0   48.22    4.93
  -5 -19   0   47.87    4.58
   5 -19   0   46.91    5.65
  -5 -19   0   53.92    4.76
  -5  19   0   48.90    4.68
  -5  19   0   44.65    4.92
  -5  19   0   49.44    4.65
  -5  19   0   45.41    5.79
  -6 -19   0    0.35    0.20
  -6 -19   0    0.48    0.30
  -6  19   0    0.50    0.31
  -6  19   0    0.37    0.33
  -6  19   0    0.21    0.26
  -7 -19   0   28.47    2.88
  -7 -19   0   36.15    2.89
  -7 -19   0   34.51    3.30
  -7 -19   0   29.28    2.98
  -7  19   0   29.75    3.40
  -7  19   0   32.68    3.23
  -7  19   0   28.33    3.16
  -7  19   0   34.38    3.24
  -7  19   0   37.46    2.93
  -7  19   0   39.98    3.43
  -8 -19   0    7.17    0.76
  -8 -19   0    6.61    0.78
  -8  19   0    9.18    1.04
  -8  19   0    8.50    0.79
  -8  19   0    7.55    0.92
  -8  19   0    7.19    0.94
  -8  19   0    7.74    1.00
  -9  19   0    0.08    0.22
  -9  19   0   -0.73    0.35
  -9  19   0   -0.32    0.42
  -9  19   0   -0.46    0.33
   0 -20   0   84.03    7.71
   0 -20   0   73.52    7.38
   0  20   0   79.74    8.57
   0  20   0   78.84    7.68
   0  20   0   81.41    7.34
   1 -20   0    0.63    0.28
  -1 -20   0    0.10    0.37
  -1 -20   0    0.69    0.27
   1 -20   0    0.89    0.39
  -1 -20   0    0.43    0.29
   1  20   0    0.52    0.24
   1  20   0    1.18    0.39
   1  20   0    0.49    0.41
  -1  20   0    1.17    0.39
  -1  20   0    0.52    0.44
  -1  20   0    1.11    0.56
  -2 -20   0   26.22    3.06
   2 -20   0   34.10    3.08
   2 -20   0   28.74    3.00
   2 -20   0   33.09    3.75
  -2 -20   0   33.54    2.92
  -2 -20   0   27.76    3.10
   2  20   0   29.64    2.95
  -2  20   0   31.94    3.58
   3 -20   0   10.57    1.77
   3 -20   0   11.48    1.30
  -3 -20   0   12.25    1.52
   3 -20   0   11.10    1.41
  -3 -20   0   11.90    1.28
  -3 -20   0   13.61    1.31
  -3  20   0   13.31    1.91
  -4 -20   0    5.99    0.57
  -4 -20   0    3.93    0.74
   4 -20   0    4.89    1.07
  -4 -20   0    4.52    0.88
  -4 -20   0    5.28    0.71
  -4  20   0    5.72    0.69
  -4  20   0    4.80    0.71
  -4  20   0    4.13    1.20
  -4  20   0    5.40    0.55
  -5 -20   0    3.25    0.55
   5 -20   0    2.58    0.83
  -5 -20   0    3.60    0.78
  -5 -20   0    3.22    0.66
  -5 -20   0    3.16    0.41
  -5  20   0    4.37    1.36
  -5  20   0    2.85    0.57
  -5  20   0    3.70    0.54
  -5  20   0    3.65    0.51
  -6 -20   0    7.70    0.74
  -6 -20   0    6.31    0.69
  -6 -20   0    6.87    0.75
  -6 -20   0    7.82    0.91
  -6  20   0    7.47    0.72
  -6  20   0    7.34    0.87
  -6  20   0    7.53    0.89
  -6  20   0    7.16    0.98
  -6  20   0    7.68    0.96
  -7 -20   0    0.19    0.23
  -7 -20   0    0.27    0.15
  -7 -20   0    0.03    0.21
  -7  20   0    0.21    0.37
  -7  20   0    0.11    0.19
  -7  20   0   -0.23    0.37
  -7  20   0    0.25    0.35
  -7  20   0    0.42    0.34
  -7  20   0   -0.18    0.28
  -8 -20   0    2.11    0.34
  -8 -20   0    2.30    0.35
  -8  20   0    1.48    0.43
  -8  20   0    2.20    0.50
  -8  20   0    2.59    0.55
  -8  20   0    1.33    0.46
  -8  20   0    2.21    0.33
  -9  20   0   -1.18    0.32
  -9  20   0    0.15    0.22
   0 -21   0    0.36    0.27
   0 -21   0    0.14    0.33
   0  21   0   -0.27    0.38
   0  21   0    0.11    0.25
   0  21   0    0.59    0.43
   1 -21   0   32.02    3.42
  -1 -21   0   32.42    3.47
   1 -21   0   36.49    3.52
  -1 -21   0   39.11    3.56
   1  21   0   35.35    3.40
   1  21   0   35.83    3.50
   1  21   0   33.72    3.95
  -1  21   0   36.91    4.03
   2 -21   0    0.36    0.60
  -2 -21   0    0.55    0.34
  -2 -21   0    0.75    0.46
   2 -21   0    0.38    0.37
   2 -21   0    0.17    0.25
  -2 -21   0    0.30    0.29
  -2  21   0    0.61    0.56
   2  21   0    0.47    0.33
  -3 -21   0   11.67    1.31
   3 -21   0   10.87    1.31
  -3 -21   0   13.24    1.13
  -3 -21   0   12.43    1.29
   3 -21   0   12.61    1.89
  -3 -21   0    9.09    1.41
  -3  21   0   12.30    1.05
  -3  21   0   12.69    1.86
  -3  21   0   11.74    1.32
  -4 -21   0    2.25    0.67
   4 -21   0    2.88    0.92
  -4 -21   0    3.90    0.44
  -4 -21   0    5.60    0.76
  -4 -21   0    3.93    0.57
  -4  21   0    3.43    0.42
  -4  21   0    3.21    0.55
  -4  21   0    3.99    0.57
  -4  21   0    2.25    1.02
   5 -21   0    0.18    0.61
  -5 -21   0    0.42    0.29
  -5 -21   0    0.52    0.20
  -5 -21   0   -0.02    0.52
  -5 -21   0    0.46    0.44
  -5  21   0    1.23    1.02
  -5  21   0    0.22    0.32
  -5  21   0   -0.06    0.28
  -6 -21   0    1.41    0.68
  -6 -21   0    1.41    0.39
  -6 -21   0    1.29    0.23
  -6 -21   0    1.73    0.31
  -6 -21   0    2.44    0.33
  -6  21   0    0.93    0.40
  -6  21   0    2.62    0.33
  -6  21   0    1.28    0.47
  -6  21   0    1.09    0.43
  -6  21   0    1.64    0.48
  -6  21   0    1.05    0.37
  -7 -21   0    0.77    0.26
  -7 -21   0    0.42    0.24
  -7 -21   0    0.49    0.16
  -7  21   0    1.26    0.42
  -7  21   0    0.27    0.42
  -7  21   0    0.73    0.35
  -7  21   0    1.07    0.40
  -7  21   0    0.81    0.23
  -7  21   0    1.36    0.41
  -8 -21   0    0.40    0.23
  -8 -21   0    0.42    0.22
  -8  21   0    0.16    0.34
  -8  21   0    0.24    0.36
  -8  21   0    0.29    0.45
  -8  21   0    0.23    0.20
  -8  21   0   -0.01    0.33
   0 -22   0    0.10    0.27
   0 -22   0    0.26    0.38
   0  22   0    0.63    0.31
   0  22   0    0.07    0.40
   0  22   0    0.17    0.42
   1 -22   0    1.47    0.48
  -1 -22   0    1.05    0.51
   1 -22   0    1.28    0.36
  -1 -22   0    1.49    0.42
   1  22   0    1.23    0.51
   1  22   0    1.66    0.49
   1  22   0    1.54    0.35
  -1  22   0    2.62    0.70
   2 -22   0    0.04    0.26
  -2 -22   0   -0.06    0.27
  -2 -22   0    0.36    0.14
   2 -22   0    0.21    0.39
   2 -22   0   -1.02    0.53
  -2 -22   0    0.32    0.34
   2  22   0    0.07    0.23
  -2  22   0   -0.02    0.53
  -3 -22   0   -0.07    0.38
  -3 -22   0    0.30    0.35
  -3 -22   0    0.82    0.19
   3 -22   0    0.65    0.31
   3 -22   0    0.08    0.60
  -3  22   0    0.82    0.20
  -3  22   0    0.97    0.75
  -3  22   0    0.58    0.27
   4 -22   0    5.24    1.16
  -4 -22   0    5.74    0.58
  -4 -22   0    5.50    0.73
  -4 -22   0    4.95    0.83
  -4 -22   0    5.17    0.92
  -4  22   0    5.23    1.36
  -4  22   0    4.87    0.72
  -4  22   0    5.14    0.74
  -4  22   0    4.93    0.56
  -5 -22   0   30.19    3.17
  -5 -22   0   34.15    2.93
  -5 -22   0   36.22    3.43
   5 -22   0   28.91    3.91
  -5 -22   0   32.41    3.22
  -5  22   0   35.48    4.26
  -5  22   0   30.30    3.17
  -5  22   0   31.31    3.35
  -6 -22   0    2.90    0.35
  -6 -22   0    3.29    0.78
  -6 -22   0    2.35    0.39
  -6 -22   0    3.34    0.42
  -6  22   0    2.24    0.54
  -6  22   0    3.10    0.57
  -6  22   0    2.93    0.54
  -7 -22   0    8.55    0.79
  -7 -22   0    6.17    0.72
  -7 -22   0    7.48    0.79
  -7  22   0    8.35    1.03
  -7  22   0    8.76    1.03
  -7  22   0    7.70    0.95
  -7  22   0    7.45    0.78
  -7  22   0    8.85    0.98
  -8 -22   0    0.42    0.23
  -8 -22   0    0.46    0.22
  -8  22   0    0.06    0.35
  -8  22   0    0.29    0.35
  -8  22   0   -0.06    0.19
  -8  22   0   -0.44    0.44
   0 -23   0   -0.12    0.27
   0  23   0    0.05    0.32
   0  23   0    0.72    0.52
   0  23   0    0.11    0.48
   1 -23   0    0.82    0.35
  -1 -23   0    1.80    0.45
   1  23   0    1.03    0.49
   1  23   0    1.17    0.34
  -1  23   0   -0.27    0.48
  -2 -23   0    7.73    0.74
   2 -23   0    7.18    1.00
  -2 -23   0    8.93    1.14
  -2 -23   0    8.74    1.03
   2  23   0    7.85    1.02
  -2  23   0    9.19    1.47
  -2  23   0    9.26    0.76
  -2  23   0    8.44    0.95
  -3 -23   0    3.75    0.45
  -3 -23   0    3.78    0.73
   3 -23   0    3.92    1.05
  -3 -23   0    3.96    0.68
   3 -23   0    5.34    0.67
  -3  23   0    3.95    0.57
  -3  23   0    3.02    0.98
  -3  23   0    4.37    0.45
  -4 -23   0    0.29    0.41
   4 -23   0    0.98    0.71
  -4 -23   0    0.98    0.53
  -4 -23   0    0.59    0.21
  -4  23   0    1.19    0.26
  -4  23   0    1.10    0.35
  -4  23   0    1.45    0.94
  -4  23   0    0.80    0.35
  -5 -23   0    2.10    0.33
  -5 -23   0    2.17    0.64
  -5  23   0    2.08    0.47
  -5  23   0    1.33    0.44
  -6 -23   0    4.65    0.55
  -6 -23   0    4.54    0.52
  -6 -23   0    5.85    0.58
  -6  23   0    4.02    0.68
  -6  23   0    4.14    0.72
  -6  23   0    5.51    0.72
  -7 -23   0   16.93    1.51
  -7 -23   0   14.69    1.47
  -7 -23   0   17.18    1.56
  -7  23   0   16.14    1.82
  -7  23   0   15.67    1.70
  -7  23   0   17.17    1.87
  -7  23   0   18.02    1.53
  -8 -23   0    5.42    0.55
  -8 -23   0    3.96    0.53
  -8  23   0    4.79    0.68
  -8  23   0    5.24    0.81
  -8  23   0    5.44    0.56
  -8  23   0    4.03    0.68
   0 -24   0    1.66    0.26
   0 -24   0    1.83    0.44
   0  24   0    1.56    0.47
   0  24   0    1.76    0.62
   1 -24   0   24.07    2.31
  -1 -24   0   22.82    2.32
  -1  24   0   21.22    2.25
   1  24   0   22.20    2.29
  -1  24   0   20.01    2.66
  -2 -24   0    4.80    0.83
  -2 -24   0    5.52    0.53
  -2 -24   0    5.30    0.78
   2 -24   0    5.06    0.74
  -2  24   0    5.77    0.55
  -2  24   0    5.41    1.14
  -2  24   0    5.41    0.69
   2  24   0    5.71    0.79
   3 -24   0    0.36    0.70
  -3 -24   0   -0.25    0.37
  -3 -24   0   -0.52    0.42
   3 -24   0    0.85    0.30
  -3 -24   0    1.24    0.22
   3 -24   0    0.52    0.33
  -3  24   0    0.00    0.67
   3  24   0    0.15    0.32
  -3  24   0    0.30    0.19
  -3  24   0    0.73    0.29
  -4 -24   0    0.63    0.48
  -4 -24   0   -0.36    0.39
  -4 -24   0    0.00    0.18
   4 -24   0    0.53    0.69
  -4  24   0    0.03    0.29
  -4  24   0    0.10    0.22
  -4  24   0    0.46    0.94
  -5 -24   0   13.13    1.27
  -5 -24   0   13.72    1.23
  -5 -24   0   12.89    1.60
  -5 -24   0   13.35    1.23
  -5 -24   0   12.86    1.40
  -5  24   0   12.20    1.52
  -5  24   0   13.95    1.47
  -6 -24   0    3.27    0.42
  -6 -24   0    2.29    0.51
  -6 -24   0    2.47    0.34
  -6 -24   0    3.18    0.43
  -6  24   0    2.63    0.56
   6  24   0    2.95    0.63
  -6  24   0    3.01    0.59
  -7 -24   0    1.20    0.28
  -7 -24   0    0.67    0.16
  -7 -24   0    0.93    0.26
  -7  24   0    0.64    0.22
  -7  24   0    0.51    0.39
  -7  24   0    0.00    0.46
  -7  24   0    0.21    0.37
  -8 -24   0   -0.14    0.19
  -8 -24   0    0.03    0.23
   8 -24   0    0.04    0.23
  -8  24   0   -0.78    0.31
  -8  24   0   -0.65    0.47
  -8  24   0   -0.31    0.31
  -8  24   0   -0.20    0.18
   0 -25   0   -0.05    0.31
   0 -25   0    0.07    0.17
   0  25   0    0.10    0.19
   0  25   0   -0.37    0.36
   0  25   0    0.97    0.53
   1 -25   0   10.09    0.88
  -1 -25   0    9.29    0.88
   1 -25   0   10.74    1.17
  -1 -25   0    8.09    1.16
   1  25   0    8.35    1.16
  -1  25   0    9.99    1.06
  -1  25   0    9.05    1.52
  -2 -25   0   13.95    1.19
   2 -25   0   14.06    1.55
  -2 -25   0   13.49    1.63
  -2  25   0   14.97    2.13
  -2  25   0   14.82    1.52
   2  25   0   14.54    1.59
  -2  25   0   13.60    1.23
  -3 -25   0   38.00    4.12
   3 -25   0   43.54    4.31
  -3 -25   0   44.48    3.92
  -3 -25   0   40.60    4.40
   3  25   0   51.62    4.37
  -3  25   0   43.62    4.42
  -3  25   0   44.26    3.62
  -3  25   0   40.45    5.09
  -4 -25   0    3.10    0.72
  -4 -25   0    3.96    0.81
   4 -25   0    1.78    0.84
   4 -25   0    3.60    0.54
  -4 -25   0    4.31    0.48
   4  25   0    5.09    0.73
  -4  25   0    3.42    0.57
  -4  25   0    3.93    0.46
  -5 -25   0    1.98    0.64
  -5 -25   0    3.07    0.40
  -5 -25   0    3.51    0.55
  -5 -25   0    2.68    0.35
  -5 -25   0    2.05    0.37
   5  25   0    3.27    0.62
  -5  25   0    2.62    0.54
  -5  25   0    2.32    0.55
  -6 -25   0    0.99    0.21
  -6 -25   0    1.42    0.30
  -6 -25   0    0.70    0.27
  -6 -25   0    1.42    0.42
   6  25   0    1.40    0.48
  -6  25   0    1.56    0.47
  -6  25   0    0.86    0.41
  -7 -25   0    0.05    0.22
  -7 -25   0    0.10    0.13
  -7 -25   0    0.26    0.22
   7 -25   0   -0.24    0.24
  -7  25   0    0.02    0.33
  -7  25   0   -0.05    0.34
  -7  25   0    0.17    0.20
   8 -25   0    0.33    0.23
  -8 -25   0    0.79    0.22
  -8 -25   0    1.03    0.26
  -8  25   0    0.44    0.22
  -8  25   0    0.54    0.37
   0 -26   0   53.63    3.99
   0 -26   0   51.93    4.81
   0  26   0   53.58    4.86
   0  26   0   41.50    5.38
   0  26   0   41.99    4.82
  -1 -26   0    8.95    0.88
   1 -26   0    9.87    0.88
   1 -26   0    9.78    1.15
  -1 -26   0   11.40    1.29
  -1  26   0    9.27    1.06
  -1  26   0    8.18    1.48
   1  26   0    9.58    1.22
  -2 -26   0    1.68    0.54
   2 -26   0    1.27    0.41
  -2  26   0    0.17    0.72
  -2  26   0    1.18    0.23
  -2  26   0    1.23    0.33
   2  26   0    1.02    0.44
   3 -26   0   14.18    1.54
  -3 -26   0   12.37    1.63
  -3 -26   0   14.28    1.32
   3  26   0   15.50    1.61
  -3  26   0   14.32    2.22
  -3  26   0   13.29    1.54
  -3  26   0   14.29    1.25
  -4 -26   0   -0.13    0.32
  -4 -26   0    0.70    0.24
  -4 -26   0    0.35    0.20
   4 -26   0    0.70    0.29
  -4 -26   0    0.69    0.20
  -4 -26   0    1.05    0.50
  -4  26   0    0.24    0.31
   4  26   0    0.43    0.41
  -4  26   0    0.43    0.22
  -4  26   0    0.06    0.33
   5 -26   0    0.85    0.29
  -5 -26   0    0.61    0.20
  -5 -26   0    1.39    0.28
  -5 -26   0    1.66    0.53
  -5 -26   0    0.68    0.35
  -5 -26   0    0.63    0.26
  -5  26   0    1.21    0.46
   5  26   0    0.68    0.44
  -5  26   0    0.85    0.41
  -6 -26   0    2.76    0.39
  -6 -26   0    2.67    0.50
  -6 -26   0    2.66    0.34
   6 -26   0    2.27    0.42
  -6 -26   0    1.96    0.37
   6  26   0    3.70    0.66
  -6  26   0    3.16    0.58
  -6  26   0    3.22    0.57
   7 -26   0    5.19    0.65
  -7 -26   0    5.83    0.60
  -7 -26   0    5.23    0.58
  -7 -26   0    4.90    0.52
  -7  26   0    5.09    0.72
  -7  26   0    4.69    0.74
  -7  26   0    5.80    0.60
   0 -27   0    0.30    0.38
   0 -27   0    0.07    0.19
   0  27   0    0.26    0.22
   0  27   0   -0.30    0.50
  -1 -27   0   22.40    2.28
  -1 -27   0   19.96    1.78
   1 -27   0   21.75    1.80
   1 -27   0   23.89    2.25
  -1  27   0   18.27    2.17
   1  27   0   26.72    2.34
  -1  27   0   18.55    2.65
   2 -27   0   29.43    2.93
  -2 -27   0   29.48    3.01
  -2  27   0   27.78    2.41
   2  27   0   33.11    3.00
  -2  27   0   24.99    3.47
  -2  27   0   27.73    2.94
  -3 -27   0   -0.36    0.45
  -3 -27   0   -0.23    0.47
   3 -27   0   -0.31    0.30
  -3 -27   0    0.06    0.17
   3  27   0    1.28    0.46
  -3  27   0    0.57    0.29
  -3  27   0    0.53    0.22
  -4 -27   0    1.37    0.54
  -4 -27   0    1.70    0.28
  -4 -27   0    1.49    0.27
  -4 -27   0    0.84    0.39
  -4 -27   0    1.50    0.29
   4 -27   0    1.42    0.33
   4  27   0    1.40    0.50
  -4  27   0    1.94    0.45
  -4  27   0    1.13    0.28
  -4  27   0    1.97    0.43
  -5 -27   0    3.65    0.47
   5 -27   0    3.02    0.50
  -5 -27   0    4.27    0.58
  -5 -27   0    3.73    0.44
  -5 -27   0    3.99    0.74
  -5 -27   0    3.30    0.45
   5  27   0    4.60    0.73
  -5  27   0    3.24    0.63
  -5  27   0    3.21    0.62
   6 -27   0    4.13    0.51
  -6 -27   0    4.02    0.48
  -6 -27   0    3.31    0.45
  -6 -27   0    2.67    0.50
  -6 -27   0    3.28    0.40
  -6  27   0    3.26    0.60
  -6  27   0    2.75    0.57
  -7 -27   0    0.17    0.23
   7 -27   0    0.17    0.23
  -7 -27   0    0.21    0.23
  -7 -27   0    0.24    0.13
  -7  27   0    0.22    0.20
  -7  27   0   -0.10    0.35
  -7  27   0   -0.23    0.33
   0 -28   0   32.29    3.30
  -1 -28   0    2.44    0.61
  -1 -28   0    2.90    0.36
   1 -28   0    3.07    0.39
   1 -28   0    4.42    0.66
   1  28   0    4.02    0.74
  -1  28   0    2.67    0.45
  -1  28   0    3.00    0.95
  -2 -28   0   11.37    1.39
   2 -28   0   10.16    1.23
   2  28   0   13.20    1.36
  -2  28   0    9.72    1.18
  -2  28   0    9.83    0.95
  -3 -28   0    2.23    0.32
  -3 -28   0    2.32    0.47
  -3 -28   0    1.90    0.59
  -3 -28   0    2.26    0.32
  -3 -28   0    1.93    0.33
  -3  28   0    2.07    0.44
   3  28   0    3.11    0.62
  -3  28   0    2.40    0.45
  -3  28   0    1.44    0.32
  -4 -28   0    7.37    0.74
  -4 -28   0    6.62    0.72
  -4 -28   0    6.92    1.03
  -4 -28   0    7.20    0.75
  -4 -28   0    6.57    0.85
  -4  28   0    8.86    0.94
  -4  28   0    6.19    0.69
   4  28   0    7.49    1.01
  -4  28   0    8.14    0.97
  -5 -28   0    4.99    0.64
  -5 -28   0    5.49    0.55
   5 -28   0    3.67    0.55
  -5 -28   0    4.41    0.54
  -5 -28   0    4.11    0.50
  -5 -28   0    5.22    0.81
  -5  28   0    4.11    0.69
   5  28   0    5.17    0.79
  -5  28   0    3.96    0.70
  -6 -28   0    0.27    0.25
  -6 -28   0    0.16    0.23
  -6 -28   0    0.22    0.16
  -6 -28   0   -0.44    0.26
   6 -28   0    0.07    0.22
  -6  28   0   -0.01    0.37
  -6  28   0   -0.25    0.34
  -7 -28   0    0.07    0.12
   7 -28   0    0.09    0.21
  -7 -28   0    0.02    0.23
  -7 -28   0   -0.08    0.20
  -7  28   0    0.22    0.20
  -7  28   0   -0.56    0.29
  -7  28   0   -0.03    0.35
   0 -29   0   -0.28    0.35
   0 -29   0   -0.51    0.19
  -1 -29   0    0.28    0.19
  -1 -29   0    0.81    0.47
   1 -29   0    0.87    0.44
   1 -29   0    0.25    0.22
   1  29   0    0.82    0.53
  -1  29   0    0.38    0.25
   2 -29   0   17.85    1.66
  -2 -29   0   14.03    1.88
   2 -29   0   16.45    1.82
  -2 -29   0   17.34    1.71
  -2  29   0   16.11    1.68
  -2  29   0   17.22    1.48
   2  29   0   20.64    1.95
  -2  29   0   16.29    1.80
  -3 -29   0    3.16    0.42
  -3 -29   0    2.85    0.66
  -3 -29   0    3.40    0.43
  -3 -29   0    3.25    0.55
  -3  29   0    3.29    0.55
   3  29   0    4.42    0.73
  -3  29   0    3.39    0.44
  -3  29   0    3.78    0.55
  -4 -29   0    2.44    0.37
  -4 -29   0    2.63    0.39
  -4 -29   0    3.03    0.50
  -4 -29   0    2.81    0.39
  -4 -29   0    2.79    0.63
   4  29   0    1.77    0.54
  -4  29   0    3.66    0.56
  -4  29   0    3.27    0.56
  -4  29   0    3.06    0.38
  -5 -29   0   -0.33    0.21
  -5 -29   0    0.00    0.21
  -5 -29   0   -0.15    0.17
   5 -29   0    0.03    0.21
  -5 -29   0   -0.29    0.26
  -5  29   0   -0.41    0.35
  -5  29   0   -0.13    0.39
   5  29   0   -0.12    0.37
  -6 -29   0    0.71    0.20
  -6 -29   0    0.82    0.26
   6 -29   0    0.86    0.26
  -6 -29   0    0.53    0.26
  -6 -29   0    0.56    0.29
  -6  29   0    0.74    0.38
  -6  29   0    0.32    0.40
  -7 -29   0   -0.11    0.22
   0 -30   0   34.91    3.15
   0 -30   0   33.98    2.80
   0 -30   0   31.02    3.41
   1 -30   0    3.02    0.61
  -1 -30   0    2.37    0.30
   1 -30   0    2.93    0.48
  -1 -30   0    1.54    0.56
  -1 -30   0    2.10    0.46
  -1  30   0    2.93    0.43
   1  30   0    2.84    0.73
  -1  30   0    2.49    0.43
   2 -30   0    0.94    0.40
   2 -30   0    1.21    0.33
  -2 -30   0    0.30    0.45
   2 -30   0    1.25    0.25
  -2 -30   0    0.94    0.35
  -2  30   0    0.90    0.31
  -2  30   0    1.08    0.34
   2  30   0    1.14    0.53
  -2  30   0    0.94    0.26
  -3 -30   0    5.93    0.58
  -3 -30   0    4.44    0.79
  -3 -30   0    4.44    0.65
  -3  30   0    5.85    0.59
  -3  30   0    4.86    0.67
   3  30   0    6.32    0.89
  -3  30   0    3.86    0.67
  -4 -30   0    3.60    0.45
  -4 -30   0    3.67    0.70
  -4 -30   0    4.08    0.46
  -4 -30   0    2.54    0.42
  -4 -30   0    3.85    0.55
  -4  30   0    3.59    0.61
   4  30   0    3.04    0.65
  -4  30   0    4.10    0.43
  -4  30   0    4.18    0.62
  -5 -30   0    3.17    0.41
  -5 -30   0    3.17    0.47
  -5 -30   0    2.78    0.39
  -5 -30   0    3.25    0.41
  -5  30   0    2.84    0.58
  -5  30   0    2.99    0.57
  -6 -30   0    0.20    0.27
  -6 -30   0    0.29    0.24
   6 -30   0    0.51    0.22
  -6 -30   0    0.22    0.17
  -6 -30   0    0.37    0.22
  -6  30   0    0.12    0.33
  -6  30   0    0.32    0.38
   0 -31   0   -0.62    0.36
   0 -31   0   -0.32    0.28
   0 -31   0    0.06    0.20
   1 -31   0   10.08    1.30
  -1 -31   0   13.07    1.22
  -1 -31   0   11.34    1.37
  -1 -31   0   10.51    0.95
   1 -31   0   12.42    1.18
  -1  31   0    9.71    1.15
  -1  31   0   11.15    1.24
   1  31   0   15.19    1.60
  -2 -31   0    2.27    0.60
   2 -31   0    2.43    0.41
  -2 -31   0    2.09    0.46
   2 -31   0    1.84    0.50
   2 -31   0    1.93    0.32
  -2  31   0    3.10    0.46
  -2  31   0    1.67    0.34
  -2  31   0    2.84    0.44
   2  31   0    2.54    0.62
  -3 -31   0    9.71    1.12
  -3 -31   0    9.78    1.31
   3  31   0   10.97    1.35
  -3  31   0    9.70    1.13
  -3  31   0   11.75    1.01
  -3  31   0   11.06    1.22
  -4 -31   0    1.19    0.45
  -4 -31   0    0.74    0.24
  -4 -31   0    1.19    0.25
  -4 -31   0    0.46    0.32
  -4 -31   0    1.17    0.25
   4  31   0    0.01    0.38
  -4  31   0    0.54    0.23
  -4  31   0    1.17    0.38
  -4  31   0    1.23    0.41
  -5 -31   0    2.60    0.34
  -5 -31   0    1.79    0.38
  -5 -31   0    2.46    0.34
  -5 -31   0    2.02    0.33
  -5  31   0    2.69    0.52
  -5  31   0    2.57    0.50
  -6 -31   0   -0.07    0.21
  -6 -31   0   -0.05    0.18
  -6 -31   0   -0.07    0.22
   6 -31   0    0.47    0.19
  -6 -31   0    0.03    0.16
  -6  31   0   -0.13    0.31
  -6  31   0    0.31    0.36
   0 -32   0    7.00    0.74
   0 -32   0    7.43    1.05
   0 -32   0    9.37    0.91
   1 -32   0    7.37    1.14
   1 -32   0    8.91    1.00
  -1 -32   0   10.13    0.79
  -1 -32   0    9.40    1.03
  -1 -32   0    7.52    1.16
   1 -32   0    8.39    0.87
   1  32   0   12.08    1.37
  -1  32   0    9.53    1.06
  -2 -32   0    1.17    0.37
  -2 -32   0    0.84    0.45
   2 -32   0    1.77    0.35
   2 -32   0    1.11    0.42
  -2  32   0    1.24    0.34
   2  32   0    1.59    0.58
  -2  32   0    0.95    0.29
  -2  32   0    1.44    0.35
  -3 -32   0    8.06    0.93
  -3 -32   0    8.78    1.12
  -3  32   0    8.13    0.96
   3  32   0    8.01    1.10
  -3  32   0    8.31    1.02
  -3  32   0    8.75    0.85
  -4 -32   0    2.55    0.35
  -4 -32   0    2.18    0.33
  -4 -32   0    1.79    0.39
  -4 -32   0    2.28    0.33
  -4  32   0    2.55    0.50
  -4  32   0    2.00    0.29
  -4  32   0    1.91    0.48
  -5 -32   0    2.50    0.38
  -5 -32   0    2.71    0.39
  -5 -32   0    3.48    0.41
  -5 -32   0    3.40    0.46
  -5  32   0    3.46    0.57
  -5  32   0    4.21    0.60
   0 -33   0    0.16    0.37
   0 -33   0    0.02    0.28
   0 -33   0    0.03    0.18
   1 -33   0    6.11    0.85
   1 -33   0    6.64    0.72
   1 -33   0    5.22    0.58
  -1 -33   0    7.18    0.76
  -1 -33   0    3.89    0.80
  -2 -33   0    1.62    0.39
   2 -33   0    1.30    0.41
   2 -33   0    0.82    0.26
  -2 -33   0    1.51    0.51
   2 -33   0    1.91    0.35
   2  33   0    2.05    0.60
  -2  33   0    1.33    0.35
  -2  33   0    1.77    0.37
  -2  33   0    1.28    0.30
  -3 -33   0    7.18    0.93
  -3  33   0    8.97    1.03
  -3  33   0    9.24    0.85
  -3  33   0    9.09    0.98
  -4 -33   0    0.23    0.20
  -4 -33   0    0.38    0.21
  -4 -33   0    0.34    0.28
  -4  33   0    0.39    0.18
  -4  33   0    0.54    0.38
  -4  33   0    0.25    0.33
  -5 -33   0    0.00    0.17
  -5 -33   0    0.24    0.20
  -5 -33   0    0.02    0.23
  -5 -33   0    0.11    0.17
  -5  33   0    0.44    0.35
  -5  33   0    0.38    0.33
   0 -34   0   10.64    0.84
   0 -34   0    6.76    1.11
   0 -34   0    9.66    1.02
  -1 -34   0   -0.24    0.36
  -1 -34   0    0.31    0.31
   1 -34   0    0.61    0.29
   1 -34   0    0.68    0.38
   1 -34   0    0.53    0.22
  -2 -34   0    5.08    0.66
   2 -34   0    5.00    0.54
   2 -34   0    4.78    0.61
  -2  34   0    5.75    0.71
  -2  34   0    5.09    0.66
  -2  34   0    5.52    0.59
  -3 -34   0    0.37    0.29
   3 -34   0   -0.08    0.18
  -3  34   0    0.01    0.27
  -3  34   0    0.35    0.32
  -3  34   0    0.02    0.21
  -4 -34   0    0.64    0.21
  -4 -34   0    0.43    0.28
  -4 -34   0    0.13    0.19
  -4  34   0    0.80    0.37
  -4  34   0    1.47    0.42
  -5 -34   0   -0.02    0.17
  -5 -34   0   -0.11    0.15
  -5  34   0    0.08    0.33
  -5  34   0   -0.02    0.28
   0 -35   0    0.09    0.13
   0 -35   0   -0.02    0.27
  -1 -35   0   -0.78    0.26
   1 -35   0    0.15    0.26
   1 -35   0   -0.12    0.16
  -2 -35   0    0.28    0.30
   2 -35   0    0.15    0.18
   2 -35   0   -0.22    0.22
  -2  35   0    0.51    0.28
  -2  35   0    0.05    0.27
  -2  35   0   -0.13    0.24
  -3 -35   0   14.60    1.48
   3 -35   0   12.48    1.29
  -3  35   0   17.62    1.33
  -3  35   0   15.58    1.64
  -3  35   0   17.17    1.55
  -4 -35   0    0.08    0.17
  -4 -35   0    0.00    0.23
  -4  35   0    0.48    0.34
  -4  35   0   -0.15    0.28
   0 -36   0    2.34    0.40
  -1 -36   0    0.99    0.32
   1 -36   0    1.08    0.29
   1 -36   0    0.96    0.19
  -2 -36   0    0.69    0.31
   2 -36   0    0.25    0.17
   2 -36   0    0.72    0.25
  -2  36   0    0.20    0.25
  -2  36   0    0.44    0.29
  -3 -36   0    0.91    0.29
   3 -36   0    0.62    0.18
  -3  36   0    0.74    0.31
  -3  36   0    0.68    0.33
  -3  36   0    0.58    0.21
   0 -37   0   -0.39    0.23
   1 -37   0    9.06    0.76
   1 -37   0    8.43    0.91
  -1 -37   0    8.38    0.93
  -1  37   0    9.74    0.87
  -2 -37   0    0.01    0.25
   2 -37   0    0.08    0.13
   2 -37   0    0.06    0.20
  -2  37   0   -0.26    0.20
  -2  37   0    0.29    0.27
   3 -37   0    1.24    0.21
  -3 -37   0    2.05    0.33
  -3  37   0    1.87    0.39
   0 -38   0    0.75    0.26
   1 -38   0    0.00    0.09
   1 -38   0    0.05    0.20
  -1 -38   0   -0.07    0.23
  -1  38   0   -0.48    0.21
  -7   0   1   13.67    1.67
  -7   0   1   10.43    1.22
  -6   0   1    0.82    0.36
  -6   0   1    0.37    0.38
  -6   0   1    0.92    0.24
  -5   0   1   61.89    6.09
  -5   0   1   61.54    7.11
  -5   0   1   69.00    6.18
  -5   0   1   62.13    7.16
   5   0  -1   68.38    6.14
  -4   0   1    0.00    0.15
   4   0  -1    0.22    0.36
  -4   0   1    0.01    0.26
  -4   0   1    0.30    0.52
  -3   0   1  649.58   65.60
   3   0  -1  807.15   63.05
  -3   0   1  734.15   62.30
  -3   0   1  682.70   75.48
  -3   0   1  627.76   73.26
  -2   0   1    0.02    0.10
  -2   0   1    0.14    0.11
  -2   0   1    0.26    0.25
  -1   0   1  490.40   44.03
  -1   0   1  488.61   45.86
   0   0  -1    0.04    0.05
   0   0  -1    0.08    0.07
   0   0   1    0.12    0.19
  -1   0  -1   74.35    7.08
   1   0   1   82.47    7.38
  -2   0  -1    0.10    0.11
  -2   0  -1    0.40    0.21
  -2   0  -1   -0.03    0.30
  -3   0  -1   10.44    1.19
  -3   0  -1    8.42    1.39
  -3   0  -1    9.79    1.11
   3   0   1   10.25    1.06
  -3   0  -1    9.51    1.00
  -4   0  -1    0.37    0.23
  -4   0  -1   -0.09    0.30
  -4   0  -1    0.40    0.52
  -4   0  -1   -0.28    0.13
   4   0   1    0.39    0.37
  -5   0  -1    7.09    0.95
  -5   0  -1    5.48    0.66
  -5   0  -1    6.92    1.28
   6   0   1   -0.14    0.26
  -6   0  -1    0.31    0.19
  -6   0  -1    0.58    0.80
  -7   0  -1   16.75    1.72
  -8   1   1    0.82    0.36
  -7   1   1    5.68    1.11
  -7   1   1    7.32    0.85
  -7   1   1    6.70    0.73
  -6  -1   1    4.37    0.67
  -6  -1   1    4.18    0.55
  -6  -1   1    5.75    0.93
  -6   1   1    4.02    0.55
  -6   1   1    6.35    0.97
  -6   1   1    4.11    0.66
   5  -1  -1    0.79    0.56
  -5  -1   1    1.45    0.25
  -5  -1   1    1.91    0.49
  -5  -1   1    1.68    0.33
  -5   1   1    1.51    0.48
  -5   1   1    1.79    0.78
  -5   1   1    1.28    0.24
  -5   1   1    1.66    0.34
   5   1  -1    1.41    0.63
  -4  -1   1    0.86    0.23
  -4  -1   1    0.81    0.34
  -4  -1   1    0.39    0.54
   4  -1  -1    1.15    0.44
  -4  -1   1    1.17    0.25
  -4  -1   1    0.85    0.28
  -4   1   1    1.05    0.37
   4   1  -1    1.15    0.44
  -4   1   1    0.70    0.22
  -4   1   1    0.74    0.63
   3  -1  -1    7.80    0.91
  -3  -1   1    7.13    0.72
  -3  -1   1    6.73    1.05
  -3  -1   1    7.62    0.94
  -3  -1   1    6.59    0.96
  -3  -1   1    6.84    0.74
  -3  -1   1    7.68    0.75
  -3   1   1    6.70    0.96
  -3   1   1    7.12    0.72
  -3   1   1    5.30    1.06
  -3   1   1    7.35    0.75
  -2  -1   1   13.18    1.20
   2  -1  -1   12.94    1.30
  -2  -1   1   13.48    1.26
  -2  -1   1   11.87    1.33
  -2   1   1   12.72    1.20
  -2   1   1   12.97    1.27
   1  -1  -1  223.10   17.69
  -1  -1   1  193.50   18.39
  -1  -1   1  172.74   17.70
  -1   1   1  191.90   17.45
  -1   1   1  195.99   18.40
   1   1  -1  199.75   17.46
   0  -1   1    3.90    0.62
   0  -1  -1    4.38    0.55
   0  -1  -1    4.52    0.53
   0   1  -1    3.79    0.53
   0   1   1    5.30    0.65
  -1  -1  -1  228.82   21.42
   1  -1   1  262.88   21.38
  -1   1  -1  261.80   21.25
  -1   1  -1  203.51   22.27
   1   1   1  233.20   22.28
   2  -1   1   15.17    1.34
  -2  -1  -1   14.62    1.37
  -2  -1  -1   10.76    1.36
  -2  -1  -1   14.78    1.35
  -2   1  -1   14.05    1.34
  -2   1  -1   10.29    1.45
  -3  -1  -1    5.70    0.60
  -3  -1  -1    5.26    0.57
  -3  -1  -1    5.96    0.73
   3  -1   1    5.84    0.73
  -3  -1  -1    5.07    0.72
  -3  -1  -1    4.40    0.96
  -3  -1  -1    6.03    0.74
  -3   1  -1    4.29    0.77
  -3   1  -1    5.89    0.74
  -3   1  -1    5.26    0.60
  -3   1  -1    4.37    0.97
   4  -1   1   42.11    3.97
  -4  -1  -1   42.39    4.63
  -4  -1  -1   44.18    3.92
  -4  -1  -1   37.32    4.69
  -4   1  -1   42.88    4.65
  -4   1  -1   33.74    4.69
  -4   1  -1   45.79    4.02
  -4   1  -1   38.65    3.92
   4   1   1   43.77    3.96
  -5  -1  -1   25.84    2.66
  -5  -1  -1   23.76    2.90
  -5  -1  -1   21.05    2.21
  -5  -1  -1   25.09    2.29
   5   1   1   22.45    2.28
  -5   1  -1   21.24    2.21
  -5   1  -1   24.92    2.68
  -5   1  -1   21.44    2.89
   6  -1   1    4.48    0.70
  -6  -1  -1    4.86    0.61
  -6  -1  -1    5.83    1.27
  -6   1  -1    5.44    1.26
  -6   1  -1    4.61    0.60
   6   1   1    5.38    0.75
  -7  -1  -1    0.77    0.31
  -7   1  -1    1.46    0.34
  -8   1  -1    9.83    1.16
  -8   2   1    0.53    0.34
  -7   2   1    1.55    0.35
  -7   2   1    1.61    0.29
  -6  -2   1   14.96    1.68
  -6   2   1   11.52    1.27
  -6   2   1   12.55    1.66
  -6   2   1   12.14    1.37
  -5  -2   1    7.95    0.87
  -5  -2   1    8.49    1.05
   5  -2  -1    8.47    1.18
  -5  -2   1    7.09    1.11
  -5  -2   1    7.34    0.79
  -5   2   1    6.08    1.36
  -5   2   1    6.90    0.78
   5   2  -1    8.00    1.18
  -5   2   1    6.93    0.85
  -5   2   1    8.07    1.17
  -4  -2   1   20.15    2.64
   4  -2  -1   22.83    2.33
  -4  -2   1   23.70    2.24
  -4  -2   1   22.89    2.70
  -4  -2   1   23.03    2.15
  -4   2   1   17.87    2.74
  -4   2   1   25.34    2.25
  -4   2   1   23.37    2.67
  -3  -2   1   41.35    3.66
  -3  -2   1   40.26    4.43
  -3  -2   1   37.74    3.84
  -3  -2   1   40.40    3.67
   3  -2  -1   42.45    3.82
  -3  -2   1   40.44    3.84
  -3  -2   1   36.25    4.50
  -3   2   1   39.65    3.85
  -3   2   1   43.40    3.67
  -3   2   1   40.44    4.51
  -2  -2   1  153.46   14.16
  -2  -2   1  142.24   13.70
   2  -2  -1  169.29   13.68
  -2   2   1  148.26   14.16
  -2   2   1  141.71   13.45
  -1  -2   1   75.02    6.64
  -1  -2   1   66.92    6.49
   1   2  -1   74.36    6.31
  -1   2   1   60.91    6.31
  -1   2   1   75.18    6.65
   0  -2   1   10.51    1.15
   0  -2  -1   11.69    1.06
   0  -2   1   13.41    1.09
   0  -2  -1   10.70    1.10
   0   2  -1   11.95    1.08
   0   2   1   11.69    1.17
   1  -2   1  343.09   32.74
  -1  -2  -1  378.57   32.78
   1   2   1  364.17   34.13
  -1   2  -1  371.00   34.12
   2  -2   1    4.68    0.57
  -2  -2  -1    3.85    0.55
  -2  -2  -1    5.29    0.67
  -2   2  -1    3.33    0.66
  -2   2  -1    4.10    0.47
   3  -2   1  985.94   79.76
  -3  -2  -1  820.96   78.87
  -3  -2  -1  858.22   78.95
  -3  -2  -1  929.25   95.48
  -3   2  -1 1000.00   95.51
  -3   2  -1  770.38   92.75
  -3   2  -1  838.44   83.05
  -4  -2  -1   23.55    2.65
  -4  -2  -1   21.59    2.16
  -4  -2  -1   26.46    2.30
   4  -2   1   22.00    2.32
  -4  -2  -1   22.92    2.82
  -4   2  -1   22.87    2.31
  -4   2  -1   17.69    2.84
  -4   2  -1   25.65    2.30
  -4   2  -1   24.49    2.69
  -5  -2  -1    1.48    0.44
  -5  -2  -1    0.51    0.65
  -5  -2  -1    1.37    0.25
  -5  -2  -1    1.13    0.36
  -5   2  -1    1.19    0.24
  -5   2  -1    1.15    0.38
   5   2   1    1.58    0.34
  -5   2  -1    0.59    0.73
  -6  -2  -1    3.08    0.44
  -6  -2  -1    2.97    0.97
   6  -2   1    3.58    0.65
   6  -2   1    2.73    0.53
  -6   2  -1    3.10    0.44
  -6   2  -1    4.04    1.17
   6   2   1    2.91    0.54
  -7   2  -1   10.51    1.15
  -7   2  -1   10.08    1.99
  -8   2  -1    0.82    0.39
  -9   3   1    4.52    0.64
  -8   3   1   45.60    4.19
  -8   3   1   40.86    4.11
  -7   3   1    0.30    0.18
  -7   3   1    0.51    0.26
  -6  -3   1    3.11    0.67
  -6   3   1    3.56    0.56
  -6   3   1    2.05    0.63
  -6   3   1    2.62    0.41
  -5  -3   1    3.67    0.54
  -5  -3   1    3.88    0.66
   5  -3  -1    7.83    1.00
  -5  -3   1    4.14    0.72
  -5   3   1    3.47    0.46
  -5   3   1    2.74    1.03
  -5   3   1    3.44    0.54
  -5   3   1    3.80    0.74
   5   3  -1    2.01    0.71
  -4  -3   1    1.32    0.53
  -4  -3   1    0.55    0.53
  -4  -3   1    0.89    0.26
   4  -3  -1    1.25    0.50
  -4  -3   1    0.92    0.36
  -4  -3   1    1.32    0.26
  -4   3   1    1.25    0.73
  -4   3   1    0.94    0.37
  -4   3   1    1.42    0.28
   3  -3  -1    2.56    0.53
  -3  -3   1    2.31    0.30
  -3  -3   1    2.37    0.33
  -3  -3   1    2.81    0.64
  -3  -3   1    2.00    0.48
  -3  -3   1    1.00    0.52
  -3   3   1    2.92    0.36
  -3   3   1    2.17    0.32
  -3   3   1    1.19    0.60
  -3   3   1    1.96    0.46
   2  -3  -1    8.23    0.97
  -2  -3   1    8.49    0.80
  -2  -3   1    7.71    1.05
  -2   3   1    7.66    1.01
   2   3  -1    8.18    0.77
  -2   3   1    7.88    0.82
  -2   3   1    7.22    0.82
   1  -3  -1  162.20   14.00
  -1  -3   1  146.97   14.47
  -1  -3   1  151.97   14.01
  -1   3   1  157.02   13.76
   1   3  -1  153.29   13.76
  -1   3   1  155.78   14.49
   0  -3   1   30.52    2.60
   0  -3   1   27.28    2.70
   0  -3  -1   25.27    2.61
   0  -3  -1   29.02    2.56
   0   3  -1   27.76    2.57
   0   3   1   30.65    2.71
  -1  -3  -1  104.19   11.02
  -1  -3  -1  125.65   11.15
   1  -3   1  123.29   11.12
  -1   3  -1  126.82   11.07
   1   3   1  127.07   11.61
  -1   3  -1  132.96   11.59
  -2  -3  -1    1.46    0.31
   2  -3   1    0.71    0.36
  -2  -3  -1    2.34    0.57
  -2   3  -1    1.49    0.49
  -2   3  -1    1.97    0.54
  -2   3  -1    1.76    0.24
   2   3   1    1.62    0.23
  -3  -3  -1   72.53    6.20
  -3  -3  -1   70.76    7.42
  -3  -3  -1   65.37    6.30
  -3  -3  -1   70.44    7.37
   3  -3   1   59.73    6.26
  -3  -3  -1   66.21    6.11
  -3   3  -1   69.46    6.44
  -3   3  -1   78.31    7.46
  -3   3  -1   56.95    7.32
   4  -3   1    6.94    1.17
  -4  -3  -1    9.79    1.50
  -4  -3  -1   11.73    1.14
  -4  -3  -1    9.58    1.02
  -4  -3  -1   10.90    1.26
  -4  -3  -1    8.16    1.22
  -4   3  -1   11.45    1.31
  -4   3  -1    7.98    1.51
  -4   3  -1   11.98    1.09
  -4   3  -1   10.20    1.26
   4   3   1   10.60    1.08
  -5  -3  -1   54.71    6.23
  -5  -3  -1   55.04    5.42
  -5  -3  -1   53.93    5.32
  -5  -3  -1   63.19    5.23
  -5   3  -1   58.85    5.41
  -5   3  -1   56.10    5.32
  -5   3  -1   46.72    6.33
   5   3   1   57.90    5.40
   6  -3   1    7.95    1.14
   6  -3   1    7.85    1.00
  -6  -3  -1    9.61    1.52
  -6   3  -1    7.31    0.85
  -6   3  -1    7.31    1.65
  -7   3  -1   14.17    1.53
  -7   3  -1   14.31    2.58
  -7   3  -1   15.62    1.70
  -8   3  -1    3.80    0.63
  -9   3  -1   -0.09    0.37
 -10   4   1    5.94    0.80
  -9   4   1    0.22    0.38
  -9   4   1    0.48    0.32
  -8   4   1   72.20    6.39
  -8   4   1   62.06    6.32
  -7   4   1    7.44    0.85
  -7   4   1    6.70    0.77
  -6   4   1    4.36    1.36
  -6   4   1    6.01    1.01
  -6   4   1    4.91    0.60
  -6   4   1    4.79    0.71
   5  -4  -1    1.66    0.67
  -5  -4   1    1.51    0.52
  -5  -4   1    2.00    0.42
  -5  -4   1    1.82    0.49
  -5   4   1    2.00    0.31
  -5   4   1    2.22    0.40
  -5   4   1    1.88    0.55
  -5   4   1    1.59    0.91
  -4  -4   1   30.55    2.65
   4  -4  -1   28.07    2.74
  -4  -4   1   23.97    3.11
  -4  -4   1   29.92    3.15
  -4  -4   1   25.44    2.53
  -4  -4   1   27.26    2.78
  -4   4   1   27.73    3.15
  -4   4   1   28.65    2.66
  -4   4   1   18.00    3.21
   4   4  -1   28.24    2.51
  -3  -4   1  155.02   17.15
   3  -4  -1  204.80   17.15
  -3  -4   1  187.06   17.70
  -3  -4   1  203.29   19.87
  -3  -4   1  196.42   16.84
  -3  -4   1  164.19   20.43
  -3   4   1  187.75   16.84
  -3   4   1  196.88   17.73
   3   4  -1  198.49   16.82
  -3   4   1  187.23   20.44
   2  -4  -1   24.49    2.40
  -2  -4   1   24.22    2.23
  -2  -4   1   23.28    2.32
  -2  -4   1   23.00    2.47
  -2   4   1   25.99    2.35
  -2   4   1   23.34    2.29
  -2   4   1   25.41    2.76
   2   4  -1   24.78    2.22
   1  -4  -1  267.25   22.87
  -1  -4   1  243.11   22.86
  -1  -4   1  235.94   23.71
   1   4  -1  263.95   22.54
  -1   4   1  261.24   23.74
  -1   4   1  247.93   22.57
   0  -4  -1   32.51    3.21
   0  -4   1   34.92    3.31
   0  -4   1   37.50    3.20
   0   4   1   36.86    3.32
   0   4  -1   35.66    3.17
   0   4   1   33.02    3.14
  -1  -4  -1   25.72    2.40
   1  -4   1   26.92    2.37
  -1  -4  -1   25.04    2.36
  -1   4  -1   27.17    2.45
  -1   4  -1   24.73    2.43
   1   4   1   23.90    2.52
  -2  -4  -1  117.03   11.12
  -2  -4  -1  107.17   11.38
  -2  -4  -1  123.61   11.08
   2  -4   1  136.52   13.44
   2  -4   1  107.82   11.23
  -2   4  -1  144.84   11.25
  -2   4  -1  106.76   13.09
   2   4   1  138.08   11.68
  -2   4  -1  131.09   11.67
   3  -4   1    1.46    0.49
  -3  -4  -1    2.05    0.56
  -3  -4  -1    2.60    0.34
  -3  -4  -1    2.54    0.42
  -3  -4  -1    2.31    0.39
  -3  -4  -1    1.94    0.62
  -3   4  -1    2.17    0.64
  -3   4  -1    2.40    0.34
  -3   4  -1    2.18    0.66
   3   4   1    2.50    0.35
  -4  -4  -1   17.89    1.76
  -4  -4  -1   18.78    1.98
  -4  -4  -1   20.45    1.86
  -4  -4  -1   19.63    2.33
  -4   4  -1   19.31    1.86
   4   4   1   18.96    1.86
  -4   4  -1   15.29    2.29
  -4   4  -1   17.85    1.96
  -5  -4  -1   25.70    3.16
  -5  -4  -1   30.86    2.60
  -5  -4  -1   27.09    2.61
  -5   4  -1   25.62    2.61
  -5   4  -1   21.86    3.27
   5   4   1   25.32    2.61
  -5   4  -1   26.29    2.54
   6  -4   1    0.87    0.32
   6  -4   1    0.58    0.37
  -6  -4  -1    0.30    0.76
  -6   4  -1    0.74    0.22
  -6   4  -1    0.79    0.97
   7  -4   1   21.30    2.91
  -7   4  -1   26.91    2.66
  -7   4  -1   26.79    3.77
  -7   4  -1   25.10    2.45
  -8   4  -1    4.93    0.72
  -9   4  -1    0.50    0.31
  -9   4  -1   -0.20    0.35
 -10   5   1    0.19    0.37
  -9   5   1    1.85    0.54
  -9   5   1    2.73    0.50
  -9   5   1    3.45    0.45
  -8   5   1   12.48    1.32
  -8   5   1   11.27    1.22
   7  -5  -1   17.33    2.44
  -7   5   1   19.89    1.93
  -7   5   1   20.36    1.99
  -6   5   1    0.25    0.41
  -6   5   1    0.42    0.31
  -6   5   1    0.30    1.02
  -6   5   1    0.35    0.19
  -5  -5   1  136.35   13.16
   5  -5  -1  129.91   13.11
  -5  -5   1  144.28   12.82
  -5  -5   1  151.60   15.56
  -5  -5   1  121.67   13.69
  -5   5   1  162.13   15.64
  -5   5   1  132.64   15.42
  -5   5   1  145.98   13.49
  -5   5   1  150.93   13.39
  -4  -5   1    2.07    0.31
  -4  -5   1    1.67    0.59
   4  -5  -1    1.03    0.52
  -4  -5   1    1.34    0.31
  -4  -5   1    1.14    0.40
  -4   5   1    1.30    0.43
  -4   5   1    0.88    0.76
  -4   5   1    1.60    0.31
   4   5  -1    1.35    0.27
  -3  -5   1    7.45    1.11
  -3  -5   1   10.33    1.22
  -3  -5   1    8.33    0.85
   3  -5  -1    7.11    1.04
  -3  -5   1    9.11    0.85
  -3  -5   1    6.57    1.13
   3   5  -1    8.56    0.83
  -3   5   1    7.38    0.89
  -3   5   1    8.99    0.89
  -3   5   1    6.60    1.21
  -3   5   1    9.09    1.12
  -2  -5   1   57.37    4.97
  -2  -5   1   52.66    5.19
   2  -5  -1   53.02    5.15
  -2  -5   1   55.52    5.21
  -2   5   1   58.13    5.22
   2   5  -1   57.14    4.96
  -2   5   1   51.65    5.01
  -2   5   1   61.70    6.08
  -2   5   1   47.92    5.90
  -1  -5   1   34.93    3.46
   1  -5  -1   36.01    3.46
  -1  -5   1   37.15    3.44
  -1   5   1   37.13    3.34
   1   5  -1   37.64    3.32
  -1   5   1   38.35    3.49
   0  -5   1    3.61    0.40
   0  -5   1    3.30    0.36
   0  -5  -1    3.52    0.43
   0   5   1    3.41    0.38
   0   5   1    3.16    0.36
   0   5  -1    2.85    0.39
   1  -5   1   21.97    1.99
  -1  -5  -1   21.83    2.02
  -1  -5  -1   22.25    1.98
   1   5   1   18.13    2.17
  -1   5  -1   18.93    2.03
  -1   5  -1   23.18    2.05
  -2  -5  -1   27.47    3.02
   2  -5   1   26.18    2.90
  -2  -5  -1   27.31    2.64
  -2  -5  -1   25.18    2.37
  -2  -5  -1   24.79    2.41
   2  -5   1   24.34    2.44
   2   5   1   27.52    2.51
  -2   5  -1   29.72    2.56
  -2   5  -1   21.66    2.88
  -2   5  -1   26.72    2.49
  -3  -5  -1   49.96    4.60
  -3  -5  -1   42.27    4.83
  -3  -5  -1   50.79    5.57
  -3  -5  -1   51.56    4.66
   3  -5   1   54.82    5.60
   3   5   1   55.49    4.85
  -3   5  -1   41.82    4.79
  -3   5  -1   56.39    4.85
  -3   5  -1   44.93    5.58
  -4  -5  -1    4.45    0.57
  -4  -5  -1    4.82    0.95
  -4  -5  -1    4.39    0.81
  -4  -5  -1    6.04    0.70
   4   5   1    5.24    0.59
  -4   5  -1    3.74    0.93
  -4   5  -1    3.39    0.79
  -4   5  -1    4.98    0.58
  -5  -5  -1    1.95    0.33
  -5  -5  -1    1.00    0.31
  -5  -5  -1    1.81    0.42
  -5  -5  -1    1.29    0.69
   5  -5   1    1.65    0.44
  -5   5  -1    0.26    0.68
  -5   5  -1    1.14    0.24
  -5   5  -1    1.25    0.33
   6  -5   1    0.22    0.32
  -6   5  -1   -0.08    0.93
  -6   5  -1    0.57    0.21
   7  -5   1   11.54    1.77
  -7   5  -1   13.50    2.59
  -7   5  -1   14.40    1.44
  -7   5  -1   12.80    1.60
  -7   5  -1   14.20    1.37
  -8   5  -1   10.67    1.09
  -8   5  -1   13.46    1.32
  -9   5  -1    4.84    0.68
  -9   5  -1    5.29    0.79
 -10   5  -1    0.85    0.42
 -10   6   1   17.07    1.87
  -9   6   1    1.43    0.32
  -9   6   1    2.12    0.50
  -9   6   1    1.04    0.36
  -8   6   1    0.76    0.31
  -8   6   1    0.31    0.14
  -8   6   1    0.72    0.24
  -8   6   1    1.16    0.38
   7  -6  -1    1.94    0.63
  -7   6   1    1.34    0.34
  -7   6   1    1.12    0.26
  -6   6   1    3.18    0.45
  -6   6   1    1.01    1.20
  -5  -6   1    9.38    1.06
  -5  -6   1    9.38    1.24
  -5  -6   1   10.26    1.33
  -5  -6   1    9.53    1.42
  -5   6   1    8.48    1.06
  -5   6   1   11.61    1.42
  -5   6   1    7.57    1.75
  -5   6   1   10.12    1.01
   4  -6  -1  231.30   23.34
  -4  -6   1  214.29   23.39
  -4  -6   1  250.69   22.97
  -4  -6   1  248.18   27.85
  -4   6   1  260.64   24.09
  -4   6   1  289.03   24.20
  -4   6   1  268.86   27.90
   4   6  -1  282.86   22.96
  -3  -6   1    6.27    0.99
  -3  -6   1    3.88    0.90
  -3  -6   1    4.82    0.54
   3  -6  -1    3.91    0.77
  -3  -6   1    5.48    0.58
  -3  -6   1    5.60    0.87
  -3   6   1    3.91    0.75
  -3   6   1    6.19    0.60
   3   6  -1    5.71    0.56
  -3   6   1    3.39    0.86
  -2  -6   1  290.65   25.49
   2  -6  -1  288.35   25.86
  -2  -6   1  257.90   26.80
  -2  -6   1  268.72   25.91
   2   6  -1  298.37   25.48
  -2   6   1  250.14   29.99
  -2   6   1  332.33   25.57
  -2   6   1  315.52   30.92
  -2   6   1  273.86   26.83
   1  -6  -1    7.58    0.89
  -1  -6   1    7.91    0.86
   1   6  -1    7.13    0.74
  -1   6   1    8.63    0.78
  -1   6   1    7.38    0.77
   0  -6  -1   25.33    2.40
   0  -6   1   28.33    2.39
   0  -6   1   24.48    2.44
   0   6   1   24.85    2.33
   0   6   1   26.00    2.45
   0   6  -1   26.49    2.36
   1  -6   1  152.12   12.97
  -1  -6  -1  146.28   13.00
  -1   6  -1  151.23   13.49
  -1   6  -1  132.04   12.89
   1   6   1  134.47   13.56
  -2  -6  -1   41.88    4.04
  -2  -6  -1   38.18    4.06
  -2  -6  -1   42.53    4.25
  -2  -6  -1   56.19    5.10
  -2   6  -1   45.58    4.24
   2   6   1   44.28    4.28
  -2   6  -1   52.14    4.87
   3  -6   1    8.79    1.03
   3  -6   1    5.98    0.88
  -3  -6  -1    7.98    0.81
  -3  -6  -1    6.50    1.14
  -3  -6  -1    7.09    1.20
  -3  -6  -1    8.66    0.88
  -3   6  -1    7.82    1.15
  -3   6  -1    8.12    0.84
  -3   6  -1    6.62    1.18
   3   6   1    8.70    0.86
  -4  -6  -1   91.80    9.33
  -4  -6  -1   98.74    9.05
  -4  -6  -1   98.07   10.80
   4  -6   1  108.28   11.00
  -4  -6  -1  115.71    9.14
  -4   6  -1   98.97    9.46
  -4   6  -1   89.32   10.83
  -4   6  -1  111.70    9.54
  -4   6  -1   81.22    9.22
   4   6   1  103.69    9.54
   5  -6   1    2.79    0.55
  -5  -6  -1    2.78    0.84
  -5  -6  -1    1.90    0.41
  -5  -6  -1    2.48    0.39
  -5   6  -1    2.79    0.45
  -5   6  -1    1.45    0.78
  -5   6  -1    2.31    0.34
   6  -6   1   13.32    1.75
  -6   6  -1   13.88    1.39
  -6   6  -1   13.35    2.23
   7  -6   1   32.85    4.11
  -7   6  -1   35.19    3.72
  -7   6  -1   38.89    3.47
  -7   6  -1   37.87    4.80
  -7   6  -1   34.08    3.41
  -8   6  -1    1.85    0.30
  -8   6  -1    2.69    0.37
  -8   6  -1    2.36    0.63
  -8   6  -1    1.92    0.40
  -8   6  -1    1.97    0.47
  -9   6  -1    0.39    0.37
  -9   6  -1    0.14    0.30
 -10   6  -1   -0.10    0.38
 -10   7   1    0.25    0.38
  -9   7   1    1.59    0.38
  -9   7   1    1.00    0.29
  -9   7   1    0.45    0.39
  -8   7   1   25.95    2.61
  -8   7   1   26.38    2.36
  -8   7   1   26.51    2.76
  -8   7   1   28.55    2.70
   7  -7  -1   31.22    3.94
  -7   7   1   31.55    3.23
  -7   7   1   37.39    3.29
  -6   7   1    1.17    0.28
  -6   7   1    1.48    1.19
  -5  -7   1   27.94    2.72
  -5  -7   1   26.69    3.02
  -5  -7   1   23.18    2.94
  -5   7   1   28.81    2.85
  -5   7   1   25.11    3.64
   5   7  -1   34.10    2.71
  -5   7   1   29.97    2.77
  -4  -7   1    8.70    1.39
  -4  -7   1   10.28    1.34
  -4  -7   1    9.03    1.04
   4  -7  -1    7.42    1.21
  -4   7   1   11.53    1.04
  -4   7   1    7.96    1.60
  -4   7   1   10.69    1.41
  -4   7   1   11.03    1.10
   4   7  -1   10.84    1.03
   3  -7  -1    5.45    0.85
  -3  -7   1    6.20    0.66
  -3  -7   1    5.67    0.96
  -3  -7   1    5.88    0.99
  -3   7   1    5.08    1.00
  -3   7   1    6.10    0.67
  -3   7   1    7.24    0.96
   3   7  -1    6.15    0.64
  -2  -7   1    9.29    1.28
  -2  -7   1   10.43    1.03
  -2  -7   1    9.98    1.03
   2  -7  -1   10.31    1.20
  -2   7   1   11.74    1.16
   2   7  -1   10.50    1.03
  -2   7   1   10.65    1.07
  -2   7   1   10.85    1.35
  -2   7   1   12.62    1.35
   1  -7  -1    3.53    0.50
  -1  -7   1    2.97    0.47
  -1   7   1    2.33    0.33
  -1   7   1    2.99    0.39
  -1   7   1    3.84    0.55
   1   7  -1    2.14    0.32
   0  -7   1    9.27    0.95
   0  -7  -1    9.80    1.00
   0  -7   1   10.80    0.98
   0   7   1    9.96    0.94
   0   7   1    9.67    0.96
   0   7  -1    9.76    0.96
  -1  -7  -1   16.56    1.61
   1  -7   1   17.21    1.57
  -1   7  -1   17.55    1.59
   1   7   1   15.09    1.53
  -1   7  -1   16.45    1.66
   1   7   1   15.86    1.67
  -2  -7  -1   33.67    3.37
   2  -7   1   33.49    3.24
   2  -7   1   35.52    3.90
  -2  -7  -1   34.08    3.19
   2   7   1   34.56    3.43
  -2   7  -1   34.94    3.34
   2   7   1   38.68    4.02
  -2   7  -1   35.87    3.85
  -2   7  -1   35.65    3.34
  -3  -7  -1   10.19    0.99
  -3  -7  -1    6.03    1.31
   3  -7   1    8.63    1.01
   3  -7   1    9.87    1.19
  -3  -7  -1   10.65    1.49
  -3  -7  -1    9.56    0.94
  -3   7  -1    9.79    0.97
  -3   7  -1    8.21    1.34
   3   7   1    8.84    0.99
  -3   7  -1    9.41    1.32
  -4  -7  -1   24.03    2.93
  -4  -7  -1   25.80    2.36
  -4  -7  -1   23.36    2.30
   4  -7   1   25.79    2.83
  -4  -7  -1   21.98    2.56
  -4   7  -1   24.77    2.35
  -4   7  -1   25.36    2.41
  -4   7  -1   21.79    2.95
  -5  -7  -1  105.93   11.04
   5  -7   1  107.92   11.19
  -5  -7  -1   95.99    9.20
  -5  -7  -1  101.34    9.76
  -5   7  -1  101.98    9.60
  -5   7  -1  106.75    9.70
  -5   7  -1   91.71   11.06
  -6  -7  -1    2.40    0.38
   6  -7   1    1.68    0.55
  -6   7  -1    1.86    0.97
  -6   7  -1    1.33    0.30
   7  -7   1   -0.27    0.42
  -7   7  -1    0.36    0.20
  -7   7  -1    0.56    0.29
  -7   7  -1   -0.09    1.19
  -7   7  -1    0.61    0.43
  -8   7  -1    0.61    0.36
  -8   7  -1    0.95    0.25
  -8   7  -1    1.06    0.54
  -8   7  -1    0.60    0.21
  -8   7  -1    1.32    0.35
  -9   7  -1    2.65    0.53
  -9   7  -1    2.23    0.46
 -10   7  -1    0.14    0.39
 -10   8   1    1.07    0.43
  -9   8   1   14.90    1.49
  -9   8   1   12.18    1.36
  -9   8   1   12.87    1.20
  -8   8   1   12.51    1.36
  -8   8   1   13.26    1.20
  -8   8   1   13.82    1.46
  -8   8   1   12.94    1.44
   7  -8  -1   26.14    3.33
  -7   8   1   29.82    2.73
  -7   8   1   26.17    2.67
   6  -8  -1   10.08    1.47
  -6  -8   1    9.68    1.18
  -6   8   1    9.47    1.05
  -6   8   1   10.14    1.03
  -6   8   1    9.07    2.14
  -5  -8   1   18.28    2.41
  -5  -8   1   14.46    2.16
  -5  -8   1   23.23    2.01
  -5  -8   1   18.91    1.96
  -5   8   1   21.01    1.98
   5   8  -1   22.29    1.96
  -5   8   1   20.00    2.06
  -5   8   1   15.89    2.82
  -4  -8   1    3.40    0.51
   4  -8  -1    4.02    0.71
  -4  -8   1    1.97    0.82
  -4  -8   1    3.94    0.72
  -4   8   1    4.27    0.46
  -4   8   1    3.48    0.51
   4   8  -1    3.52    0.50
  -4   8   1    4.54    0.78
  -4   8   1    3.88    0.98
  -3  -8   1   83.87    7.88
  -3  -8   1   75.97    9.26
  -3  -8   1   79.26    7.56
   3  -8  -1   80.86    7.76
   3   8  -1   84.28    9.13
  -3   8   1   73.54    9.03
   3   8  -1   88.19    7.56
  -3   8   1  100.03    9.27
  -3   8   1   87.88    7.95
  -2  -8   1   43.77    4.43
  -2  -8   1   50.09    4.22
   2  -8  -1   43.10    4.37
  -2  -8   1   45.81    5.46
  -2   8   1   49.78    4.33
  -2   8   1   46.23    4.43
   2   8  -1   47.58    4.22
   2   8  -1   46.35    4.39
  -2   8   1   44.33    5.05
  -1  -8   1    0.49    0.29
   1  -8  -1    0.81    0.32
  -1  -8   1    1.04    0.18
  -1   8   1    0.74    0.24
   1   8  -1    0.48    0.17
  -1   8   1    0.51    0.14
  -1   8   1    0.99    0.34
   0  -8   1   21.85    2.00
   0  -8  -1   20.08    2.01
   0  -8   1   19.61    2.01
   0   8   1   23.89    2.39
   0   8   1   21.07    1.95
   0   8  -1   21.06    1.97
   0   8   1   21.32    2.01
   1  -8   1   23.82    2.65
   1  -8   1   24.87    2.18
  -1  -8  -1   25.25    2.14
  -1  -8  -1   23.57    2.23
  -1   8  -1   23.36    2.57
  -1   8  -1   23.59    2.23
  -1   8  -1   23.63    2.25
   1   8   1   20.95    2.24
   1   8   1   24.26    2.78
   1   8   1   20.47    2.14
  -2  -8  -1   26.37    2.42
  -2  -8  -1   24.53    2.58
   2  -8   1   25.73    2.97
   2  -8   1   26.75    2.47
  -2   8  -1   28.45    2.64
   2   8   1   27.41    2.43
   2   8   1   32.10    3.21
  -2   8  -1   25.81    2.94
  -2   8  -1   26.22    2.52
   2   8   1   21.35    2.67
  -3  -8  -1    1.84    0.79
  -3  -8  -1    1.52    0.32
   3  -8   1    2.32    0.41
   3  -8   1    2.80    0.51
  -3   8  -1    1.78    0.32
  -3   8  -1    2.83    0.74
  -3   8  -1    2.15    0.62
  -4  -8  -1    6.75    0.82
   4  -8   1    5.97    1.00
  -4  -8  -1    9.70    0.81
  -4  -8  -1    3.98    1.06
  -4  -8  -1    7.85    1.28
  -4   8  -1    6.89    0.80
  -4   8  -1    6.93    0.75
  -4   8  -1    6.17    1.29
  -5  -8  -1    8.85    0.93
  -5  -8  -1    7.61    1.44
  -5  -8  -1    7.12    0.89
   5  -8   1    7.52    1.16
   5   8   1    8.20    0.93
  -5   8  -1    8.46    0.85
  -5   8  -1    8.39    0.94
  -5   8  -1    6.85    1.42
   6  -8   1    0.75    0.44
  -6  -8  -1    0.50    0.26
  -6   8  -1    0.95    0.31
  -6   8  -1   -0.14    0.83
  -6   8  -1    0.89    0.22
  -6   8  -1    0.86    0.24
   7  -8   1   10.45    1.71
  -7   8  -1    9.95    1.45
  -7   8  -1   12.91    1.27
  -7   8  -1   14.81    1.35
  -7   8  -1   13.14    2.33
  -8   8  -1    4.14    0.53
  -8   8  -1    4.20    0.81
  -8   8  -1    4.47    0.47
  -8   8  -1    3.62    0.82
  -8   8  -1    4.06    0.58
  -8   8  -1    3.20    0.59
  -9   8  -1    4.14    0.46
  -9   8  -1    5.76    0.75
  -9   8  -1    4.41    0.64
 -10   8  -1    4.73    0.71
 -10   9   1    5.42    0.72
 -10   9   1    4.13    0.58
  -9   9   1    2.42    0.54
  -9   9   1    2.87    0.44
  -9   9   1    2.82    0.51
  -9   9   1    3.19    0.36
  -8   9   1    0.88    0.28
  -8   9   1    0.72    0.18
  -8   9   1    0.89    0.33
  -8   9   1    0.49    0.33
   7  -9  -1   38.31    5.10
  -7   9   1   47.20    4.29
  -7   9   1   44.93    4.25
  -6  -9   1    1.31    0.45
   6  -9  -1    1.72    0.60
  -6   9   1    1.37    1.28
  -6   9   1    1.84    0.33
  -6   9   1    1.88    0.31
  -5  -9   1   86.52    7.93
  -5  -9   1   84.01    7.53
   5  -9  -1   84.72    9.17
  -5   9   1   67.32    9.20
   5   9  -1   80.53    7.50
  -5   9   1   78.76    7.90
  -5   9   1   88.70    7.82
  -4  -9   1   19.10    2.51
  -4  -9   1   22.58    2.59
   4  -9  -1   23.39    2.43
  -4  -9   1   23.08    2.27
  -4  -9   1   24.07    2.35
  -4   9   1   26.41    2.32
  -4   9   1   25.99    2.39
  -4   9   1   19.71    2.96
   4   9  -1   25.67    2.27
  -3  -9   1   19.89    1.96
  -3  -9   1   17.08    1.62
   3  -9  -1   15.82    1.76
  -3  -9   1   15.87    2.12
  -3   9   1   15.36    2.09
   3   9  -1   17.41    1.61
  -3   9   1   17.48    1.69
  -2  -9   1   11.52    1.68
   2  -9  -1    8.64    1.18
  -2  -9   1    8.32    1.16
   2  -9  -1    7.53    1.08
  -2  -9   1   10.69    0.94
  -2   9   1    8.74    0.95
  -2   9   1    9.24    1.24
  -2   9   1   10.86    1.18
   2   9  -1    9.44    0.92
  -1  -9   1    2.27    0.35
  -1  -9   1    3.23    0.48
   1  -9  -1    3.29    0.51
   1  -9  -1    2.77    0.48
  -1   9   1    2.23    0.33
  -1   9   1    2.76    0.54
   1   9  -1    3.85    0.38
   0  -9  -1   41.61    4.23
   0  -9   1   38.95    5.11
   0  -9   1   47.29    4.22
   0  -9   1   43.33    4.32
   0   9  -1   49.10    4.18
   0   9   1   47.45    4.15
   0   9   1   52.52    4.97
   0   9   1   47.01    4.33
   1  -9   1  356.97   32.59
  -1  -9  -1  386.73   32.25
  -1  -9  -1  357.39   32.64
   1  -9   1  360.42   39.09
  -1   9  -1  388.07   32.35
   1   9   1  404.96   38.02
   1   9   1  323.88   32.25
  -1   9  -1  354.04   33.93
  -1   9  -1  367.28   37.91
   1   9   1  327.16   33.92
   2  -9   1    4.81    0.59
   2  -9   1    4.65    0.73
  -2  -9  -1    4.52    0.53
  -2  -9  -1    5.41    0.78
  -2   9  -1    5.23    0.53
   2   9   1    6.51    1.09
  -2   9  -1    5.31    0.80
  -2   9  -1    4.04    0.81
   2   9   1    3.63    0.53
  -3  -9  -1  232.25   21.72
  -3  -9  -1  228.39   22.23
   3  -9   1  227.51   21.96
   3  -9   1  267.68   26.35
   3   9   1  258.31   21.74
  -3   9  -1  253.24   21.96
   3   9   1  245.80   25.71
  -3   9  -1  255.20   22.86
  -3   9  -1  216.90   25.62
  -4  -9  -1   -0.92    0.62
   4  -9   1    0.40    0.32
  -4  -9  -1    0.60    0.26
  -4  -9  -1    0.49    0.19
  -4   9  -1    0.78    0.24
   4   9   1    0.73    0.29
  -4   9  -1    0.20    0.62
  -4   9  -1    0.78    0.18
  -5  -9  -1   28.52    2.74
  -5  -9  -1   27.66    2.85
   5  -9   1   30.26    3.37
   5   9   1   28.37    2.76
  -5   9  -1   28.28    2.86
  -5   9  -1   29.81    2.79
  -5   9  -1   29.60    3.59
  -6  -9  -1   16.45    1.61
  -6  -9  -1   15.19    1.60
   6  -9   1   16.19    1.98
  -6   9  -1   14.57    1.54
  -6   9  -1   13.32    2.35
  -6   9  -1   15.05    1.52
   7  -9   1   19.72    2.72
  -7   9  -1   20.19    3.25
  -7   9  -1   18.12    2.34
  -7   9  -1   25.26    2.23
  -7   9  -1   23.77    2.17
  -8   9  -1    0.10    0.21
  -8   9  -1    0.26    0.31
  -8   9  -1    0.18    0.17
  -8   9  -1    0.55    0.49
  -8   9  -1    0.36    0.29
  -8   9  -1    1.21    0.57
  -9   9  -1    0.85    0.33
  -9   9  -1    0.71    0.25
  -9   9  -1    0.12    0.14
  -9   9  -1    0.26    0.36
 -10   9  -1    0.64    0.41
 -10  10   1    3.71    0.56
 -10  10   1    1.58    0.36
  -9  10   1    0.86    0.21
  -9  10   1    1.09    0.31
  -9  10   1    1.68    0.40
  -8  10   1    0.21    0.24
  -8  10   1    0.09    0.14
  -8  10   1    0.55    0.33
  -8  10   1    0.48    0.30
   7 -10  -1    2.71    0.86
  -7  10   1    4.32    0.59
  -7  10   1    3.23    0.74
  -7  10   1    3.78    0.52
  -7  10   1    3.24    1.98
  -6 -10   1   18.14    1.75
  -6 -10   1   19.37    1.96
   6 -10  -1   20.42    2.44
  -6  10   1   19.82    3.08
  -6  10   1   15.38    2.07
  -6  10   1   20.97    1.91
  -6  10   1   20.79    1.92
  -5 -10   1    0.53    0.49
  -5 -10   1    0.28    0.17
  -5 -10   1    0.36    0.71
   5 -10  -1    0.19    0.38
  -5 -10   1    0.11    0.24
   5  10  -1    0.08    0.23
  -5  10   1    0.10    0.22
  -5  10   1    0.09    0.15
  -5  10   1    0.88    0.90
  -4 -10   1  168.76   18.42
   4 -10  -1  181.51   17.49
   4 -10  -1  190.96   20.89
  -4 -10   1  179.40   17.64
  -4 -10   1  199.46   17.22
  -4 -10   1  204.40   18.27
  -4  10   1  161.26   20.43
   4  10  -1  213.40   17.22
  -4  10   1  214.21   18.03
  -3 -10   1    1.45    0.31
   3 -10  -1    0.79    0.46
   3 -10  -1    1.77    0.47
  -3 -10   1    2.87    0.70
  -3 -10   1    1.86    0.64
  -3  10   1    1.78    0.60
   3  10  -1    2.09    0.32
  -3  10   1    2.06    0.32
  -2 -10   1  100.57   10.17
   2 -10  -1   84.45    8.26
  -2 -10   1   93.76    8.10
  -2 -10   1   99.12    8.36
   2 -10  -1   88.25    9.85
   2  10  -1   86.10    9.55
  -2  10   1   82.24    9.60
   2  10  -1   93.32    8.10
  -2  10   1   85.28    8.50
  -2  10   1   93.70    8.28
   1 -10  -1   47.00    5.41
  -1 -10   1   56.12    5.84
  -1 -10   1   50.55    4.56
   1 -10  -1   51.56    4.56
  -1 -10   1   51.12    4.43
   1  10  -1   43.35    4.43
   1  10  -1   47.23    5.22
  -1  10   1   46.35    4.64
  -1  10   1   52.32    5.30
  -1  10   1   51.36    4.48
   0 -10   1  400.59   40.17
   0 -10  -1  405.19   38.62
   0 -10   1  368.67   46.31
   0 -10   1  466.41   38.61
   0 -10  -1  462.76   38.18
   0  10   1  401.62   40.17
   0  10  -1  449.08   44.86
   0  10   1  443.31   38.20
   0  10  -1  460.48   38.22
   1 -10   1    5.29    0.64
   1 -10   1    6.29    0.88
  -1 -10  -1    6.08    0.73
  -1 -10  -1    6.27    0.62
   1  10   1    5.78    0.97
   1  10   1    5.72    0.61
   1  10   1    5.44    0.57
  -1  10  -1    7.23    0.83
  -1  10  -1    6.92    0.80
  -1  10  -1    5.33    0.60
  -2 -10  -1  107.29    9.57
  -2 -10  -1  106.16    9.80
   2 -10   1  107.29   11.64
   2 -10   1   99.96    9.68
   2  10   1  107.71    9.58
  -2  10  -1  101.81   10.05
   2  10   1  126.22   11.49
  -2  10  -1  102.78   11.32
  -3 -10  -1  135.78   12.84
  -3 -10  -1  143.43   13.28
   3 -10   1  136.21   12.99
   3 -10   1  146.69   15.61
   3  10   1  149.82   12.87
  -3  10  -1  147.61   13.51
   3  10   1  153.76   15.31
  -3  10  -1  147.67   13.10
  -3  10  -1  130.39   15.21
  -4 -10  -1    0.93    0.83
   4 -10   1    1.94    0.51
  -4 -10  -1    0.70    0.60
  -4 -10  -1    2.12    0.33
  -4 -10  -1    1.72    0.36
   4  10   1    2.36    0.42
  -4  10  -1    1.40    0.33
  -4  10  -1    1.70    0.27
  -4  10  -1    1.55    0.73
   4  10   1    1.88    0.75
   5 -10   1    0.58    0.40
  -5 -10  -1    0.48    0.29
  -5 -10  -1    0.90    0.25
  -5  10  -1    0.40    0.25
  -5  10  -1    0.92    0.73
  -5  10  -1    0.29    0.17
   5  10   1    0.56    0.32
  -6 -10  -1    2.03    0.40
   6 -10   1    1.20    0.55
  -6 -10  -1    2.42    0.30
  -6 -10  -1    1.08    0.45
  -6  10  -1    2.51    0.35
  -6  10  -1    1.72    0.39
  -6  10  -1    1.89    0.36
  -6  10  -1    2.07    0.93
   7 -10   1   23.16    3.19
  -7  10  -1   27.67    3.61
  -7  10  -1   31.90    2.66
  -7  10  -1   27.93    2.59
  -7  10  -1   21.56    2.76
  -8  10  -1   12.59    1.10
  -8  10  -1   11.15    1.21
  -8  10  -1   10.98    1.40
  -8  10  -1   11.18    1.28
  -8  10  -1   12.37    1.33
  -8  10  -1   10.40    1.42
  -9  10  -1    7.07    0.71
  -9  10  -1    7.91    0.96
  -9  10  -1    7.01    0.83
  -9  10  -1    9.39    1.14
 -10  10  -1    6.22    0.84
 -10  11   1    1.17    0.31
 -10  11   1    1.32    0.45
  -9  11   1    0.32    0.27
  -9  11   1    0.69    0.35
  -9  11   1    0.04    0.16
  -8  11   1    0.44    0.35
  -8  11   1    1.05    0.20
  -8  11   1    1.01    0.35
  -8  11   1    0.97    0.29
   7 -11  -1   33.44    4.58
  -7  11   1   33.85    4.08
  -7  11   1   38.66    5.58
  -7  11   1   43.46    3.82
  -7  11   1   41.84    3.79
  -6 -11   1    8.39    0.84
  -6 -11   1    8.19    1.09
   6 -11  -1    8.28    1.39
  -6 -11   1    7.83    1.27
  -6  11   1    6.70    1.80
  -6  11   1    6.90    1.07
  -6  11   1    9.47    0.95
  -6  11   1   10.11    0.97
   5 -11  -1   12.43    1.51
  -5 -11   1   11.66    1.13
  -5 -11   1   11.18    1.16
  -5 -11   1    7.74    1.38
  -5 -11   1    8.26    1.60
  -5  11   1    9.20    1.94
  -5  11   1   10.34    1.10
   5  11  -1   10.74    1.15
  -5  11   1   10.46    1.18
   4 -11  -1    0.77    0.38
  -4 -11   1    0.16    0.24
  -4 -11   1    0.92    0.56
  -4 -11   1    0.28    0.15
  -4 -11   1    0.16    0.39
  -4  11   1    0.12    0.19
  -4  11   1    0.32    0.15
  -4  11   1    0.67    0.71
   4  11  -1   -0.03    0.20
   3 -11  -1   18.71    2.28
  -3 -11   1   22.31    2.17
  -3 -11   1   23.36    2.46
   3 -11  -1   22.48    2.70
  -3  11   1   21.98    2.74
  -3  11   1   24.89    2.27
   3  11  -1   25.91    2.18
  -2 -11   1    3.78    0.46
  -2 -11   1    5.12    1.14
  -2 -11   1    3.37    0.66
   2 -11  -1    3.27    0.59
   2 -11  -1    3.17    0.63
   2  11  -1    3.40    0.63
  -2  11   1    3.95    0.74
   2  11  -1    4.12    0.48
  -2  11   1    3.54    0.72
  -2  11   1    3.59    0.46
   1 -11  -1   28.37    2.49
  -1 -11   1   25.00    2.47
   1 -11  -1   25.41    2.94
  -1 -11   1   31.68    3.37
  -1 -11   1   25.92    2.36
  -1  11   1   26.55    2.42
   1  11  -1   24.27    2.37
   1  11  -1   24.86    2.79
  -1  11   1   23.39    2.45
  -1  11   1   27.56    2.89
   0 -11   1    7.31    1.27
   0 -11   1    8.98    0.87
   0 -11  -1    9.04    0.88
   0 -11   1   10.60    0.96
   0 -11   1    8.53    0.88
   0  11   1    8.85    0.88
   0  11   1    9.21    0.91
   0  11  -1    8.98    0.93
   0  11  -1    9.20    1.10
   0  11   1    9.94    1.19
  -1 -11  -1    9.71    1.04
  -1 -11  -1    9.90    0.94
   1 -11   1    9.50    0.97
   1 -11   1    9.53    1.27
  -1  11  -1    8.89    1.17
   1  11   1    9.81    1.32
  -1  11  -1   10.12    1.09
   1  11   1    9.17    0.95
  -1  11  -1    9.13    0.94
  -2 -11  -1   20.59    1.86
  -2 -11  -1   22.18    2.06
   2 -11   1   19.91    1.90
   2 -11   1   19.89    2.33
  -2  11  -1   20.14    1.92
  -2  11  -1   14.47    1.95
  -2  11  -1   19.35    2.29
   2  11   1   21.92    2.50
   2  11   1   19.50    1.87
  -3 -11  -1   14.91    1.84
   3 -11   1   15.12    1.76
   3 -11   1   13.36    1.41
  -3 -11  -1   12.28    1.36
  -3  11  -1   15.33    1.81
   3  11   1   17.97    2.03
   3  11   1   13.92    1.39
  -3  11  -1   13.71    1.41
  -3  11  -1   13.65    1.81
  -4 -11  -1    6.50    1.12
  -4 -11  -1    7.49    0.87
   4 -11   1    8.71    1.16
  -4 -11  -1    6.81    1.36
  -4 -11  -1    6.85    0.79
  -4  11  -1    6.96    0.82
  -4  11  -1    8.11    1.38
   4  11   1    7.59    0.84
   4  11   1    6.16    1.22
  -4  11  -1    6.62    0.75
   5 -11   1    4.87    0.90
  -5 -11  -1    5.24    0.70
  -5 -11  -1    4.84    0.62
  -5  11  -1    4.82    0.67
  -5  11  -1    4.40    0.55
  -5  11  -1    4.17    1.21
   5  11   1    4.64    0.70
  -6 -11  -1    4.03    0.59
   6 -11   1    4.84    0.94
  -6 -11  -1    3.53    0.68
  -6 -11  -1    4.67    0.48
  -6  11  -1    2.84    0.57
  -6  11  -1    2.80    1.08
  -6  11  -1    3.59    0.54
  -6  11  -1    5.01    0.54
   7 -11   1    5.03    1.05
  -7  11  -1    5.12    0.62
  -7  11  -1    3.72    0.67
  -7  11  -1    2.53    1.19
  -7  11  -1    6.46    0.71
  -8  11  -1    0.81    0.46
  -8  11  -1    0.79    0.34
  -8  11  -1    0.81    0.34
  -8  11  -1    0.24    0.23
  -8  11  -1    0.68    0.20
  -8  11  -1    0.23    0.39
  -9  11  -1   -0.36    0.50
  -9  11  -1    0.20    0.16
  -9  11  -1    0.20    0.24
  -9  11  -1    0.18    0.33
  -9  11  -1    0.03    0.56
 -10  11  -1    0.33    0.41
 -10  12   1    0.69    0.42
  -9  12   1    8.28    0.96
  -9  12   1    7.33    0.83
  -9  12   1    6.34    0.71
  -8  12   1    0.23    0.14
  -8  12   1    0.01    0.23
  -8  12   1    0.20    0.34
  -8  12   1    0.56    0.32
   7 -12  -1    2.93    0.84
  -7 -12   1    2.95    0.39
  -7  12   1    2.70    0.63
  -7  12   1    2.44    0.43
  -7  12   1    2.72    0.47
  -7  12   1    1.76    1.57
  -6 -12   1   24.86    2.34
  -6 -12   1   21.68    2.78
  -6 -12   1   27.11    2.57
   6 -12  -1   27.17    3.17
  -6  12   1   28.62    2.54
  -6  12   1   29.46    2.55
  -6  12   1   21.96    2.70
  -6  12   1   19.02    3.47
  -5 -12   1    3.61    0.44
  -5 -12   1    1.23    0.57
   5 -12  -1    2.70    0.69
  -5 -12   1    2.56    0.51
  -5 -12   1    2.31    0.87
  -5  12   1    2.57    0.49
   5  12  -1    2.48    0.48
  -5  12   1    2.85    0.40
  -5  12   1    2.50    1.22
   4 -12  -1   23.49    2.70
  -4 -12   1   29.00    2.92
   4 -12  -1   27.42    3.21
  -4 -12   1   27.64    2.59
  -4 -12   1   28.12    2.68
  -4 -12   1   28.17    2.87
  -4  12   1   25.45    2.69
   4  12  -1   27.61    2.58
  -4  12   1   24.11    3.34
  -4  12   1   29.27    2.63
   3 -12  -1  111.47   11.26
  -3 -12   1  116.05   11.87
  -3 -12   1  132.08   11.07
  -3 -12   1  126.56   11.43
   3 -12  -1  120.03   13.46
  -3 -12   1  124.31   11.73
  -3  12   1  115.35   13.16
  -3  12   1  126.21   11.63
   3  12  -1  132.42   11.07
  -2 -12   1    1.27    0.88
   2 -12  -1    2.35    0.50
  -2 -12   1    1.70    0.52
   2 -12  -1    1.89    0.48
  -2 -12   1    1.94    0.32
   2  12  -1    2.35    0.35
  -2  12   1    1.96    0.31
   2  12  -1    1.76    0.46
  -2  12   1    2.07    0.55
  -2  12   1    1.98    0.56
  -1 -12   1  143.14   12.47
   1 -12  -1  133.65   14.91
   1 -12  -1  142.99   12.47
  -1 -12   1  136.55   12.25
  -1  12   1  147.07   14.50
   1  12  -1  126.38   14.40
  -1  12   1  122.17   12.87
   1  12  -1  139.47   12.28
  -1  12   1  145.94   12.33
   0 -12   1    6.37    0.70
   0 -12   1    5.48    0.61
   0 -12  -1    6.96    0.62
   0 -12  -1    5.79    0.92
   0 -12   1    5.11    1.00
   0 -12  -1    6.02    0.75
   0  12   1    6.41    0.89
   0  12   1    5.40    0.59
   0  12  -1    5.81    0.67
   0  12  -1    5.49    0.79
   0  12   1    6.19    0.65
   1 -12   1   39.03    4.61
  -1 -12  -1   40.84    3.72
   1 -12   1   40.27    3.79
  -1 -12  -1   42.52    3.85
  -1  12  -1   40.53    4.43
  -1  12  -1   38.42    3.88
   1  12   1   41.66    3.74
  -1  12  -1   43.16    3.84
   1  12   1   43.35    4.51
   2 -12   1   13.06    1.32
   2 -12   1   13.90    1.69
  -2 -12  -1   14.01    1.29
  -2 -12  -1   13.54    1.47
  -2  12  -1   13.08    1.31
  -2  12  -1   10.70    1.38
  -2  12  -1   13.67    1.63
   2  12   1   13.91    1.84
   2  12   1   12.31    1.29
   3 -12   1    0.46    0.35
   3 -12   1    0.23    0.26
  -3 -12  -1    0.12    0.15
  -3 -12  -1   -0.15    0.19
  -3 -12  -1   -0.22    0.56
   3  12   1    0.44    0.24
  -3  12  -1    0.01    0.18
  -3  12  -1    0.84    0.72
  -3  12  -1    0.13    0.43
   3  12   1    1.30    0.65
  -4 -12  -1    5.65    0.64
  -4 -12  -1    5.03    0.95
  -4 -12  -1    4.14    1.11
  -4 -12  -1    5.42    0.69
   4 -12   1    6.25    0.97
   4  12   1    5.51    1.11
   4  12   1    4.42    0.68
  -4  12  -1    5.41    1.16
  -4  12  -1    5.35    0.68
  -4  12  -1    4.74    0.57
   5 -12   1   12.89    1.60
  -5 -12  -1   11.82    1.25
  -5 -12  -1   11.02    1.22
  -5  12  -1   11.59    1.17
  -5  12  -1   10.64    1.92
  -5  12  -1   11.36    1.26
   5  12   1   10.68    1.25
   6 -12   1    1.99    0.66
  -6 -12  -1    1.96    0.41
  -6 -12  -1    1.67    0.51
  -6 -12  -1    2.58    0.32
  -6  12  -1    1.65    0.35
  -6  12  -1    2.52    0.46
  -6  12  -1    2.07    0.34
  -6  12  -1    2.47    1.06
   7 -12   1    0.60    0.59
  -7  12  -1    1.52    1.00
  -7  12  -1    1.14    0.33
  -7  12  -1    1.04    0.28
  -7  12  -1    0.92    0.35
  -8  12  -1    0.38    0.31
  -8  12  -1    0.26    0.17
  -8  12  -1   -0.04    0.35
  -8  12  -1    0.75    0.26
  -8  12  -1    0.81    0.35
  -8  12  -1   -0.01    0.39
  -9  12  -1    0.02    0.45
  -9  12  -1    0.11    0.23
  -9  12  -1   -0.10    0.16
  -9  12  -1   -0.51    0.47
  -9  12  -1   -0.01    0.33
 -10  12  -1    1.54    0.47
  -9  13   1   11.63    1.10
  -9  13   1   11.38    1.36
  -9  13   1   11.85    1.25
  -8  13   1    0.33    0.32
  -8  13   1   -0.13    0.57
  -8  13   1    0.01    0.14
  -8  13   1    0.28    0.31
  -8  13   1   -0.12    0.25
  -7 -13   1   32.50    3.02
   7 -13  -1   31.56    4.03
  -7  13   1   36.80    3.26
  -7  13   1   41.17    3.30
  -7  13   1   25.05    3.46
  -7  13   1   28.16    4.53
  -6 -13   1   20.42    2.03
   6 -13  -1   18.38    2.50
  -6 -13   1   19.11    1.80
  -6 -13   1   22.76    2.01
  -6 -13   1   14.73    2.26
  -6  13   1   20.91    1.96
  -6  13   1   23.16    1.98
  -6  13   1   14.83    2.09
  -6  13   1   15.30    2.89
  -5 -13   1   -0.10    0.25
   5 -13  -1   -0.04    0.40
  -5 -13   1    0.06    0.64
  -5 -13   1   -0.12    0.44
  -5 -13   1    0.46    0.20
   5  13  -1    0.42    0.30
  -5  13   1    0.26    0.18
  -5  13   1   -0.86    0.88
  -5  13   1    0.05    0.25
   4 -13  -1   49.11    5.11
   4 -13  -1   37.41    4.22
  -4 -13   1   46.12    4.48
  -4 -13   1   49.19    4.15
  -4 -13   1   45.64    4.46
   4 -13  -1   38.66    4.36
  -4 -13   1   46.08    4.32
  -4  13   1   42.94    4.31
   4  13  -1   45.49    4.13
  -4  13   1   46.75    4.25
  -4  13   1   43.38    5.16
   3 -13  -1    6.22    1.03
  -3 -13   1   10.52    1.35
  -3 -13   1   10.20    0.94
  -3 -13   1    7.83    0.93
   3 -13  -1    8.07    1.26
  -3 -13   1   10.25    1.20
  -3  13   1    8.95    0.95
   3  13  -1    9.34    0.95
  -3  13   1    7.89    1.36
  -3  13   1    8.69    0.89
  -2 -13   1  219.25   19.24
   2 -13  -1  212.29   19.17
   2 -13  -1  214.41   22.95
  -2 -13   1  219.34   18.89
  -2  13   1  198.38   22.29
   2  13  -1  204.37   22.19
  -2  13   1  206.59   19.86
   2  13  -1  215.36   18.90
  -1 -13   1    3.93    1.03
  -1 -13   1    4.34    0.46
  -1 -13   1    4.18    0.59
   1 -13  -1    2.82    0.54
   1 -13  -1    2.68    0.63
   1  13  -1    4.03    0.48
  -1  13   1    2.98    0.40
   1  13  -1    3.11    0.54
  -1  13   1    3.20    0.53
  -1  13   1    2.79    0.64
   0 -13   1   48.06    4.30
   0 -13  -1   52.56    4.45
   0 -13  -1   40.71    5.31
   0 -13   1   49.73    4.41
   0 -13  -1   48.15    4.30
   0 -13   1   39.14    5.36
   0  13   1   47.01    4.34
   0  13   1   48.09    5.16
   0  13  -1   52.69    4.38
   0  13  -1   47.87    5.10
  -1 -13  -1   68.86    6.32
   1 -13   1   69.60    6.28
  -1 -13  -1   69.03    6.17
   1 -13   1   64.48    7.58
  -1  13  -1   68.60    7.31
  -1  13  -1   78.84    6.31
   1  13   1   66.96    7.36
   1  13   1   64.86    6.19
  -1  13  -1   66.79    6.46
  -2 -13  -1   28.78    2.65
   2 -13   1   26.57    3.08
   2 -13   1   25.98    2.49
  -2 -13  -1   27.50    2.45
  -2  13  -1   25.39    2.53
  -2  13  -1   25.50    2.98
   2  13   1   26.03    2.46
  -2  13  -1   25.45    2.55
   2  13   1   24.89    3.05
  -3 -13  -1  160.93   16.65
  -3 -13  -1  165.87   16.81
   3 -13   1  171.47   15.85
  -3 -13  -1  182.94   15.69
   3 -13   1  178.91   19.07
  -3 -13  -1  178.99   16.14
   3  13   1  162.14   15.69
   3  13   1  203.69   18.64
  -3  13  -1  176.33   18.57
  -3  13  -1  175.86   16.48
   4 -13   1    2.58    0.66
  -4 -13  -1    0.95    0.88
  -4 -13  -1    1.28    0.66
  -4 -13  -1    1.87    0.34
  -4 -13  -1    2.57    0.45
  -4  13  -1    2.34    0.32
   4  13   1    1.78    0.78
   4  13   1    1.56    0.39
  -4  13  -1    2.14    0.39
  -4  13  -1    3.97    0.96
  -5 -13  -1    2.63    0.50
   5 -13   1    3.59    0.74
  -5 -13  -1    2.29    0.41
  -5  13  -1    2.52    0.38
  -5  13  -1    1.49    0.91
   6 -13   1   25.34    3.25
  -6 -13  -1   31.30    2.74
  -6 -13  -1   24.47    2.64
  -6 -13  -1   25.36    2.44
  -6  13  -1   29.25    2.65
  -6  13  -1   25.51    3.49
  -6  13  -1   23.19    2.78
  -6  13  -1   29.13    2.63
   7 -13   1    1.61    0.71
  -7 -13  -1    0.87    0.24
  -7 -13  -1    1.14    0.38
  -7  13  -1    0.17    0.95
  -7  13  -1    0.87    0.35
  -7  13  -1    1.18    0.31
  -7  13  -1    1.07    0.35
  -8  13  -1   22.18    2.28
  -8  13  -1   24.50    2.03
  -8  13  -1   23.52    2.37
  -8  13  -1   18.56    2.23
  -8  13  -1   23.34    2.23
  -8  13  -1   20.93    2.40
  -9  13  -1    0.34    0.46
  -9  13  -1    0.86    0.23
  -9  13  -1    1.37    0.40
  -9  13  -1    0.91    0.28
  -9  13  -1    0.38    0.45
  -9  14   1    1.08    0.35
  -9  14   1    1.33    0.43
  -9  14   1    1.14    0.25
  -8  14   1    2.13    0.45
  -8  14   1    2.69    0.69
  -8  14   1    2.26    0.49
  -8  14   1    2.18    0.29
  -8  14   1    1.20    0.38
  -8  14   1    0.45    0.62
  -7 -14   1   -0.15    0.18
  -7  14   1    0.07    0.37
  -7  14   1    0.25    0.29
  -7  14   1    0.35    0.26
  -6 -14   1   17.48    1.68
  -6 -14   1   16.56    2.21
   6 -14  -1   18.99    2.40
  -6 -14   1   18.11    1.91
  -6 -14   1   21.38    1.89
  -6  14   1   20.31    1.85
  -6  14   1   15.92    2.84
  -6  14   1   14.48    1.97
  -6  14   1   18.32    1.84
  -5 -14   1    1.90    0.45
  -5 -14   1    0.79    0.53
   5 -14  -1    1.33    0.58
  -5 -14   1    1.88    0.33
  -5 -14   1    1.95    0.82
  -5  14   1    1.69    0.31
   5  14  -1    1.68    0.43
  -5  14   1    0.06    0.90
  -5  14   1    1.89    0.31
   4 -14  -1    0.20    0.39
   4 -14  -1    0.02    0.25
  -4 -14   1    0.09    0.37
  -4 -14   1    0.44    0.27
   4 -14  -1    0.04    0.36
  -4 -14   1   -0.19    0.52
  -4 -14   1    0.20    0.16
  -4  14   1    0.06    0.20
  -4  14   1    0.03    0.13
   4  14  -1    0.41    0.25
  -4  14   1    0.28    0.63
  -3 -14   1   14.69    1.87
  -3 -14   1   14.50    1.73
   3 -14  -1   14.29    1.62
   3 -14  -1   15.59    1.62
  -3 -14   1   15.18    1.52
   3 -14  -1   17.33    1.98
  -3 -14   1   15.64    1.55
  -3  14   1   14.91    1.50
  -3  14   1   15.42    1.56
  -3  14   1   15.40    2.13
   3  14  -1   15.97    1.53
  -2 -14   1    1.16    0.35
  -2 -14   1    1.01    0.26
  -2 -14   1    1.13    0.21
  -2 -14   1    0.88    0.44
   2 -14  -1    1.39    0.48
   2 -14  -1    0.84    0.36
   2  14  -1    1.50    0.30
   2  14  -1    1.23    0.39
  -2  14   1    0.69    0.49
  -2  14   1    0.94    0.23
  -1 -14   1   38.27    3.47
   1 -14  -1   39.72    3.48
   1 -14  -1   34.58    4.15
  -1 -14   1   48.12    4.46
  -1 -14   1   36.19    3.33
  -1  14   1   40.03    3.44
   1  14  -1   34.38    3.93
  -1  14   1   32.82    3.46
  -1  14   1   35.58    4.03
   1  14  -1   34.44    3.36
   0 -14  -1  204.50   18.83
   0 -14   1  200.86   18.83
   0 -14  -1  217.46   19.13
   0 -14  -1  172.27   22.88
   0 -14   1  213.53   19.10
   0  14  -1  233.90   18.92
   0  14   1  224.59   18.90
   0  14  -1  206.63   22.16
   0  14   1  227.85   22.24
  -1 -14  -1  144.16   13.13
   1 -14   1  134.36   16.00
  -1 -14  -1  143.29   13.35
   1 -14   1  148.45   13.31
   1  14   1  146.99   13.16
   1  14   1  145.60   15.52
  -1  14  -1  143.39   15.48
  -1  14  -1  168.66   13.28
   2 -14   1   22.97    2.91
  -2 -14  -1   27.41    2.54
  -2 -14  -1   25.77    2.43
  -2 -14  -1   25.62    2.32
   2 -14   1   24.83    2.37
  -2  14  -1   23.20    2.39
  -2  14  -1   24.58    2.84
   2  14   1   22.53    2.89
  -2  14  -1   24.85    2.44
   2  14   1   24.82    2.34
  -3 -14  -1    8.67    1.17
   3 -14   1   10.30    1.28
   3 -14   1    8.28    0.95
  -3 -14  -1    7.76    0.90
  -3 -14  -1    9.07    1.34
  -3 -14  -1    8.03    0.91
   3  14   1    8.29    1.34
  -3  14  -1    8.05    0.85
  -3  14  -1    9.77    1.39
  -3  14  -1    8.29    0.91
   3  14   1    8.15    0.93
  -4 -14  -1   26.57    2.72
  -4 -14  -1   27.46    3.09
  -4 -14  -1   25.36    2.95
   4 -14   1   31.37    3.31
  -4 -14  -1   31.11    2.66
   4  14   1   27.54    2.65
  -4  14  -1   26.50    2.64
  -4  14  -1   25.33    2.71
  -4  14  -1   29.93    3.41
   5 -14   1    2.90    0.72
  -5 -14  -1    2.17    0.41
  -5 -14  -1    3.01    0.54
  -5  14  -1    1.98    0.44
  -5  14  -1    2.46    0.37
  -5  14  -1    1.55    1.00
  -5  14  -1    1.88    0.34
   6 -14   1   10.05    1.57
  -6 -14  -1    8.54    1.18
  -6 -14  -1    9.07    0.94
  -6 -14  -1   10.17    1.11
  -6  14  -1   10.07    1.89
  -6  14  -1    7.91    1.13
  -6  14  -1   11.62    1.06
  -6  14  -1    9.86    1.05
  -7 -14  -1    6.97    0.76
  -7 -14  -1    8.84    0.95
  -7  14  -1    8.31    0.87
  -7  14  -1    5.32    0.89
  -7  14  -1    7.87    0.88
  -8  14  -1    0.27    0.37
  -8  14  -1    0.34    0.18
  -8  14  -1   -0.38    0.31
  -8  14  -1    0.02    0.30
  -8  14  -1    0.47    0.26
  -8  14  -1    0.35    0.32
  -9  14  -1    2.26    0.54
  -9  14  -1    2.18    0.36
  -9  14  -1    2.90    0.52
  -9  14  -1    1.87    0.54
  -9  14  -1    3.00    0.43
  -9  15   1    0.23    0.19
  -9  15   1    0.40    0.30
  -9  15   1    0.35    0.40
  -8  15   1    3.16    0.75
  -8  15   1    3.38    0.63
  -8  15   1    5.07    0.51
  -8  15   1    5.04    0.64
  -8  15   1    2.52    0.74
  -8  15   1    5.29    0.68
  -7 -15   1    0.32    0.20
  -7  15   1    0.66    0.35
  -7  15   1    0.61    0.30
  -7  15   1    0.55    0.18
  -7  15   1    0.39    0.28
  -7  15   1    0.54    0.39
  -6 -15   1    6.99    0.75
   6 -15  -1    5.48    1.12
  -6 -15   1    6.07    0.90
  -6 -15   1    5.31    0.62
  -6 -15   1    4.34    0.98
  -6  15   1    5.10    0.84
  -6  15   1    5.38    1.68
  -6  15   1    6.39    0.72
  -6  15   1    6.25    0.75
  -5 -15   1    7.24    0.97
  -5 -15   1    7.97    0.86
  -5 -15   1    7.12    1.11
  -5 -15   1    7.01    0.73
   5 -15  -1    9.79    1.41
  -5  15   1    7.59    0.82
  -5  15   1    6.11    0.94
  -5  15   1    7.10    1.65
  -5  15   1    8.20    0.85
  -4 -15   1    7.05    0.80
   4 -15  -1    5.02    0.83
  -4 -15   1    7.19    1.21
  -4 -15   1    8.02    0.90
   4 -15  -1    7.62    1.01
  -4 -15   1    7.29    1.02
   4 -15  -1    7.57    1.24
  -4  15   1    8.78    1.55
  -4  15   1    7.41    0.76
   4  15  -1    6.62    0.85
  -4  15   1    7.20    0.85
  -3 -15   1    2.78    0.55
  -3 -15   1    2.43    0.42
   3 -15  -1    1.96    0.62
   3 -15  -1    1.72    0.49
  -3 -15   1    2.18    0.67
  -3 -15   1    2.40    0.35
   3 -15  -1    2.37    0.42
  -3  15   1    1.85    0.29
  -3  15   1    2.02    0.74
  -3  15   1    1.49    0.35
   3  15  -1    2.28    0.42
   2 -15  -1    0.80    0.31
  -2 -15   1    0.36    0.36
  -2 -15   1    0.29    0.22
  -2 -15   1    0.85    0.34
   2 -15  -1    0.64    0.39
   2 -15  -1    0.23    0.42
  -2  15   1    0.50    0.20
   2  15  -1    1.23    0.28
  -2  15   1    0.24    0.44
   1 -15  -1   13.49    1.82
  -1 -15   1   15.42    2.04
  -1 -15   1   14.95    1.50
  -1 -15   1   13.26    1.36
   1 -15  -1   13.80    1.48
  -1  15   1   13.45    1.74
   1  15  -1   13.21    1.63
  -1  15   1   16.04    1.51
   1  15  -1   14.66    1.41
   0 -15   1   12.76    1.29
   0 -15  -1   13.23    1.30
   0 -15  -1   15.20    1.45
   0 -15   1   12.43    1.88
   0 -15   1   12.67    1.38
   0  15  -1   13.67    1.60
   0  15   1   14.50    1.68
   0  15   1   13.91    1.37
   0  15  -1   14.45    1.40
   1 -15   1    0.17    0.41
  -1 -15  -1   -0.29    0.27
   1 -15   1    1.53    0.33
  -1 -15  -1    0.27    0.19
  -1  15  -1   -0.13    0.29
  -1  15  -1    0.11    0.37
   1  15   1   -0.37    0.32
   1  15   1    0.06    0.20
  -2 -15  -1  328.10   30.72
  -2 -15  -1  362.96   32.22
  -2 -15  -1  320.40   32.32
   2 -15   1  334.13   36.76
   2 -15   1  345.80   30.62
  -2 -15  -1  351.56   30.29
   2  15   1  341.02   30.30
   2  15   1  325.21   35.67
  -2  15  -1  340.19   31.84
  -2  15  -1  343.01   30.38
  -2  15  -1  334.50   35.65
  -3 -15  -1    2.39    0.40
  -3 -15  -1    4.33    0.90
  -3 -15  -1    3.14    0.50
   3 -15   1    2.27    0.66
  -3 -15  -1    2.68    0.64
   3 -15   1    2.46    0.47
  -3  15  -1    2.69    0.36
  -3  15  -1    3.07    0.76
   3  15   1    2.99    0.83
  -3  15  -1    3.50    0.46
   3  15   1    2.20    0.45
   4 -15   1   49.96    4.87
  -4 -15  -1   38.13    4.06
  -4 -15  -1   39.51    4.27
  -4 -15  -1   46.91    3.92
  -4 -15  -1   45.62    4.39
   4  15   1   40.12    3.90
  -4  15  -1   43.63    4.86
  -4  15  -1   37.99    4.04
  -4  15  -1   41.04    3.97
  -5 -15  -1   20.14    2.01
  -5 -15  -1   20.59    2.04
  -5 -15  -1   18.79    1.81
   5 -15   1   21.19    2.55
  -5  15  -1   19.30    1.96
  -5  15  -1   19.57    2.13
  -5  15  -1   20.74    1.98
  -5  15  -1   19.41    2.96
   6 -15   1   29.99    3.69
  -6 -15  -1   29.52    2.75
  -6 -15  -1   31.76    3.00
  -6  15  -1   28.49    3.86
  -6  15  -1   31.27    2.97
  -6  15  -1   27.89    3.14
  -6  15  -1   32.83    2.98
  -7 -15  -1    2.39    0.49
  -7 -15  -1    1.85    0.32
  -7 -15  -1    2.65    0.35
  -7  15  -1    0.93    0.40
  -7  15  -1    2.79    0.32
  -7  15  -1    2.04    0.43
  -7  15  -1    2.80    0.49
  -7  15  -1    2.17    0.39
  -7  15  -1    1.57    0.45
  -8  15  -1    2.33    0.47
  -8  15  -1    2.72    0.44
  -8  15  -1    2.67    0.35
  -8  15  -1    1.65    0.48
  -8  15  -1    3.04    0.51
  -8  15  -1    1.57    0.47
  -9  15  -1    0.13    0.39
  -9  15  -1    0.73    0.29
  -9  15  -1    0.65    0.41
  -9  15  -1    0.45    0.22
  -9  15  -1    0.27    0.37
  -9  16   1    1.19    0.46
  -9  16   1    0.86    0.35
  -9  16   1    0.98    0.25
  -8 -16   1    1.62    0.32
  -8  16   1    2.34    0.48
  -8  16   1    1.51    0.42
  -8  16   1    1.37    0.42
  -8  16   1    0.88    0.53
  -8  16   1    1.28    0.52
  -8  16   1    2.15    0.30
  -7 -16   1    4.06    0.53
  -7 -16   1    4.69    0.52
  -7  16   1    3.30    0.70
  -7  16   1    6.07    0.69
  -7  16   1    3.95    0.73
  -7  16   1    5.07    0.68
  -7  16   1    5.50    0.53
  -7  16   1    4.58    0.65
  -6 -16   1   -0.19    0.36
  -6 -16   1    0.60    0.28
   6 -16  -1    0.53    0.57
  -6 -16   1    0.15    0.15
  -6 -16   1    0.03    0.53
  -6  16   1    0.35    0.25
  -6  16   1   -0.27    0.30
  -6  16   1    0.44    0.25
  -6  16   1   -1.47    0.99
  -5 -16   1   48.55    4.55
   5 -16  -1   49.14    5.42
  -5 -16   1   45.22    4.71
  -5 -16   1   46.08    4.16
  -5 -16   1   46.98    4.38
  -5  16   1   46.93    4.46
  -5  16   1   41.50    4.73
  -5  16   1   47.75    5.66
  -5  16   1   48.09    4.48
  -4 -16   1    8.26    1.14
   4 -16  -1    8.02    0.96
  -4 -16   1   11.38    1.43
  -4 -16   1    9.23    0.98
   4 -16  -1    6.07    1.02
   4 -16  -1    8.10    1.31
  -4 -16   1    8.99    0.91
  -4  16   1    6.66    0.95
   4  16  -1    8.28    0.93
  -4  16   1    7.66    0.85
  -4  16   1    7.95    1.52
  -3 -16   1   10.11    1.04
  -3 -16   1   10.89    1.06
   3 -16  -1    7.80    1.14
  -3 -16   1    8.95    1.24
   3 -16  -1    9.82    1.46
  -3 -16   1   10.62    1.42
   3 -16  -1    8.92    1.09
  -3  16   1    9.38    1.05
   3  16  -1    9.95    1.06
  -3  16   1   10.19    1.56
  -3  16   1    9.77    0.98
   2 -16  -1   64.78    6.05
   2 -16  -1   62.59    7.01
  -2 -16   1   63.63    5.99
  -2 -16   1   60.88    5.67
  -2 -16   1   62.06    5.90
   2 -16  -1   60.08    5.82
  -2 -16   1   60.77    6.08
   2  16  -1   60.15    5.69
  -2  16   1   66.14    6.84
  -1 -16   1  138.42   12.43
  -1 -16   1  130.44   11.86
  -1 -16   1  126.54   11.64
   1 -16  -1  136.61   12.43
   1 -16  -1  127.79   11.85
   1 -16  -1  119.58   14.20
   1  16  -1  128.27   11.68
  -1  16   1  152.14   11.79
  -1  16   1  130.75   13.79
   1  16  -1  118.16   13.68
   1  16  -1  122.02   12.37
   0 -16  -1    1.18    0.27
   0 -16  -1    1.76    0.35
   0 -16   1   -0.12    0.51
   0 -16   1    1.31    0.37
   0 -16  -1    1.80    0.43
   0  16  -1    1.73    0.43
   0  16   1    1.96    0.39
   0  16   1    1.32    0.49
   0  16  -1    2.22    0.44
  -1 -16  -1    7.35    0.78
  -1 -16  -1    8.04    0.88
  -1 -16  -1    6.74    0.92
  -1 -16  -1    7.23    0.80
   1 -16   1    7.34    0.85
   1 -16   1    5.52    1.14
  -1  16  -1    7.80    1.00
   1  16   1    7.74    0.83
  -1  16  -1    6.91    1.05
   1  16   1    6.45    1.08
  -2 -16  -1   10.99    1.16
   2 -16   1   11.59    1.18
  -2 -16  -1    9.69    1.34
   2 -16   1   12.36    1.19
  -2 -16  -1   10.97    1.26
   2 -16   1    9.18    1.54
  -2 -16  -1   10.36    1.13
   2  16   1   10.65    1.54
  -2  16  -1   11.33    1.55
   2  16   1   10.21    1.15
  -2  16  -1   12.54    1.37
  -3 -16  -1   10.44    1.35
  -3 -16  -1   12.16    1.13
   3 -16   1    8.77    1.13
   3 -16   1   11.09    1.55
  -3 -16  -1    9.67    1.06
  -3 -16  -1   13.63    1.63
  -3  16  -1   10.78    1.09
   3  16   1    7.38    1.42
   3  16   1    8.25    1.06
  -3  16  -1   10.59    1.54
   4 -16   1   55.53    5.68
  -4 -16  -1   47.31    4.96
  -4 -16  -1   46.32    4.76
  -4 -16  -1   51.51    5.01
  -4 -16  -1   50.15    4.57
  -4  16  -1   46.35    4.66
  -4  16  -1   52.44    5.65
   5 -16   1   13.45    1.98
  -5 -16  -1   13.60    1.28
  -5 -16  -1   13.47    1.47
  -5 -16  -1   14.41    1.46
  -5 -16  -1   12.52    1.78
  -5  16  -1   12.01    1.51
  -5  16  -1   13.08    1.39
  -5  16  -1   13.18    2.23
  -5  16  -1   15.37    1.42
  -6 -16  -1    0.24    0.39
   6 -16   1   -0.49    0.50
  -6 -16  -1    0.69    0.19
  -6 -16  -1    0.37    0.29
  -6  16  -1    0.44    0.25
  -6  16  -1    0.15    0.28
  -6  16  -1    0.91    0.97
  -6  16  -1    0.85    0.28
  -7 -16  -1    0.46    0.21
  -7 -16  -1    0.58    0.36
  -7 -16  -1    1.01    0.25
  -7  16  -1    1.00    0.31
  -7  16  -1    0.62    0.31
  -7  16  -1    0.63    0.37
  -7  16  -1    0.56    0.36
  -7  16  -1    0.54    0.33
  -7  16  -1    0.47    0.18
  -8 -16  -1    6.54    0.68
  -8  16  -1    4.68    0.80
  -8  16  -1    4.52    0.79
  -8  16  -1    8.31    0.70
  -8  16  -1    6.61    0.89
  -8  16  -1    7.68    0.81
  -8  16  -1    6.25    0.85
  -9  16  -1    2.81    0.56
  -9  16  -1    2.78    0.40
  -9  16  -1    2.46    0.44
  -9  16  -1    3.07    0.56
  -9  16  -1    3.46    0.60
  -9  17   1   -0.11    0.41
  -9  17   1   -0.43    0.29
  -9  17   1   -0.08    0.19
  -8 -17   1    1.54    0.30
  -8  17   1    0.90    0.38
  -8  17   1    0.55    0.48
  -8  17   1    1.45    0.45
  -8  17   1    1.09    0.24
  -8  17   1    1.34    0.39
  -8  17   1    1.00    0.48
  -7 -17   1    0.07    0.19
  -7 -17   1    0.13    0.20
  -7  17   1    0.23    0.17
  -7  17   1    0.28    0.34
  -7  17   1    0.40    0.43
  -7  17   1   -0.01    0.28
  -7  17   1   -0.22    0.35
  -7  17   1    0.17    0.30
  -6 -17   1   13.54    1.30
  -6 -17   1   16.82    1.50
  -6 -17   1   14.18    1.79
  -6 -17   1   12.85    1.54
   6 -17  -1   12.06    1.97
  -6  17   1   11.87    1.59
  -6  17   1    8.07    2.27
  -6  17   1   14.31    1.44
  -6  17   1   14.43    1.44
  -5 -17   1   17.27    1.87
  -5 -17   1   16.02    1.69
  -5 -17   1   16.13    1.48
  -5 -17   1   16.36    1.66
   5 -17  -1   14.48    2.12
  -5  17   1   16.26    2.62
  -5  17   1   13.92    1.74
  -5  17   1   15.79    1.62
  -5  17   1   16.76    1.61
   4 -17  -1    6.86    1.17
  -4 -17   1    4.97    1.02
  -4 -17   1    5.77    0.76
   4 -17  -1    4.53    0.71
  -4 -17   1    5.01    0.85
  -4 -17   1    5.74    0.67
  -4  17   1    5.26    0.62
   4  17  -1    5.58    0.77
  -4  17   1    5.73    1.26
  -4  17   1    5.03    0.74
  -3 -17   1    6.86    1.15
  -3 -17   1    7.78    1.01
   3 -17  -1    5.82    0.91
  -3 -17   1    7.78    0.83
   3 -17  -1    6.47    1.19
   3 -17  -1    6.48    0.87
  -3 -17   1    7.06    0.79
  -3  17   1    8.02    1.35
   3  17  -1    6.75    0.86
   2 -17  -1  251.44   22.87
  -2 -17   1  243.42   21.44
  -2 -17   1  229.59   22.90
  -2 -17   1  253.08   22.79
   2 -17  -1  232.09   26.08
  -2 -17   1  226.26   21.80
   2 -17  -1  228.92   21.74
  -2  17   1  255.57   25.36
   2  17  -1  233.54   21.46
   1 -17  -1    1.13    0.40
   1 -17  -1    0.97    0.53
   1 -17  -1    1.13    0.31
  -1 -17   1    1.15    0.30
  -1 -17   1    0.47    0.25
  -1 -17   1    0.40    0.34
   1  17  -1    0.91    0.31
   1  17  -1    0.89    0.37
  -1  17   1    0.74    0.43
   1  17  -1    1.19    0.25
  -1  17   1    1.17    0.48
   0 -17  -1   64.05    5.65
   0 -17   1   62.05    5.63
   0 -17   1   46.31    6.54
   0 -17   1   55.64    5.40
   0 -17  -1   55.50    5.43
   0  17  -1   60.79    5.37
   0  17   1   57.68    6.32
   0  17   1   65.52    5.37
   0  17  -1   56.66    5.61
   0  17  -1   54.30    6.24
   1 -17   1   64.16    6.16
  -1 -17  -1   58.83    6.20
  -1 -17  -1   62.16    6.45
   1 -17   1   61.57    7.48
  -1 -17  -1   64.47    6.05
  -1 -17  -1   64.84    6.41
   1 -17   1   72.12    6.44
  -1  17  -1   78.84    6.25
   1  17   1   67.79    7.21
  -1  17  -1   67.53    7.18
  -1  17  -1   69.97    6.48
   1  17   1   70.26    6.11
  -2 -17  -1    6.58    0.84
  -2 -17  -1    6.32    0.75
  -2 -17  -1    6.46    0.95
   2 -17   1    5.69    0.70
   2 -17   1    5.04    1.02
  -2 -17  -1    6.77    0.70
   2 -17   1    5.16    0.75
   2  17   1    5.17    0.74
  -2  17  -1    4.71    0.96
  -2  17  -1    6.43    0.92
   2  17   1    5.01    0.97
  -3 -17  -1    0.51    0.45
  -3 -17  -1    0.65    0.32
  -3 -17  -1    0.57    0.23
   3 -17   1    0.64    0.53
  -3 -17  -1    0.52    0.62
   3  17   1    0.41    0.30
  -3  17  -1    1.07    0.60
   3  17   1    0.29    0.56
   4 -17   1   35.68    3.97
  -4 -17  -1   36.16    3.18
  -4 -17  -1   30.62    3.25
  -4 -17  -1   34.20    3.50
  -4 -17  -1   33.79    3.59
  -4  17  -1   37.00    4.02
  -4  17  -1   30.32    3.17
  -5 -17  -1   23.50    2.79
  -5 -17  -1   24.50    2.50
  -5 -17  -1   24.91    2.29
   5 -17   1   24.37    3.12
  -5 -17  -1   25.41    2.54
  -5  17  -1   26.38    3.41
  -5  17  -1   23.91    2.64
  -5  17  -1   25.33    2.47
  -5  17  -1   27.04    2.49
   6 -17   1    1.22    0.72
  -6 -17  -1    2.58    0.63
  -6 -17  -1    3.15    0.51
  -6 -17  -1    2.32    0.34
  -6  17  -1    2.35    0.42
  -6  17  -1    2.14    1.07
  -6  17  -1    2.12    0.40
  -6  17  -1    1.98    0.45
  -7 -17  -1    2.38    0.47
  -7 -17  -1    1.98    0.34
  -7 -17  -1    2.42    0.36
  -7  17  -1    1.83    0.44
  -7  17  -1    2.16    0.31
  -7  17  -1    2.63    0.49
  -7  17  -1    2.35    0.44
  -7  17  -1    1.45    0.43
  -7  17  -1    3.06    0.52
  -8 -17  -1   20.67    2.03
  -8 -17  -1   21.79    1.95
  -8  17  -1   20.74    2.33
  -8  17  -1   22.09    2.20
  -8  17  -1   25.02    1.99
  -8  17  -1   19.71    2.17
  -8  17  -1   25.83    2.36
  -8  17  -1   19.03    2.21
  -9  17  -1    0.14    0.35
  -9  17  -1    0.30    0.38
  -9  17  -1    0.45    0.43
  -9  17  -1    0.49    0.23
  -9  18   1   -0.09    0.30
  -9  18   1   -1.16    0.49
  -9  18   1    0.25    0.21
  -9  18   1    0.11    0.41
  -8 -18   1    2.67    0.40
  -8 -18   1    2.94    0.38
  -8  18   1    3.20    0.52
  -8  18   1    2.85    0.61
  -8  18   1    1.71    0.57
  -8  18   1    2.63    0.55
  -8  18   1    2.83    0.38
  -7 -18   1    0.69    0.24
  -7 -18   1    0.53    0.23
  -7 -18   1    1.18    0.19
  -7  18   1    0.98    0.22
  -7  18   1    1.06    0.44
  -7  18   1    1.40    0.42
  -7  18   1    0.30    0.30
  -7  18   1    0.40    0.38
  -7  18   1    1.67    0.40
  -6 -18   1    0.01    0.40
  -6 -18   1    0.49    0.55
  -6 -18   1    0.88    0.22
  -6 -18   1    0.72    0.30
   6 -18  -1    0.70    0.64
  -6  18   1    1.34    0.36
  -6  18   1    0.02    1.11
  -6  18   1    0.17    0.37
  -6  18   1    2.24    0.38
  -5 -18   1    2.04    0.30
   5 -18  -1    1.36    0.72
  -5 -18   1    1.04    0.47
  -5 -18   1    2.52    0.65
  -5 -18   1    2.84    0.44
  -5  18   1    1.29    1.09
  -5  18   1    2.08    0.36
  -5  18   1    2.74    0.50
  -5  18   1    2.41    0.41
  -4 -18   1   10.05    1.21
   4 -18  -1    6.82    0.97
   4 -18  -1    7.90    1.36
  -4 -18   1    8.97    0.81
  -4 -18   1    8.38    0.93
  -4 -18   1    9.29    1.00
  -4  18   1    7.89    0.88
  -4  18   1    7.75    0.98
  -4  18   1    7.33    0.76
  -4  18   1   10.21    1.68
  -3 -18   1   13.51    1.32
  -3 -18   1   12.38    1.30
   3 -18  -1   13.63    1.81
  -3 -18   1   13.12    1.48
   3 -18  -1   11.83    1.37
   3 -18  -1   11.81    1.42
  -3 -18   1   11.44    1.62
   3  18  -1   11.85    1.31
  -3  18   1   13.66    1.95
  -2 -18   1    1.32    0.47
   2 -18  -1    0.53    0.29
  -2 -18   1    0.65    0.28
   2 -18  -1    0.68    0.38
   2 -18  -1    0.34    0.47
  -2 -18   1    0.94    0.35
   2  18  -1    0.50    0.29
  -2  18   1    0.56    0.51
   1 -18  -1   40.81    3.99
   1 -18  -1   45.40    4.12
  -1 -18   1   38.90    3.99
  -1 -18   1   45.45    4.13
  -1 -18   1   40.02    3.84
  -1  18   1   49.25    4.05
  -1  18   1   43.19    4.67
   1  18  -1   40.45    3.90
   1  18  -1   38.63    4.54
   1  18  -1   39.27    4.06
   0 -18   1   -0.97    0.45
   0 -18   1    0.47    0.30
   0 -18  -1   -0.01    0.30
   0 -18  -1    0.42    0.29
   0 -18   1    0.44    0.23
   0  18   1    0.38    0.39
   0  18   1    0.47    0.24
   0  18   1    0.80    0.34
   0  18  -1    0.70    0.25
   0  18  -1    0.99    0.37
   0  18  -1    0.37    0.33
  -1 -18  -1  157.47   15.87
   1 -18   1  176.17   15.84
   1 -18   1  151.36   19.04
  -1 -18  -1  164.17   16.66
  -1 -18  -1  176.86   15.62
   1 -18   1  188.76   16.65
  -1 -18  -1  174.95   16.60
  -1  18  -1  189.40   16.68
   1  18   1  170.68   18.43
  -1  18  -1  166.31   18.41
  -1  18  -1  202.04   15.82
   1  18   1  172.90   15.67
  -2 -18  -1   82.99    8.49
  -2 -18  -1   97.25    8.29
   2 -18   1   86.93    8.39
   2 -18   1   88.37   10.17
   2 -18   1   97.39    8.79
  -2 -18  -1   86.05    8.84
  -2 -18  -1   98.39    8.77
  -2  18  -1   94.82    9.85
   2  18   1   88.01    9.81
   2  18   1   89.43    8.31
   3 -18   1   19.57    2.37
  -3 -18  -1   19.11    2.05
  -3 -18  -1   18.35    1.84
  -3 -18  -1   20.03    2.18
  -3 -18  -1   19.36    1.82
  -3  18  -1   17.01    2.29
   3  18   1   17.16    2.26
   3  18   1   15.28    1.80
  -4 -18  -1    7.76    1.16
  -4 -18  -1    7.62    0.71
   4 -18   1    6.93    1.27
  -4 -18  -1    7.99    0.97
  -4 -18  -1    6.42    0.85
  -4  18  -1    7.11    1.38
  -4  18  -1    6.31    0.66
  -4  18  -1    6.45    0.85
  -4  18  -1    7.36    0.83
  -5 -18  -1    3.78    0.43
  -5 -18  -1    3.56    0.68
   5 -18   1    2.64    0.84
  -5 -18  -1    2.00    0.77
  -5 -18  -1    2.57    0.51
  -5  18  -1    4.16    0.53
  -5  18  -1    3.18    0.56
  -5  18  -1    4.23    1.27
  -5  18  -1    3.38    0.50
  -6 -18  -1    3.73    0.50
   6 -18   1    3.25    0.92
  -6 -18  -1    4.88    0.82
  -6 -18  -1    5.40    0.69
  -6  18  -1    4.83    0.69
  -6  18  -1    3.34    1.28
  -6  18  -1    4.12    0.59
  -6  18  -1    4.27    0.60
  -7 -18  -1    6.37    0.86
  -7 -18  -1    6.06    0.71
  -7 -18  -1    5.73    0.63
  -7 -18  -1    7.94    0.71
  -7  18  -1    5.81    0.86
  -7  18  -1    5.81    0.83
  -7  18  -1    7.32    0.86
  -7  18  -1    7.94    0.70
  -7  18  -1    6.92    0.83
  -7  18  -1    7.47    0.90
  -8 -18  -1    2.22    0.35
  -8 -18  -1    2.13    0.36
  -8  18  -1    2.37    0.35
  -8  18  -1    2.62    0.53
  -8  18  -1    2.02    0.48
  -8  18  -1    2.60    0.51
  -8  18  -1    2.23    0.45
  -9  18  -1    1.65    0.30
  -9  18  -1    1.33    0.48
  -9  18  -1    0.57    0.37
  -9  18  -1    1.12    0.40
  -9  19   1    0.93    0.35
  -9  19   1   -0.38    0.50
  -9  19   1    1.19    0.48
  -9  19   1    1.75    0.28
  -8 -19   1    3.57    0.43
  -8 -19   1    3.74    0.46
  -8  19   1    4.29    0.65
  -8  19   1    3.24    0.56
  -8  19   1    3.05    0.63
  -8  19   1    3.36    0.43
  -8  19   1    2.64    0.62
  -7 -19   1   10.96    0.96
  -7 -19   1   10.12    0.93
  -7 -19   1    8.83    0.98
  -7  19   1   11.49    1.15
  -7  19   1    8.17    1.15
  -7  19   1    8.99    1.11
  -7  19   1   11.56    0.98
  -7  19   1   11.08    1.25
  -7  19   1    7.37    1.20
  -6 -19   1    0.41    0.28
  -6 -19   1    0.07    0.18
  -6 -19   1   -0.14    0.48
  -6  19   1    0.24    0.30
  -6  19   1   -0.21    0.21
  -6  19   1   -0.30    0.32
  -5 -19   1   14.57    1.42
  -5 -19   1   12.27    1.24
  -5 -19   1   15.64    1.65
  -5 -19   1   12.57    1.46
   5 -19  -1   12.08    1.95
  -5  19   1   13.14    2.33
  -5  19   1   12.77    1.39
  -5  19   1   11.51    1.50
  -5  19   1   14.13    1.37
  -4 -19   1   18.34    1.53
   4 -19  -1   14.91    1.74
   4 -19  -1   17.08    2.24
  -4 -19   1   17.63    1.91
  -4 -19   1   16.18    1.70
  -4 -19   1   17.75    1.72
  -4  19   1   15.62    1.42
  -4  19   1   15.23    1.68
  -4  19   1   15.38    1.78
  -4  19   1   21.35    2.50
   3 -19  -1   13.94    1.92
   3 -19  -1   11.96    1.51
  -3 -19   1   14.76    1.42
  -3 -19   1   13.72    1.59
   3 -19  -1   12.34    1.46
  -3 -19   1   15.05    1.43
  -3 -19   1   11.33    1.70
   3  19  -1   13.28    1.44
  -3  19   1   15.26    2.08
  -2 -19   1    1.26    0.50
  -2 -19   1    0.79    0.35
   2 -19  -1    1.28    0.47
  -2 -19   1    1.11    0.33
   2 -19  -1    1.85    0.39
   2 -19  -1    0.53    0.52
  -2  19   1    2.13    0.70
   2  19  -1    1.59    0.37
  -1 -19   1   45.49    4.33
  -1 -19   1   46.23    4.45
   1 -19  -1   49.17    4.46
   1 -19  -1   46.16    4.32
  -1 -19   1   45.69    4.17
   1  19  -1   44.31    4.41
  -1  19   1   46.71    5.06
   1  19  -1   42.28    4.22
   1  19  -1   42.31    4.92
   0 -19   1   14.47    2.25
   0 -19   1   18.38    1.76
   0 -19  -1   19.33    1.79
   0 -19  -1   16.10    1.78
   0 -19   1   15.23    1.74
   0  19   1   17.14    1.76
   0  19   1   16.40    2.07
   0  19  -1   16.90    1.76
   0  19   1   18.18    1.77
   0  19  -1   16.51    2.01
   0  19  -1   16.04    1.75
   1 -19   1   50.66    4.51
  -1 -19  -1   46.81    4.24
   1 -19   1   42.99    4.34
   1 -19   1   36.05    5.27
  -1 -19  -1   42.53    4.52
  -1 -19  -1   39.96    4.38
  -1  19  -1   54.43    4.47
  -1  19  -1   50.78    4.57
  -1  19  -1   48.88    5.08
   1  19   1   47.52    4.31
   1  19   1   46.93    5.10
   2 -19   1  128.67   13.59
  -2 -19  -1  112.92   11.31
   2 -19   1  113.32   11.20
  -2 -19  -1  134.45   11.09
   2 -19   1  128.24   11.76
  -2 -19  -1  126.40   11.73
  -2 -19  -1  112.75   11.80
   2  19   1  119.19   13.08
  -2  19  -1  126.48   13.12
  -3 -19  -1    4.83    0.71
  -3 -19  -1    4.88    0.97
   3 -19   1    3.74    0.96
  -3 -19  -1    5.10    0.63
  -3 -19  -1    4.01    0.79
   3  19   1    3.99    0.67
  -3  19  -1    5.07    1.02
   4 -19   1   37.96    4.64
  -4 -19  -1   40.74    3.76
  -4 -19  -1   43.72    3.54
  -4 -19  -1   40.12    4.08
  -4 -19  -1   36.21    3.86
  -4  19  -1   37.84    3.25
  -4  19  -1   39.97    4.66
  -4  19  -1   37.69    3.99
  -4  19  -1   39.91    3.82
  -5 -19  -1    4.73    0.69
   5 -19   1    4.02    1.03
  -5 -19  -1    5.35    0.99
  -5 -19  -1    5.47    0.57
  -5 -19  -1    6.28    0.89
  -5  19  -1    5.11    0.65
  -5  19  -1    4.55    0.71
  -5  19  -1    5.50    1.41
  -5  19  -1    5.28    0.69
  -6 -19  -1    7.70    0.84
  -6 -19  -1   11.40    1.05
  -6  19  -1    6.76    1.01
  -6  19  -1    7.89    0.97
  -6  19  -1    8.76    0.96
  -7 -19  -1    1.99    0.44
  -7 -19  -1    1.65    0.22
  -7 -19  -1    1.08    0.29
  -7 -19  -1    1.28    0.29
  -7  19  -1    2.19    0.46
  -7  19  -1    1.45    0.40
  -7  19  -1    1.49    0.38
  -7  19  -1    1.21    0.27
  -7  19  -1    2.23    0.47
  -7  19  -1    2.47    0.50
  -8 -19  -1    2.18    0.38
  -8 -19  -1    2.39    0.36
  -8  19  -1    2.85    0.52
  -8  19  -1    3.01    0.57
  -8  19  -1    3.10    0.49
  -8  19  -1    2.58    0.37
  -8  19  -1    2.29    0.49
  -9  19  -1   -0.22    0.42
  -9  19  -1   -0.35    0.29
  -9  19  -1    0.46    0.23
  -9  19  -1   -0.06    0.33
  -9  20   1    1.05    0.52
  -9  20   1    2.30    0.33
  -9  20   1    1.60    0.52
  -8 -20   1    0.64    0.24
  -8 -20   1    0.20    0.21
  -8  20   1    0.02    0.34
  -8  20   1    0.41    0.20
  -8  20   1   -0.76    0.34
  -8  20   1   -0.03    0.40
  -8  20   1   -0.42    0.36
  -7 -20   1    3.33    0.46
  -7 -20   1    4.13    0.46
  -7 -20   1    3.30    0.39
  -7  20   1    3.48    0.59
  -7  20   1    3.83    0.66
  -7  20   1    4.41    0.66
  -7  20   1    3.35    0.43
  -7  20   1    4.39    0.71
  -7  20   1    3.18    0.57
  -6 -20   1   17.47    1.41
  -6 -20   1   15.80    1.84
  -6 -20   1   14.01    1.38
  -6 -20   1   15.56    1.44
  -6  20   1   14.77    1.69
  -6  20   1   14.84    1.59
  -6  20   1   15.38    1.61
  -6  20   1   14.56    1.77
  -5 -20   1   12.40    1.34
  -5 -20   1    9.87    1.00
  -5 -20   1   11.17    1.16
   5 -20  -1    7.54    1.55
  -5 -20   1   13.41    1.47
  -5  20   1   10.05    1.10
  -5  20   1    9.64    1.25
  -5  20   1    9.79    1.13
  -5  20   1   10.72    2.13
  -4 -20   1    9.36    1.00
   4 -20  -1    7.50    1.43
  -4 -20   1   10.26    1.28
   4 -20  -1    8.36    1.04
  -4 -20   1    7.62    1.08
  -4 -20   1   10.02    0.87
  -4  20   1    8.35    1.66
  -4  20   1    8.68    0.99
  -4  20   1    8.22    1.04
  -4  20   1    8.16    0.81
   3 -20  -1    1.80    0.43
   3 -20  -1    2.16    0.58
  -3 -20   1    2.26    0.47
  -3 -20   1    2.54    0.57
   3 -20  -1    2.14    0.74
  -3  20   1    2.30    0.84
  -2 -20   1   32.29    2.96
  -2 -20   1   32.74    3.18
   2 -20  -1   27.74    3.06
   2 -20  -1   33.35    3.80
   2 -20  -1   34.52    3.15
  -2 -20   1   29.82    3.17
   2  20  -1   27.91    2.98
   2  20  -1   30.34    3.10
  -2  20   1   35.71    3.72
  -1 -20   1    8.51    0.91
  -1 -20   1    5.94    0.96
   1 -20  -1    7.46    0.93
  -1 -20   1    6.38    0.83
   1 -20  -1    7.25    1.00
   1  20  -1    6.76    1.03
   1  20  -1    6.62    0.93
  -1  20   1    7.47    1.21
   1  20  -1    8.07    0.88
   0 -20  -1    0.59    0.40
   0 -20  -1    0.97    0.33
   0 -20   1    0.14    0.33
   0 -20   1    0.31    0.27
   0  20  -1    0.78    0.40
   0  20  -1    0.53    0.28
   0  20  -1    1.23    0.42
   0  20   1    1.19    0.45
   0  20   1   -0.06    0.44
   0  20   1    1.05    0.32
  -1 -20  -1    1.47    0.50
   1 -20   1    1.83    0.46
  -1 -20  -1    1.75    0.38
  -1 -20  -1    1.55    0.41
   1 -20   1    2.12    0.40
   1 -20   1    1.27    0.67
  -1  20  -1    2.40    0.61
  -1  20  -1    2.64    0.66
   1  20   1    1.65    0.59
  -1  20  -1    2.34    0.50
   1  20   1    2.49    0.49
  -2 -20  -1    2.34    0.43
  -2 -20  -1    0.69    0.47
   2 -20   1    0.86    0.39
   2 -20   1    1.37    0.64
  -2 -20  -1    0.94    0.27
  -2 -20  -1    0.63    0.33
   2 -20   1    1.43    0.33
   2  20   1    0.45    0.33
  -2  20  -1    1.22    0.55
   2  20   1    0.77    0.54
   3 -20   1    1.32    0.67
  -3 -20  -1    2.03    0.55
  -3 -20  -1    2.04    0.39
  -3 -20  -1    1.97    0.46
  -3  20  -1    2.56    0.77
  -4 -20  -1    8.45    1.08
  -4 -20  -1   10.50    1.23
  -4 -20  -1   11.02    0.97
  -4 -20  -1    8.68    1.36
   4 -20   1   10.42    1.62
  -4  20  -1   10.20    1.13
  -4  20  -1   10.24    1.09
  -4  20  -1    8.63    1.66
  -4  20  -1    9.34    0.89
  -5 -20  -1    0.76    0.21
  -5 -20  -1    0.60    0.29
  -5 -20  -1    0.13    0.41
   5 -20   1    0.00    0.55
  -5 -20  -1    0.85    0.64
  -5  20  -1    0.66    0.34
  -5  20  -1    0.57    0.31
  -5  20  -1   -0.54    0.86
  -6 -20  -1    0.50    0.25
  -6 -20  -1    0.74    0.17
  -6 -20  -1    0.73    0.34
  -6 -20  -1    0.94    0.24
  -6  20  -1    0.94    0.35
  -6  20  -1    0.64    0.37
  -6  20  -1    0.57    0.31
  -6  20  -1    1.24    0.23
  -6  20  -1    0.35    0.31
  -7 -20  -1    7.36    0.76
  -7 -20  -1    8.37    0.83
  -7 -20  -1    8.69    0.85
  -7 -20  -1    6.49    0.97
  -7  20  -1    8.67    1.04
  -7  20  -1    9.42    0.83
  -7  20  -1    8.12    0.98
  -7  20  -1    6.80    0.96
  -7  20  -1    9.90    1.13
  -7  20  -1    9.21    0.98
  -8 -20  -1    9.31    0.90
  -8 -20  -1    9.16    0.93
  -8  20  -1    9.45    1.11
  -8  20  -1    6.56    1.00
  -8  20  -1   10.58    1.22
  -8  20  -1   10.70    0.92
  -9 -20  -1    0.65    0.22
   9 -20   1   -0.11    0.21
  -9  20  -1   -0.66    0.31
  -9  20  -1    0.32    0.21
  -8 -21   1    2.40    0.34
  -8 -21   1    2.40    0.36
  -8  21   1    2.46    0.57
  -8  21   1    2.04    0.48
  -8  21   1    2.67    0.35
  -8  21   1    1.84    0.49
  -8  21   1    0.77    0.46
  -7 -21   1   13.10    1.20
  -7 -21   1   14.40    1.24
  -7 -21   1   13.66    1.27
  -7  21   1   12.94    1.55
  -7  21   1   11.09    1.41
  -7  21   1   14.24    1.56
   7  21  -1   12.25    1.50
  -7  21   1   11.49    1.44
  -7  21   1   13.98    1.24
  -7  21   1   12.99    1.44
  -6 -21   1   14.47    1.48
  -6 -21   1   13.74    1.31
  -6 -21   1   15.23    1.28
  -6 -21   1   15.15    1.72
  -6 -21   1   12.86    1.25
  -6  21   1   13.73    1.57
  -6  21   1   12.52    1.45
  -6  21   1   14.21    1.29
  -6  21   1   14.29    1.57
  -6  21   1   13.12    1.47
  -6  21   1   12.49    1.62
  -5 -21   1   27.21    2.55
   5 -21  -1   20.37    2.92
  -5 -21   1   25.63    2.11
  -5 -21   1   21.96    2.33
  -5  21   1   21.46    2.29
  -5  21   1   19.17    3.25
  -5  21   1   20.74    2.44
  -4 -21   1   51.04    5.12
   4 -21  -1   49.43    5.91
  -4 -21   1   50.79    4.78
  -4 -21   1   59.68    4.57
   4 -21  -1   47.28    4.99
  -4  21   1   50.76    4.21
  -4  21   1   50.24    4.92
  -4  21   1   54.38    6.02
  -4  21   1   44.87    5.14
   3 -21  -1    3.42    0.60
  -3 -21   1    4.14    0.44
   3 -21  -1    5.30    1.06
  -3 -21   1    3.24    0.61
  -3 -21   1    4.11    0.74
  -3  21   1    3.76    0.56
  -3  21   1    3.88    1.03
  -3  21   1    3.59    0.41
   2 -21  -1    0.97    0.35
  -2 -21   1    1.89    0.39
   2 -21  -1    1.12    0.47
  -2 -21   1    0.41    0.47
  -2 -21   1    1.18    0.41
  -2  21   1    0.43    0.61
   2  21  -1    1.84    0.36
   2  21  -1    2.03    0.47
  -1 -21   1    0.17    0.37
   1 -21  -1    0.29    0.29
  -1 -21   1   -0.16    0.25
   1 -21  -1    0.13    0.37
   1  21  -1   -0.07    0.30
   1  21  -1    0.25    0.22
  -1  21   1    0.81    0.55
   0 -21   1   11.10    1.35
   0 -21  -1   12.42    1.41
   0 -21   1   12.99    1.35
   0 -21  -1   12.44    1.36
   0  21   1   12.07    1.39
   0  21  -1   10.92    1.53
   0  21  -1   11.92    1.34
   0  21   1   11.92    1.34
   0  21   1   13.17    1.66
   0  21  -1   12.80    1.41
   1 -21   1   13.65    1.39
  -1 -21  -1   12.02    1.42
  -1 -21  -1   10.58    1.50
   1 -21   1   12.34    1.93
  -1 -21  -1   12.15    1.32
   1 -21   1   11.77    1.42
   1  21   1   13.78    1.44
   1  21   1   13.53    1.40
  -1  21  -1   15.58    1.72
   1  21   1   13.18    1.70
  -1  21  -1   15.21    1.54
  -1  21  -1   12.21    1.67
  -2 -21  -1    5.88    0.84
   2 -21   1    5.16    1.14
   2 -21   1    6.27    0.74
  -2 -21  -1    6.40    0.73
  -2 -21  -1    5.46    0.76
  -2 -21  -1    4.29    0.88
   2 -21   1    4.99    0.80
   2  21   1    5.81    1.06
   2  21   1    5.92    0.85
  -2  21  -1    8.94    1.24
  -3 -21  -1   54.54    4.85
   3 -21   1   52.54    6.04
  -3 -21  -1   50.64    5.05
  -3 -21  -1   57.39    4.64
  -3 -21  -1   46.47    5.17
  -3  21  -1   52.58    5.86
  -3  21  -1   51.48    4.27
  -3  21  -1   48.50    5.19
   4 -21   1   39.23    4.90
  -4 -21  -1   42.37    4.27
  -4 -21  -1   37.99    4.06
  -4 -21  -1   42.46    3.96
  -4 -21  -1   45.07    3.73
  -4  21  -1   41.22    4.89
  -4  21  -1   40.94    4.03
  -4  21  -1   40.56    3.42
  -4  21  -1   41.59    4.20
  -5 -21  -1    0.71    0.65
   5 -21   1    0.91    0.64
  -5 -21  -1    1.02    0.51
  -5 -21  -1    2.19    0.29
  -5 -21  -1    1.01    0.35
  -5  21  -1    0.41    0.32
  -5  21  -1    0.58    0.33
  -5  21  -1   -0.24    0.91
  -6 -21  -1    2.03    0.27
  -6 -21  -1    2.79    0.38
  -6 -21  -1    2.12    0.46
  -6 -21  -1    1.74    0.33
  -6  21  -1    2.13    0.46
  -6  21  -1    2.26    0.46
  -6  21  -1    1.88    0.46
  -6  21  -1    1.91    0.31
  -6  21  -1    2.21    0.52
  -7 -21  -1    0.44    0.24
  -7 -21  -1   -0.03    0.29
  -7 -21  -1   -0.03    0.21
  -7 -21  -1    0.25    0.13
  -7  21  -1   -0.60    0.29
  -7  21  -1    0.19    0.19
  -7  21  -1   -0.09    0.31
  -7  21  -1    0.57    0.36
  -7  21  -1   -0.15    0.40
  -7  21  -1    0.30    0.33
  -8 -21  -1    2.39    0.39
  -8 -21  -1    2.97    0.39
  -8  21  -1    3.05    0.60
  -8  21  -1    2.28    0.48
  -8  21  -1    2.94    0.38
  -8 -22   1    1.28    0.28
  -8 -22   1    1.03    0.27
  -8  22   1    1.08    0.26
  -8  22   1    1.48    0.52
  -8  22   1    0.71    0.41
  -8  22   1    2.05    0.45
  -8  22   1    1.17    0.45
  -7 -22   1    0.61    0.24
  -7 -22   1    0.36    0.23
  -7 -22   1   -0.03    0.13
  -7  22   1   -0.04    0.18
  -7  22   1   -0.46    0.33
  -7  22   1    0.40    0.33
  -7  22   1    0.06    0.37
   7  22  -1    0.16    0.37
  -7  22   1    0.15    0.42
  -7  22   1    0.36    0.38
  -6 -22   1    0.34    0.22
  -6 -22   1    0.57    0.17
  -6 -22   1    0.34    0.22
  -6 -22   1    1.46    0.43
  -6 -22   1    0.72    0.56
  -6  22   1    1.00    0.47
   6  22  -1    0.23    0.38
  -6  22   1    0.06    0.34
  -6  22   1    0.54    0.39
   5 -22  -1    3.02    0.89
  -5 -22   1    3.44    0.69
  -5 -22   1    5.11    0.83
  -5 -22   1    3.40    0.43
  -5  22   1    2.87    0.59
  -5  22   1    1.39    1.21
  -5  22   1    3.07    0.54
  -4 -22   1    1.61    0.58
  -4 -22   1    1.54    0.26
   4 -22  -1    1.85    0.74
   4 -22  -1    1.67    0.41
  -4 -22   1    0.84    0.44
  -4  22   1    1.58    0.38
  -4  22   1    2.37    1.01
  -4  22   1    1.53    0.40
  -4  22   1    1.21    0.26
  -3 -22   1    0.37    0.16
  -3 -22   1    0.17    0.37
  -3 -22   1    0.13    0.35
   3 -22  -1    0.35    0.31
   3 -22  -1   -0.01    0.56
   3  22  -1    0.50    0.27
  -3  22   1    0.28    0.26
  -3  22   1    0.64    0.19
  -3  22   1    0.42    0.71
   2 -22  -1   16.72    1.82
  -2 -22   1   17.65    1.88
  -2 -22   1   17.37    1.74
  -2 -22   1   18.03    1.45
  -2  22   1   15.76    1.79
   2  22  -1   17.48    1.80
  -2  22   1   17.41    2.28
   1 -22  -1    4.63    0.76
  -1 -22   1    2.97    0.56
   1 -22  -1    3.70    0.58
  -1 -22   1    3.05    0.66
   1  22  -1    3.14    0.52
   1  22  -1    3.70    0.64
  -1  22   1    2.46    0.78
   0 -22   1    7.45    0.92
   0 -22   1    7.17    1.02
   0 -22  -1    6.04    1.02
   0 -22  -1    7.49    0.97
   0  22   1    7.51    1.23
   0  22   1    6.93    1.07
   0  22  -1    9.12    1.13
   0  22  -1    8.76    1.22
   0  22   1    9.15    1.01
   0  22  -1    7.35    0.97
  -1 -22  -1    8.94    1.05
  -1 -22  -1    8.30    1.14
   1 -22   1    9.11    0.97
   1 -22   1    5.46    0.96
   1  22   1    7.59    0.95
   1  22   1    7.28    1.03
  -1  22  -1    9.15    1.31
  -1  22  -1    9.43    1.12
  -1  22  -1    7.38    1.22
   1  22   1    7.24    1.21
   2 -22   1    0.63    0.42
  -2 -22  -1    0.78    0.37
   2 -22   1    0.91    0.30
   2 -22   1    0.12    0.67
  -2 -22  -1    0.86    0.18
  -2 -22  -1    1.42    0.38
  -2  22  -1    0.35    0.53
   2  22   1    1.17    0.56
  -3 -22  -1   19.91    1.65
  -3 -22  -1   17.77    1.84
   3 -22   1   15.32    2.45
  -3 -22  -1   15.06    1.95
  -3 -22  -1   17.40    1.84
  -3  22  -1   17.83    1.87
  -3  22  -1   16.80    2.33
  -3  22  -1   18.11    1.53
  -4 -22  -1   21.24    2.03
  -4 -22  -1   19.83    2.20
  -4 -22  -1   17.75    1.98
   4 -22   1   19.54    2.58
  -4 -22  -1   20.74    1.78
  -4  22  -1   19.02    2.03
  -4  22  -1   20.71    2.67
  -4  22  -1   17.10    1.63
  -5 -22  -1    0.51    0.61
  -5 -22  -1    0.41    0.22
  -5 -22  -1    0.80    0.51
   5 -22   1    1.48    0.75
  -5 -22  -1    0.16    0.29
  -5  22  -1    0.27    0.32
  -5  22  -1    0.62    0.34
  -5  22  -1   -0.34    0.97
  -6 -22  -1    0.25    0.24
  -6 -22  -1    0.22    0.21
  -6 -22  -1    0.22    0.14
  -6 -22  -1   -0.09    0.28
  -6  22  -1    0.12    0.31
  -6  22  -1    0.15    0.33
  -6  22  -1    0.14    0.35
  -6  22  -1    0.18    0.42
  -7 -22  -1    0.41    0.25
  -7 -22  -1    0.41    0.14
  -7 -22  -1    0.39    0.23
  -7  22  -1    0.18    0.44
  -7  22  -1    0.49    0.21
  -7  22  -1    0.69    0.36
  -7  22  -1    0.19    0.34
  -8 -22  -1    0.34    0.22
  -8 -22  -1    0.18    0.23
  -8  22  -1   -0.32    0.46
  -8  22  -1    0.57    0.33
  -8  22  -1    0.33    0.34
  -8  22  -1    0.63    0.23
  -8 -23   1    0.62    0.24
  -8 -23   1    0.36    0.21
  -8  23   1   -0.20    0.47
  -8  23   1   -0.59    0.39
  -8  23   1    0.10    0.21
  -8  23   1   -0.13    0.36
  -7 -23   1    0.38    0.15
  -7 -23   1    0.47    0.25
  -7 -23   1    0.95    0.26
  -7  23   1    0.55    0.45
  -7  23   1    0.72    0.38
  -7  23   1    0.29    0.21
  -7  23   1   -0.09    0.38
  -7  23   1    0.36    0.42
  -6 -23   1    2.58    0.36
  -6 -23   1    1.41    0.61
  -6 -23   1    1.43    0.32
  -6 -23   1    1.89    0.46
  -6 -23   1    1.79    0.27
  -6  23   1    2.20    0.48
   6  23  -1    1.76    0.49
  -6  23   1    1.90    0.52
  -6  23   1    1.31    0.49
  -5 -23   1    3.59    0.73
  -5 -23   1    3.09    0.41
  -5 -23   1    3.34    0.38
  -5  23   1    2.21    0.50
  -5  23   1    2.29    0.57
   5  23  -1    3.25    0.61
  -4 -23   1    0.28    0.41
   4 -23  -1   -0.40    0.58
  -4 -23   1    1.10    0.52
  -4 -23   1    0.80    0.20
   4  23  -1    1.18    0.39
  -4  23   1    0.43    0.32
  -4  23   1    2.15    1.06
  -4  23   1    0.31    0.22
  -4  23   1    0.97    0.37
  -3 -23   1    2.89    0.63
   3 -23  -1    2.94    0.52
  -3 -23   1    3.19    0.36
  -3 -23   1    1.89    0.52
   3  23  -1    2.52    0.50
  -3  23   1    2.47    0.46
  -3  23   1    2.73    0.35
  -3  23   1    2.74    0.97
  -2 -23   1    1.54    0.22
   2 -23  -1    2.19    0.45
  -2 -23   1    1.57    0.42
  -2 -23   1    1.72    0.50
  -2  23   1    1.10    0.72
  -2  23   1    1.93    0.26
  -2  23   1    2.03    0.36
   2  23  -1    1.12    0.36
  -1 -23   1    6.76    0.65
  -1 -23   1    6.73    0.90
   1 -23  -1    6.11    0.88
   1  23  -1    6.64    0.88
  -1  23   1    7.15    1.24
   0 -23  -1   28.72    2.77
   0 -23   1   28.59    2.74
   0  23  -1   24.61    3.08
   0  23   1   25.84    3.16
   0  23  -1   23.84    2.71
   0  23   1   28.36    2.78
   0  23  -1   26.87    2.76
  -1 -23  -1    0.99    0.19
   1 -23   1    0.84    0.32
  -1 -23  -1    0.47    0.35
  -1  23  -1    0.60    0.51
   1  23   1    0.40    0.29
  -1  23  -1    0.84    0.40
   1  23   1    0.68    0.54
   2 -23   1    3.65    1.06
  -2 -23  -1    4.41    0.69
  -2 -23  -1    4.38    0.42
  -2 -23  -1    3.90    0.69
   2 -23   1    3.62    0.62
  -2 -23  -1    4.56    0.47
  -2  23  -1    3.67    0.54
  -2  23  -1    4.68    0.45
  -2  23  -1    4.69    0.97
  -3 -23  -1    2.83    0.66
  -3 -23  -1    3.16    0.37
   3 -23   1    1.98    0.44
   3 -23   1    1.43    0.82
  -3 -23  -1    2.36    0.44
  -3 -23  -1    2.71    0.58
  -3  23  -1    3.00    0.46
  -3  23  -1    2.98    0.94
  -3  23  -1    2.79    0.35
  -4 -23  -1    1.99    0.57
  -4 -23  -1    1.19    0.60
  -4 -23  -1    2.23    0.33
   4 -23   1    1.81    0.86
  -4 -23  -1    2.06    0.44
  -4  23  -1    2.44    0.43
  -4  23  -1    2.26    0.99
  -4  23  -1    2.83    0.33
  -5 -23  -1    1.07    0.21
  -5 -23  -1    1.33    0.63
  -5 -23  -1    0.65    0.33
  -5 -23  -1    0.73    0.23
  -5  23  -1    0.99    0.39
  -6 -23  -1   14.31    1.70
  -6 -23  -1   14.94    1.51
  -6 -23  -1   16.04    1.45
  -6 -23  -1   17.98    1.48
  -6  23  -1   16.58    1.77
  -6  23  -1   15.81    1.66
  -7 -23  -1   -0.14    0.21
  -7 -23  -1    0.11    0.23
  -7 -23  -1    0.07    0.12
  -7  23  -1    0.30    0.33
  -7  23  -1    0.45    0.46
  -7  23  -1    0.07    0.19
  -7  23  -1    0.17    0.32
   8 -23   1    1.02    0.32
  -8 -23  -1    1.37    0.30
  -8 -23  -1    1.47    0.30
  -8  23  -1    1.90    0.30
  -8  23  -1    1.21    0.39
  -8  23  -1    1.04    0.55
  -8  23  -1    1.56    0.42
  -8 -24   1    1.64    0.30
  -8 -24   1    1.74    0.31
  -8  24   1    2.80    0.59
  -8  24   1    1.73    0.49
  -8  24   1    2.22    0.32
  -8  24   1    1.74    0.48
  -7 -24   1    1.37    0.21
  -7 -24   1    1.87    0.31
  -7 -24   1    1.43    0.31
  -7  24   1    1.07    0.46
  -7  24   1    1.27    0.27
  -7  24   1    1.04    0.44
  -6 -24   1    2.10    0.34
  -6 -24   1    0.98    0.55
  -6 -24   1    1.90    0.33
  -6 -24   1    2.27    0.45
  -6 -24   1    1.69    0.27
   6  24  -1    1.77    0.50
  -6  24   1    1.56    0.45
  -6  24   1    2.32    0.58
  -6  24   1    2.35    0.56
  -5 -24   1    1.70    0.30
  -5 -24   1    1.23    0.24
  -5 -24   1    1.34    0.28
  -5 -24   1    0.63    0.50
  -5 -24   1    1.40    0.42
  -5  24   1    1.51    0.45
  -5  24   1    1.34    0.46
  -5  24   1    1.22    0.41
   5  24  -1    1.60    0.48
  -4 -24   1   63.25    5.24
  -4 -24   1   55.99    5.82
   4 -24  -1   51.98    6.69
  -4 -24   1   57.24    5.49
  -4  24   1   56.80    4.83
  -4  24   1   54.31    5.91
   4  24  -1   68.18    5.77
  -3 -24   1   -0.06    0.41
  -3 -24   1    0.15    0.39
  -3 -24   1    0.35    0.17
   3 -24  -1    1.07    0.38
   3  24  -1    0.78    0.37
  -3  24   1   -0.04    0.74
  -3  24   1    0.31    0.29
  -3  24   1    0.50    0.20
  -2 -24   1    3.57    0.34
   2 -24  -1    3.28    0.60
  -2 -24   1    3.32    0.60
  -2 -24   1    2.95    0.63
  -2  24   1    4.07    0.52
   2  24  -1    2.80    0.54
  -2  24   1    3.08    0.37
  -2  24   1    2.47    0.89
  -1 -24   1    1.66    0.44
  -1 -24   1    1.52    0.26
   1 -24  -1    1.11    0.40
  -1  24   1    1.89    0.34
   1  24  -1    1.33    0.38
  -1  24   1    1.99    0.76
   0 -24  -1    1.04    0.39
   0 -24   1    0.63    0.35
   0 -24   1    1.09    0.22
   0 -24  -1    0.79    0.20
   0  24  -1    1.17    0.41
   0  24   1    0.52    0.58
   0  24  -1    0.82    0.55
   0  24   1    0.70    0.25
   0  24   1    0.39    0.42
  -1 -24  -1    0.05    0.16
  -1 -24  -1    0.00    0.32
   1 -24   1    0.58    0.30
  -1  24  -1    0.47    0.19
   1  24   1    0.09    0.30
   1  24   1   -0.29    0.51
  -1  24  -1    0.59    0.52
  -1  24  -1    0.18    0.40
   1  24   1    0.26    0.21
  -2 -24  -1    2.01    0.25
  -2 -24  -1    0.97    0.47
  -2 -24  -1    2.25    0.53
  -2 -24  -1    2.69    0.31
   2 -24   1    2.39    0.47
  -2  24  -1    1.88    0.72
   2  24   1    2.35    0.49
  -2  24  -1    1.78    0.35
  -2  24  -1    2.27    0.29
   3 -24   1    5.88    0.80
  -3 -24  -1    7.60    1.07
  -3 -24  -1    6.91    0.69
  -3 -24  -1    6.07    0.93
   3 -24   1    5.79    1.32
  -3  24  -1    6.29    0.80
  -3  24  -1    7.06    0.66
  -3  24  -1    6.82    1.31
  -4 -24  -1    3.07    0.72
  -4 -24  -1    2.72    0.65
   4 -24   1    0.70    0.73
  -4 -24  -1    2.35    0.35
   4 -24   1    2.13    0.42
  -4  24  -1    2.17    1.06
  -4  24  -1    2.51    0.33
  -4  24  -1    2.87    0.49
  -5 -24  -1    1.82    0.28
  -5 -24  -1    2.13    0.34
  -5 -24  -1    2.06    0.49
  -5 -24  -1    1.77    0.31
  -5 -24  -1    0.44    0.58
  -5  24  -1    1.32    0.43
  -5  24  -1    1.91    0.48
  -6 -24  -1    0.36    0.24
  -6 -24  -1    0.62    0.27
  -6 -24  -1    0.22    0.15
  -6  24  -1   -0.07    0.33
  -6  24  -1    0.54    0.36
  -7 -24  -1    1.80    0.34
   7 -24   1    2.05    0.40
  -7 -24  -1    2.66    0.37
  -7 -24  -1    2.11    0.26
  -7  24  -1    1.74    0.57
  -7  24  -1    1.84    0.32
  -7  24  -1    1.61    0.44
  -7  24  -1    1.81    0.43
  -8 -24  -1   -0.07    0.21
  -8 -24  -1    0.01    0.20
   8 -24   1   -0.08    0.23
  -8  24  -1    0.09    0.33
  -8  24  -1    0.25    0.21
  -8  24  -1   -0.12    0.28
  -8  24  -1   -0.69    0.47
   8 -25  -1   -0.19    0.21
  -8 -25   1    0.14    0.22
  -8 -25   1    0.12    0.19
  -8  25   1   -0.79    0.31
  -8  25   1    0.24    0.20
  -8  25   1   -0.73    0.35
  -8  25   1   -0.72    0.43
  -7 -25   1    5.42    0.59
  -7 -25   1    5.25    0.67
  -7 -25   1    5.12    0.50
  -7 -25   1    5.15    0.57
  -7  25   1    4.78    0.76
  -7  25   1    3.75    0.71
  -7  25   1    4.49    0.56
  -6 -25   1   25.77    2.51
  -6 -25   1   29.17    2.60
  -6 -25   1   26.22    2.94
  -6 -25   1   28.96    2.70
  -6 -25   1   30.52    2.51
   6  25  -1   31.69    2.94
  -6  25   1   26.56    2.81
  -6  25   1   28.58    3.01
  -5 -25   1   20.81    1.82
  -5 -25   1   21.41    1.88
  -5 -25   1   20.61    1.82
  -5 -25   1   18.83    1.97
  -5 -25   1   21.14    2.21
  -5  25   1   18.12    2.20
   5  25  -1   20.56    2.15
  -5  25   1   18.55    2.07
  -4 -25   1   11.93    1.13
  -4 -25   1   11.77    1.49
  -4  25   1   11.27    1.07
   4  25  -1   12.32    1.37
  -4  25   1   10.96    1.37
  -3 -25   1   40.56    4.21
   3 -25  -1   44.07    4.42
  -3 -25   1   43.62    4.01
  -3 -25   1   44.39    4.51
   3  25  -1   50.23    4.45
  -3  25   1   45.85    3.70
  -3  25   1   44.23    4.53
  -2 -25   1   35.16    2.79
  -2 -25   1   32.01    3.47
   2 -25  -1   37.76    3.45
  -2  25   1   33.47    2.83
  -2  25   1   31.01    4.05
   2  25  -1   36.21    3.44
  -2  25   1   31.64    3.46
   1 -25  -1   13.82    1.17
  -1 -25   1   13.79    1.51
  -1 -25   1   14.44    1.17
   1 -25  -1   13.19    1.49
  -1  25   1   10.50    1.85
  -1  25   1   12.16    1.41
   1  25  -1   12.97    1.50
   0 -25  -1    2.75    0.55
   0 -25   1    1.77    0.30
   0 -25   1    1.26    0.45
   0 -25  -1    2.41    0.31
   0  25   1    3.52    0.42
   0  25  -1    1.64    0.52
   0  25   1    2.76    0.84
  -1 -25  -1    1.77    0.52
   1 -25   1    2.06    0.46
   1 -25   1    2.15    0.30
   1  25   1    2.80    0.54
   1  25   1    1.80    0.74
  -1  25  -1    1.23    0.69
   1  25   1    2.26    0.38
  -1  25  -1    1.96    0.34
  -2 -25  -1    2.85    0.62
  -2 -25  -1    2.59    0.30
   2 -25   1    3.63    0.56
  -2  25  -1    3.20    0.45
   2  25   1    3.17    0.59
  -2  25  -1    2.65    0.83
  -2  25  -1    2.90    0.35
   3 -25   1   39.72    4.26
  -3 -25  -1   42.96    4.44
   3 -25   1   36.04    5.16
  -3 -25  -1   46.79    3.95
  -3  25  -1   42.56    4.43
  -3  25  -1   45.57    3.64
   3  25   1   50.91    4.40
  -4 -25  -1    1.26    0.26
   4 -25   1    1.04    0.34
  -4 -25  -1    1.38    0.57
  -4  25  -1    1.08    0.34
  -4  25  -1    1.18    0.24
  -5 -25  -1   30.05    2.96
  -5 -25  -1   27.00    3.22
  -5 -25  -1   34.89    2.76
   5 -25   1   24.97    3.03
  -5 -25  -1   31.75    2.83
  -5 -25  -1   32.88    2.73
  -5  25  -1   31.57    3.23
  -5  25  -1   32.53    3.02
   6 -25   1    3.14    0.52
  -6 -25  -1    5.29    0.52
  -6 -25  -1    3.33    0.46
  -6 -25  -1    3.34    0.41
  -6  25  -1    2.73    0.56
  -6  25  -1    3.83    0.60
   7 -25   1    0.19    0.28
  -7 -25  -1   -0.17    0.22
  -7 -25  -1    0.08    0.22
  -7 -25  -1    0.37    0.14
  -7  25  -1    0.07    0.20
  -7  25  -1    0.18    0.32
  -7  25  -1    0.06    0.31
  -7  25  -1   -0.01    0.50
   8 -25   1   -0.11    0.20
  -8 -25  -1   -0.07    0.22
  -8  25  -1    0.24    0.32
  -8  25  -1    0.12    0.20
  -8  25  -1   -0.91    0.47
  -8  25  -1    0.15    0.29
  -7 -26   1    0.20    0.13
  -7 -26   1    0.08    0.29
   7 -26  -1    0.42    0.25
  -7 -26   1    0.12    0.22
  -7 -26   1    0.16    0.24
  -7  26   1    0.24    0.39
  -7  26   1   -0.67    0.32
  -7  26   1    0.07    0.19
  -6 -26   1   -0.06    0.14
  -6 -26   1    0.42    0.24
  -6 -26   1    0.56    0.24
  -6 -26   1   -0.38    0.28
  -6  26   1   -0.36    0.39
   6  26  -1    0.19    0.41
  -6  26   1   -0.67    0.38
  -5 -26   1    1.12    0.50
  -5 -26   1    0.84    0.22
  -5 -26   1    0.95    0.25
  -5 -26   1    1.10    0.27
  -5 -26   1    1.44    0.38
   5  26  -1    0.73    0.45
  -5  26   1    0.45    0.39
  -5  26   1    0.48    0.44
  -4 -26   1   11.32    1.26
  -4 -26   1   11.45    1.14
  -4 -26   1   10.43    1.45
  -4 -26   1   14.09    1.14
  -4 -26   1   12.04    1.11
  -4  26   1   10.48    1.09
  -4  26   1   12.51    1.33
  -4  26   1   11.75    1.39
   4  26  -1   11.70    1.39
  -3 -26   1    7.39    1.08
   3 -26  -1    7.91    1.03
  -3 -26   1    8.16    0.82
  -3 -26   1    8.30    1.16
   3  26  -1   10.41    1.13
  -3  26   1    8.86    1.69
  -3  26   1    7.45    1.01
  -3  26   1    8.45    0.79
  -2 -26   1   71.89    6.97
   2 -26  -1   74.77    6.93
   2  26  -1   81.74    6.95
  -2  26   1   67.38    7.90
  -2  26   1   66.39    7.07
  -2  26   1   65.85    5.81
  -1 -26   1    2.07    0.31
   1 -26  -1    2.28    0.32
  -1 -26   1    2.25    0.57
   1 -26  -1    2.48    0.53
   1  26  -1    3.37    0.62
  -1  26   1    1.83    0.85
  -1  26   1    2.55    0.42
   0 -26  -1    3.90    0.42
   0 -26  -1    4.40    0.70
   0 -26   1    4.92    0.71
   0  26  -1    4.17    0.73
   0  26   1    2.58    0.48
   0  26   1    2.62    0.88
   1 -26   1   14.32    1.50
   1 -26   1   15.40    1.19
  -1 -26  -1   13.28    1.55
  -1  26  -1   12.27    1.87
   1  26   1   13.91    1.56
  -1  26  -1   11.56    1.40
   1  26   1   12.90    1.42
   1  26   1   13.15    1.94
   2 -26   1   45.05    3.70
  -2 -26  -1   33.78    3.73
  -2  26  -1   32.24    3.70
   2  26   1   43.59    3.73
  -2  26  -1   34.94    3.05
  -2  26  -1   34.10    4.25
   3 -26   1    0.82    0.34
  -3 -26  -1    0.29    0.49
  -3 -26  -1    1.22    0.25
  -3 -26  -1    0.74    0.46
   3  26   1    2.12    0.52
  -3  26  -1    0.54    0.83
  -3  26  -1    1.35    0.27
  -3  26  -1    1.73    0.36
  -4 -26  -1   11.13    0.94
  -4 -26  -1    9.13    1.09
  -4 -26  -1    9.01    0.92
  -4 -26  -1   11.00    1.37
  -4 -26  -1    9.82    0.96
   4 -26   1    8.05    1.07
  -4  26  -1   10.18    1.09
  -4  26  -1    9.10    1.13
   4  26   1   10.69    1.20
  -4  26  -1    8.91    0.87
  -5 -26  -1    0.52    0.19
  -5 -26  -1    0.21    0.22
  -5 -26  -1    0.81    0.38
  -5 -26  -1   -1.02    0.43
   5 -26   1    0.46    0.29
  -5 -26  -1    0.69    0.26
  -5  26  -1    0.25    0.33
   5  26   1    0.61    0.41
  -5  26  -1    0.57    0.37
  -6 -26  -1    4.81    0.55
   6 -26   1    3.12    0.58
  -6 -26  -1    4.51    0.50
  -6 -26  -1    4.27    0.53
  -6  26  -1    6.61    0.75
   6  26   1    4.42    0.75
  -6  26  -1    6.01    0.73
  -7 -26  -1    0.35    0.23
  -7 -26  -1   -0.16    0.12
   7 -26   1   -0.33    0.23
  -7 -26  -1   -0.07    0.23
  -7  26  -1    0.49    0.35
  -7  26  -1   -0.05    0.30
  -7  26  -1    0.21    0.20
  -7 -27   1    1.26    0.34
  -7 -27   1    0.98    0.27
   7 -27  -1    0.66    0.25
  -7 -27   1    1.28    0.29
  -7 -27   1    1.25    0.18
  -7  27   1    0.74    0.45
  -7  27   1    1.41    0.29
  -7  27   1    0.68    0.42
  -6 -27   1   -0.16    0.28
  -6 -27   1    0.13    0.23
   6 -27  -1    0.54    0.24
  -6 -27   1    0.27    0.25
  -6 -27   1   -0.04    0.16
  -6  27   1    0.09    0.39
  -6  27   1   -0.25    0.40
  -5 -27   1    1.33    0.29
  -5 -27   1    0.85    0.36
  -5 -27   1    1.57    0.30
  -5 -27   1    1.39    0.26
  -5 -27   1    1.08    0.49
   5 -27  -1    1.26    0.31
   5  27  -1    1.37    0.49
  -5  27   1    0.63    0.45
  -5  27   1    1.17    0.47
  -4 -27   1    4.06    0.45
  -4 -27   1    4.03    0.46
  -4 -27   1    3.99    0.45
  -4 -27   1    3.31    0.56
  -4 -27   1    3.29    0.69
  -4  27   1    3.69    0.61
  -4  27   1    2.83    0.46
  -4  27   1    2.71    0.58
   4  27  -1    3.70    0.67
  -3 -27   1    2.44    0.35
  -3 -27   1    2.51    0.63
   3 -27  -1    3.18    0.55
   3  27  -1    2.82    0.58
  -3  27   1    2.67    0.37
  -3  27   1    2.51    0.49
   2 -27  -1    6.49    0.90
  -2 -27   1    6.06    0.94
  -2  27   1    6.49    0.66
   2  27  -1    8.06    1.01
  -2  27   1    6.22    0.82
  -2  27   1    6.18    1.39
  -1 -27   1   37.18    3.34
  -1 -27   1   43.66    4.09
   1 -27  -1   42.19    4.06
   1 -27  -1   43.96    3.36
   1  27  -1   44.87    4.10
  -1  27   1   35.49    4.66
  -1  27   1   37.27    4.08
   0 -27  -1    8.46    0.77
   0 -27  -1    7.35    1.04
   0 -27   1    7.05    1.03
   0 -27   1    9.30    0.80
   0  27   1    6.25    1.32
   0  27   1    7.60    0.93
   0  27  -1    9.67    1.21
  -1 -27  -1   26.29    2.75
   1 -27   1   27.47    2.71
   1 -27   1   27.23    2.22
  -1 -27  -1   24.82    2.20
   1  27   1   31.95    2.81
  -1  27  -1   23.82    2.67
  -2 -27  -1   10.95    1.49
   2 -27   1   14.11    1.41
   2  27   1   15.60    1.49
  -2  27  -1   10.86    1.32
  -2  27  -1   11.71    1.09
  -2  27  -1   11.96    1.88
  -3 -27  -1    2.95    0.39
   3  27   1    3.10    0.64
  -3  27  -1    2.90    0.40
  -3  27  -1    3.45    0.52
  -4 -27  -1    0.83    0.22
  -4 -27  -1    0.09    0.47
   4 -27   1    0.71    0.29
  -4 -27  -1    1.10    0.24
  -4 -27  -1    0.48    0.35
  -4 -27  -1    0.83    0.25
  -4  27  -1    0.49    0.33
   4  27   1   -0.02    0.38
  -4  27  -1    0.89    0.37
  -4  27  -1    0.50    0.20
  -5 -27  -1    0.82    0.27
  -5 -27  -1    0.67    0.22
  -5 -27  -1   -0.42    0.46
  -5 -27  -1    1.26    0.40
   5 -27   1    1.23    0.33
  -5 -27  -1    0.95    0.27
  -5  27  -1    0.64    0.39
  -5  27  -1    1.15    0.39
   5  27   1    0.40    0.37
  -6 -27  -1   11.63    1.20
  -6 -27  -1   14.04    1.23
   6 -27   1   12.13    1.35
  -6 -27  -1   13.37    1.26
  -6  27  -1   13.69    1.39
  -6  27  -1   13.97    1.47
   7 -27   1    0.15    0.24
  -7 -27  -1   -0.38    0.22
  -7 -27  -1   -0.07    0.12
  -7 -27  -1   -0.09    0.21
  -7  27  -1   -0.36    0.31
  -7  27  -1    0.13    0.20
  -7  27  -1    0.08    0.30
  -7 -28   1    0.02    0.19
  -7 -28   1    0.13    0.24
  -7 -28   1    0.14    0.23
  -7 -28   1    0.38    0.13
   7 -28  -1    0.37    0.20
  -7  28   1   -0.79    0.37
  -7  28   1    0.18    0.35
  -7  28   1    0.37    0.21
  -6 -28   1   -0.08    0.26
  -6 -28   1    0.10    0.16
  -6 -28   1    0.06    0.24
  -6 -28   1   -0.04    0.21
   6 -28  -1    0.43    0.21
  -6  28   1   -0.38    0.39
  -6  28   1   -0.11    0.39
  -5 -28   1   -0.39    0.21
  -5 -28   1   -0.18    0.37
   5 -28  -1    0.51    0.22
  -5 -28   1    0.11    0.20
  -5 -28   1   -0.19    0.17
  -5 -28   1    0.12    0.29
  -5  28   1   -0.32    0.41
   5  28  -1    0.57    0.37
  -5  28   1    0.06    0.39
  -4 -28   1    8.90    1.16
  -4 -28   1    9.63    0.86
  -4 -28   1    8.78    0.86
  -4 -28   1    8.38    0.96
  -4 -28   1    8.77    0.84
  -4  28   1    8.48    1.02
  -4  28   1    6.24    1.03
   4  28  -1    9.90    1.16
  -4  28   1    7.67    0.83
  -3 -28   1    4.93    0.57
  -3 -28   1    5.55    0.60
   3 -28  -1    5.86    0.80
  -3 -28   1    5.38    0.57
   3 -28  -1    6.11    0.68
  -3 -28   1    5.36    0.85
  -3 -28   1    4.26    0.66
  -3  28   1    4.92    0.70
   3  28  -1    6.56    0.86
  -3  28   1    5.32    0.58
  -3  28   1    4.50    0.71
  -2 -28   1    0.81    0.48
   2 -28  -1    0.42    0.37
  -2  28   1    0.86    0.25
  -2  28   1    0.88    0.31
   2  28  -1    0.67    0.48
   1 -28  -1    8.05    1.09
   1 -28  -1    8.57    0.80
  -1 -28   1    7.77    0.78
  -1 -28   1    8.65    1.12
  -1  28   1    8.31    0.99
   1  28  -1   10.18    1.19
  -1  28   1    8.17    1.54
   0 -28  -1    2.54    0.37
   0 -28   1    3.36    0.40
   0 -28  -1    2.75    0.62
   0 -28   1    3.29    0.64
   0  28   1    2.76    0.46
   0  28   1    2.96    0.94
   0  28  -1    4.66    0.83
   1 -28   1    2.54    0.52
  -1 -28  -1    1.38    0.54
  -1 -28  -1    2.08    0.30
   1 -28   1    2.83    0.35
  -1  28  -1    1.99    0.37
   1  28   1    2.70    0.66
   2 -28   1    7.92    0.96
  -2 -28  -1    7.62    1.08
  -2  28  -1    6.13    0.83
  -2  28  -1    6.48    0.68
  -2  28  -1    7.58    1.41
   2  28   1    8.33    1.06
  -3 -28  -1   12.25    1.73
  -3 -28  -1   13.54    1.56
  -3 -28  -1   17.82    1.45
  -3 -28  -1   15.36    1.45
  -3 -28  -1   14.40    1.40
  -3  28  -1   16.60    1.38
  -3  28  -1   16.08    1.67
  -3  28  -1   15.87    1.57
   3  28   1   16.48    1.74
  -4 -28  -1    0.55    0.20
  -4 -28  -1    0.13    0.44
  -4 -28  -1    0.05    0.20
  -4 -28  -1    0.07    0.31
   4 -28   1    0.34    0.25
  -4 -28  -1    0.03    0.21
  -4  28  -1    0.82    0.36
  -4  28  -1   -0.03    0.18
  -4  28  -1    0.66    0.33
   4  28   1    0.15    0.41
  -5 -28  -1    0.07    0.31
  -5 -28  -1    0.48    0.24
   5 -28   1    0.39    0.26
  -5 -28  -1   -0.13    0.18
  -5 -28  -1    0.37    0.24
  -5 -28  -1   -0.41    0.41
  -5  28  -1    0.47    0.38
  -5  28  -1   -0.03    0.32
   5  28   1    0.19    0.37
  -6 -28  -1    4.19    0.50
  -6 -28  -1    4.37    0.48
   6 -28   1    3.71    0.53
  -6 -28  -1    4.45    0.52
  -6  28  -1    4.42    0.64
  -6  28  -1    4.05    0.61
  -7 -28  -1    0.70    0.15
  -7 -28  -1    0.63    0.23
   7 -28   1    0.36    0.24
  -7 -28  -1    0.42    0.25
  -7  28  -1    0.14    0.32
  -7  28  -1    0.12    0.29
  -7  28  -1    0.92    0.24
  -7  29   1    5.89    0.77
  -6 -29   1   -0.20    0.15
  -6 -29   1    0.10    0.25
  -6 -29   1    0.11    0.21
  -6 -29   1   -0.10    0.23
   6 -29  -1   -0.07    0.19
  -6  29   1   -0.56    0.39
  -6  29   1   -0.34    0.38
  -5 -29   1    8.78    0.86
  -5 -29   1    8.94    0.86
  -5 -29   1    8.37    0.95
  -5 -29   1    8.60    0.88
  -5  29   1    8.25    1.13
  -5  29   1    8.26    1.10
   5  29  -1    9.19    1.16
  -4 -29   1    1.36    0.37
  -4 -29   1    1.28    0.27
  -4 -29   1    0.57    0.46
  -4 -29   1    1.26    0.26
  -4 -29   1    0.77    0.24
   4  29  -1    1.29    0.46
  -4  29   1    1.02    0.42
  -4  29   1    1.30    0.31
  -4  29   1    1.43    0.43
  -3 -29   1    9.99    1.07
  -3 -29   1    9.48    0.95
   3 -29  -1    9.76    1.03
  -3 -29   1   10.77    0.98
  -3 -29   1    8.00    1.22
   3 -29  -1    9.38    1.17
  -3  29   1   10.50    0.95
  -3  29   1   10.21    1.12
  -3  29   1    9.52    1.17
   3  29  -1   11.06    1.26
  -2 -29   1    6.89    0.80
   2 -29  -1    5.07    0.84
  -2 -29   1    7.38    1.00
   2 -29  -1    7.63    0.76
  -2  29   1    7.10    0.85
  -2  29   1    5.56    0.78
  -2  29   1    5.03    0.63
   2  29  -1    7.87    1.00
   1 -29  -1    2.45    0.34
  -1 -29   1    2.47    0.59
   1 -29  -1    2.15    0.55
  -1 -29   1    2.23    0.30
  -1  29   1    2.36    0.43
   1  29  -1    1.70    0.60
   0 -29  -1   -0.20    0.37
   0 -29   1    0.48    0.40
   0 -29   1    0.28    0.21
   0  29  -1    1.02    0.57
   0  29   1    0.09    0.24
  -1 -29  -1    0.48    0.45
  -1 -29  -1    0.14    0.19
   1 -29   1    0.40    0.39
   1  29   1    0.94    0.57
   2 -29   1    9.21    1.07
  -2 -29  -1    7.93    1.14
  -2 -29  -1    8.10    0.97
  -2  29  -1    7.60    0.93
  -2  29  -1    7.50    0.77
   2  29   1   11.90    1.24
  -2  29  -1    7.04    0.88
  -3 -29  -1    8.25    0.83
  -3 -29  -1    6.76    0.92
  -3 -29  -1    6.50    1.08
  -3  29  -1    8.05    0.93
   3  29   1    9.39    1.13
  -3  29  -1    9.48    0.99
  -3  29  -1    8.53    0.81
  -4 -29  -1    4.43    0.66
  -4 -29  -1    4.44    0.81
  -4 -29  -1    5.83    0.59
  -4 -29  -1    5.78    0.59
  -4 -29  -1    3.75    0.54
   4 -29   1    3.53    0.60
   4  29   1    7.25    0.90
  -4  29  -1    7.51    0.76
  -4  29  -1    6.01    0.76
  -4  29  -1    5.89    0.54
  -5 -29  -1    6.59    0.71
  -5 -29  -1    7.55    0.70
  -5 -29  -1    6.16    0.77
  -5 -29  -1    5.63    0.68
   5 -29   1    5.80    0.76
  -5  29  -1    8.22    0.88
  -5  29  -1    7.35    0.91
  -6 -29  -1    0.70    0.20
  -6 -29  -1    0.57    0.25
  -6 -29  -1    0.87    0.25
   6 -29   1    0.72    0.26
  -6  29  -1    0.56    0.36
  -6  29  -1    0.87    0.34
  -6 -30   1   -0.32    0.22
  -6 -30   1   -0.05    0.15
  -6 -30   1   -0.37    0.24
  -6 -30   1   -0.17    0.20
  -6  30   1   -0.15    0.40
  -6  30   1   -0.38    0.35
  -5 -30   1    6.65    0.74
  -5 -30   1    5.79    0.64
  -5 -30   1    6.60    0.64
  -5 -30   1    5.58    0.64
  -5  30   1    4.55    0.83
  -5  30   1    5.98    0.86
  -4 -30   1    1.69    0.53
  -4 -30   1    1.72    0.32
  -4 -30   1    2.32    0.44
  -4 -30   1    2.70    0.36
  -4 -30   1    1.68    0.31
  -4  30   1    2.20    0.51
  -4  30   1    2.65    0.54
  -4  30   1    2.23    0.34
   4  30  -1    1.89    0.52
   3 -30  -1    5.43    0.66
  -3 -30   1    5.77    0.62
  -3 -30   1    5.13    0.59
   3 -30  -1    3.61    0.71
  -3 -30   1    5.02    0.85
  -3 -30   1    5.23    0.69
  -3  30   1    6.37    0.81
  -3  30   1    6.83    0.78
  -3  30   1    5.93    0.62
   3  30  -1    6.69    0.90
  -2 -30   1    8.96    0.88
   2 -30  -1    5.95    0.89
   2 -30  -1    6.08    0.66
   2 -30  -1    6.99    0.78
  -2 -30   1    6.36    0.99
  -2  30   1    7.20    0.68
  -2  30   1    6.26    0.80
   2  30  -1    7.79    1.04
  -2  30   1    5.37    0.82
  -1 -30   1   14.75    1.71
  -1 -30   1   17.08    1.54
   1 -30  -1   14.81    1.31
   1 -30  -1   15.96    1.51
   1 -30  -1   14.75    1.67
  -1 -30   1   14.82    1.28
  -1  30   1   14.19    1.62
   1  30  -1   19.02    1.83
  -1  30   1   12.66    1.50
   0 -30   1    1.58    0.31
   0 -30  -1    2.39    0.45
   0 -30   1    3.16    0.47
   0 -30   1    1.41    0.52
   0 -30  -1    2.54    0.58
   0  30   1    1.69    0.37
   0  30  -1    2.63    0.65
  -1 -30  -1    8.58    0.91
   1 -30   1    7.38    0.75
   1 -30   1    7.12    0.99
   1 -30   1    9.11    0.86
  -1 -30  -1    5.44    0.66
  -1 -30  -1    6.71    1.02
   1  30   1   11.25    1.23
  -2 -30  -1   11.68    1.32
   2 -30   1   13.29    1.45
  -2 -30  -1   12.34    1.52
  -2  30  -1   13.12    1.16
  -2  30  -1   12.43    1.39
   2  30   1   17.10    1.62
  -2  30  -1   11.96    1.29
  -3 -30  -1    7.86    1.17
  -3 -30  -1    8.42    1.00
   3  30   1   12.05    1.28
  -3  30  -1    9.29    0.88
  -3  30  -1    8.43    0.98
  -3  30  -1    8.74    1.05
  -4 -30  -1    6.72    0.73
  -4 -30  -1    6.10    0.81
  -4 -30  -1    6.62    0.97
  -4 -30  -1    5.80    0.70
  -4 -30  -1    6.80    0.73
   4  30   1    9.01    1.05
  -4  30  -1    7.60    0.67
  -4  30  -1    8.70    0.93
  -4  30  -1    7.20    0.87
  -5 -30  -1   -0.05    0.17
  -5 -30  -1   -0.31    0.20
  -5 -30  -1   -0.30    0.19
  -5 -30  -1   -0.01    0.27
   5 -30   1    0.24    0.22
  -5  30  -1    0.05    0.35
  -5  30  -1    0.23    0.32
  -6 -30  -1   -0.02    0.21
  -6 -30  -1   -0.18    0.15
   6 -30   1    0.28    0.22
  -6 -30  -1   -0.07    0.20
  -6  30  -1   -0.11    0.32
  -6  30  -1    0.09    0.30
  -6 -31   1    0.12    0.23
  -6 -31   1    0.07    0.18
  -6 -31   1    0.43    0.25
  -6 -31   1    0.26    0.17
  -6  31   1    0.14    0.36
  -6  31   1    0.09    0.40
  -5 -31   1    1.68    0.30
  -5 -31   1    1.59    0.36
  -5 -31   1    1.42    0.30
  -5 -31   1    2.09    0.30
  -5  31   1    1.55    0.53
  -5  31   1    1.53    0.51
  -4 -31   1    0.17    0.19
  -4 -31   1    0.28    0.21
  -4 -31   1    0.26    0.29
  -4 -31   1   -0.40    0.34
  -4 -31   1    0.05    0.19
  -4  31   1    0.26    0.23
  -4  31   1    0.27    0.38
  -4  31   1   -0.04    0.35
  -3 -31   1    0.17    0.40
   3 -31  -1    0.54    0.35
  -3 -31   1    0.40    0.29
   3 -31  -1    0.67    0.27
  -3  31   1   -0.14    0.26
  -3  31   1    0.34    0.34
  -3  31   1   -0.17    0.30
   3  31  -1   -0.01    0.42
  -2 -31   1    5.68    0.97
   2 -31  -1    7.96    0.99
   2 -31  -1    6.59    0.69
  -2 -31   1    6.77    0.85
   2 -31  -1    7.06    0.81
  -2  31   1    7.45    0.91
   2  31  -1    9.84    1.15
  -2  31   1    7.42    0.73
  -2  31   1    7.18    0.87
   1 -31  -1   11.78    1.10
  -1 -31   1   12.42    1.45
   1 -31  -1   13.27    1.28
  -1 -31   1   11.97    1.05
  -1 -31   1   13.50    1.30
   1 -31  -1   10.93    1.41
  -1  31   1   11.22    1.27
   1  31  -1   16.72    1.65
  -1  31   1   12.70    1.37
   0 -31  -1   11.47    1.02
   0 -31   1   10.62    1.34
   0 -31   1   11.62    1.02
   0 -31  -1   11.53    1.18
   0 -31   1   13.33    1.20
   0 -31  -1    7.84    1.29
   0  31   1   11.28    1.25
  -1 -31  -1    8.74    1.16
  -1 -31  -1    9.14    0.98
   1 -31   1    9.36    1.13
   1 -31   1    7.71    0.81
   1 -31   1    9.15    0.93
  -1 -31  -1    7.81    0.73
   2 -31   1    6.38    0.74
  -2 -31  -1    6.04    0.97
  -2 -31  -1    6.17    0.80
  -2  31  -1    6.18    0.75
   2  31   1    7.20    1.00
  -2  31  -1    6.10    0.78
  -2  31  -1    6.97    0.67
  -3 -31  -1    1.84    0.42
  -3 -31  -1    2.85    0.60
   3  31   1    2.76    0.60
  -3  31  -1    1.49    0.33
  -3  31  -1    2.06    0.42
  -3  31  -1    1.45    0.39
  -4 -31  -1    0.81    0.23
  -4 -31  -1    0.61    0.22
  -4 -31  -1    0.34    0.22
  -4 -31  -1    1.07    0.33
  -4  31  -1    0.68    0.34
  -4  31  -1    1.41    0.39
  -4  31  -1    0.53    0.20
  -5 -31  -1    0.02    0.19
  -5 -31  -1   -0.13    0.17
  -5 -31  -1   -0.13    0.20
   5 -31   1    0.18    0.20
  -5 -31  -1   -0.33    0.22
  -5  31  -1    0.12    0.30
  -5  31  -1    0.28    0.32
   6 -31   1    0.50    0.21
  -6 -31  -1    0.40    0.21
  -6 -31  -1    0.44    0.23
  -6 -31  -1    0.81    0.19
  -6 -31  -1    0.69    0.23
  -6  31  -1    1.12    0.34
  -6  31  -1    0.49    0.29
  -5 -32   1    3.24    0.42
  -5 -32   1    3.34    0.42
  -5 -32   1    3.02    0.41
  -5 -32   1    3.79    0.49
  -5  32   1    3.52    0.64
  -5  32   1    3.28    0.63
  -4 -32   1    8.48    0.88
  -4 -32   1    8.06    0.85
  -4 -32   1    8.15    0.87
  -4 -32   1    7.80    0.95
  -4  32   1   10.23    1.13
  -4  32   1   10.14    0.82
  -4  32   1   10.88    1.10
   3 -32  -1    4.65    0.60
  -3 -32   1    5.67    0.82
  -3 -32   1    5.32    0.68
   3  32  -1    6.05    0.89
  -3  32   1    4.27    0.72
  -3  32   1    5.12    0.60
  -3  32   1    5.19    0.70
   2 -32  -1   -0.07    0.31
  -2 -32   1    0.57    0.32
   2 -32  -1   -0.11    0.20
  -2 -32   1    0.00    0.39
   2 -32  -1   -0.01    0.26
   2  32  -1    0.78    0.53
  -2  32   1    0.54    0.31
  -2  32   1    0.87    0.33
  -2  32   1    0.53    0.26
   1 -32  -1    0.13    0.36
  -1 -32   1    0.39    0.11
  -1 -32   1    0.43    0.42
   1 -32  -1    0.34    0.29
  -1 -32   1    0.00    0.29
   1  32  -1    0.15    0.54
  -1  32   1    0.70    0.29
  -1  32   1    0.12    0.28
   0 -32   1    3.90    0.74
   0 -32  -1    4.88    0.51
   0 -32  -1    4.62    0.78
   0 -32   1    5.64    0.66
   0 -32  -1    5.62    0.68
   0 -32   1    5.08    0.52
  -1 -32  -1    4.63    0.93
  -1 -32  -1    8.14    0.63
   1 -32   1    7.42    1.00
   1 -32   1    7.79    0.84
  -1 -32  -1    6.54    0.84
   1 -32   1    6.99    0.73
  -2 -32  -1    0.83    0.46
   2 -32   1    0.39    0.23
  -2 -32  -1    0.19    0.30
   2 -32   1    0.65    0.27
   2  32   1    0.98    0.50
  -2  32  -1    0.81    0.28
  -2  32  -1    0.45    0.27
  -2  32  -1    0.41    0.25
  -3 -32  -1   10.45    1.16
  -3 -32  -1    8.87    1.29
  -3  32  -1   11.18    1.25
  -3  32  -1   12.08    1.02
   3  32   1   14.29    1.39
  -3  32  -1   10.46    1.17
  -4 -32  -1    0.09    0.19
  -4 -32  -1   -0.24    0.17
  -4 -32  -1   -0.10    0.25
  -4 -32  -1    0.08    0.19
  -4  32  -1   -0.13    0.29
  -4  32  -1   -0.57    0.17
  -4  32  -1    0.05    0.32
  -5 -32  -1    1.40    0.29
  -5 -32  -1    1.93    0.35
  -5 -32  -1    2.20    0.31
  -5 -32  -1    2.31    0.31
  -5  32  -1    1.74    0.42
  -5  32  -1    1.86    0.41
  -5 -33   1   -0.11    0.19
  -5 -33   1    0.09    0.24
  -5 -33   1    0.09    0.17
  -5 -33   1    0.21    0.17
  -5  33   1    0.56    0.39
  -5  33   1    0.27    0.41
  -4 -33   1    3.30    0.44
  -4 -33   1    2.96    0.50
  -4 -33   1    4.00    0.48
  -4  33   1    4.20    0.66
  -4  33   1    4.27    0.67
  -4  33   1    5.00    0.43
   3 -33  -1    0.48    0.25
  -3 -33   1    0.32    0.30
  -3  33   1   -0.22    0.28
  -3  33   1    0.01    0.33
  -3  33   1    0.86    0.37
  -2 -33   1    5.88    0.90
   2 -33  -1    3.94    0.79
  -2 -33   1    7.55    0.79
   2 -33  -1    6.41    0.72
  -2  33   1    6.54    0.67
  -2  33   1    6.52    0.82
  -2  33   1    6.00    0.76
   2  33  -1    9.82    1.12
   1 -33  -1   -0.44    0.26
  -1 -33   1    0.36    0.30
   1 -33  -1   -0.62    0.18
  -1 -33   1    0.03    0.38
   1 -33  -1    0.46    0.38
   1  33  -1   -0.16    0.47
  -1  33   1    0.17    0.27
  -1  33   1    0.30    0.30
   0 -33   1   11.60    1.15
   0 -33   1   10.40    1.30
   0 -33  -1    9.22    1.30
   0 -33   1   11.04    0.96
   0 -33  -1   11.23    0.96
   0 -33  -1   10.48    1.15
   1 -33   1    0.30    0.27
  -1 -33  -1    0.35    0.33
   1 -33   1    0.02    0.21
   1 -33   1    0.13    0.36
  -1 -33  -1    0.36    0.42
   2 -33   1    2.21    0.40
  -2 -33  -1    2.27    0.56
   2 -33   1    2.35    0.36
  -2 -33  -1    2.93    0.48
  -2  33  -1    2.59    0.44
  -2  33  -1    2.68    0.43
   2  33   1    3.34    0.66
  -2  33  -1    3.13    0.41
  -3 -33  -1   -0.13    0.27
  -3  33  -1    0.05    0.22
  -3  33  -1    0.73    0.30
  -3  33  -1    0.21    0.28
  -4 -33  -1    0.23    0.26
  -4 -33  -1    0.17    0.19
  -4 -33  -1   -0.06    0.18
  -4  33  -1    0.59    0.31
  -4  33  -1    0.08    0.31
  -4  33  -1    0.21    0.16
  -5 -33  -1    0.18    0.23
  -5 -33  -1    0.44    0.19
  -5 -33  -1    0.32    0.18
  -5 -33  -1    0.15    0.17
  -5  33  -1    0.17    0.31
  -5  33  -1    0.32    0.29
  -5 -34   1   -0.21    0.15
  -4 -34   1    1.69    0.30
  -4 -34   1    2.80    0.40
  -4 -34   1    1.91    0.31
  -4  34   1    1.91    0.48
  -4  34   1    2.21    0.48
   3 -34  -1    1.27    0.29
  -3 -34   1    0.99    0.34
  -3  34   1    0.97    0.32
  -3  34   1    2.05    0.43
  -3  34   1    1.72    0.41
   2 -34  -1    8.68    0.81
  -2 -34   1    9.46    0.97
   2 -34  -1    8.44    0.92
  -2  34   1    8.31    1.05
  -2  34   1    9.02    0.99
  -2  34   1    8.97    0.87
  -1 -34   1    0.38    0.30
   1 -34  -1    0.69    0.29
   1 -34  -1    0.14    0.19
  -1  34   1    0.60    0.29
  -1  34   1    0.46    0.29
   0 -34  -1    0.63    0.17
   0 -34  -1    0.56    0.41
   0 -34   1    0.48    0.40
   0 -34   1    0.52    0.17
   0 -34   1    0.50    0.29
   0 -34  -1   -0.13    0.29
   1 -34   1   -0.25    0.19
   1 -34   1   -0.03    0.25
  -1 -34  -1   -0.24    0.28
  -1 -34  -1    0.18    0.38
   2 -34   1    0.15    0.20
  -2 -34  -1   -0.37    0.27
   2 -34   1    0.46    0.25
  -2  34  -1    0.84    0.28
   3 -34   1    0.12    0.18
  -3 -34  -1   -0.22    0.26
  -3  34  -1    0.15    0.27
  -3  34  -1   -0.16    0.20
  -3  34  -1   -0.13    0.26
  -4 -34  -1    7.90    0.84
  -4 -34  -1    9.38    0.91
  -4  34  -1    8.27    1.00
  -4  34  -1    9.29    0.97
  -4 -35   1    0.47    0.27
  -4 -35   1    0.48    0.19
  -4 -35   1    0.73    0.21
  -4  35   1   -0.05    0.34
  -4  35   1    0.49    0.41
  -3 -35   1    0.42    0.29
   3 -35  -1    0.94    0.21
   3 -35  -1    0.84    0.26
  -3  35   1    1.23    0.38
  -3  35   1    0.92    0.27
  -3  35   1    1.61    0.43
   2 -35  -1    0.22    0.17
  -2 -35   1    0.13    0.28
   2 -35  -1    0.09    0.24
  -2  35   1    0.10    0.30
  -2  35   1   -0.53    0.23
  -2  35   1    0.40    0.30
   1 -35  -1    0.99    0.30
  -1 -35   1    0.30    0.30
   1 -35  -1    0.87    0.20
  -1  35   1    1.11    0.32
  -1  35   1    0.72    0.31
   0 -35   1    9.79    1.12
   0 -35   1   11.52    0.93
   0 -35  -1    9.45    1.12
   0 -35  -1   11.44    0.92
   1 -35   1    1.00    0.22
   1 -35   1    1.44    0.33
  -1 -35  -1    0.81    0.33
  -2 -35  -1    8.88    1.02
   2 -35   1    9.04    0.88
  -2  35  -1   12.31    0.95
  -3 -35  -1    0.50    0.28
   3 -35   1   -0.07    0.17
  -3  35  -1    0.57    0.31
  -3  35  -1    0.24    0.20
  -3  35  -1    0.81    0.29
  -4 -35  -1   -0.04    0.16
  -4 -35  -1    0.04    0.22
  -4  35  -1    0.32    0.26
  -4  35  -1    0.07    0.27
   3 -36  -1    1.84    0.26
  -3 -36   1    1.92    0.38
   3 -36  -1    2.03    0.32
  -3  36   1    2.25    0.44
  -3  36   1    2.63    0.47
  -3  36   1    2.42    0.32
  -2 -36   1   -0.06    0.28
   2 -36  -1    0.03    0.15
   2 -36  -1    0.05    0.22
  -2  36   1   -0.35    0.26
  -2  36   1    0.12    0.29
  -2  36   1   -0.24    0.25
   1 -36  -1    7.10    0.65
  -1 -36   1    6.80    0.80
   1 -36  -1    7.22    0.79
  -1  36   1    7.85    0.82
  -1  36   1    7.34    0.74
   0 -36   1   -0.15    0.25
   0 -36  -1   -0.03    0.26
   1 -36   1    3.90    0.55
  -1 -36  -1    4.53    0.60
   1 -36   1    4.63    0.45
  -1  36  -1    5.64    0.55
   2 -36   1    1.79    0.26
  -2 -36  -1    2.28    0.38
  -2  36  -1    1.85    0.31
  -3 -36  -1   -0.12    0.23
   3 -36   1    0.31    0.16
  -3  36  -1   -0.02    0.17
  -3  36  -1    0.38    0.29
   3 -37  -1    0.36    0.14
  -3 -37   1    0.01    0.24
   2 -37  -1    7.34    0.82
   2 -37  -1    7.63    0.71
  -2 -37   1    8.41    0.86
  -2  37   1    8.53    0.90
  -2  37   1    7.86    0.95
  -2  37   1   10.05    0.82
  -1 -37   1    0.05    0.26
   1 -37  -1    0.00    0.23
   1 -37  -1    0.32    0.12
  -1  37   1    0.02    0.24
   0 -37  -1    4.48    0.53
   0 -37   1    3.76    0.51
   1 -37   1    0.19    0.12
   1 -37   1    0.35    0.24
  -1 -37  -1    0.46    0.27
  -1  37  -1   -0.10    0.23
   2 -37   1   -0.01    0.14
  -2 -37  -1    0.14    0.25
  -2  37  -1    0.00    0.19
  -3  37  -1    0.86    0.29
   1 -38  -1    2.80    0.40
   1 -38  -1    3.17    0.29
  -1 -38   1    2.40    0.41
  -1  38   1    3.60    0.43
   0 -38  -1    1.54    0.31
   0 -38   1    1.48    0.30
  -1 -38  -1    0.25    0.24
   1 -38   1    0.53    0.10
   1 -38   1    0.10    0.20
  -1  38  -1    0.37    0.22
  -7   0   2    0.23    0.18
  -7   0   2    0.13    0.26
  -7   0   2    0.16    0.50
  -6   0   2   18.81    1.90
  -6   0   2   18.87    2.42
  -6   0   2   20.01    2.02
  -5   0   2    0.11    0.21
   5   0  -2   -0.22    0.47
  -5   0   2   -0.34    0.37
  -5   0   2   -0.01    0.13
  -5   0   2    0.15    0.35
  -4   0   2    5.84    1.01
  -4   0   2    6.55    0.75
  -4   0   2    6.48    1.11
   4   0  -2    7.87    0.98
  -3   0   2    0.12    0.14
   3   0  -2    0.04    0.32
  -3   0   2    0.29    0.31
  -3   0   2   -0.23    0.38
  -3   0   2   -0.02    0.22
   3   0  -2    0.11    0.09
  -2   0   2    0.90    0.40
   2   0  -2    0.65    0.10
  -2   0   2    0.57    0.16
   1   0  -2    0.54    0.11
  -1   0   2    0.20    0.15
   0   0  -2    2.13    0.37
   0   0  -2    2.32    0.34
   0   0   2    2.54    0.61
  -1   0  -2    0.10    0.29
  -1   0  -2    0.66    0.11
   1   0   2    0.34    0.17
   2   0   2   92.77    7.99
  -2   0  -2   69.83    7.69
  -2   0  -2   88.99    9.08
   3   0   2    0.33    0.16
  -3   0  -2    0.20    0.52
  -3   0  -2    0.00    0.38
   3   0   2   -0.11    0.24
  -4   0  -2   27.33    2.87
   4   0   2   30.94    2.85
  -4   0  -2   27.25    3.45
  -5   0  -2    0.05    0.26
  -5   0  -2    0.08    0.15
   5   0   2    0.11    0.21
  -5   0  -2    0.23    0.42
  -5   0  -2   -0.23    0.63
   5   0   2    0.18    0.23
  -6   0  -2   22.74    2.87
  -6   0  -2   21.43    2.06
   6   0   2   19.24    2.15
  -7   0  -2   -1.47    0.84
  -7   0  -2    0.22    0.32
  -7   0  -2    0.09    0.27
  -8   0  -2    3.58    0.63
  -8   1   2    3.51    0.49
  -7  -1   2   18.39    2.35
  -7  -1   2   17.36    1.76
  -7   1   2   16.82    2.34
  -7   1   2   18.36    1.83
  -7   1   2   17.87    1.77
  -6  -1   2    1.26    0.38
  -6  -1   2    1.36    0.28
  -6  -1   2    1.15    0.52
  -6   1   2    1.55    0.55
  -6   1   2    1.06    0.35
  -6   1   2    1.42    0.29
   5  -1  -2   12.07    1.47
  -5  -1   2    9.93    1.46
  -5  -1   2    9.30    1.24
  -5  -1   2   10.85    1.09
  -5  -1   2    9.70    1.01
   5   1  -2   11.00    1.41
  -5   1   2    9.16    1.01
  -5   1   2   10.39    1.28
  -5   1   2    8.70    1.41
  -5   1   2    9.62    1.08
   4  -1  -2   70.54    5.89
  -4  -1   2   61.77    5.69
  -4  -1   2   67.46    5.96
  -4  -1   2   54.09    6.93
  -4   1   2   67.07    5.96
   4   1  -2   65.76    5.88
  -4   1   2   56.78    6.94
  -4   1   2   54.62    6.79
  -3  -1   2    0.71    0.26
  -3  -1   2    0.45    0.18
  -3  -1   2    0.06    0.33
   3  -1  -2    0.69    0.36
   3  -1  -2    0.52    0.26
  -3   1   2    0.75    0.21
  -3   1   2   -0.05    0.45
  -3   1   2    0.96    0.41
   3   1  -2    0.69    0.14
  -2  -1   2    5.44    0.76
   2  -1  -2    5.33    0.54
  -2  -1   2    6.42    0.98
   2  -1  -2    4.59    0.70
  -2  -1   2    5.27    0.61
  -2   1   2    5.25    0.62
   2   1  -2    5.21    0.55
   1  -1  -2    0.24    0.09
  -1  -1   2    0.14    0.22
  -1  -1   2    0.24    0.13
   1  -1  -2    0.12    0.18
   1   1  -2    0.27    0.09
  -1   1   2    0.09    0.13
   0  -1  -2    9.91    0.82
   0  -1   2    7.58    1.00
   0  -1   2    7.57    0.77
   0   1  -2    7.86    0.80
   0   1   2    6.52    0.93
  -1  -1  -2   16.83    1.50
  -1  -1  -2   13.21    1.58
   1  -1   2   15.30    1.57
   1   1   2   17.45    1.61
  -1   1  -2   17.14    1.60
  -2  -1  -2   30.27    2.69
  -2  -1  -2   29.09    3.29
   2  -1   2   32.11    2.78
  -2  -1  -2   22.53    2.74
   2  -1   2   25.81    2.65
  -2   1  -2   27.88    2.82
   2   1   2   33.09    2.79
  -2   1  -2   25.39    3.23
  -3  -1  -2  103.43   11.05
   3  -1   2   84.12    9.34
  -3  -1  -2  113.71   11.19
   3  -1   2  116.64    9.74
  -3  -1  -2  111.12    9.39
  -3  -1  -2   84.23    9.36
  -3  -1  -2   99.88    9.22
  -3   1  -2   93.37   11.04
   3   1   2  115.37    9.74
  -4  -1  -2   76.51    7.77
   4  -1   2   92.72    8.05
  -4  -1  -2   79.90    9.20
  -4  -1  -2   93.37    9.25
   4   1   2   90.97    8.06
  -4   1  -2   80.20    9.23
  -4   1  -2   70.41    7.78
   5  -1   2   10.16    1.11
  -5  -1  -2   12.00    1.73
  -5  -1  -2    9.74    1.04
  -5  -1  -2   10.14    1.28
   5  -1   2   10.15    1.27
  -5  -1  -2    9.56    1.13
   5   1   2   10.26    1.12
  -5   1  -2   12.65    1.38
  -5   1  -2    9.57    1.03
  -5   1  -2   11.14    1.76
  -6  -1  -2    1.45    0.82
  -6  -1  -2    0.53    0.23
   6  -1   2    0.61    0.33
  -6   1  -2    2.33    0.99
  -6   1  -2    0.91    0.25
   6   1   2   -0.02    0.29
  -7  -1  -2    1.80    0.42
  -7  -1  -2    2.30    1.11
  -7  -1  -2    1.78    0.46
  -7   1  -2    1.85    0.47
  -7   1  -2    2.05    0.41
  -7   1  -2    1.41    1.10
  -8   1  -2    2.77    0.56
  -9   2   2    7.28    0.93
  -8   2   2    1.06    0.40
  -8   2   2    1.57    0.31
  -7  -2   2   46.58    4.89
  -7   2   2   44.08    4.90
  -7   2   2   38.31    3.98
  -7   2   2   41.28    4.02
  -6  -2   2   12.50    1.75
  -6  -2   2   13.02    1.46
  -6   2   2   11.14    1.31
  -6   2   2   11.32    1.22
  -6   2   2   12.22    1.66
  -5  -2   2  158.11   16.21
   5  -2  -2  179.33   15.54
  -5  -2   2  156.83   18.43
  -5  -2   2  175.58   15.95
  -5  -2   2  166.68   15.85
  -5   2   2  164.14   15.86
   5   2  -2  179.15   15.53
  -5   2   2  187.49   16.26
  -5   2   2  152.20   18.43
  -5   2   2  173.21   15.96
   4  -2  -2    0.31    0.40
  -4  -2   2    0.41    0.26
  -4  -2   2    0.17    0.32
  -4  -2   2    0.06    0.17
  -4   2   2    0.12    0.18
  -4   2   2    0.72    0.62
  -4   2   2    0.15    0.31
  -3  -2   2    3.84    0.47
  -3  -2   2    3.81    0.68
   3  -2  -2    4.18    0.65
  -3  -2   2    2.65    0.68
  -3  -2   2    3.83    0.50
  -3   2   2    3.41    0.78
  -3   2   2    4.25    0.73
   3   2  -2    4.12    0.42
  -3   2   2    4.18    0.40
  -3   2   2    4.00    0.48
  -2  -2   2   37.83    3.92
  -2  -2   2   33.97    4.71
   2  -2  -2   43.59    3.89
  -2  -2   2   45.35    3.95
  -2   2   2   42.09    3.96
  -2   2   2   40.86    4.64
   2   2  -2   43.08    3.73
   1  -2  -2    9.34    1.02
  -1  -2   2   10.42    0.98
  -1  -2   2    9.96    1.06
  -1   2   2    8.79    0.98
   1   2  -2   10.27    0.91
   0  -2   2  775.23   69.56
   0  -2  -2  785.46   66.69
   0  -2   2  663.04   66.67
   0   2  -2  663.72   66.00
   0   2   2  824.67   69.59
  -1  -2  -2    9.18    1.00
   1  -2   2    9.97    0.87
   1  -2   2    8.76    0.95
  -1  -2  -2    9.22    0.91
  -1   2  -2    9.67    1.02
   1   2   2    9.65    1.05
  -2  -2  -2   63.72    5.61
  -2  -2  -2   68.15    6.62
  -2  -2  -2   48.93    5.56
   2  -2   2   53.58    5.54
   2  -2   2   68.82    5.78
  -2   2  -2   62.89    5.65
   2   2   2   68.81    5.80
  -2   2  -2   52.81    6.52
  -3  -2  -2   10.87    1.43
  -3  -2  -2   15.36    1.58
  -3  -2  -2   14.44    1.31
  -3  -2  -2   14.75    1.43
   3  -2   2   10.65    1.38
  -3  -2  -2   13.85    1.82
   3  -2   2   15.17    1.60
  -3   2  -2   11.60    1.72
   3   2   2   15.17    1.39
  -3   2  -2   10.47    1.55
   4  -2   2   32.34    3.91
  -4  -2  -2   34.83    3.23
  -4  -2  -2   37.50    4.08
  -4  -2  -2   38.69    3.93
  -4  -2  -2   36.31    3.40
   4  -2   2   39.71    3.43
  -4   2  -2   27.12    4.01
   4   2   2   37.99    3.43
  -4   2  -2   28.39    3.42
  -5  -2  -2   29.87    2.87
   5  -2   2   28.45    2.83
  -5  -2  -2   27.85    2.76
  -5  -2  -2   32.74    2.88
  -5  -2  -2   28.84    3.44
   5  -2   2   28.28    3.24
   5   2   2   30.04    2.85
  -5   2  -2   27.96    3.57
  -5   2  -2   28.04    2.75
  -5   2  -2   24.86    2.83
  -6  -2  -2    1.71    0.34
  -6  -2  -2    1.75    0.83
   6  -2   2    2.10    0.46
   6   2   2    1.67    0.46
  -6   2  -2    1.38    0.31
  -6   2  -2    0.47    0.90
  -7  -2  -2   -0.20    0.84
  -7   2  -2    0.42    0.29
  -7   2  -2    0.67    1.14
  -7   2  -2    1.02    0.40
  -8   2  -2    6.58    0.94
  -8   2  -2    7.11    0.92
  -9   3   2    0.96    0.36
  -9   3   2    0.99    0.28
  -8   3   2    2.15    0.38
  -8   3   2    2.30    0.49
  -7   3   2   38.41    3.62
  -7   3   2   38.51    4.44
  -7   3   2   35.61    3.58
  -6  -3   2    0.50    0.43
  -6  -3   2    0.70    0.46
  -6   3   2    1.01    0.25
  -6   3   2    0.68    0.34
  -6   3   2    0.88    0.50
  -5  -3   2   40.87    3.67
  -5  -3   2   38.95    3.78
  -5  -3   2   35.48    4.46
   5  -3  -2   41.43    3.89
  -5  -3   2   40.96    3.93
  -5   3   2   38.36    4.57
  -5   3   2   38.69    3.80
  -5   3   2   38.30    3.92
   5   3  -2   49.29    3.96
  -5   3   2   35.38    4.47
  -5   3   2   36.52    3.71
  -4  -3   2   61.32    5.64
  -4  -3   2   59.69    5.38
   4  -3  -2   66.17    5.61
  -4  -3   2   63.96    5.62
  -4  -3   2   51.10    6.57
  -4   3   2   46.89    6.48
  -4   3   2   56.93    6.58
  -4   3   2   62.90    5.64
   4   3  -2   58.63    5.31
  -3  -3   2    1.26    0.27
  -3  -3   2    0.53    0.44
   3  -3  -2    1.06    0.42
  -3  -3   2    1.36    0.23
  -3  -3   2    1.07    0.45
  -3   3   2    0.57    0.54
  -3   3   2    1.42    0.40
  -3   3   2    1.14    0.24
   3   3  -2    1.43    0.20
  -2  -3   2   14.98    1.84
   2  -3  -2   18.91    1.81
  -2  -3   2   14.16    2.27
  -2  -3   2   19.53    1.73
  -2  -3   2   17.42    1.67
  -2   3   2   17.32    2.09
  -2   3   2   18.40    1.75
   2   3  -2   18.01    1.63
  -1  -3   2    3.26    0.50
  -1  -3   2    1.93    0.26
   1   3  -2    1.95    0.24
  -1   3   2    1.44    0.26
   0  -3   2    0.58    0.31
   0  -3   2    1.40    0.27
   0  -3  -2    0.43    0.25
   0  -3  -2    0.71    0.19
   0   3  -2    0.57    0.23
   0   3   2    0.44    0.35
  -1  -3  -2    4.41    0.65
   1  -3   2    5.47    0.59
  -1  -3  -2    5.78    0.59
   1  -3   2    6.16    0.53
   1   3   2    5.13    0.77
  -1   3  -2    4.92    0.69
  -2  -3  -2    1.16    0.39
  -2  -3  -2    2.08    0.61
   2  -3   2    2.22    0.30
  -2  -3  -2    2.18    0.56
   2  -3   2    2.14    0.29
   2   3   2    2.17    0.34
  -2   3  -2    2.24    0.53
  -3  -3  -2   35.61    3.13
   3  -3   2   38.60    3.81
  -3  -3  -2   36.08    3.89
  -3  -3  -2   35.02    3.27
  -3  -3  -2   29.11    3.23
   3   3   2   39.56    3.32
  -3   3  -2   27.77    3.80
  -3   3  -2   25.69    3.33
  -4  -3  -2   73.29    6.06
  -4  -3  -2   61.94    5.88
  -4  -3  -2   64.74    7.12
   4  -3   2   65.99    7.13
  -4   3  -2   50.78    7.06
   4   3   2   72.87    6.23
  -5  -3  -2   21.12    2.30
   5  -3   2   22.54    2.29
  -5  -3  -2   26.27    2.35
  -5  -3  -2   25.18    2.87
  -5  -3  -2   22.07    2.21
   5  -3   2   23.27    2.63
  -5   3  -2   22.44    2.21
  -5   3  -2   19.95    2.89
   5   3   2   24.12    2.31
   6  -3   2    0.87    0.39
  -6  -3  -2    0.80    0.72
   6  -3   2    0.58    0.32
  -6   3  -2    0.72    0.96
  -6   3  -2    0.70    0.22
  -7   3  -2    2.25    1.23
  -7   3  -2    0.40    0.30
  -7   3  -2    0.58    0.38
  -8   3  -2   10.71    1.33
  -8   3  -2   10.74    1.24
  -9   3  -2   -0.21    0.38
 -10   4   2    1.57    0.45
  -9   4   2    4.64    0.67
  -9   4   2    5.14    0.63
  -9   4   2    4.53    0.73
  -8   4   2    4.90    0.77
  -8   4   2    5.93    0.69
  -7   4   2   19.83    2.13
  -7   4   2   24.67    2.80
  -7   4   2   20.99    2.09
  -6  -4   2   13.94    1.76
  -6  -4   2   18.42    2.06
  -6   4   2   14.55    1.54
  -6   4   2   14.41    1.64
  -6   4   2   16.88    2.06
  -5  -4   2   11.97    1.52
   5  -4  -2   13.97    1.71
  -5  -4   2   12.72    1.39
  -5  -4   2   13.28    1.73
  -5   4   2   12.43    1.52
  -5   4   2   13.07    1.75
  -5   4   2   11.74    2.03
  -5   4   2   14.23    1.42
  -5   4   2   13.48    1.33
   4  -4  -2    0.28    0.42
  -4  -4   2    0.79    0.21
  -4  -4   2   -0.02    0.33
  -4  -4   2    0.46    0.50
  -4  -4   2    0.16    0.23
   4   4  -2    0.35    0.16
  -4   4   2    0.12    0.32
  -4   4   2   -0.49    0.66
  -4   4   2    0.71    0.23
  -3  -4   2    1.78    0.31
   3  -4  -2    2.18    0.51
  -3  -4   2    1.65    0.27
  -3  -4   2    2.24    0.58
  -3  -4   2    2.33    0.63
   3   4  -2    1.46    0.24
  -3   4   2    1.84    0.60
  -3   4   2    2.55    0.33
  -3   4   2    1.62    0.45
  -2  -4   2    7.05    1.07
  -2  -4   2    8.06    0.84
  -2  -4   2    8.43    0.84
  -2  -4   2    6.89    1.44
   2  -4  -2    9.79    1.03
  -2   4   2    9.95    0.88
  -2   4   2    8.20    0.77
   2   4  -2    8.79    0.80
  -2   4   2    7.44    1.09
   1  -4  -2   21.23    2.31
  -1  -4   2   26.95    2.34
  -1  -4   2   24.23    2.28
   1   4  -2   24.10    2.16
  -1   4   2   22.97    2.14
  -1   4   2   24.03    2.29
   0  -4  -2    3.24    0.37
   0  -4   2    3.88    0.42
   0  -4  -2    3.37    0.45
   0  -4   2    2.68    0.47
   0   4  -2    3.30    0.42
   0   4   2    2.90    0.49
  -1  -4  -2   13.20    1.14
  -1  -4  -2   10.32    1.14
   1  -4   2   12.11    1.08
   1  -4   2   10.80    1.14
   1   4   2   11.82    1.41
  -1   4  -2   10.98    1.23
  -2  -4  -2    0.03    0.14
  -2  -4  -2    1.21    0.32
   2  -4   2    0.42    0.15
  -2  -4  -2    0.69    0.53
   2  -4   2    0.12    0.18
  -2  -4  -2    0.32    0.47
  -2   4  -2    0.06    0.39
   2   4   2    0.04    0.20
  -2   4  -2    0.38    0.39
  -3  -4  -2    1.04    0.22
   3  -4   2    1.03    0.27
   3  -4   2    0.66    0.28
  -3  -4  -2    0.76    0.42
  -3  -4  -2    1.33    0.38
  -3  -4  -2    0.43    0.48
  -3   4  -2    1.02    0.47
  -3   4  -2    0.55    0.51
   3   4   2    1.32    0.27
  -4  -4  -2   65.03    5.63
  -4  -4  -2   60.08    5.49
   4  -4   2   63.26    6.66
  -4  -4  -2   58.08    6.63
   4   4   2   64.07    5.80
  -4   4  -2   50.27    6.59
  -5  -4  -2   12.54    1.28
  -5  -4  -2   10.13    1.16
  -5  -4  -2    8.74    1.56
   5  -4   2   10.86    1.35
   5  -4   2   10.63    1.17
  -5   4  -2    7.05    1.55
  -5   4  -2   11.00    1.10
   5   4   2   12.75    1.22
  -6  -4  -2   -0.61    0.62
   6  -4   2   -0.12    0.30
   6  -4   2    0.39    0.29
  -6   4  -2    0.69    0.21
  -6   4  -2   -0.79    0.79
  -7   4  -2   36.14    3.49
  -7   4  -2   34.15    3.73
  -7   4  -2   40.26    4.74
  -8   4  -2   -0.30    0.32
  -8   4  -2   -0.44    0.38
  -8   4  -2   -0.04    0.15
  -9   4  -2    3.16    0.63
 -10   5   2    0.48    0.39
  -9   5   2    1.72    0.49
  -9   5   2    2.29    0.39
  -9   5   2    1.72    0.42
  -8   5   2   11.02    1.26
  -8   5   2   10.50    0.99
  -8   5   2   10.40    1.15
  -8   5   2   12.53    1.26
  -7   5   2    3.43    0.51
  -7   5   2    5.15    0.63
  -6  -5   2    1.20    0.58
  -6  -5   2    1.94    0.57
  -6   5   2    1.77    0.65
  -6   5   2    1.36    0.29
   6   5  -2    1.13    0.81
  -5  -5   2   44.97    5.36
  -5  -5   2   47.57    4.38
  -5  -5   2   39.84    4.68
   5  -5  -2   42.73    4.59
  -5   5   2   52.35    5.43
  -5   5   2   49.53    4.71
  -5   5   2   50.45    4.50
  -5   5   2   40.11    5.48
  -5   5   2   51.33    4.60
  -4  -5   2    1.49    0.61
   4  -5  -2    1.70    0.54
  -4  -5   2    1.57    0.33
  -4  -5   2    1.07    0.46
  -4  -5   2    1.47    0.28
  -4   5   2    0.49    0.40
  -4   5   2    0.86    0.80
  -4   5   2    0.99    0.21
  -4   5   2    1.67    0.31
   4   5  -2    1.46    0.25
  -3  -5   2    1.37    0.28
   3  -5  -2    2.35    0.53
  -3  -5   2    1.27    0.23
  -3  -5   2    3.86    0.77
  -3  -5   2    0.45    0.47
  -3   5   2    1.68    0.45
  -3   5   2    1.54    0.28
   3   5  -2    1.33    0.22
  -3   5   2    0.76    0.54
  -2  -5   2   14.04    2.47
  -2  -5   2   17.02    1.86
  -2  -5   2   17.95    1.70
  -2  -5   2   18.11    1.66
  -2   5   2   15.97    2.02
   2   5  -2   18.64    1.63
  -2   5   2   18.53    2.08
  -2   5   2   16.07    1.62
  -2   5   2   19.78    1.75
   1  -5  -2    2.31    0.47
  -1  -5   2    1.92    0.48
  -1  -5   2    2.79    0.31
   1   5  -2    2.35    0.30
  -1   5   2    2.19    0.32
  -1   5   2    2.09    0.27
   0  -5  -2    5.51    0.72
   0  -5   2    6.85    0.69
   0  -5   2    6.09    0.74
   0  -5  -2    6.79    0.66
   0   5   2    7.01    0.77
   0   5  -2    7.17    0.71
   1  -5   2   13.87    1.46
  -1  -5  -2   14.87    1.44
   1  -5   2   16.19    1.40
  -1  -5  -2   16.40    1.47
  -1   5  -2   13.23    1.52
   1   5   2   14.82    1.68
   2  -5   2    2.30    0.44
  -2  -5  -2    2.61    0.35
   2  -5   2    2.66    0.33
  -2  -5  -2    2.46    0.59
  -2  -5  -2    1.94    0.41
  -2  -5  -2    3.60    0.78
  -2   5  -2    3.06    0.58
  -2   5  -2    2.42    0.58
   2   5   2    2.87    0.48
  -3  -5  -2   40.04    4.50
  -3  -5  -2   42.28    3.78
   3  -5   2   36.31    3.71
  -3  -5  -2   41.75    3.68
   3  -5   2   46.63    4.48
  -3  -5  -2   35.18    3.88
   3   5   2   43.03    3.90
  -3   5  -2   40.04    3.94
  -3   5  -2   34.83    4.45
  -4  -5  -2   25.10    2.30
  -4  -5  -2   22.64    2.17
   4  -5   2   26.11    2.66
  -4  -5  -2   21.83    2.74
  -4   5  -2   22.49    2.22
   4   5   2   25.43    2.31
  -4   5  -2   18.36    2.71
  -4   5  -2   18.88    2.54
  -5  -5  -2   14.57    2.02
  -5  -5  -2   13.80    1.41
   5  -5   2   14.07    1.47
   5  -5   2   16.41    1.74
  -5  -5  -2   15.68    1.56
  -5  -5  -2   11.88    1.46
  -5   5  -2   12.70    2.00
  -5   5  -2   13.82    1.39
  -6  -5  -2    3.40    0.48
   6  -5   2    1.62    0.51
  -6   5  -2    2.08    0.36
  -6   5  -2    1.29    0.94
  -7   5  -2    6.25    0.99
  -7   5  -2    8.67    0.91
  -7   5  -2    5.85    1.82
  -8   5  -2   15.20    1.64
  -8   5  -2   11.54    1.22
  -8   5  -2   15.26    1.49
  -8   5  -2   13.12    1.49
  -8   5  -2   16.17    1.60
  -9   5  -2    1.40    0.46
  -9   5  -2    2.07    0.42
 -10   6   2    0.49    0.40
  -9   6   2   11.35    1.26
  -9   6   2   10.15    1.13
  -9   6   2   10.11    1.28
  -8   6   2    5.06    0.57
  -8   6   2    5.98    0.76
  -8   6   2    7.49    0.87
  -8   6   2    6.05    0.71
  -7   6   2  110.11   11.14
  -7   6   2  125.98   11.14
  -6  -6   2    3.89    0.80
  -6   6   2    4.65    1.00
   6   6  -2    3.12    1.06
  -6   6   2    4.52    0.56
  -5  -6   2  289.67   31.64
  -5  -6   2  291.52   26.08
  -5  -6   2  265.68   26.55
   5  -6  -2  262.43   26.48
  -5   6   2  316.44   27.46
  -5   6   2  316.97   27.32
  -5   6   2  315.50   27.87
  -5   6   2  255.72   30.96
  -4  -6   2   54.34    6.28
   4  -6  -2   54.08    5.30
  -4  -6   2   46.13    5.34
  -4  -6   2   55.91    5.08
  -4   6   2   55.04    6.25
  -4   6   2   42.88    6.21
   4   6  -2   62.73    5.05
  -4   6   2   58.04    5.27
  -4   6   2   59.95    5.35
   3  -6  -2    0.68    0.45
  -3  -6   2    0.66    0.51
  -3  -6   2    0.96    0.20
  -3  -6   2    0.07    0.48
  -3  -6   2    1.41    0.27
  -3   6   2    1.16    0.25
  -3   6   2    1.69    0.43
  -3   6   2    1.18    0.54
   3   6  -2    1.00    0.20
  -2  -6   2   12.09    2.41
   2  -6  -2   18.14    1.76
  -2  -6   2   16.30    1.60
  -2  -6   2   16.86    1.57
  -2  -6   2   16.29    1.77
  -2   6   2   17.62    1.98
  -2   6   2   17.82    1.65
  -2   6   2   15.00    1.93
  -2   6   2   15.92    1.56
   2   6  -2   17.21    1.55
  -1  -6   2    4.69    0.48
  -1  -6   2    4.50    0.66
   1  -6  -2    4.33    0.67
   1   6  -2    4.65    0.49
  -1   6   2    4.47    0.52
  -1   6   2    4.75    0.49
   0  -6  -2   36.47    3.37
   0  -6   2   37.40    3.34
   0  -6   2   33.72    3.47
   0   6   2   38.79    3.49
   0   6   2   35.07    3.28
   0   6  -2   36.95    3.32
   1  -6   2    3.40    0.53
   1  -6   2    2.98    0.34
   1  -6   2    2.82    0.35
  -1  -6  -2    3.76    0.46
  -1  -6  -2    2.59    0.39
   1   6   2    2.82    0.66
  -1   6  -2    2.16    0.45
   2  -6   2   23.11    2.38
  -2  -6  -2   21.12    1.94
  -2  -6  -2   27.16    2.67
  -2  -6  -2   21.46    2.13
   2  -6   2   20.30    1.93
  -2  -6  -2   16.58    1.97
  -2   6  -2   19.82    2.38
   2   6   2   20.44    2.17
  -2   6  -2   21.45    2.14
  -3  -6  -2   51.21    5.67
   3  -6   2   45.18    4.70
  -3  -6  -2   49.91    4.66
  -3  -6  -2   44.07    4.93
  -3  -6  -2   52.53    4.75
   3  -6   2   56.20    5.68
   3   6   2   55.94    4.96
  -3   6  -2   57.43    4.91
  -3   6  -2   53.87    4.94
  -3   6  -2   45.01    5.62
  -4  -6  -2    2.06    0.67
  -4  -6  -2    1.01    0.39
  -4  -6  -2    1.11    0.29
   4  -6   2    1.39    0.38
  -4   6  -2    0.65    0.55
   4   6   2    1.88    0.38
  -4   6  -2    1.26    0.74
  -4   6  -2    1.97    0.27
  -5  -6  -2  132.93   10.57
  -5  -6  -2  109.57   12.43
   5  -6   2  122.43   12.65
  -5  -6  -2  110.03   11.08
  -5  -6  -2  106.78   10.42
   5  -6   2  118.98   10.98
  -5   6  -2  111.44   12.47
  -5   6  -2  114.83   10.89
   6  -6   2    0.53    0.39
  -6  -6  -2    0.08    0.23
  -6  -6  -2   -1.05    0.59
  -6   6  -2    0.40    0.21
  -6   6  -2    0.01    0.67
   7  -6   2    4.54    0.93
  -7   6  -2    4.37    0.76
  -7   6  -2    5.38    0.68
  -7   6  -2    5.20    1.51
  -7   6  -2    5.27    0.60
  -8   6  -2   11.24    1.17
  -8   6  -2   13.62    1.57
  -8   6  -2   12.89    1.41
  -8   6  -2   13.98    1.54
  -8   6  -2   13.93    1.42
  -9   6  -2    0.75    0.39
  -9   6  -2    0.73    0.34
 -10   6  -2    3.11    0.57
 -10   7   2    0.65    0.40
 -10   7   2    0.72    0.29
  -9   7   2    1.95    0.51
  -9   7   2    2.59    0.43
  -9   7   2    2.68    0.49
  -8   7   2    1.09    0.30
  -8   7   2    0.94    0.19
  -8   7   2    1.11    0.40
  -8   7   2    1.72    0.37
   7  -7  -2    1.52    0.65
  -7   7   2    1.19    0.28
  -7   7   2    0.85    0.33
  -6  -7   2    6.27    1.09
  -6   7   2    9.63    1.46
  -6   7   2    8.06    0.87
  -6   7   2    8.19    0.88
   6   7  -2    7.38    1.44
  -5  -7   2    6.75    1.11
  -5  -7   2    8.58    1.01
  -5  -7   2    6.65    1.29
  -5  -7   2    8.45    1.31
   5  -7  -2    6.50    1.13
  -5   7   2    9.22    0.90
  -5   7   2    5.97    1.71
  -5   7   2    8.92    0.98
  -5   7   2    9.82    1.39
   4  -7  -2   49.07    5.12
  -4  -7   2   50.32    6.10
  -4  -7   2   42.12    5.19
  -4  -7   2   53.91    4.93
   4   7  -2   56.63    4.89
  -4   7   2   56.99    5.11
  -4   7   2   59.26    5.19
  -4   7   2   42.08    6.01
  -4   7   2   64.44    6.13
  -3  -7   2   62.28    5.64
  -3  -7   2   50.66    6.70
  -3  -7   2   59.31    5.36
   3  -7  -2   59.58    5.55
  -3   7   2   64.16    6.58
  -3   7   2   47.74    6.40
   3   7  -2   62.43    5.33
  -3   7   2   62.30    5.63
   2  -7  -2   59.34    4.83
  -2  -7   2   47.91    4.83
  -2  -7   2   42.56    6.07
  -2  -7   2   52.30    4.82
  -2  -7   2   52.67    4.64
  -2   7   2   47.34    4.63
  -2   7   2   48.86    5.53
   2   7  -2   51.84    4.62
  -2   7   2   50.71    4.87
  -2   7   2   54.79    5.69
   1  -7  -2    4.64    0.71
  -1  -7   2    4.62    0.50
  -1  -7   2    5.24    0.55
  -1  -7   2    6.08    0.73
  -1   7   2    4.39    0.55
  -1   7   2    4.49    0.53
  -1   7   2    5.06    0.78
   1   7  -2    4.65    0.53
   0  -7  -2    8.93    0.97
   0  -7   2    9.84    0.91
   0  -7   2    7.96    0.93
   0   7   2    8.91    0.93
   0   7   2    8.44    0.86
   0   7  -2    9.48    0.93
  -1  -7  -2    1.56    0.29
   1  -7   2    1.04    0.35
  -1  -7  -2    1.94    0.35
   1  -7   2    0.96    0.20
   1  -7   2    1.57    0.23
  -1  -7  -2    0.99    0.24
   1   7   2    0.74    0.37
   1   7   2    1.07    0.66
  -1   7  -2    1.05    0.34
  -2  -7  -2   17.09    1.70
   2  -7   2   20.44    2.12
  -2  -7  -2   18.04    1.75
  -2  -7  -2   19.32    1.87
   2  -7   2   17.04    1.69
   2   7   2   15.47    2.00
   2   7   2   20.71    2.31
  -2   7  -2   18.58    2.12
  -2   7  -2   18.32    1.90
  -3  -7  -2    0.03    0.26
  -3  -7  -2    0.12    0.53
   3  -7   2    0.49    0.20
  -3  -7  -2    0.95    0.25
   3  -7   2    0.33    0.28
  -3  -7  -2    0.25    0.69
  -3   7  -2    0.22    0.18
   3   7   2    0.20    0.31
  -3   7  -2    0.12    0.52
  -3   7  -2    0.51    0.57
  -4  -7  -2  146.50   15.59
   4  -7   2  164.48   15.91
  -4  -7  -2  131.38   13.93
  -4  -7  -2  163.82   13.22
  -4  -7  -2  140.94   13.11
  -4   7  -2  164.31   13.72
  -4   7  -2  128.01   15.56
  -4   7  -2  120.82   13.37
  -5  -7  -2   16.02    1.73
   5  -7   2   17.66    1.74
  -5  -7  -2   18.21    1.78
   5  -7   2   19.04    2.08
  -5  -7  -2   15.73    2.22
  -5  -7  -2   15.22    1.66
  -5   7  -2   15.86    2.21
  -5   7  -2   16.76    1.66
  -6  -7  -2   35.81    3.97
  -6  -7  -2   35.58    3.27
   6  -7   2   35.03    3.80
  -6   7  -2   26.42    3.32
  -6   7  -2   34.63    4.02
  -6   7  -2   33.76    3.17
   7  -7   2    0.55    0.51
  -7   7  -2    0.35    0.29
  -7   7  -2    0.63    0.34
  -7   7  -2    0.65    0.22
  -7   7  -2    1.26    1.04
  -8   7  -2    2.37    0.63
  -8   7  -2    1.85    0.46
  -8   7  -2    2.00    0.33
  -8   7  -2    2.41    0.43
  -8   7  -2    2.73    0.60
  -9   7  -2    1.78    0.41
  -9   7  -2    1.90    0.61
  -9   7  -2    1.97    0.57
  -9   7  -2    0.49    0.40
 -10   7  -2    3.77    0.62
 -10   8   2    0.78    0.30
 -10   8   2    0.78    0.42
  -9   8   2    7.48    0.72
  -9   8   2    8.85    0.89
  -9   8   2    7.05    0.96
  -9   8   2    6.52    0.91
  -8   8   2    3.09    0.50
  -8   8   2    2.93    0.47
  -8   8   2    3.01    0.35
  -8   8   2    3.04    0.55
  -7   8   2   27.15    2.48
  -7   8   2   22.75    2.42
  -6  -8   2    1.90    0.51
  -6  -8   2    0.30    0.47
  -6   8   2    1.70    0.31
  -6   8   2    1.50    0.30
  -6   8   2    2.17    1.40
   5  -8  -2    0.22    0.49
  -5  -8   2    1.02    0.48
   5  -8  -2    1.32    0.40
  -5  -8   2    0.40    0.63
  -5  -8   2    0.29    0.29
  -5  -8   2    0.34    0.41
  -5   8   2   -1.18    0.87
  -5   8   2    0.84    0.21
  -5   8   2    1.39    0.58
  -5   8   2    0.77    0.29
   4  -8  -2    0.41    0.44
  -4  -8   2    0.47    0.25
  -4  -8   2    1.55    0.63
  -4  -8   2    0.38    0.42
  -4  -8   2    0.94    0.41
  -4   8   2    0.38    0.38
  -4   8   2    0.21    0.61
  -4   8   2    0.38    0.22
   4   8  -2    0.64    0.20
  -4   8   2    0.46    0.17
   3  -8  -2  189.55   16.69
  -3  -8   2  175.99   16.40
  -3  -8   2  158.30   20.07
  -3  -8   2  187.89   16.77
   3   8  -2  189.63   16.38
  -3   8   2  193.88   19.95
  -3   8   2  184.99   17.26
  -2  -8   2    2.97    0.62
  -2  -8   2    2.51    1.13
  -2  -8   2    2.98    0.40
   2  -8  -2    3.14    0.58
   2   8  -2    2.79    0.37
  -2   8   2    2.97    0.58
  -2   8   2    2.99    0.40
  -2   8   2    3.21    0.63
  -2   8   2    3.39    0.51
  -1  -8   2  488.75   42.75
  -1  -8   2  462.57   44.96
  -1  -8   2  521.74   52.11
   1  -8  -2  461.20   43.28
  -1  -8   2  434.93   43.25
  -1   8   2  537.17   42.75
   1   8  -2  474.58   42.75
  -1   8   2  517.10   50.28
  -1   8   2  428.85   45.00
   0  -8   2   13.00    1.70
   0  -8   2   13.79    1.22
   0  -8  -2   10.64    1.25
   0  -8   2   11.50    1.23
   0   8   2   11.43    1.16
   0   8   2   13.82    1.58
   0   8  -2   13.41    1.22
   0   8   2   12.29    1.23
   1  -8   2  294.10   31.56
  -1  -8  -2  326.66   30.35
   1  -8   2  324.91   36.36
  -1  -8  -2  372.22   30.02
   1  -8   2  335.62   30.30
  -1   8  -2  330.49   30.07
  -1   8  -2  322.52   35.25
   1   8   2  388.06   31.65
  -2  -8  -2   20.21    1.98
  -2  -8  -2   20.47    1.94
   2  -8   2   23.78    2.41
   2  -8   2   19.88    1.93
  -2  -8  -2   21.84    2.09
  -2   8  -2   20.24    2.38
   2   8   2   22.43    2.54
  -2   8  -2   21.68    2.19
   2   8   2   15.67    2.18
   3  -8   2  101.90   10.08
   3  -8   2   83.85    8.35
  -3  -8  -2   80.45    8.69
  -3  -8  -2   90.74    8.29
  -3  -8  -2   92.58    8.35
  -3   8  -2   91.88    9.90
  -3   8  -2   99.82    8.56
   3   8   2   89.95    8.83
  -3   8  -2   96.01    8.72
  -4  -8  -2   43.28    3.95
  -4  -8  -2   37.76    4.07
  -4  -8  -2   41.02    3.87
   4  -8   2   48.23    4.74
  -4  -8  -2   43.09    4.78
  -4   8  -2   45.08    3.99
  -4   8  -2   38.78    4.75
  -4   8  -2   34.05    4.17
  -5  -8  -2   61.84    6.93
  -5  -8  -2   56.41    6.02
   5  -8   2   61.51    5.99
   5  -8   2   71.30    6.96
  -5  -8  -2   56.70    5.70
  -5   8  -2   68.40    5.91
  -5   8  -2   58.96    6.94
  -6  -8  -2   34.37    3.04
   6  -8   2   32.50    3.56
  -6   8  -2   25.76    3.08
  -6   8  -2   30.31    3.73
  -6   8  -2   31.57    2.91
  -6   8  -2   28.44    2.93
   7  -8   2   14.57    2.03
  -7   8  -2   15.45    1.56
  -7   8  -2   18.89    1.65
  -7   8  -2   12.66    2.34
  -7   8  -2   13.96    1.70
  -8   8  -2    0.57    0.32
  -8   8  -2    1.04    0.37
  -8   8  -2    0.33    0.45
  -8   8  -2    1.45    0.26
  -8   8  -2    1.38    0.45
  -8   8  -2    0.68    0.25
  -9   8  -2    1.73    0.61
  -9   8  -2    1.46    0.40
  -9   8  -2    1.54    0.56
  -9   8  -2    0.95    0.42
  -9   8  -2    1.54    0.24
 -10   8  -2    6.40    0.85
 -10   9   2    3.99    0.60
 -10   9   2    2.65    0.46
  -9   9   2    0.16    0.26
  -9   9   2    0.43    0.16
  -9   9   2    0.54    0.34
  -8   9   2   48.36    4.60
  -8   9   2   42.91    4.54
  -8   9   2   49.62    4.13
  -8   9   2   47.50    4.78
   7  -9  -2    0.76    0.61
  -7   9   2    0.75    0.27
  -7   9   2    0.84    0.33
  -6  -9   2    6.60    0.91
  -6  -9   2    4.45    0.92
  -6   9   2    7.67    2.02
  -6   9   2    6.29    0.72
  -6   9   2    6.26    0.72
  -5  -9   2    2.26    0.86
   5  -9  -2    2.70    0.72
  -5  -9   2    4.22    0.63
  -5  -9   2    2.14    0.68
   5  -9  -2    4.62    0.68
  -5   9   2    5.67    1.00
  -5   9   2    5.50    0.56
  -5   9   2    5.17    0.67
  -5   9   2    3.74    1.45
   4  -9  -2   48.73    4.38
  -4  -9   2   41.93    5.21
  -4  -9   2   44.10    4.19
   4  -9  -2   43.82    4.47
  -4  -9   2   46.71    4.49
  -4  -9   2   37.81    4.52
  -4   9   2   34.12    5.14
  -4   9   2   51.19    4.33
   4   9  -2   49.24    4.16
  -4   9   2   50.09    5.23
  -4   9   2   46.61    4.40
  -3  -9   2   46.59    6.13
   3  -9  -2   52.66    4.99
  -3  -9   2   58.69    5.11
  -3  -9   2   51.10    4.82
  -3   9   2   52.37    5.06
   3   9  -2   57.40    4.81
  -3   9   2   45.73    5.80
  -3   9   2   57.53    5.96
  -2  -9   2  102.37    8.66
   2  -9  -2  101.24    8.86
  -2  -9   2   85.45   10.95
  -2  -9   2   97.92    8.91
  -2   9   2   88.99   10.26
  -2   9   2   95.15    9.10
  -2   9   2   99.62   10.55
   2   9  -2   95.06    8.64
  -1  -9   2    2.03    0.43
  -1  -9   2    2.74    0.90
   1  -9  -2    1.94    0.44
  -1  -9   2    2.43    0.32
   1  -9  -2    1.96    0.49
  -1   9   2    2.58    0.54
   1   9  -2    2.26    0.33
  -1   9   2    2.15    0.31
  -1   9   2    2.56    0.36
   0  -9   2  394.90   38.71
   0  -9   2  360.03   44.63
   0  -9  -2  469.58   36.79
   0  -9  -2  404.73   37.21
   0  -9   2  431.59   37.17
   0   9   2  395.12   38.70
   0   9  -2  422.19   36.81
   0   9   2  421.44   36.77
  -1  -9  -2    2.43    0.45
   1  -9   2    3.65    0.58
  -1  -9  -2    3.41    0.40
   1  -9   2    3.19    0.38
   1  -9   2    2.34    0.34
  -1   9  -2    2.58    0.49
   1   9   2    3.22    0.78
   1   9   2    2.51    0.45
   1   9   2    2.61    0.38
  -2  -9  -2    1.91    0.48
   2  -9   2    2.08    0.31
  -2  -9  -2    1.83    0.31
   2  -9   2    2.35    0.47
   2   9   2    1.87    0.70
  -2   9  -2    2.29    0.51
  -2   9  -2    1.16    0.52
   2   9   2    1.30    0.54
  -3  -9  -2   10.79    1.24
  -3  -9  -2   11.89    1.20
   3  -9   2   11.82    1.50
  -3  -9  -2   13.93    1.82
  -3   9  -2   11.49    1.56
   3   9   2   10.57    1.66
  -3   9  -2   12.66    1.24
  -3   9  -2   13.84    1.65
  -4  -9  -2    8.24    1.02
  -4  -9  -2   10.99    1.03
  -4  -9  -2    7.19    1.39
   4  -9   2   11.65    1.32
  -4   9  -2    9.01    1.51
  -4   9  -2    7.54    1.46
  -4   9  -2   10.04    0.98
  -5  -9  -2    3.04    0.52
   5  -9   2    3.28    0.68
  -5  -9  -2    2.59    0.46
   5  -9   2    3.43    0.52
   5   9   2    2.59    0.55
  -5   9  -2    5.11    1.05
  -5   9  -2    3.31    0.43
   6  -9   2    0.46    0.42
  -6  -9  -2    0.57    0.29
  -6  -9  -2   -0.01    0.35
  -6   9  -2    0.61    0.24
  -6   9  -2    1.04    0.21
  -6   9  -2    0.14    0.23
  -6   9  -2    0.51    0.74
   7  -9   2   10.78    1.75
  -7   9  -2   10.67    1.42
  -7   9  -2   15.11    1.39
  -7   9  -2   13.30    1.30
  -7   9  -2   12.90    2.18
  -8   9  -2    8.56    1.02
  -8   9  -2    7.60    1.02
  -8   9  -2    7.45    0.95
  -8   9  -2    7.50    0.83
  -8   9  -2    7.40    0.77
  -8   9  -2    6.93    0.93
  -9   9  -2    2.11    0.29
  -9   9  -2    2.73    0.49
  -9   9  -2    2.66    0.64
  -9   9  -2    2.65    0.58
 -10   9  -2    3.57    0.62
 -10  10   2   -0.13    0.24
 -10  10   2    0.42    0.41
  -9  10   2    2.12    0.47
  -9  10   2    2.16    0.29
  -9  10   2    2.44    0.43
  -8  10   2    1.64    0.36
  -8  10   2    1.64    0.39
  -8  10   2    1.77    0.44
  -8  10   2    1.33    0.22
   7 -10  -2   29.42    3.99
  -7  10   2   31.79    3.24
  -7  10   2   37.58    3.29
  -6 -10   2    4.54    0.51
   6 -10  -2    4.49    0.96
  -6 -10   2    4.24    0.72
  -6 -10   2    3.89    0.85
  -6  10   2    6.05    0.62
  -6  10   2    4.20    0.59
  -6  10   2    4.24    0.81
  -6  10   2    3.19    1.65
   5 -10  -2   17.38    1.86
  -5 -10   2   15.23    2.14
  -5 -10   2   14.52    1.93
  -5 -10   2   19.47    1.78
   5 -10  -2   16.13    1.90
  -5  10   2   13.25    2.64
  -5  10   2   19.74    1.75
  -4 -10   2   10.93    1.77
   4 -10  -2   14.30    1.46
  -4 -10   2   13.93    1.66
   4 -10  -2   12.09    1.36
  -4 -10   2   10.26    1.25
  -4 -10   2   12.50    1.26
  -4 -10   2   10.94    1.47
  -4  10   2   10.37    1.85
  -4  10   2   15.81    1.75
  -4  10   2   12.37    1.25
  -4  10   2   12.10    1.31
   4  10  -2   14.44    1.26
  -3 -10   2   52.86    5.24
  -3 -10   2   60.45    6.76
  -3 -10   2   62.17    5.53
   3 -10  -2   57.94    5.42
  -3  10   2   50.49    6.32
  -3  10   2   61.45    6.47
   3  10  -2   61.15    5.24
  -3  10   2   57.20    5.51
  -2 -10   2    9.05    1.17
  -2 -10   2    9.36    0.93
   2 -10  -2    9.22    1.12
  -2 -10   2    9.17    1.99
  -2  10   2   11.03    1.29
  -2  10   2    8.15    0.94
   2  10  -2    9.23    0.91
   1 -10  -2   21.83    2.57
  -1 -10   2   22.61    2.19
  -1 -10   2   22.29    2.08
   1 -10  -2   23.34    2.24
  -1 -10   2   26.74    2.97
   1  10  -2   22.66    2.10
  -1  10   2   23.10    2.11
  -1  10   2   21.50    2.18
  -1  10   2   22.10    2.57
   0 -10  -2  162.33   13.05
   0 -10   2  122.24   15.91
   0 -10  -2  147.82   13.25
   0 -10   2  151.69   13.20
   0 -10   2  139.46   13.71
   0  10   2  166.56   15.45
   0  10   2  134.63   13.70
   0  10   2  143.55   13.04
   0  10  -2  144.76   13.08
   0  10  -2  146.31   15.31
   1 -10   2   26.47    2.81
   1 -10   2   30.38    3.37
  -1 -10  -2   34.91    2.73
   1 -10   2   29.58    2.73
  -1 -10  -2   28.08    2.79
  -1  10  -2   31.46    2.84
  -1  10  -2   30.08    3.22
   1  10   2   27.51    2.71
   1  10   2   37.41    3.50
   1  10   2   25.72    2.83
  -2 -10  -2   30.72    2.84
  -2 -10  -2   33.03    2.68
   2 -10   2   28.74    2.68
   2 -10   2   27.96    3.29
  -2  10  -2   21.90    2.76
  -2  10  -2   28.75    3.23
   2  10   2   27.20    2.67
   2  10   2   32.55    3.38
  -3 -10  -2    1.66    0.35
  -3 -10  -2    4.55    1.00
   3 -10   2    2.70    0.56
   3  10   2    1.81    0.67
  -3  10  -2    1.73    0.61
  -3  10  -2    2.19    0.72
  -4 -10  -2   68.07    7.21
  -4 -10  -2   75.33    6.83
  -4 -10  -2   69.78    7.24
   4 -10   2   90.11    8.35
   4  10   2   69.33    6.85
  -4  10  -2   81.02    7.09
  -4  10  -2   75.11    8.26
   4  10   2   69.17    8.16
  -5 -10  -2   20.42    1.96
   5 -10   2   18.99    2.00
  -5 -10  -2   18.84    2.00
   5 -10   2   21.43    2.41
  -5  10  -2   21.60    2.62
  -5  10  -2   20.78    1.94
   5  10   2   18.72    1.99
   5  10   2   15.72    2.45
  -6 -10  -2    5.51    0.86
  -6 -10  -2    5.50    0.76
   6 -10   2    5.35    1.01
  -6  10  -2    6.89    0.70
  -6  10  -2    5.83    0.66
  -6  10  -2    5.02    0.75
  -6  10  -2    5.43    1.29
  -7 -10  -2   13.97    1.34
   7 -10   2   10.21    1.63
  -7  10  -2    9.38    1.29
  -7  10  -2    9.24    1.91
  -7  10  -2   11.32    1.19
  -7  10  -2   13.15    1.27
  -8  10  -2    1.57    0.27
  -8  10  -2    0.75    0.39
  -8  10  -2    0.51    0.41
  -8  10  -2    1.46    0.38
  -8  10  -2    1.47    0.31
  -8  10  -2    1.19    0.39
  -9  10  -2    0.95    0.19
  -9  10  -2    1.03    0.38
  -9  10  -2    0.82    0.43
  -9  10  -2    0.41    0.45
 -10  10  -2    0.30    0.40
 -10  11   2    3.19    0.59
 -10  11   2    2.94    0.47
  -9  11   2    7.00    0.82
  -9  11   2    4.80    0.71
  -9  11   2    5.92    0.60
  -8  11   2    0.53    0.28
  -8  11   2    0.30    0.15
  -8  11   2    0.77    0.32
  -8  11   2    1.01    0.38
   7 -11  -2    6.88    1.37
  -7  11   2    7.05    0.88
  -7  11   2    8.40    0.92
  -6 -11   2   54.30    4.92
  -6 -11   2   43.66    5.50
  -6 -11   2   58.84    5.17
   6 -11  -2   61.43    6.35
  -6  11   2   61.22    5.29
  -6  11   2   64.77    5.29
  -6  11   2   43.47    5.59
  -6  11   2   45.14    6.65
  -5 -11   2    5.52    0.77
   5 -11  -2    4.35    0.86
   5 -11  -2    7.07    1.10
  -5 -11   2    6.11    0.68
   5 -11  -2    5.55    0.80
  -5 -11   2    6.04    1.18
  -5 -11   2    5.28    0.93
  -5  11   2    7.64    1.73
  -5  11   2    6.01    0.67
   5  11  -2    6.39    0.76
  -5  11   2    5.35    0.78
  -4 -11   2   80.55    7.93
  -4 -11   2   79.97    7.69
   4 -11  -2   79.10    7.56
  -4 -11   2   86.29    7.79
   4 -11  -2   81.01    7.86
  -4 -11   2   80.64    7.39
  -4  11   2   67.31    8.92
  -4  11   2   80.64    7.76
  -4  11   2   88.12    7.69
  -3 -11   2    0.20    0.71
  -3 -11   2    0.69    0.25
  -3 -11   2    0.42    0.46
   3 -11  -2    0.81    0.40
  -3 -11   2    0.33    0.33
  -3  11   2    0.37    0.50
  -3  11   2    0.60    0.21
   3  11  -2    0.43    0.20
  -2 -11   2    2.51    1.22
   2 -11  -2    1.82    0.45
  -2 -11   2    1.63    0.31
   2 -11  -2    1.64    0.52
  -2 -11   2    1.93    0.53
  -2  11   2    1.44    0.52
  -2  11   2    2.05    0.31
   2  11  -2    1.71    0.31
   1 -11  -2   61.70    7.10
  -1 -11   2   65.86    5.83
  -1 -11   2   67.74    5.97
   1 -11  -2   63.45    5.99
  -1  11   2   61.25    6.11
   1  11  -2   68.43    5.85
  -1  11   2   70.12    5.87
   1  11  -2   61.15    6.82
  -1  11   2   62.26    6.95
   0 -11  -2    0.53    0.28
   0 -11   2   -0.05    0.43
   0 -11  -2    0.42    0.18
   0 -11   2    0.49    0.18
   0 -11   2    0.54    0.23
   0  11  -2    0.12    0.22
   0  11   2    0.66    0.20
   0  11   2    0.45    0.15
   0  11   2   -0.24    0.38
   0  11  -2    0.67    0.24
  -1 -11  -2   51.22    4.62
  -1 -11  -2   55.16    4.52
   1 -11   2   46.40    5.54
   1 -11   2   49.77    4.55
   1 -11   2   45.11    4.70
  -1  11  -2   49.91    5.33
   1  11   2   44.47    4.50
  -1  11  -2   51.90    4.64
   1  11   2   57.73    5.53
   2 -11   2    3.19    0.45
   2 -11   2    4.90    0.73
  -2 -11  -2    3.15    0.47
  -2 -11  -2    4.42    0.70
  -2  11  -2    3.55    0.63
   2  11   2    2.90    0.47
  -2  11  -2    3.10    0.65
   2  11   2    5.13    0.94
  -3 -11  -2    4.87    0.62
   3 -11   2    6.39    0.93
  -3 -11  -2    4.36    0.63
  -3 -11  -2    6.20    1.13
  -3  11  -2    5.30    1.00
  -3  11  -2    5.09    0.97
   3  11   2    6.20    1.03
   3  11   2    5.37    0.69
  -4 -11  -2  356.72   33.19
  -4 -11  -2  362.17   33.92
  -4 -11  -2  363.94   35.30
  -4  11  -2  406.47   34.80
  -4  11  -2  375.04   39.22
   4  11   2  367.11   39.10
   4  11   2  365.09   33.22
   5 -11   2    9.87    1.28
  -5 -11  -2    8.20    0.95
   5 -11   2    5.77    0.86
  -5 -11  -2    7.18    0.87
  -5  11  -2    7.44    0.79
   5  11   2    5.95    1.23
  -5  11  -2    8.98    1.50
   5  11   2    7.34    0.96
  -6 -11  -2   67.79    6.36
   6 -11   2   64.35    7.35
  -6 -11  -2   63.46    5.82
  -6 -11  -2   64.73    6.07
  -6  11  -2   73.88    6.24
  -6  11  -2   55.56    6.53
  -6  11  -2   69.36    6.23
  -6  11  -2   62.75    7.37
  -7 -11  -2    0.13    0.31
   7 -11   2   -0.22    0.53
  -7  11  -2    0.36    0.22
  -7  11  -2    0.13    0.27
  -7  11  -2    0.22    0.27
  -7  11  -2    0.67    0.83
  -8  11  -2    3.87    0.42
  -8  11  -2    3.07    0.46
  -8  11  -2    3.89    0.55
  -8  11  -2    2.33    0.53
  -8  11  -2    3.71    0.57
  -8  11  -2    1.81    0.50
  -9  11  -2    4.92    0.74
  -9  11  -2    5.87    0.74
  -9  11  -2    6.04    0.65
  -9  11  -2    4.99    0.78
  -9  11  -2    4.44    0.52
 -10  11  -2    0.12    0.39
 -10  11  -2    0.22    0.46
 -10  12   2   -0.50    0.38
  -9  12   2    4.74    0.54
  -9  12   2    4.81    0.66
  -9  12   2    5.54    0.74
  -8  12   2    2.40    0.45
  -8  12   2    2.08    0.48
  -8  12   2    1.48    0.39
  -8  12   2    2.12    0.29
  -7 -12   2    1.33    0.27
   7 -12  -2    0.21    0.61
  -7  12   2    0.98    0.31
  -7  12   2    1.08    0.36
  -6 -12   2   -0.20    0.48
   6 -12  -2    0.04    0.47
  -6 -12   2    0.53    0.40
  -6 -12   2    0.15    0.15
  -6  12   2    0.34    0.23
  -6  12   2    0.17    1.28
  -6  12   2    0.45    0.40
  -6  12   2   -0.01    0.20
  -5 -12   2    2.11    0.47
  -5 -12   2    1.42    0.71
   5 -12  -2    2.35    0.66
  -5 -12   2    2.14    0.56
   5 -12  -2    1.80    0.43
  -5 -12   2    2.76    0.37
   5  12  -2    1.52    0.39
  -5  12   2    2.61    0.48
  -5  12   2    2.82    0.38
  -5  12   2    1.25    1.18
  -4 -12   2    0.97    0.57
  -4 -12   2    1.56    0.27
  -4 -12   2    2.52    0.53
   4 -12  -2    0.69    0.45
   4 -12  -2    2.25    0.55
   4 -12  -2    1.20    0.37
  -4 -12   2    0.86    0.33
   4  12  -2    1.84    0.34
  -4  12   2    1.93    0.28
  -4  12   2   -0.40    0.66
  -4  12   2    1.33    0.33
  -3 -12   2  203.14   20.80
  -3 -12   2  181.98   18.01
  -3 -12   2  195.20   17.88
   3 -12  -2  176.54   20.44
   3 -12  -2  177.02   17.10
  -3 -12   2  195.63   17.22
   3 -12  -2  178.45   17.95
  -3 -12   2  208.50   16.86
  -3  12   2  186.86   17.72
   3  12  -2  195.37   16.84
  -3  12   2  170.50   19.94
  -2 -12   2   40.08    5.23
   2 -12  -2   37.89    3.77
  -2 -12   2   41.09    3.62
   2 -12  -2   37.79    4.43
  -2 -12   2   39.40    3.81
  -2  12   2   39.57    4.40
  -2  12   2   38.10    3.78
   2  12  -2   41.22    3.62
  -1 -12   2    1.97    0.79
   1 -12  -2    0.72    0.38
  -1 -12   2    1.71    0.26
  -1 -12   2    2.68    0.44
   1 -12  -2    1.23    0.23
   1 -12  -2    1.18    0.40
  -1  12   2    1.46    0.33
   1  12  -2    1.10    0.30
  -1  12   2    0.61    0.43
  -1  12   2    1.00    0.22
   1  12  -2    0.92    0.26
   0 -12  -2   14.01    1.34
   0 -12   2   12.75    1.72
   0 -12   2   12.13    1.19
   0 -12  -2   12.10    1.20
   0 -12   2   12.96    1.26
   0  12  -2   12.83    1.27
   0  12   2   14.13    1.61
   0  12   2   11.55    1.22
   0  12   2   12.19    1.22
   0  12  -2   12.38    1.43
   1 -12   2    4.71    0.88
  -1 -12  -2    5.32    0.73
   1 -12   2    5.29    0.62
   1 -12   2    5.23    0.59
  -1 -12  -2    5.38    0.62
  -1  12  -2    6.53    0.84
  -1  12  -2    6.22    0.83
   1  12   2    5.81    0.63
   1  12   2    5.28    1.00
  -2 -12  -2   80.53    6.49
   2 -12   2   73.56    7.92
  -2 -12  -2   75.02    6.69
   2 -12   2   70.03    6.52
  -2  12  -2   59.72    6.53
  -2  12  -2   70.91    7.67
   2  12   2   70.48    6.48
  -3 -12  -2   60.54    5.77
   3 -12   2   64.67    7.07
  -3 -12  -2   55.45    6.08
  -3 -12  -2   71.56    6.19
  -3  12  -2   67.58    6.13
   3  12   2   70.97    6.97
  -3  12  -2   64.44    6.93
   3  12   2   62.53    5.79
   4 -12   2    0.63    0.41
  -4 -12  -2    0.58    0.23
  -4 -12  -2   -0.23    0.84
  -4 -12  -2    0.56    0.27
   4  12   2    1.02    0.58
  -4  12  -2    0.27    0.64
   4  12   2    0.82    0.33
  -4  12  -2    0.55    0.17
  -5 -12  -2    3.80    0.59
   5 -12   2    4.62    0.64
   5 -12   2    4.88    0.87
  -5 -12  -2    4.33    0.66
   5  12   2    3.12    0.89
  -5  12  -2    4.89    1.18
   5  12   2    3.83    0.67
  -5  12  -2    4.58    0.55
   6 -12   2    2.90    0.73
  -6 -12  -2    2.61    0.59
  -6 -12  -2    2.13    0.31
  -6 -12  -2    2.39    0.47
  -6  12  -2    1.74    0.41
  -6  12  -2    1.61    0.92
  -6  12  -2    2.12    0.37
  -6  12  -2    2.46    0.37
   7 -12   2    0.81    0.59
  -7 -12  -2    0.95    0.38
  -7  12  -2    0.85    0.26
  -7  12  -2    0.82    0.30
  -7  12  -2    0.67    0.32
  -7  12  -2    0.35    0.81
  -8  12  -2    0.70    0.27
  -8  12  -2    1.24    0.25
  -8  12  -2    0.32    0.32
  -8  12  -2    1.04    0.35
  -8  12  -2    0.72    0.36
  -8  12  -2    0.95    0.38
  -9  12  -2    0.56    0.35
  -9  12  -2   -0.20    0.37
  -9  12  -2    0.12    0.23
  -9  12  -2   -0.09    0.13
  -9  12  -2    0.07    0.34
  -9  13   2    0.19    0.28
  -9  13   2    0.59    0.38
  -9  13   2    0.35    0.19
  -8  13   2   14.46    1.53
  -8  13   2   14.30    1.57
  -8  13   2   14.38    1.34
  -8  13   2   15.23    1.63
  -7 -13   2   18.50    1.80
  -7 -13   2   19.22    2.09
  -7  13   2   15.45    2.26
  -7  13   2   21.22    2.00
  -7  13   2   21.19    1.98
  -6 -13   2    0.40    0.17
  -6 -13   2   -0.10    0.36
   6 -13  -2    0.16    0.52
  -6 -13   2    0.08    0.49
  -6  13   2    1.57    1.38
  -6  13   2    0.63    0.27
  -6  13   2    0.67    0.27
  -6  13   2    1.00    0.43
  -5 -13   2    0.82    0.63
  -5 -13   2    0.56    0.34
  -5 -13   2    0.65    0.45
   5 -13  -2    1.41    0.37
  -5 -13   2    1.22    0.26
   5 -13  -2    1.40    0.57
   5  13  -2    1.70    0.39
  -5  13   2    0.85    0.25
  -5  13   2    1.11    1.04
   4 -13  -2   12.94    1.40
   4 -13  -2   10.40    1.45
  -4 -13   2   13.73    1.33
   4 -13  -2   14.43    1.74
  -4 -13   2   12.60    1.47
  -4 -13   2   12.53    1.64
  -4 -13   2   13.62    1.31
   4  13  -2   12.47    1.30
  -4  13   2   12.70    1.29
  -4  13   2   11.52    1.99
  -4  13   2   11.80    1.35
   3 -13  -2   72.88    8.46
  -3 -13   2   80.42    6.94
  -3 -13   2   76.82    7.44
  -3 -13   2   81.10    7.32
   3 -13  -2   74.58    7.39
   3 -13  -2   70.19    7.09
  -3 -13   2   80.40    7.22
  -3  13   2   68.15    8.33
  -3  13   2   76.60    7.21
   3  13  -2   80.44    6.94
  -3  13   2   76.00    7.28
  -2 -13   2    5.87    0.67
   2 -13  -2    6.00    0.96
  -2 -13   2    5.31    1.71
   2 -13  -2    5.94    0.85
  -2 -13   2    6.50    0.93
  -2  13   2    5.06    0.98
  -2  13   2    6.03    0.67
   2  13  -2    6.08    0.67
  -1 -13   2    0.15    0.27
  -1 -13   2   -0.22    0.52
   1 -13  -2    0.04    0.33
  -1 -13   2    0.00    0.16
   1 -13  -2   -0.15    0.30
  -1  13   2    0.21    0.14
   1  13  -2    0.29    0.21
  -1  13   2    0.53    0.29
  -1  13   2    0.21    0.39
   1  13  -2    0.35    0.22
   0 -13   2  281.56   25.45
   0 -13  -2  279.75   25.50
   0 -13   2  262.27   25.13
   0 -13  -2  285.37   25.15
   0  13   2  305.05   29.67
   0  13  -2  265.83   29.54
   0  13   2  270.31   25.17
   0  13  -2  309.28   25.22
   1 -13   2   21.64    2.37
  -1 -13  -2   26.76    2.31
   1 -13   2   24.80    2.33
   1 -13   2   21.76    2.90
  -1 -13  -2   25.10    2.41
  -1  13  -2   26.07    2.75
  -1  13  -2   28.11    2.47
   1  13   2   24.93    2.90
   1  13   2   24.77    2.32
   2 -13   2   24.02    2.39
   2 -13   2   24.08    2.97
  -2 -13  -2   28.02    2.59
  -2 -13  -2   26.77    2.39
   2 -13   2   23.67    2.45
   2  13   2   25.37    2.39
  -2  13  -2   25.03    2.88
   2  13   2   33.42    3.09
  -2  13  -2   22.61    2.45
  -3 -13  -2   22.36    2.28
  -3 -13  -2   24.77    2.41
  -3 -13  -2   20.20    1.99
   3 -13   2   22.12    2.53
  -3 -13  -2   18.91    2.04
  -3  13  -2   19.63    2.48
  -3  13  -2   20.84    2.50
   3  13   2   20.00    2.00
  -3  13  -2   19.10    1.98
   3  13   2   25.91    2.60
  -4 -13  -2    4.18    0.62
   4 -13   2    7.24    1.03
  -4 -13  -2    7.47    1.42
  -4 -13  -2    5.39    0.71
  -4  13  -2    6.85    1.25
   4  13   2    3.78    0.90
   4  13   2    4.39    0.68
  -4  13  -2    5.16    0.58
  -5 -13  -2   31.82    3.22
   5 -13   2   35.03    3.84
  -5 -13  -2   34.17    3.13
  -5  13  -2   30.13    3.12
  -5  13  -2   34.62    3.99
   6 -13   2    3.80    0.82
  -6 -13  -2    2.04    0.59
  -6 -13  -2    3.63    0.42
  -6 -13  -2    3.52    0.57
  -6  13  -2    4.13    0.52
  -6  13  -2    2.71    0.51
  -6  13  -2    3.08    0.45
  -6  13  -2    3.53    1.13
  -7 -13  -2    6.26    0.74
  -7  13  -2    3.99    0.60
  -7  13  -2    4.75    0.57
  -7  13  -2    2.52    0.55
  -8  13  -2    0.96    0.36
  -8  13  -2    0.72    0.21
  -8  13  -2    0.96    0.35
  -8  13  -2    0.51    0.35
  -8  13  -2    0.82    0.28
  -8  13  -2    0.36    0.35
  -9  13  -2    0.02    0.16
  -9  13  -2    0.44    0.36
  -9  13  -2   -0.09    0.32
  -9  13  -2    0.50    0.25
  -9  13  -2    0.53    0.37
  -9  14   2    4.13    0.46
  -9  14   2    3.95    0.64
  -9  14   2    3.57    0.56
  -8  14   2    1.19    0.23
  -8  14   2    1.31    0.41
  -8  14   2    1.11    0.38
  -8  14   2    1.35    0.41
  -7 -14   2    3.24    0.45
  -7  14   2    2.42    0.69
  -7  14   2    4.57    0.61
  -7  14   2    4.16    0.56
  -6 -14   2    1.44    0.48
  -6 -14   2    1.65    0.26
   6 -14  -2    0.91    0.62
  -6 -14   2    1.13    0.59
  -6  14   2    1.57    0.51
  -6  14   2    1.24    1.37
  -6  14   2    2.15    0.38
  -6  14   2    1.55    0.35
  -5 -14   2    2.19    0.36
  -5 -14   2    1.97    0.28
   5 -14  -2    1.99    0.46
   5 -14  -2    2.78    0.74
  -5 -14   2    2.09    0.59
  -5 -14   2    1.98    0.48
  -5  14   2    2.01    0.35
  -5  14   2    2.23    0.37
   5  14  -2    2.30    0.47
  -5  14   2    0.96    1.20
  -4 -14   2   65.29    5.94
  -4 -14   2   62.74    5.94
   4 -14  -2   53.32    5.77
   4 -14  -2   67.51    6.97
   4 -14  -2   55.90    5.99
  -4 -14   2   59.08    6.06
  -4 -14   2   68.52    5.68
   4  14  -2   62.47    5.65
  -4  14   2   63.47    5.85
  -4  14   2   57.00    5.92
  -4  14   2   65.25    7.02
   3 -14  -2   68.80    6.88
  -3 -14   2   71.58    7.21
  -3 -14   2   78.76    6.74
  -3 -14   2   78.57    7.10
   3 -14  -2   70.72    8.22
  -3 -14   2   73.58    7.00
   3 -14  -2   72.69    7.16
  -3  14   2   72.44    8.12
  -3  14   2   75.40    7.06
  -3  14   2   73.35    6.98
   3  14  -2   75.21    6.72
   2 -14  -2   87.73    8.54
   2 -14  -2   89.01    8.92
  -2 -14   2   95.41    8.36
   2 -14  -2   90.56   10.20
  -2 -14   2   92.19    8.85
  -2 -14   2   95.79    8.61
  -2 -14   2  108.32   10.87
  -2 -14   2  101.35    8.96
  -2  14   2   87.07    8.76
  -2  14   2   87.28    9.96
   2  14  -2   93.40    8.36
  -1 -14   2   14.99    1.53
  -1 -14   2   24.68    2.35
  -1 -14   2   15.63    1.64
   1 -14  -2   16.28    1.99
   1 -14  -2   17.38    1.69
  -1  14   2   15.18    1.57
   1  14  -2   14.06    1.79
   1  14  -2   16.02    1.57
  -1  14   2   17.20    1.62
  -1  14   2   16.92    1.98
   0 -14  -2   51.67    4.62
   0 -14   2   51.35    4.71
   0 -14   2   47.42    4.60
   0 -14  -2   47.85    4.76
   0  14  -2   46.91    5.44
   0  14   2   53.64    4.66
   0  14  -2   53.10    4.69
   0  14   2   57.86    5.60
   1 -14   2   11.28    1.65
  -1 -14  -2   11.40    1.17
  -1 -14  -2   10.67    1.27
   1 -14   2   12.39    1.20
   1  14   2   11.97    1.19
  -1  14  -2   13.17    1.35
  -1  14  -2   11.15    1.43
   1  14   2   11.11    1.63
   2 -14   2    2.52    0.32
   2 -14   2    1.51    0.52
   2 -14   2    1.27    0.31
  -2 -14  -2    1.68    0.50
  -2 -14  -2    0.97    0.26
  -2 -14  -2    1.39    0.33
   2  14   2    1.48    0.35
  -2  14  -2    1.56    0.52
  -2  14  -2    1.33    0.40
   2  14   2    1.54    0.68
  -3 -14  -2    0.56    0.20
  -3 -14  -2    0.31    0.49
  -3 -14  -2    0.57    0.66
   3 -14   2    0.47    0.42
  -3 -14  -2    0.29    0.24
  -3  14  -2    0.13    0.15
   3  14   2    0.23    0.26
   3  14   2   -0.15    0.54
  -3  14  -2   -1.31    0.61
  -3  14  -2    1.18    0.56
  -4 -14  -2   19.76    2.56
  -4 -14  -2   22.02    2.88
  -4 -14  -2   19.76    2.26
   4 -14   2   22.98    2.27
   4 -14   2   27.84    2.82
  -4 -14  -2   25.60    2.24
  -4  14  -2   22.31    2.85
  -4  14  -2   21.16    2.19
   4  14   2   27.98    2.82
   4  14   2   21.41    2.22
   5 -14   2    1.12    0.57
  -5 -14  -2    1.86    0.48
  -5 -14  -2    2.43    0.41
  -5 -14  -2    1.81    0.26
  -5  14  -2    2.32    0.43
  -5  14  -2    1.29    0.84
  -5  14  -2    1.55    0.32
  -5  14  -2    1.97    0.33
  -6 -14  -2    1.32    0.25
  -6 -14  -2    2.13    0.44
  -6 -14  -2    1.66    0.54
   6 -14   2    0.64    0.55
  -6  14  -2    1.67    0.97
  -6  14  -2    1.33    0.35
  -6  14  -2    1.71    0.33
  -6  14  -2    1.23    0.32
  -7 -14  -2   11.71    1.21
  -7 -14  -2   15.07    1.45
  -7  14  -2   12.31    1.35
  -7  14  -2   11.34    1.41
  -7  14  -2   13.56    1.32
  -8  14  -2    1.68    0.29
  -8  14  -2    1.39    0.40
  -8  14  -2    2.02    0.44
  -8  14  -2    1.18    0.40
  -8  14  -2    1.80    0.35
  -8  14  -2    0.94    0.40
  -9  14  -2    0.73    0.36
  -9  14  -2    0.82    0.37
  -9  14  -2    0.64    0.20
  -9  14  -2    1.10    0.41
  -9  14  -2    0.68    0.27
  -9  15   2    9.02    1.00
  -9  15   2    7.17    0.87
  -9  15   2    6.68    0.74
  -8  15   2    6.25    0.79
  -8  15   2    3.71    0.71
  -8  15   2    5.51    0.73
  -8  15   2    5.83    0.58
  -7 -15   2    2.87    0.41
  -7  15   2    3.53    0.39
  -7  15   2    2.18    0.63
  -7  15   2    2.40    0.49
  -7  15   2    3.98    0.56
  -7  15   2    3.45    0.55
  -7  15   2    2.37    0.66
   6 -15  -2   16.15    2.20
  -6 -15   2   16.85    1.74
  -6 -15   2   16.76    1.92
  -6 -15   2   15.03    1.49
  -6  15   2   17.81    1.66
  -6  15   2   11.08    1.81
  -6  15   2   19.88    1.68
  -6  15   2   12.55    2.84
  -5 -15   2    0.95    0.44
   5 -15  -2    0.40    0.33
  -5 -15   2    0.62    0.35
   5 -15  -2    0.26    0.48
  -5 -15   2    0.57    0.22
  -5 -15   2    0.26    0.15
  -5  15   2    0.37    0.32
  -5  15   2    0.43    0.21
  -5  15   2   -0.24    0.93
  -5  15   2    0.18    0.22
  -4 -15   2    8.41    1.28
  -4 -15   2    9.92    1.03
   4 -15  -2    8.93    1.39
   4 -15  -2    7.67    1.03
   4 -15  -2    7.56    1.13
  -4 -15   2    8.93    1.16
  -4 -15   2   10.26    0.97
  -4  15   2    9.06    0.94
  -4  15   2    7.97    1.00
  -4  15   2   10.23    1.75
   4  15  -2    8.96    0.99
   3 -15  -2   70.91    7.23
   3 -15  -2   76.70    8.66
  -3 -15   2   81.50    7.47
  -3 -15   2   76.14    7.59
  -3 -15   2   77.86    7.35
   3 -15  -2   76.29    7.53
  -3 -15   2   88.10    7.09
   3  15  -2   75.53    7.07
  -3  15   2   77.83    7.35
  -3  15   2   77.28    7.42
  -3  15   2   75.65    8.54
  -2 -15   2   40.84    4.56
  -2 -15   2   38.65    3.36
   2 -15  -2   34.27    3.87
   2 -15  -2   30.38    3.22
  -2 -15   2   32.47    3.09
   2 -15  -2   31.36    3.31
  -2 -15   2   31.64    3.28
   2  15  -2   33.53    3.10
  -2  15   2   32.41    3.22
  -2  15   2   32.25    3.81
   1 -15  -2   27.15    2.56
   1 -15  -2   24.62    3.01
  -1 -15   2   24.44    2.51
   1 -15  -2   27.75    2.60
  -1 -15   2   31.76    3.26
  -1 -15   2   22.18    2.38
  -1  15   2   32.28    2.53
   1  15  -2   23.87    2.52
   1  15  -2   25.60    2.43
   1  15  -2   23.69    2.81
  -1  15   2   27.84    3.00
   0 -15  -2   21.38    1.93
   0 -15  -2   19.71    2.06
   0 -15   2   15.90    2.53
   0 -15   2   20.91    2.01
   0 -15   2   18.90    1.92
   0  15  -2   23.47    2.03
   0  15  -2   19.09    2.29
   0  15   2   22.53    2.46
   0  15   2   22.80    2.00
   1 -15   2  242.65   21.75
  -1 -15  -2  244.99   21.83
   1 -15   2  210.61   26.14
  -1 -15  -2  251.87   21.52
   1  15   2  250.34   25.42
   1  15   2  243.72   21.54
  -1  15  -2  239.09   25.30
  -2 -15  -2   22.30    2.15
   2 -15   2   21.87    2.09
  -2 -15  -2   21.53    2.07
  -2 -15  -2   22.46    2.25
  -2 -15  -2   20.13    2.23
   2 -15   2   22.92    2.65
  -2  15  -2   21.87    2.52
   2  15   2   27.61    2.73
   2  15   2   18.20    2.06
  -2  15  -2   20.19    2.16
  -3 -15  -2    8.99    0.92
  -3 -15  -2    8.22    1.34
   3 -15   2    9.25    1.33
   3 -15   2    7.20    0.85
  -3 -15  -2    8.94    1.18
  -3 -15  -2    8.14    0.87
   3  15   2    7.11    0.92
   3  15   2    9.08    1.34
  -3  15  -2    5.18    1.18
  -3  15  -2    6.91    0.81
  -3  15  -2    8.08    1.27
  -4 -15  -2    7.12    0.94
  -4 -15  -2    9.53    1.58
  -4 -15  -2    6.17    1.19
   4 -15   2    8.98    1.34
  -4 -15  -2    6.97    0.85
   4 -15   2    7.82    0.88
   4  15   2    6.08    0.90
  -4  15  -2    9.81    1.47
  -4  15  -2    7.21    0.80
   4  15   2    8.37    1.30
  -5 -15  -2    7.16    1.07
  -5 -15  -2    9.56    0.87
  -5 -15  -2    8.62    1.02
   5 -15   2   10.98    1.53
  -5  15  -2    9.11    1.07
  -5  15  -2    8.44    0.97
  -5  15  -2    8.94    0.98
  -5  15  -2    9.74    1.67
  -6 -15  -2    1.51    0.55
  -6 -15  -2    4.06    0.57
   6 -15   2    1.56    0.69
  -6 -15  -2    2.34    0.34
  -6  15  -2    2.72    0.48
  -6  15  -2    1.94    0.41
  -6  15  -2    3.41    1.10
  -6  15  -2    2.53    0.41
  -7 -15  -2    0.33    0.22
  -7 -15  -2   -0.14    0.18
  -7 -15  -2    0.38    0.34
  -7  15  -2   -0.05    0.25
  -7  15  -2    0.19    0.33
  -7  15  -2    0.31    0.29
  -7  15  -2   -0.17    0.23
  -7  15  -2    0.30    0.17
  -7  15  -2    0.63    0.35
  -8  15  -2    3.63    0.65
  -8  15  -2    4.19    0.65
  -8  15  -2    4.28    0.58
  -8  15  -2    4.51    0.65
  -8  15  -2    4.78    0.53
  -8  15  -2    5.22    0.70
  -9  15  -2    0.95    0.22
  -9  15  -2    1.23    0.43
  -9  15  -2    0.88    0.38
  -9  15  -2    0.81    0.36
  -9  16   2    0.17    0.19
  -9  16   2    0.07    0.31
  -9  16   2   -0.21    0.40
  -8 -16   2    0.41    0.24
  -8  16   2   -0.46    0.31
  -8  16   2    0.50    0.19
  -8  16   2   -0.42    0.35
  -8  16   2   -0.19    0.30
  -7 -16   2    2.86    0.36
  -7 -16   2    1.76    0.33
  -7  16   2    1.70    0.57
  -7  16   2    2.18    0.45
  -7  16   2    3.06    0.34
  -7  16   2    1.63    0.60
  -7  16   2    2.25    0.47
  -7  16   2    2.24    0.48
  -6 -16   2    0.67    0.43
   6 -16  -2   -0.09    0.57
  -6 -16   2    0.27    0.25
  -6 -16   2    0.03    0.48
  -6 -16   2    0.09    0.16
  -6  16   2   -0.09    1.35
  -6  16   2    0.69    0.29
  -6  16   2    0.58    0.41
  -6  16   2   -0.28    0.22
  -5 -16   2    5.92    0.70
  -5 -16   2    5.55    0.81
   5 -16  -2    5.40    1.09
  -5 -16   2    5.90    0.91
  -5 -16   2    5.40    0.57
   5 -16  -2    4.94    0.75
  -5  16   2    5.40    1.58
  -5  16   2    5.04    0.65
  -5  16   2    5.57    0.68
  -5  16   2    4.65    0.77
   4 -16  -2    3.54    0.79
   4 -16  -2    2.32    0.48
  -4 -16   2    3.47    0.44
  -4 -16   2    2.66    0.51
   4 -16  -2    2.07    0.58
  -4 -16   2    2.81    0.75
  -4 -16   2    2.59    0.59
   4  16  -2    3.26    0.52
  -4  16   2    2.22    0.47
  -4  16   2    2.97    0.41
  -4  16   2    1.66    0.96
  -3 -16   2   13.88    1.66
   3 -16  -2   14.79    1.63
  -3 -16   2   17.26    1.54
  -3 -16   2   12.77    1.76
   3 -16  -2   15.44    2.00
  -3 -16   2   17.11    1.55
   3 -16  -2   12.89    1.62
  -3  16   2   14.09    1.56
  -3  16   2   14.73    1.49
   3  16  -2   14.73    1.51
  -3  16   2   18.16    2.16
   2 -16  -2   22.19    2.91
  -2 -16   2   23.48    2.30
  -2 -16   2   24.06    2.50
   2 -16  -2   25.64    2.49
  -2 -16   2   28.93    2.53
   2 -16  -2   24.21    2.45
   2  16  -2   23.50    2.32
  -2  16   2   21.71    2.89
   1 -16  -2   48.41    4.74
  -1 -16   2   49.55    4.88
  -1 -16   2   47.82    4.57
  -1 -16   2   47.44    4.71
  -1 -16   2   64.05    5.86
   1 -16  -2   55.43    4.91
   1  16  -2   50.03    4.62
   1  16  -2   45.26    4.83
  -1  16   2   50.58    5.54
   0 -16  -2   84.24    7.98
   0 -16  -2   88.37    7.79
   0 -16   2   86.71    7.93
   0 -16   2   86.18    8.29
   0 -16  -2   83.94    8.32
   0  16   2   96.40    7.86
   0  16   2   83.89    9.29
   0  16  -2   83.82    8.29
   0  16  -2   81.23    9.16
   0  16  -2   90.24    7.88
   1 -16   2    5.78    1.15
  -1 -16  -2    7.43    0.78
  -1 -16  -2    7.59    0.96
  -1 -16  -2    6.86    0.79
   1 -16   2    6.20    0.82
  -1 -16  -2    6.58    0.86
  -1  16  -2    8.20    0.91
  -1  16  -2    8.33    1.04
  -1  16  -2    6.39    0.99
   1  16   2    7.61    0.82
   1  16   2    5.59    1.10
  -2 -16  -2   58.49    6.11
  -2 -16  -2   64.97    6.05
   2 -16   2   62.34    5.78
  -2 -16  -2   59.25    5.91
  -2 -16  -2   67.44    5.74
   2 -16   2   58.43    7.05
   2  16   2   59.92    5.74
  -2  16  -2   64.62    5.83
  -2  16  -2   60.70    6.08
   2  16   2   70.12    6.94
  -2  16  -2   65.14    6.82
  -3 -16  -2   10.09    1.53
  -3 -16  -2    9.39    1.08
   3 -16   2   13.08    1.66
  -3 -16  -2   10.00    1.12
  -3 -16  -2    9.84    1.35
  -3  16  -2    9.92    1.53
   3  16   2   12.82    1.64
   3  16   2    8.86    1.10
  -4 -16  -2    8.68    1.04
  -4 -16  -2   10.72    1.72
   4 -16   2   10.99    1.49
  -4 -16  -2    8.83    1.32
   4 -16   2    8.03    0.95
  -4 -16  -2    7.19    0.93
   4  16   2    7.85    1.05
   4  16   2   10.10    1.45
  -4  16  -2    7.61    0.88
  -4  16  -2   10.22    1.60
  -5 -16  -2   36.70    3.66
  -5 -16  -2   35.73    3.78
  -5 -16  -2   37.66    3.45
   5 -16   2   39.04    4.53
  -5  16  -2   43.04    4.67
  -5  16  -2   40.15    3.70
  -5  16  -2   38.97    3.90
  -5  16  -2   38.05    3.70
  -6 -16  -2   45.16    3.85
  -6 -16  -2   35.29    3.70
  -6 -16  -2   37.45    3.45
  -6  16  -2   42.50    3.73
  -6  16  -2   36.43    4.61
  -6  16  -2   36.01    3.71
  -6  16  -2   35.27    3.90
  -7 -16  -2    1.66    0.30
  -7 -16  -2    2.00    0.46
  -7 -16  -2    1.89    0.32
  -7  16  -2    1.21    0.37
  -7  16  -2    2.33    0.46
  -7  16  -2    1.17    0.40
  -7  16  -2    2.02    0.29
  -7  16  -2    1.98    0.41
  -7  16  -2    1.28    0.36
  -8 -16  -2    2.39    0.36
  -8  16  -2    2.67    0.44
  -8  16  -2    2.38    0.35
  -8  16  -2    2.84    0.53
  -8  16  -2    1.51    0.43
  -8  16  -2    2.52    0.49
  -8  16  -2    1.91    0.46
  -9  16  -2    2.55    0.52
  -9  16  -2    1.57    0.43
  -9  16  -2    2.23    0.31
  -9  16  -2    1.49    0.43
  -9  17   2    0.11    0.19
  -9  17   2    0.17    0.42
  -9  17   2   -0.29    0.30
  -8 -17   2    1.89    0.33
  -8  17   2    1.47    0.44
  -8  17   2    2.12    0.31
  -8  17   2    0.59    0.58
  -8  17   2    2.28    0.50
  -8  17   2    1.75    0.44
  -8  17   2    2.12    0.72
  -7 -17   2    0.23    0.55
  -7 -17   2    0.52    0.21
  -7 -17   2    0.07    0.15
  -7 -17   2    0.38    0.21
  -7  17   2    1.74    0.53
  -7  17   2   -0.20    0.30
  -7  17   2    1.66    0.48
  -7  17   2    0.68    0.33
  -7  17   2    0.49    0.36
  -7  17   2    0.17    0.16
  -6 -17   2    0.16    0.41
  -6 -17   2   -0.26    0.45
  -6 -17   2    0.19    0.25
  -6 -17   2    0.14    0.17
   6 -17  -2    0.20    0.56
  -6  17   2    0.36    0.40
  -6  17   2    0.37    0.26
  -6  17   2    0.57    1.41
  -6  17   2    0.00    0.28
  -5 -17   2    3.08    0.66
  -5 -17   2    4.19    0.42
  -5 -17   2    3.23    0.50
   5 -17  -2    3.09    0.59
   5 -17  -2    3.66    0.88
  -5 -17   2    3.41    0.63
  -5  17   2    3.61    0.51
  -5  17   2    3.60    0.49
  -5  17   2    3.21    1.32
  -5  17   2    2.33    0.56
  -4 -17   2   22.63    2.41
   4 -17  -2   21.29    2.30
  -4 -17   2   24.45    2.26
  -4 -17   2   25.00    2.24
   4 -17  -2   17.80    2.29
   4 -17  -2   24.92    2.85
  -4  17   2   22.48    2.20
  -4  17   2   24.15    3.04
   4  17  -2   23.58    2.23
  -4  17   2   20.28    2.28
  -3 -17   2   12.57    1.60
  -3 -17   2   10.97    1.44
   3 -17  -2   11.97    1.48
  -3 -17   2   12.14    1.28
   3 -17  -2   14.20    1.77
   3 -17  -2   11.61    1.38
  -3 -17   2   14.35    1.31
   3  17  -2   12.78    1.30
  -3  17   2   11.85    1.31
  -3  17   2   11.80    1.89
   2 -17  -2   45.60    5.32
  -2 -17   2   50.52    4.62
   2 -17  -2   44.00    4.44
  -2 -17   2   47.19    4.29
  -2 -17   2   47.82    4.51
   2 -17  -2   45.07    4.57
  -2  17   2   46.49    5.24
   2  17  -2   44.11    4.30
   2  17  -2   47.85    4.51
  -1 -17   2   33.41    3.18
  -1 -17   2   41.19    4.14
  -1 -17   2   31.37    3.30
   1 -17  -2   31.76    3.33
  -1 -17   2   34.83    3.41
   1 -17  -2   37.06    3.43
  -1  17   2   37.46    3.95
   1  17  -2   33.28    3.23
   1  17  -2   32.67    3.36
   0 -17  -2    5.55    0.72
   0 -17  -2    5.01    0.62
   0 -17   2    3.89    0.99
   0 -17  -2    6.78    0.85
   0 -17   2    4.82    0.69
   0 -17   2    5.46    0.66
   0  17  -2    5.49    0.77
   0  17   2    4.46    0.92
   0  17  -2    5.00    0.66
   0  17   2    5.05    0.71
   0  17  -2    4.55    0.76
   1 -17   2   40.40    3.81
  -1 -17  -2   38.32    3.76
   1 -17   2   39.01    3.68
  -1 -17  -2   37.40    3.80
  -1 -17  -2   38.47    3.86
  -1 -17  -2   39.73    3.62
   1 -17   2   33.02    4.53
   1  17   2   40.41    3.66
  -1  17  -2   38.75    4.29
  -1  17  -2   40.43    3.88
  -1  17  -2   44.96    3.83
   1  17   2   38.63    4.41
  -2 -17  -2   36.39    3.45
  -2 -17  -2   34.68    3.47
   2 -17   2   34.91    3.32
   2 -17   2   36.51    3.44
  -2 -17  -2   35.80    3.53
  -2 -17  -2   38.53    3.31
   2 -17   2   30.38    4.10
  -2  17  -2   35.16    3.95
  -2  17  -2   32.50    3.47
  -2  17  -2   36.28    3.39
   2  17   2   33.23    3.31
   2  17   2   36.78    4.07
  -3 -17  -2    2.13    0.38
  -3 -17  -2    1.70    0.74
  -3 -17  -2    2.56    0.64
   3 -17   2    2.79    0.74
  -3 -17  -2    2.31    0.48
  -3  17  -2    1.76    0.66
   3  17   2    3.82    0.87
   3  17   2    2.14    0.46
  -4 -17  -2    6.82    0.84
   4 -17   2    8.91    1.36
  -4 -17  -2    6.90    1.43
  -4 -17  -2    7.33    0.94
  -4 -17  -2    8.49    1.23
   4  17   2    7.97    1.32
  -4  17  -2    6.59    0.79
  -4  17  -2    7.00    1.36
  -5 -17  -2   23.80    2.46
   5 -17   2   23.81    3.07
  -5 -17  -2   24.92    2.25
  -5 -17  -2   23.40    2.50
  -5  17  -2   26.46    2.59
  -5  17  -2   24.71    3.22
  -5  17  -2   25.23    2.43
  -5  17  -2   24.15    2.44
   6 -17   2    0.99    0.61
  -6 -17  -2    0.81    0.48
  -6 -17  -2    1.69    0.41
  -6 -17  -2    0.65    0.21
  -6  17  -2    0.63    0.29
  -6  17  -2    1.32    0.33
  -6  17  -2    0.90    0.85
  -6  17  -2    1.32    0.37
  -7 -17  -2   11.24    1.18
  -7 -17  -2   10.61    1.10
  -7 -17  -2   12.79    1.16
  -7 -17  -2   13.75    1.41
  -7  17  -2   13.83    1.16
  -7  17  -2   12.05    1.38
  -7  17  -2   12.16    1.31
  -7  17  -2   12.59    1.33
  -7  17  -2   12.03    1.31
  -7  17  -2   14.98    1.46
  -8 -17  -2    1.60    0.30
  -8  17  -2    1.93    0.42
  -8  17  -2    1.72    0.30
  -8  17  -2    1.69    0.47
  -8  17  -2    1.27    0.41
  -8  17  -2    1.60    0.44
  -8  17  -2    1.13    0.35
  -9  17  -2    4.10    0.48
  -9  17  -2    4.70    0.70
  -9  17  -2    4.50    0.62
  -9  17  -2    4.25    0.63
  -9  18   2    1.95    0.31
  -9  18   2    1.40    0.40
  -9  18   2    1.46    0.50
  -8 -18   2    0.06    0.21
  -8  18   2   -0.49    0.49
  -8  18   2    0.17    0.35
  -8  18   2   -0.10    0.17
  -8  18   2   -0.12    0.38
  -8  18   2   -0.13    0.52
  -7 -18   2    0.40    0.22
  -7 -18   2    0.41    0.16
  -7 -18   2    0.61    0.22
  -7  18   2    0.44    0.34
  -7  18   2    0.63    0.20
  -7  18   2    1.24    0.41
  -7  18   2    0.44    0.46
  -7  18   2   -0.37    0.38
  -7  18   2    0.48    0.32
  -6 -18   2    4.64    0.84
  -6 -18   2    6.22    1.02
  -6 -18   2    6.05    0.62
   6 -18  -2    4.26    1.14
  -6  18   2    6.15    1.97
  -6  18   2    5.82    0.75
  -6  18   2    7.28    0.79
  -6  18   2    4.56    0.87
   5 -18  -2    0.26    0.59
  -5 -18   2    0.66    0.25
  -5 -18   2    0.52    0.18
  -5 -18   2    0.76    0.41
  -5 -18   2   -0.56    0.36
  -5  18   2    0.69    0.25
  -5  18   2    0.69    0.30
  -5  18   2    0.53    0.36
  -5  18   2    0.76    1.12
  -4 -18   2   23.15    2.52
  -4 -18   2   24.68    2.38
   4 -18  -2   23.13    2.96
  -4 -18   2   24.87    2.36
  -4 -18   2   27.50    2.17
   4 -18  -2   22.06    2.44
  -4  18   2   21.42    2.32
  -4  18   2   27.12    3.23
  -4  18   2   21.57    2.49
  -4  18   2   23.88    2.00
   3 -18  -2    0.41    0.51
  -3 -18   2    0.31    0.38
   3 -18  -2   -0.08    0.40
  -3 -18   2    0.26    0.28
   3 -18  -2    0.51    0.31
  -3 -18   2    0.65    0.50
   3  18  -2    0.60    0.29
  -3  18   2    0.38    0.71
   2 -18  -2   76.22    7.94
  -2 -18   2   83.91    8.01
  -2 -18   2   92.86    8.33
  -2 -18   2   87.01    7.77
   2 -18  -2   87.99    8.29
   2 -18  -2   84.25    9.53
  -2  18   2   93.74    9.38
   2  18  -2   90.44    8.23
   2  18  -2   74.95    7.78
   1 -18  -2    0.45    0.38
  -1 -18   2    0.11    0.54
  -1 -18   2    0.39    0.24
  -1 -18   2    0.40    0.33
   1 -18  -2    0.30    0.29
  -1 -18   2    0.87    0.29
   1  18  -2    0.45    0.21
  -1  18   2    1.05    0.56
   1  18  -2   -0.27    0.25
   0 -18   2   16.53    2.54
   0 -18  -2   19.02    2.06
   0 -18   2   18.31    2.00
   0 -18  -2   19.66    2.07
   0 -18   2   20.58    2.04
   0  18  -2   20.81    2.05
   0  18  -2   21.67    2.05
   0  18  -2   19.16    2.30
   0  18   2   22.67    2.03
   0  18   2   22.93    2.48
  -1 -18  -2    0.66    0.24
  -1 -18  -2    0.62    0.40
  -1 -18  -2    0.90    0.34
   1 -18   2    0.56    0.59
   1 -18   2    0.79    0.32
   1 -18   2    0.94    0.27
  -1 -18  -2    0.85    0.29
  -1  18  -2    0.88    0.50
  -1  18  -2    0.93    0.43
   1  18   2    0.63    0.32
   1  18   2    0.71    0.53
  -1  18  -2    1.09    0.36
   2 -18   2    0.69    0.54
   2 -18   2   -0.04    0.18
  -2 -18  -2    0.04    0.18
   2 -18   2    0.03    0.25
  -2 -18  -2   -0.57    0.22
  -2 -18  -2    0.08    0.27
  -2 -18  -2    0.24    0.39
   2  18   2    0.03    0.27
  -2  18  -2   -0.24    0.22
  -2  18  -2   -0.31    0.34
  -2  18  -2   -0.15    0.38
   2  18   2    0.13    0.54
  -3 -18  -2    1.18    0.30
  -3 -18  -2    0.88    0.38
   3 -18   2    0.54    0.57
  -3 -18  -2    1.93    0.74
  -3 -18  -2    0.86    0.50
  -3  18  -2    0.97    0.57
   3  18   2    1.53    0.43
   3  18   2    2.01    0.71
  -4 -18  -2    7.93    0.98
  -4 -18  -2    8.28    0.73
  -4 -18  -2    8.30    1.27
   4 -18   2    7.39    1.32
  -4 -18  -2    5.73    0.85
  -4  18  -2    6.37    0.65
  -4  18  -2    8.05    1.43
  -4  18  -2    6.91    0.85
  -4  18  -2    7.82    0.89
  -5 -18  -2    3.40    0.38
  -5 -18  -2    2.20    0.47
   5 -18   2    2.36    0.78
  -5 -18  -2    2.39    0.59
  -5  18  -2    2.24    0.41
  -5  18  -2    2.37    1.07
  -5  18  -2    2.49    0.48
  -5  18  -2    2.24    0.43
  -6 -18  -2    0.62    0.34
   6 -18   2    0.37    0.59
  -6 -18  -2    0.57    0.20
  -6 -18  -2   -0.10    0.43
  -6  18  -2    0.07    0.25
  -6  18  -2    0.19    0.81
  -6  18  -2   -0.02    0.26
  -6  18  -2    0.54    0.29
  -7 -18  -2    1.36    0.31
  -7 -18  -2    2.61    0.36
  -7 -18  -2    1.89    0.45
  -7 -18  -2    1.82    0.23
  -7  18  -2    2.53    0.51
  -7  18  -2    1.78    0.43
  -7  18  -2    2.12    0.31
  -7  18  -2    1.43    0.40
  -7  18  -2    1.45    0.39
  -7  18  -2    2.56    0.43
  -8 -18  -2    0.98    0.28
  -8 -18  -2    0.98    0.28
  -8  18  -2    1.63    0.29
  -8  18  -2    1.06    0.37
  -8  18  -2    1.37    0.39
  -8  18  -2    1.66    0.48
   9 -18   2    0.23    0.24
  -9  18  -2    0.74    0.44
  -9  18  -2    0.32    0.31
  -9  18  -2    0.21    0.33
  -9  18  -2   -0.07    0.18
  -9  19   2    3.11    0.53
  -9  19   2    3.61    0.44
  -9  19   2    3.89    0.65
  -8 -19   2    1.64    0.31
  -8 -19   2    1.75    0.30
  -8  19   2    1.46    0.27
  -8  19   2    0.19    0.54
  -8  19   2    1.55    0.42
  -8  19   2    1.53    0.48
  -8  19   2    0.67    0.53
  -7 -19   2    1.83    0.32
  -7 -19   2    2.03    0.26
  -7 -19   2    1.77    0.31
  -7 -19   2    1.80    0.63
  -7 -19   2    2.32    0.50
  -7  19   2    2.08    0.50
  -7  19   2    1.55    0.28
  -7  19   2    2.28    0.48
  -7  19   2    1.35    0.42
  -7  19   2    1.17    0.53
  -7  19   2    0.79    0.52
  -6 -19   2   23.12    2.31
  -6 -19   2   20.62    1.90
  -6  19   2   19.48    2.07
  -6  19   2   21.91    2.09
  -6  19   2   17.93    2.28
   5 -19  -2   12.95    1.96
  -5 -19   2   16.50    1.64
  -5 -19   2   12.81    1.48
  -5 -19   2   14.13    1.27
  -5  19   2   13.16    1.40
  -5  19   2   13.45    1.41
  -5  19   2   11.52    1.56
  -5  19   2   13.62    2.55
  -4 -19   2    7.81    1.01
   4 -19  -2    6.83    0.98
  -4 -19   2    7.06    1.05
  -4 -19   2    8.59    0.78
   4 -19  -2    7.77    1.36
  -4  19   2    6.81    0.98
  -4  19   2    8.36    0.74
  -4  19   2    9.54    1.77
  -4  19   2    7.26    0.90
  -3 -19   2    5.84    1.04
  -3 -19   2    6.45    0.81
  -3 -19   2    5.38    0.87
   3 -19  -2    5.80    0.79
   3 -19  -2    5.57    0.90
   3 -19  -2    6.65    1.18
  -3  19   2    4.65    1.18
   3  19  -2    5.49    0.79
  -2 -19   2    2.12    0.59
   2 -19  -2    2.48    0.47
   2 -19  -2    2.10    0.56
  -2 -19   2    3.03    0.48
  -2 -19   2    1.77    0.47
   2  19  -2    3.39    0.51
   2  19  -2    2.28    0.39
  -2  19   2    1.65    0.69
   1 -19  -2   13.40    1.55
  -1 -19   2   14.77    1.52
   1 -19  -2   15.43    1.53
  -1 -19   2   14.20    1.40
  -1 -19   2   13.22    1.52
  -1  19   2   15.50    1.90
   1  19  -2   12.73    1.45
   1  19  -2   13.28    1.46
   0 -19  -2   14.07    1.52
   0 -19  -2   12.95    1.54
   0 -19   2   13.15    1.97
   0 -19   2   12.49    1.47
   0 -19   2   15.22    1.49
   0  19   2   14.10    1.88
   0  19   2   15.91    1.52
   0  19  -2   13.06    1.69
   0  19  -2   13.77    1.49
   0  19  -2   13.57    1.53
   0  19   2   15.81    1.53
  -1 -19  -2   30.58    3.27
  -1 -19  -2   30.06    3.27
   1 -19   2   28.81    3.96
  -1 -19  -2   32.41    3.34
  -1 -19  -2   34.96    3.13
   1 -19   2   30.83    3.19
   1 -19   2   34.09    3.29
  -1  19  -2   37.13    3.40
  -1  19  -2   43.82    3.43
   1  19   2   35.49    3.20
   1  19   2   33.82    3.84
  -1  19  -2   34.25    3.74
   2 -19   2    2.37    0.40
   2 -19   2    2.08    0.75
   2 -19   2    2.26    0.47
  -2 -19  -2    2.17    0.38
  -2 -19  -2    1.96    0.46
  -2 -19  -2    1.44    0.53
  -2 -19  -2    2.28    0.47
  -2  19  -2    2.63    0.47
   2  19   2    1.97    0.72
  -2  19  -2    2.23    0.57
   2  19   2    1.32    0.44
  -2  19  -2    2.38    0.64
   3 -19   2   23.80    2.89
  -3 -19  -2   20.75    2.51
  -3 -19  -2   25.13    2.26
  -3 -19  -2   21.51    2.44
  -3 -19  -2   23.14    2.28
   3  19   2   24.08    2.80
  -3  19  -2   23.50    2.78
   3  19   2   18.89    2.21
   4 -19   2   20.76    2.88
  -4 -19  -2   23.62    2.64
  -4 -19  -2   23.55    2.32
  -4 -19  -2   21.40    2.32
  -4 -19  -2   24.97    2.10
  -4  19  -2   24.44    2.99
  -4  19  -2   21.87    1.91
  -4  19  -2   23.06    2.38
  -4  19  -2   22.41    2.28
  -5 -19  -2    0.12    0.17
   5 -19   2    0.10    0.54
  -5 -19  -2    0.15    0.39
  -5 -19  -2    0.56    0.31
  -5  19  -2   -0.05    0.81
  -5  19  -2    0.28    0.25
  -5  19  -2    0.50    0.30
  -5  19  -2    0.90    0.30
  -6 -19  -2   13.95    1.48
  -6 -19  -2   12.78    1.27
  -6  19  -2   12.61    1.40
  -6  19  -2   12.85    1.48
  -6  19  -2   14.49    1.42
  -7 -19  -2    2.32    0.49
  -7 -19  -2    3.03    0.39
  -7 -19  -2    2.41    0.38
  -7 -19  -2    2.19    0.28
  -7  19  -2    2.77    0.50
  -7  19  -2    3.37    0.50
  -7  19  -2    2.52    0.35
  -7  19  -2    3.19    0.58
  -7  19  -2    2.26    0.47
  -7  19  -2    2.29    0.47
  -8 -19  -2    2.08    0.37
  -8 -19  -2    2.22    0.36
  -8  19  -2    2.62    0.56
  -8  19  -2    2.77    0.49
  -8  19  -2    2.74    0.48
  -8  19  -2    2.99    0.39
   9 -19   2    0.10    0.22
  -9  19  -2    0.10    0.44
  -9  19  -2    0.32    0.19
  -9  19  -2   -0.02    0.27
  -9  19  -2    0.20    0.33
  -9  20   2    4.37    0.51
  -8 -20   2    0.59    0.23
  -8 -20   2    0.79    0.23
  -8  20   2   -0.56    0.45
  -8  20   2    0.31    0.36
  -8  20   2    0.62    0.22
  -8  20   2    0.12    0.46
  -8  20   2    0.67    0.44
  -7 -20   2    0.11    0.52
  -7 -20   2    0.25    0.36
  -7 -20   2   -0.06    0.14
  -7 -20   2    0.39    0.23
  -7 -20   2    0.32    0.22
  -7  20   2    0.30    0.34
  -7  20   2   -0.26    0.41
  -7  20   2    0.42    0.20
  -7  20   2   -0.16    0.40
  -7  20   2    0.12    0.39
  -7  20   2    0.15    0.30
  -6 -20   2    7.03    0.73
  -6 -20   2    7.25    1.08
  -6 -20   2    7.71    0.90
  -6 -20   2    6.38    0.70
  -6 -20   2    6.62    0.74
  -6  20   2    6.44    1.04
  -6  20   2    7.01    0.88
  -6  20   2    7.58    0.74
   6  20  -2    9.99    1.01
  -6  20   2    5.45    0.99
  -6  20   2    8.43    0.91
   5 -20  -2   13.31    1.79
  -5 -20   2    9.84    1.25
  -5 -20   2   10.56    0.98
  -5 -20   2   10.83    1.36
  -5  20   2    8.99    2.06
  -5  20   2    8.09    1.24
  -5  20   2    9.89    1.12
  -5  20   2    9.75    1.09
  -4 -20   2    8.87    0.81
  -4 -20   2    7.09    1.08
   4 -20  -2    8.12    1.42
   4 -20  -2    6.74    0.99
  -4 -20   2    9.20    1.08
  -4  20   2    8.23    1.75
  -4  20   2    8.82    0.95
  -4  20   2    8.09    1.04
  -4  20   2    7.72    0.76
   3 -20  -2    6.40    0.90
  -3 -20   2    6.67    0.98
  -3 -20   2    7.37    0.91
   3 -20  -2    6.16    1.19
  -3  20   2    7.79    1.50
   3  20  -2    7.50    0.87
  -3  20   2    6.49    0.85
  -2 -20   2   -0.02    0.28
  -2 -20   2    0.75    0.45
  -2 -20   2   -0.04    0.24
   2 -20  -2    0.10    0.29
   2 -20  -2    0.45    0.41
   2  20  -2   -0.25    0.27
  -2  20   2    0.24    0.59
   2  20  -2    0.39    0.22
   1 -20  -2    0.17    0.30
  -1 -20   2    0.98    0.43
  -1 -20   2    0.66    0.29
   1 -20  -2    0.48    0.40
   1  20  -2    0.49    0.25
  -1  20   2    0.98    0.59
   1  20  -2    0.89    0.38
   0 -20   2   18.22    2.15
   0 -20   2   20.03    2.71
   0 -20   2   21.81    2.19
   0 -20  -2   21.30    2.24
   0 -20  -2   21.34    2.23
   0  20   2   24.35    2.22
   0  20  -2   20.47    2.48
   0  20   2   23.09    2.21
   0  20   2   22.06    2.65
   0  20  -2   22.71    2.22
   0  20  -2   21.94    2.22
  -1 -20  -2    9.02    1.13
  -1 -20  -2    7.79    1.20
   1 -20   2    8.56    1.54
  -1 -20  -2    8.68    1.06
   1 -20   2    9.38    1.12
  -1 -20  -2   11.04    1.08
   1 -20   2   10.96    1.10
  -1  20  -2    9.92    1.32
  -1  20  -2   10.64    1.33
   1  20   2    9.21    1.49
   1  20   2   11.21    1.23
  -1  20  -2   10.49    1.19
  -2 -20  -2    2.32    0.49
  -2 -20  -2    2.20    0.53
   2 -20   2    3.33    0.87
  -2 -20  -2    2.75    0.45
  -2 -20  -2    2.10    0.61
   2 -20   2    3.12    0.46
  -2  20  -2    2.31    0.72
  -2  20  -2    3.28    0.54
  -2  20  -2    2.64    0.66
   2  20   2    3.66    0.84
   2  20   2    2.20    0.51
   3 -20   2   -0.05    0.58
  -3 -20  -2    0.93    0.37
  -3 -20  -2   -0.08    0.39
  -3 -20  -2    0.64    0.27
  -3  20  -2    0.78    0.60
   3  20   2    0.35    0.59
   4 -20   2    7.90    1.42
  -4 -20  -2    7.27    1.02
  -4 -20  -2    8.25    0.78
  -4 -20  -2    6.33    0.91
  -4 -20  -2    9.51    1.32
  -4  20  -2    8.47    0.95
  -4  20  -2    7.49    0.93
  -4  20  -2    9.17    1.57
  -4  20  -2    7.17    0.70
  -5 -20  -2   37.68    3.69
  -5 -20  -2   37.49    3.78
  -5 -20  -2   37.77    3.43
   5 -20   2   33.77    4.51
  -5  20  -2   38.27    3.71
  -5  20  -2   40.73    3.90
  -5  20  -2   39.26    4.64
  -6 -20  -2    0.41    0.21
  -6 -20  -2   -0.13    0.11
  -6 -20  -2    0.08    0.23
  -6 -20  -2    0.44    0.32
  -6  20  -2    0.00    0.18
  -6  20  -2    0.32    0.28
  -6  20  -2    0.37    0.32
  -6  20  -2   -0.16    0.28
  -6  20  -2    0.19    0.31
  -6  20  -2    0.94    0.41
  -7 -20  -2    0.58    0.34
  -7 -20  -2    0.06    0.24
  -7 -20  -2    0.66    0.14
  -7 -20  -2    0.52    0.25
  -7  20  -2    0.43    0.21
  -7  20  -2    0.30    0.33
  -7  20  -2    0.89    0.36
  -7  20  -2    0.57    0.44
  -7  20  -2    1.01    0.36
  -8 -20  -2    0.05    0.21
  -8 -20  -2   -0.20    0.21
  -8  20  -2   -0.03    0.20
  -8  20  -2    0.08    0.31
  -8  20  -2   -0.04    0.28
  -8  20  -2    0.69    0.45
  -8 -21   2    8.09    0.82
  -8 -21   2    8.38    0.80
  -8  21   2    9.69    0.98
  -8  21   2    8.18    1.04
  -8  21   2    8.84    0.82
  -8  21   2    5.51    1.02
  -8  21   2    5.76    0.98
  -7 -21   2   20.08    1.91
  -7 -21   2   19.63    1.72
  -7 -21   2   20.37    1.78
  -7 -21   2   19.51    1.70
  -7  21   2   16.90    2.11
  -7  21   2   19.45    2.10
  -7  21   2   15.47    1.98
  -7  21   2   20.64    1.75
  -7  21   2   14.64    1.93
  -7  21   2   21.19    1.97
  -6 -21   2   13.61    1.43
  -6 -21   2    8.68    0.95
  -6 -21   2    8.72    0.91
  -6 -21   2    9.42    1.10
  -6 -21   2   10.03    0.94
   6  21  -2   12.36    1.21
  -6  21   2   10.98    1.12
  -6  21   2    6.75    1.16
  -6  21   2   11.03    0.96
  -6  21   2   10.29    1.10
  -6  21   2    6.37    1.20
  -5 -21   2    4.03    0.72
  -5 -21   2    1.28    0.51
  -5 -21   2    2.74    0.35
   5 -21  -2    1.83    0.73
  -5  21   2    2.07    0.42
  -5  21   2    2.18    0.52
  -5  21   2    1.60    1.24
   5  21  -2    1.59    0.44
  -4 -21   2    8.29    1.20
  -4 -21   2   10.02    0.92
  -4 -21   2   11.30    1.24
   4 -21  -2    9.34    1.11
   4 -21  -2    8.87    1.51
  -4  21   2    8.94    1.80
  -4  21   2    8.50    1.03
  -4  21   2    8.62    0.87
   4  21  -2   11.93    1.13
  -4  21   2    8.83    1.13
  -3 -21   2    3.21    0.64
  -3 -21   2    3.57    0.59
  -3 -21   2    3.74    0.38
   3 -21  -2    1.80    0.49
  -3  21   2    1.72    0.90
   3  21  -2    2.48    0.46
  -3  21   2    3.82    0.37
  -3  21   2    2.13    0.46
  -2 -21   2    2.61    0.47
   2 -21  -2    2.38    0.47
  -2 -21   2    1.88    0.51
   2 -21  -2    1.14    0.54
  -2  21   2    2.30    0.85
   2  21  -2    2.80    0.45
  -1 -21   2    0.87    0.44
   1 -21  -2    1.32    0.39
   1 -21  -2    0.96    0.47
  -1 -21   2    1.14    0.34
   1  21  -2    0.60    0.37
  -1  21   2    1.39    0.69
   1  21  -2    0.89    0.29
   0 -21   2   48.44    5.41
   0 -21  -2   46.09    4.61
   0 -21   2   41.99    4.42
   0 -21   2   49.31    4.58
   0 -21  -2   42.34    4.48
   0  21  -2   50.55    4.47
   0  21   2   47.20    5.25
   0  21  -2   47.64    4.60
   1 -21   2   10.55    1.41
  -1 -21  -2   12.85    1.49
  -1 -21  -2   12.68    1.52
   1 -21   2    9.96    1.89
  -1 -21  -2   13.70    1.39
   1 -21   2   14.50    1.43
   1  21   2   15.66    1.51
   1  21   2   14.37    1.93
  -1  21  -2   15.48    1.63
  -1  21  -2   12.91    1.71
  -1  21  -2   15.13    1.53
  -2 -21  -2    3.40    0.56
  -2 -21  -2    5.21    0.75
  -2 -21  -2    4.36    0.65
   2 -21   2    4.61    0.59
  -2 -21  -2    3.89    0.79
   2 -21   2    4.38    1.02
  -2  21  -2    3.99    0.63
   2  21   2    4.65    0.99
   2  21   2    4.03    0.68
  -2  21  -2    3.67    0.84
  -3 -21  -2   14.77    1.53
  -3 -21  -2   13.78    1.50
  -3 -21  -2   14.49    1.69
   3 -21   2   13.56    2.09
   3 -21   2   12.85    1.50
  -3 -21  -2   15.66    1.33
  -3  21  -2   13.80    1.50
  -3  21  -2   14.25    2.05
  -3  21  -2   13.34    1.23
   3  21   2   15.46    1.98
  -4 -21  -2   14.51    1.63
  -4 -21  -2   17.06    1.46
   4 -21   2   17.25    2.34
  -4 -21  -2   16.42    1.70
  -4 -21  -2   13.80    1.92
  -4  21  -2   16.18    2.34
  -4  21  -2   13.78    1.32
  -4  21  -2   16.58    1.68
  -5 -21  -2    0.23    0.29
   5 -21   2   -0.07    0.55
  -5 -21  -2    0.33    0.19
  -5 -21  -2    0.15    0.42
  -5  21  -2    0.22    0.26
  -5  21  -2    0.64    0.32
  -5  21  -2    0.75    0.89
  -6 -21  -2   -0.12    0.19
  -6 -21  -2   -0.09    0.12
  -6 -21  -2   -0.20    0.27
  -6 -21  -2    0.18    0.23
  -6  21  -2   -0.02    0.40
  -6  21  -2    0.43    0.33
  -6  21  -2    0.03    0.18
  -6  21  -2    0.11    0.27
  -7 -21  -2    0.74    0.17
  -7 -21  -2    1.20    0.29
  -7 -21  -2    1.06    0.37
  -7 -21  -2    1.63    0.31
  -7  21  -2    1.15    0.49
  -7  21  -2    1.34    0.39
  -7  21  -2    1.54    0.39
  -7  21  -2    0.44    0.36
  -7  21  -2    1.17    0.26
  -8 -21  -2    0.44    0.22
   8 -21   2    0.09    0.26
  -8 -21  -2    0.26    0.22
  -8  21  -2    0.00    0.28
  -8  21  -2    0.15    0.46
  -8  21  -2   -0.01    0.29
  -8  21  -2    0.02    0.21
  -8 -22   2    2.23    0.33
  -8 -22   2    2.40    0.34
  -8  22   2    1.64    0.56
  -8  22   2    3.04    0.49
  -8  22   2    1.74    0.56
  -8  22   2    0.79    0.49
  -8  22   2    1.73    0.32
  -7 -22   2    2.01    0.27
  -7 -22   2    2.63    0.35
  -7 -22   2    2.47    0.48
  -7 -22   2    1.90    0.34
  -7  22   2    1.43    0.43
  -7  22   2    2.21    0.59
  -7  22   2    1.82    0.55
  -7  22   2    2.34    0.55
  -7  22   2    1.67    0.44
  -7  22   2    1.35    0.30
  -6 -22   2    0.69    0.37
  -6 -22   2    0.96    0.25
  -6 -22   2    0.80    0.51
  -6 -22   2    0.75    0.23
  -6 -22   2    0.27    0.17
  -6  22   2    0.00    0.40
  -6  22   2    0.30    0.33
  -6  22   2    0.55    0.51
   6  22  -2    0.99    0.41
  -5 -22   2   33.29    3.01
  -5 -22   2   26.76    2.81
   5 -22  -2   24.13    3.41
  -5 -22   2   29.91    2.57
  -5  22   2   21.76    2.95
  -5  22   2   27.79    2.78
   5  22  -2   33.01    2.90
  -4 -22   2    0.65    0.45
   4 -22  -2    0.52    0.61
   4 -22  -2    0.33    0.34
  -4 -22   2    0.98    0.21
  -4 -22   2    0.87    0.42
  -4  22   2    0.45    0.21
  -4  22   2    0.11    0.31
  -4  22   2    0.47    0.99
  -4  22   2    0.61    0.32
   4  22  -2    0.90    0.36
  -3 -22   2   18.26    2.20
  -3 -22   2   21.57    1.90
  -3 -22   2   20.56    2.08
   3 -22  -2   19.27    2.16
   3  22  -2   22.65    2.16
  -3  22   2   21.08    1.76
  -3  22   2   20.76    2.20
  -3  22   2   19.75    2.90
  -2 -22   2    1.61    0.21
  -2 -22   2    1.83    0.45
   2 -22  -2    1.30    0.41
  -2 -22   2    1.30    0.40
   2  22  -2    1.59    0.36
  -2  22   2    1.17    0.33
  -2  22   2    1.34    0.77
   1 -22  -2   19.69    2.14
  -1 -22   2   22.66    2.16
  -1 -22   2   17.11    2.13
   1  22  -2   22.21    2.13
  -1  22   2   19.53    2.58
   0 -22   2    8.08    0.91
   0 -22   2    7.07    1.00
   0 -22  -2    6.38    0.94
   0 -22  -2    6.84    1.06
   0  22  -2    8.31    0.99
   0  22  -2    9.41    1.14
   0  22   2    6.45    1.26
  -1 -22  -2    0.35    0.34
   1 -22   2    1.39    0.46
   1 -22   2    0.49    0.70
   1 -22   2    1.13    0.32
  -1  22  -2    1.41    0.55
  -1  22  -2    0.29    0.49
  -1  22  -2    1.36    0.42
   1  22   2    0.52    0.56
   1  22   2    0.63    0.42
   1  22   2    1.50    0.36
   2 -22   2    1.55    0.35
  -2 -22  -2    1.04    0.41
  -2 -22  -2    1.42    0.21
  -2 -22  -2    2.10    0.48
   2 -22   2    2.11    0.82
  -2 -22  -2    1.31    0.35
  -2  22  -2    2.14    0.67
   2  22   2    1.03    0.67
  -3 -22  -2    2.41    0.46
  -3 -22  -2    3.17    0.38
  -3 -22  -2    2.91    0.60
  -3 -22  -2    2.75    0.65
   3 -22   2    2.92    0.91
   3 -22   2    3.16    0.50
  -3  22  -2    2.90    0.46
  -3  22  -2    3.37    0.38
  -3  22  -2    2.93    0.88
   4 -22   2    1.63    0.79
  -4 -22  -2    1.48    0.27
  -4 -22  -2    0.14    0.43
  -4 -22  -2    1.30    0.58
  -4 -22  -2    1.95    0.41
  -4  22  -2    1.55    0.35
  -4  22  -2    0.89    0.21
  -4  22  -2    1.13    0.78
  -5 -22  -2    1.90    0.44
  -5 -22  -2    1.24    0.28
   5 -22   2    0.85    0.67
  -5  22  -2    1.40    0.37
  -6 -22  -2    0.87    0.19
  -6 -22  -2    0.62    0.24
  -6 -22  -2    0.51    0.32
  -6 -22  -2    1.18    0.28
  -6  22  -2    0.87    0.48
  -6  22  -2    1.07    0.37
  -6  22  -2    0.58    0.32
  -7 -22  -2    0.67    0.26
  -7 -22  -2    0.19    0.29
  -7 -22  -2    0.21    0.12
  -7 -22  -2    0.02    0.22
  -7  22  -2    0.01    0.45
  -7  22  -2    0.53    0.32
  -7  22  -2    0.63    0.22
  -7  22  -2    0.49    0.34
   8 -22   2    0.06    0.25
  -8 -22  -2   -0.05    0.22
  -8 -22  -2    0.02    0.21
  -8  22  -2    0.29    0.30
  -8  22  -2   -0.19    0.29
  -8  22  -2    0.07    0.20
  -8  22  -2    0.01    0.48
  -8 -23   2    0.80    0.25
  -8 -23   2    1.15    0.27
  -8  23   2    0.10    0.47
  -8  23   2    0.59    0.45
  -8  23   2    1.13    0.25
  -8  23   2   -0.18    0.45
  -7 -23   2    3.23    0.52
  -7 -23   2    3.40    0.44
  -7 -23   2    3.71    0.36
  -7 -23   2    2.88    0.41
  -7  23   2    1.79    0.60
  -7  23   2    2.09    0.59
  -7  23   2    2.70    0.63
  -7  23   2    2.51    0.40
  -7  23   2    4.35    0.58
  -6 -23   2   36.42    3.35
  -6 -23   2   40.00    3.48
  -6 -23   2   37.80    3.23
  -6 -23   2   32.03    3.25
  -6 -23   2   37.95    3.79
  -6  23   2   35.36    3.89
  -6  23   2   43.18    3.63
  -6  23   2   32.48    3.62
   6  23  -2   39.04    3.72
  -5 -23   2    7.10    0.73
  -5 -23   2    6.82    0.70
  -5 -23   2    7.46    1.06
   5  23  -2    7.85    0.96
  -5  23   2    7.75    1.00
  -5  23   2    6.59    1.00
  -5  23   2    5.93    0.83
  -4 -23   2    6.34    0.96
  -4 -23   2    7.76    1.05
  -4 -23   2    7.73    0.73
   4 -23  -2    5.67    0.88
  -4  23   2    6.74    0.70
   4  23  -2    9.21    0.97
  -4  23   2    7.25    0.86
  -4  23   2    5.66    0.89
  -4  23   2    4.60    1.48
  -3 -23   2   29.37    2.53
  -3 -23   2   26.44    2.88
  -3 -23   2   26.43    2.71
   3 -23  -2   24.88    2.82
  -3  23   2   27.86    3.59
  -3  23   2   29.00    2.34
   3  23  -2   32.80    2.86
  -3  23   2   25.61    2.89
  -2 -23   2    8.05    1.05
  -2 -23   2    7.93    0.69
   2 -23  -2    8.52    1.03
  -2 -23   2    7.78    0.97
  -2  23   2    7.64    0.92
  -2  23   2    8.12    1.48
  -2  23   2    7.30    0.71
   2  23  -2    6.59    0.93
  -1 -23   2    1.08    0.39
   1 -23  -2    1.19    0.43
  -1 -23   2    1.34    0.25
  -1  23   2    1.50    0.75
   1  23  -2    1.60    0.38
  -1  23   2    1.44    0.33
   0 -23   2   13.74    1.46
   0 -23  -2   12.35    1.48
   0  23   2   12.36    1.90
   0  23  -2   14.23    1.50
   1 -23   2   37.01    4.84
  -1 -23  -2   45.84    3.38
   1 -23   2   40.89    4.04
  -1 -23  -2   36.29    4.07
   1  23   2   36.30    4.64
   1  23   2   43.53    4.07
  -1  23  -2   37.61    4.57
  -1  23  -2   44.95    4.12
   2 -23   2   11.59    1.31
  -2 -23  -2   11.62    1.43
   2 -23   2   10.64    1.89
  -2 -23  -2   11.12    1.04
   2 -23   2   13.08    1.33
  -2 -23  -2   12.51    1.14
  -2 -23  -2   13.75    1.35
  -2  23  -2   12.61    1.06
  -2  23  -2   14.70    1.84
   2  23   2   11.59    1.33
   2  23   2   11.27    1.80
  -2  23  -2   11.87    1.29
  -3 -23  -2    2.92    0.52
   3 -23   2    1.77    0.86
  -3 -23  -2    3.67    0.68
   3 -23   2    2.90    0.50
  -3 -23  -2    2.94    0.70
  -3 -23  -2    4.11    0.42
  -3  23  -2    3.02    0.38
  -3  23  -2    2.36    0.87
  -3  23  -2    2.97    0.47
   4 -23   2    7.86    0.97
  -4 -23  -2    6.20    1.05
  -4 -23  -2    8.12    0.98
   4 -23   2    6.67    1.46
  -4 -23  -2    8.65    1.27
  -4 -23  -2    9.50    0.84
  -4  23  -2    6.75    1.54
  -4  23  -2    8.17    0.75
  -4  23  -2    8.13    0.99
   5 -23   2    2.10    0.51
  -5 -23  -2    3.85    0.48
  -5 -23  -2    3.43    0.60
  -5 -23  -2    3.90    0.49
  -5 -23  -2    4.60    0.46
  -5  23  -2    4.13    0.61
  -5  23  -2    3.66    0.60
  -6 -23  -2   28.98    2.98
   6 -23   2   26.03    2.90
  -6 -23  -2   30.41    2.61
  -6 -23  -2   30.24    2.61
  -6 -23  -2   27.19    2.69
  -6  23  -2   32.32    2.86
  -6  23  -2   31.60    3.06
  -6  23  -2   29.93    3.14
  -7 -23  -2    3.83    0.44
  -7 -23  -2    2.45    0.39
   7 -23   2    2.80    0.48
  -7 -23  -2    2.56    0.32
  -7  23  -2    2.75    0.38
  -7  23  -2    2.94    0.51
  -7  23  -2    3.58    0.67
  -7  23  -2    2.91    0.50
  -8 -23  -2    4.11    0.56
  -8 -23  -2    4.90    0.56
   8 -23   2    3.77    0.61
  -8  23  -2    5.43    0.69
  -8  23  -2    6.22    0.68
  -8  23  -2    6.00    0.85
  -8  23  -2    6.31    0.59
  -8 -24   2    0.55    0.23
  -8 -24   2    0.17    0.20
  -8  24   2    0.64    0.23
  -8  24   2   -0.66    0.37
  -8  24   2    0.44    0.47
  -8  24   2   -0.15    0.42
  -7 -24   2    1.77    0.32
  -7 -24   2    1.65    0.31
  -7 -24   2    2.02    0.41
  -7 -24   2    1.72    0.24
  -7  24   2    1.14    0.51
  -7  24   2    1.55    0.30
  -7  24   2    1.69    0.53
  -7  24   2    1.89    0.42
  -6 -24   2    2.11    0.56
  -6 -24   2    1.79    0.32
  -6 -24   2    1.14    0.24
  -6 -24   2    1.93    0.33
  -6 -24   2    1.79    0.41
  -6  24   2    1.06    0.52
  -6  24   2    1.21    0.40
  -6  24   2    0.99    0.55
   6  24  -2    1.97    0.49
  -5 -24   2    4.85    0.54
  -5 -24   2    4.36    0.80
  -5 -24   2    5.40    0.56
  -5 -24   2    4.94    0.67
  -5 -24   2    5.46    0.57
   5  24  -2    4.05    0.71
  -5  24   2    5.19    0.68
  -5  24   2    3.82    0.73
  -5  24   2    3.59    0.74
   4 -24  -2    3.02    0.59
  -4 -24   2    3.24    0.69
  -4 -24   2    4.07    0.75
  -4 -24   2    3.47    0.43
  -4  24   2    3.86    0.65
  -4  24   2    3.12    0.43
   4  24  -2    4.20    0.65
  -4  24   2    2.59    1.27
   3 -24  -2    6.49    0.91
  -3 -24   2    4.63    0.85
  -3 -24   2    6.36    0.68
  -3 -24   2    7.78    1.02
  -3  24   2    7.45    0.67
  -3  24   2    6.91    0.89
   3  24  -2    7.32    0.90
  -3  24   2    6.77    1.55
  -2 -24   2    8.39    1.11
   2 -24  -2    8.29    1.05
  -2 -24   2    7.93    0.72
  -2  24   2    7.17    0.97
  -2  24   2    8.51    0.76
   2  24  -2    8.10    1.02
  -2  24   2    9.19    1.63
   1 -24  -2    4.95    0.42
  -1 -24   2    3.14    0.60
   1 -24  -2    2.72    0.59
  -1 -24   2    2.84    0.38
   1  24  -2    3.14    0.58
  -1  24   2    2.70    0.49
  -1  24   2    3.20    0.96
   0 -24   2   13.02    1.41
   0 -24  -2   12.88    1.45
   0 -24  -2   13.73    1.11
   0  24   2   10.35    1.36
   0  24  -2   13.48    1.49
   0  24   2   13.28    1.92
   1 -24   2   51.58    5.03
  -1 -24  -2   58.70    4.22
  -1 -24  -2   46.55    5.07
   1  24   2   54.49    5.07
  -1  24  -2   48.15    5.67
  -1  24  -2   54.16    5.09
   1  24   2   45.49    5.13
   1  24   2   49.93    5.77
  -2 -24  -2    6.79    0.58
  -2 -24  -2    6.79    0.62
  -2 -24  -2    5.66    0.84
   2 -24   2    6.11    1.30
  -2 -24  -2    4.66    0.86
   2 -24   2    4.81    0.74
   2  24   2    6.24    0.77
  -2  24  -2    4.72    1.09
  -2  24  -2    6.26    0.59
   2  24   2    3.98    1.10
  -2  24  -2    5.93    0.71
   3 -24   2   -0.09    0.67
  -3 -24  -2    0.51    0.19
   3 -24   2    0.52    0.29
  -3 -24  -2    0.13    0.40
  -3 -24  -2    0.79    0.52
  -3 -24  -2   -0.17    0.25
  -3  24  -2    0.37    0.21
  -3  24  -2    0.37    0.24
  -3  24  -2   -0.12    0.62
   4 -24   2   -1.22    0.57
  -4 -24  -2   -0.06    0.49
  -4 -24  -2   -0.18    0.24
   4 -24   2    0.27    0.29
  -4 -24  -2    0.36    0.20
  -4 -24  -2   -0.07    0.45
  -4  24  -2    0.39    0.18
  -4  24  -2    0.29    0.80
  -4  24  -2    0.17    0.26
  -5 -24  -2    0.67    0.20
   5 -24   2    0.58    0.32
  -5 -24  -2    0.26    0.30
  -5 -24  -2    0.34    0.22
  -5 -24  -2    0.99    0.27
  -5  24  -2    1.13    0.38
  -5  24  -2    1.17    0.34
  -6 -24  -2    8.02    0.84
  -6 -24  -2    8.45    0.83
   6 -24   2    7.98    0.96
  -6 -24  -2    7.42    0.77
  -6 -24  -2    8.25    0.99
  -6  24  -2    8.37    0.96
  -6  24  -2    8.30    1.00
  -7 -24  -2    5.98    0.70
  -7 -24  -2    8.18    0.79
  -7 -24  -2    8.12    0.77
   7 -24   2    6.98    0.87
  -7  24  -2    6.58    0.85
  -7  24  -2    7.37    1.03
  -7  24  -2    8.87    0.78
  -7  24  -2    9.18    0.94
  -8 -24  -2    0.39    0.22
   8 -24   2    0.41    0.25
  -8 -24  -2    0.61    0.25
  -8  24  -2    0.89    0.34
  -8  24  -2    0.67    0.29
  -8  24  -2    0.64    0.52
  -8  24  -2    0.31    0.21
  -8  25   2    1.77    0.30
  -8  25   2    0.92    0.47
  -7 -25   2    2.93    0.40
  -7 -25   2    2.61    0.31
  -7 -25   2    2.83    0.47
  -7 -25   2    2.50    0.39
  -7  25   2    3.30    0.61
  -7  25   2    2.15    0.59
  -7  25   2    2.76    0.40
  -6 -25   2    4.91    0.69
  -6 -25   2    5.66    0.85
  -6 -25   2    4.95    0.59
  -6 -25   2    4.88    0.61
  -6 -25   2    6.99    0.66
  -6  25   2    7.22    0.79
  -6  25   2    6.53    0.95
   6  25  -2    7.51    0.90
  -6  25   2    4.14    0.84
  -5 -25   2    1.18    0.24
  -5 -25   2    0.66    0.33
  -5 -25   2    1.62    0.29
  -5 -25   2    1.25    0.27
  -5 -25   2    0.90    0.48
   5  25  -2    0.67    0.41
  -5  25   2    0.34    0.46
  -5  25   2    1.28    0.47
  -5  25   2    0.96    0.38
   4 -25  -2   11.25    1.39
  -4 -25   2   13.32    1.21
  -4 -25   2   13.25    1.49
  -4  25   2   11.95    1.14
  -4  25   2   11.52    1.46
   4  25  -2   14.28    1.47
   3 -25  -2    0.80    0.39
  -3 -25   2    0.80    0.47
  -3 -25   2    0.79    0.47
  -3 -25   2    1.10    0.22
  -3  25   2    0.91    0.24
   3  25  -2    0.79    0.37
  -3  25   2   -0.20    0.84
  -3  25   2    0.54    0.35
  -2 -25   2    9.23    0.75
  -2 -25   2    7.55    1.11
   2 -25  -2    7.42    1.06
  -2  25   2    7.83    1.04
  -2  25   2    7.13    1.59
  -2  25   2    8.81    0.81
   2  25  -2   10.33    1.10
  -1 -25   2   19.49    2.01
   1 -25  -2   17.47    1.99
  -1 -25   2   18.79    1.60
   1 -25  -2   20.43    1.60
   1  25  -2   17.65    1.98
  -1  25   2   15.73    2.52
  -1  25   2   18.28    1.96
   0 -25   2   16.44    1.88
   0 -25  -2   19.06    1.52
   0 -25   2   18.77    1.53
   0 -25  -2   17.29    1.91
   0  25  -2   17.54    1.96
   0  25   2   16.39    1.86
   0  25   2   17.08    2.35
  -1 -25  -2    2.81    0.36
   1 -25   2    4.09    0.41
  -1 -25  -2    3.25    0.62
   1 -25   2    3.61    0.57
   1  25   2    3.13    0.92
  -1  25  -2    3.07    0.61
   1  25   2    3.92    0.68
   1  25   2    2.76    0.49
   2 -25   2   68.11    9.13
  -2 -25  -2   83.72    7.93
   2 -25   2   73.35    7.72
  -2 -25  -2   81.64    6.58
   2  25   2   97.06    7.90
  -2  25  -2   87.02    6.63
  -2  25  -2   76.67    8.81
   2  25   2   75.93    8.84
  -2  25  -2   79.05    8.03
   2  25   2   82.26    8.04
   3 -25   2   17.25    2.88
   3 -25   2   20.20    2.19
  -3 -25  -2   22.89    2.39
  -3 -25  -2   20.37    2.22
  -3 -25  -2   24.33    2.00
  -3  25  -2   23.27    1.85
  -3  25  -2   19.30    2.75
  -3  25  -2   20.25    2.24
  -4 -25  -2    0.54    0.22
  -4 -25  -2    0.26    0.51
   4 -25   2    0.45    0.30
  -4  25  -2    0.34    0.18
  -4  25  -2    0.01    0.26
  -5 -25  -2    0.13    0.17
  -5 -25  -2   -0.27    0.22
   5 -25   2    0.07    0.28
  -5 -25  -2    0.10    0.22
  -5  25  -2    0.30    0.29
  -5  25  -2    0.23    0.33
  -6 -25  -2    0.13    0.15
  -6 -25  -2    0.24    0.25
   6 -25   2    0.21    0.30
  -6 -25  -2    0.09    0.23
  -6  25  -2    0.88    0.34
  -6  25  -2    0.47    0.32
   7 -25   2   -0.10    0.26
  -7 -25  -2    0.21    0.22
  -7 -25  -2    0.35    0.13
  -7 -25  -2   -0.14    0.22
  -7  25  -2   -0.05    0.18
  -7  25  -2    0.70    0.31
  -7  25  -2    0.26    0.32
  -7  25  -2   -0.80    0.49
  -8  25  -2    0.13    0.19
  -7 -26   2   -0.03    0.21
  -7 -26   2    0.02    0.22
  -7 -26   2    0.05    0.12
  -7 -26   2   -0.09    0.26
  -7  26   2   -0.95    0.39
  -7  26   2   -0.40    0.19
  -7  26   2   -0.81    0.37
  -6 -26   2    0.49    0.30
  -6 -26   2    0.43    0.24
  -6 -26   2    0.82    0.26
  -6 -26   2    0.65    0.19
   6  26  -2    0.21    0.38
  -6  26   2    0.47    0.48
  -6  26   2    0.43    0.49
  -5 -26   2   30.58    2.90
  -5 -26   2   32.74    2.74
  -5 -26   2   32.65    2.71
  -5 -26   2   29.17    3.15
  -5 -26   2   31.91    2.81
  -5  26   2   27.07    3.24
   5  26  -2   31.70    3.14
  -5  26   2   27.22    3.03
   4 -26  -2    5.09    0.63
  -4 -26   2    4.21    0.52
  -4 -26   2    5.92    0.69
  -4 -26   2    5.37    0.54
   4 -26  -2    4.35    0.71
  -4 -26   2    4.95    0.54
  -4 -26   2    5.40    0.84
   4  26  -2    4.27    0.73
  -4  26   2    3.12    0.68
  -4  26   2    5.09    0.55
  -4  26   2    3.81    0.70
  -3 -26   2    1.35    0.53
  -3 -26   2    1.87    0.32
   3 -26  -2    2.18    0.50
  -3 -26   2    2.32    0.58
  -3  26   2    3.09    1.19
  -3  26   2    2.88    0.36
  -3  26   2    3.05    0.53
   3  26  -2    4.43    0.64
   2 -26  -2    3.01    0.57
  -2 -26   2    2.40    0.59
  -2  26   2    2.06    0.98
  -2  26   2    2.68    0.50
  -2  26   2    3.21    0.37
   2  26  -2    2.87    0.58
   1 -26  -2   84.00    8.17
  -1 -26   2   87.72    8.19
  -1 -26   2   76.69    6.85
   1 -26  -2   85.37    6.87
  -1  26   2   80.39    8.36
   1  26  -2   93.90    8.19
   0 -26  -2    3.40    0.39
   0 -26   2    3.62    0.61
   0 -26  -2    3.28    0.64
   0 -26   2    3.33    0.40
   0  26   2    3.38    0.51
   0  26  -2    2.51    0.63
   0  26   2    2.26    0.93
  -1 -26  -2   16.66    1.80
   1 -26   2   16.45    1.73
   1 -26   2   16.40    1.38
  -1 -26  -2   14.62    1.36
   1  26   2   14.29    1.69
   1  26   2   16.05    2.28
   1  26   2   18.47    1.83
  -1  26  -2   17.52    1.80
  -2 -26  -2    3.02    0.65
  -2  26  -2    3.37    0.39
  -2  26  -2    2.89    0.44
   2  26   2    3.87    0.68
  -2  26  -2    1.24    0.78
  -3 -26  -2    0.07    0.17
  -3 -26  -2   -0.13    0.44
   3 -26   2    0.11    0.74
   3 -26   2    0.90    0.33
  -3 -26  -2    0.26    0.48
  -3  26  -2    0.14    0.21
  -3  26  -2    0.31    0.24
   3  26   2    0.03    0.38
  -3  26  -2   -0.02    0.72
   4 -26   2    0.24    0.28
  -4 -26  -2    0.18    0.18
  -4 -26  -2   -0.73    0.41
  -4 -26  -2    0.18    0.20
  -4 -26  -2    0.12    0.21
  -4 -26  -2   -0.08    0.35
  -4  26  -2    0.18    0.27
  -4  26  -2    0.28    0.17
  -4  26  -2    0.47    0.32
  -5 -26  -2    0.04    0.16
  -5 -26  -2    0.22    0.23
  -5 -26  -2    0.27    0.22
   5 -26   2    0.25    0.28
  -5  26  -2    0.28    0.33
  -5  26  -2    0.11    0.29
  -6 -26  -2    1.82    0.28
  -6 -26  -2    2.01    0.36
  -6 -26  -2    1.77    0.34
   6 -26   2    2.18    0.41
  -6  26  -2    2.18    0.44
  -6  26  -2    2.02    0.43
  -7 -26  -2   -0.19    0.22
  -7 -26  -2    0.09    0.12
  -7 -26  -2   -0.38    0.20
   7 -26   2    0.22    0.25
  -7  26  -2    0.07    0.30
  -7  26  -2    0.30    0.21
  -7  26  -2    0.07    0.26
   7 -27  -2    0.29    0.21
  -7 -27   2   -0.08    0.12
  -7 -27   2   -0.05    0.20
  -7 -27   2    0.18    0.24
  -7 -27   2   -0.34    0.25
  -7  27   2   -0.28    0.20
  -7  27   2   -0.10    0.43
  -7  27   2   -0.50    0.38
   6 -27  -2    6.31    0.65
  -6 -27   2    4.66    0.58
  -6 -27   2    5.20    0.65
  -6 -27   2    4.33    0.54
  -6 -27   2    5.05    0.58
  -6  27   2    5.76    0.88
  -6  27   2    5.40    0.88
  -5 -27   2    0.55    0.31
  -5 -27   2    0.59    0.41
  -5 -27   2    0.97    0.23
  -5 -27   2    1.46    0.29
  -5 -27   2    1.23    0.28
  -5  27   2    0.80    0.49
   5  27  -2    1.05    0.45
  -5  27   2    0.51    0.47
  -4 -27   2    6.88    0.63
   4 -27  -2    4.14    0.74
  -4 -27   2    5.64    0.70
  -4 -27   2    5.02    0.83
  -4 -27   2    5.99    0.62
   4 -27  -2    4.93    0.67
  -4 -27   2    6.29    0.63
   4  27  -2    7.22    0.90
  -4  27   2    4.81    0.80
  -4  27   2    5.84    0.63
  -4  27   2    4.64    0.78
   3 -27  -2   15.90    1.73
  -3 -27   2   14.58    1.48
  -3 -27   2   18.11    1.82
  -3  27   2   15.84    1.77
   3  27  -2   17.69    1.79
  -3  27   2   15.83    1.40
   2 -27  -2   44.72    4.40
  -2 -27   2   42.76    4.42
  -2  27   2   40.22    5.19
   2  27  -2   49.40    4.43
  -2  27   2   44.89    3.66
  -2  27   2   41.66    4.47
  -1 -27   2    3.97    0.75
   1 -27  -2    5.38    0.54
  -1 -27   2    4.82    0.50
   1 -27  -2    5.85    0.83
   1  27  -2    5.09    0.82
  -1  27   2    4.75    1.23
  -1  27   2    4.68    0.68
   0 -27   2   38.38    3.74
   0 -27  -2   37.98    3.08
   0 -27   2   38.46    3.09
   0 -27  -2   36.51    3.75
   0  27   2   31.44    3.75
   0  27   2   33.61    4.35
   0  27  -2   46.50    3.88
   1 -27   2   12.22    1.47
  -1 -27  -2   13.61    1.54
  -1  27  -2   16.08    1.58
   1  27   2   11.05    1.43
   1  27   2   19.26    1.68
   1  27   2   10.70    1.92
  -2 -27  -2   19.24    2.14
  -2  27  -2   19.49    1.67
  -2  27  -2   19.05    2.51
   2  27   2   23.48    2.16
  -2  27  -2   17.87    2.01
  -3 -27  -2    7.33    0.76
  -3 -27  -2    7.38    1.10
   3 -27   2    5.92    0.86
   3  27   2    9.35    1.08
  -3  27  -2    6.94    0.88
  -3  27  -2    8.23    0.75
  -4 -27  -2    9.73    0.87
  -4 -27  -2    7.28    0.84
  -4 -27  -2    7.35    1.16
  -4 -27  -2    9.16    0.88
   4 -27   2    7.64    0.99
  -4 -27  -2    8.22    1.00
  -4  27  -2    9.28    1.00
  -4  27  -2    8.40    0.78
  -4  27  -2    8.64    1.04
   4  27   2   11.88    1.17
  -5 -27  -2    0.28    0.23
  -5 -27  -2    0.32    0.19
  -5 -27  -2    0.67    0.25
  -5 -27  -2    0.50    0.34
   5 -27   2    0.45    0.30
   5  27   2    0.90    0.41
  -5  27  -2    1.46    0.37
  -5  27  -2    0.62    0.31
  -6 -27  -2   14.39    1.31
  -6 -27  -2   12.50    1.25
   6 -27   2   11.84    1.41
  -6 -27  -2   14.36    1.27
  -6  27  -2   14.58    1.51
  -6  27  -2   14.70    1.42
   7 -27   2   -0.17    0.23
  -7 -27  -2   -0.04    0.21
  -7 -27  -2    0.18    0.24
  -7 -27  -2    0.25    0.13
  -7  27  -2    0.43    0.22
  -7  27  -2    0.10    0.31
  -7  27  -2   -0.03    0.27
  -7 -28   2   -0.18    0.22
  -7 -28   2    0.24    0.12
  -7 -28   2    0.00    0.20
  -7 -28   2    0.19    0.24
   7 -28  -2    0.26    0.19
  -7  28   2   -0.61    0.41
  -7  28   2   -0.09    0.38
   6 -28  -2    0.51    0.22
  -6 -28   2    0.09    0.22
  -6 -28   2   -0.24    0.24
  -6 -28   2    0.18    0.17
  -6 -28   2    0.04    0.24
  -6  28   2   -0.46    0.41
  -6  28   2    0.23    0.49
  -5 -28   2    0.21    0.22
  -5 -28   2    0.51    0.30
  -5 -28   2    0.17    0.24
  -5 -28   2    0.33    0.39
  -5 -28   2    0.21    0.19
  -5  28   2    0.71    0.48
   5  28  -2    0.41    0.40
  -5  28   2   -0.18    0.44
  -4 -28   2    0.49    0.31
   4 -28  -2    0.65    0.30
   4 -28  -2    0.12    0.32
  -4 -28   2    0.99    0.23
  -4 -28   2    0.82    0.23
  -4 -28   2    0.88    0.26
  -4 -28   2    1.03    0.45
  -4  28   2    0.25    0.38
  -4  28   2    0.33    0.41
  -4  28   2    0.38    0.29
   4  28  -2    0.62    0.43
   3 -28  -2    0.97    0.41
  -3 -28   2    1.93    0.31
  -3 -28   2    1.58    0.27
  -3 -28   2    1.84    0.30
   3 -28  -2    1.34    0.36
  -3 -28   2    2.44    0.44
  -3 -28   2    1.35    0.51
  -3  28   2    1.06    0.46
  -3  28   2    1.71    0.46
  -3  28   2    0.79    0.28
   3  28  -2    2.17    0.54
  -2 -28   2    0.93    0.45
   2 -28  -2    0.63    0.40
  -2  28   2    0.19    0.32
   2  28  -2   -0.06    0.39
  -2  28   2    0.77    0.23
  -1 -28   2    4.21    0.71
  -1 -28   2    3.78    0.41
   1 -28  -2    3.83    0.44
   1 -28  -2    4.31    0.71
  -1  28   2    3.48    0.57
   1  28  -2    4.02    0.74
  -1  28   2    2.39    1.04
   0 -28  -2   21.14    1.67
   0 -28   2   20.12    1.69
   0 -28   2   19.05    2.08
   0 -28  -2   20.12    2.12
   0  28   2   16.39    2.04
   0  28   2   15.90    2.57
   0  28  -2   23.82    2.20
   1 -28   2   37.92    3.61
   1 -28   2   38.82    3.00
  -1 -28  -2   35.90    3.66
  -1 -28  -2   33.97    2.96
   1  28   2   33.77    3.63
  -2 -28  -2    6.72    0.94
  -2  28  -2    4.71    0.55
   2  28   2    6.74    0.89
  -2  28  -2    4.75    0.66
  -3 -28  -2   10.73    1.37
   3 -28   2    8.01    1.14
  -3 -28  -2    9.61    0.99
  -3 -28  -2    9.81    0.99
  -3 -28  -2    9.17    1.12
   3  28   2   12.75    1.30
  -3  28  -2   10.55    1.09
  -3  28  -2   10.49    0.95
  -3  28  -2   11.58    1.16
  -4 -28  -2    4.05    0.62
  -4 -28  -2    3.46    0.75
   4 -28   2    3.36    0.58
  -4 -28  -2    3.77    0.50
  -4 -28  -2    5.25    0.53
  -4 -28  -2    4.60    0.53
  -4  28  -2    5.52    0.66
   4  28   2    5.12    0.75
  -4  28  -2    4.39    0.46
  -4  28  -2    4.87    0.66
  -5 -28  -2   16.63    1.69
  -5 -28  -2   17.33    1.83
  -5 -28  -2   20.13    1.72
  -5 -28  -2   19.15    1.76
   5 -28   2   16.61    1.90
   5  28   2   22.09    2.05
  -5  28  -2   20.74    1.89
  -5  28  -2   19.61    2.01
  -6 -28  -2    0.01    0.15
  -6 -28  -2    0.16    0.23
  -6 -28  -2    0.01    0.21
   6 -28   2   -0.11    0.24
  -6  28  -2    0.16    0.29
  -6  28  -2    0.10    0.28
  -7 -28  -2   -0.32    0.18
  -7 -28  -2    0.13    0.23
  -7 -28  -2    0.08    0.12
   7 -28   2   -0.03    0.22
  -7  28  -2    0.61    0.23
  -7  28  -2    0.44    0.27
  -7  28  -2   -0.18    0.28
  -6 -29   2    0.33    0.26
  -6 -29   2    0.77    0.24
  -6 -29   2    0.73    0.27
  -6 -29   2    0.54    0.19
  -6  29   2    0.07    0.42
  -6  29   2    0.17    0.46
  -5 -29   2    0.30    0.29
  -5 -29   2    0.51    0.25
  -5 -29   2    0.27    0.20
  -5 -29   2    0.44    0.23
  -5  29   2    0.45    0.49
  -5  29   2    0.23    0.48
  -4 -29   2   16.04    1.63
  -4 -29   2   18.67    1.54
   4 -29  -2   13.72    1.58
  -4 -29   2   15.94    1.54
  -4 -29   2   16.39    1.50
  -4 -29   2   13.85    1.79
  -4  29   2   16.29    1.74
   4  29  -2   19.53    1.85
  -4  29   2   19.32    1.50
  -3 -29   2   -0.26    0.27
  -3 -29   2    0.25    0.22
   3 -29  -2   -0.34    0.26
  -3 -29   2   -0.02    0.18
   3 -29  -2   -0.13    0.30
  -3 -29   2    0.26    0.41
   3  29  -2    0.37    0.42
  -3  29   2   -0.22    0.23
  -3  29   2   -0.08    0.34
  -3  29   2   -0.28    0.35
   2 -29  -2   10.32    1.26
  -2 -29   2   10.73    1.14
   2 -29  -2   11.95    1.13
  -2 -29   2    9.19    1.30
  -2  29   2    9.77    1.16
   2  29  -2   12.48    1.36
  -2  29   2    9.16    1.23
  -2  29   2   11.74    1.00
   1 -29  -2    7.08    0.97
   1 -29  -2    6.17    0.66
  -1 -29   2    6.90    0.99
  -1 -29   2    6.58    0.64
  -1  29   2    6.37    0.85
   1  29  -2    8.12    1.08
   0 -29  -2    0.05    0.19
   0 -29   2   -0.23    0.36
   0 -29   2    0.14    0.21
   0 -29  -2   -0.04    0.39
   0  29  -2    0.04    0.44
   0  29   2    0.00    0.27
   1 -29   2   20.97    1.98
  -1 -29  -2   17.53    1.54
  -1 -29  -2   19.33    2.01
  -1 -29  -2   17.24    1.79
   1 -29   2   19.95    1.59
   1  29   2   15.84    1.91
  -2 -29  -2   26.43    2.98
  -2 -29  -2   28.42    2.73
  -2  29  -2   30.49    2.43
  -2  29  -2   28.57    2.93
  -3 -29  -2    2.04    0.45
  -3 -29  -2    1.89    0.32
  -3 -29  -2    1.84    0.32
  -3 -29  -2    1.73    0.57
  -3  29  -2    1.95    0.40
   3  29   2    2.09    0.54
  -3  29  -2    2.76    0.42
  -3  29  -2    2.58    0.35
  -4 -29  -2    2.77    0.66
  -4 -29  -2    3.59    0.45
  -4 -29  -2    4.24    0.48
  -4 -29  -2    3.55    0.55
   4 -29   2    3.15    0.51
  -4 -29  -2    3.16    0.44
  -4  29  -2    3.65    0.58
  -4  29  -2    3.82    0.40
   4  29   2    4.90    0.74
  -4  29  -2    5.15    0.62
  -5 -29  -2   -0.18    0.19
   5 -29   2    0.24    0.26
  -5 -29  -2   -0.27    0.17
  -5 -29  -2   -0.02    0.21
  -5 -29  -2    0.01    0.26
  -5  29  -2    0.20    0.31
  -5  29  -2    0.14    0.28
  -6 -29  -2   -0.19    0.22
  -6 -29  -2    0.10    0.16
   6 -29   2    0.52    0.25
  -6 -29  -2    0.41    0.23
  -6  29  -2    0.40    0.31
  -6  29  -2    0.23    0.28
  -6 -30   2    4.35    0.44
  -6 -30   2    3.05    0.49
  -6 -30   2    3.56    0.46
  -6 -30   2    4.03    0.47
  -6  30   2    3.59    0.68
  -6  30   2    3.67    0.68
  -5 -30   2    0.77    0.26
  -5 -30   2    0.46    0.28
  -5 -30   2    0.90    0.24
  -5 -30   2    0.32    0.20
  -5  30   2    0.19    0.48
  -5  30   2    0.07    0.47
  -4 -30   2    1.03    0.25
  -4 -30   2    1.09    0.26
  -4 -30   2    1.20    0.28
   4 -30  -2    1.52    0.32
  -4 -30   2    1.59    0.48
  -4 -30   2    1.71    0.37
   4  30  -2    0.78    0.42
  -4  30   2    1.02    0.48
  -4  30   2    1.07    0.33
  -4  30   2    1.48    0.49
  -3 -30   2   -0.27    0.20
  -3 -30   2    0.12    0.39
   3 -30  -2    0.25    0.33
   3 -30  -2    0.32    0.27
  -3 -30   2   -0.07    0.28
  -3  30   2   -0.10    0.33
  -3  30   2   -0.19    0.25
  -3  30   2    0.28    0.37
   3  30  -2    0.12    0.41
  -2 -30   2    6.72    1.02
  -2 -30   2    7.78    0.87
   2 -30  -2    7.51    0.84
   2 -30  -2    7.19    0.71
   2 -30  -2    5.55    0.92
  -2  30   2    7.81    0.91
  -2  30   2    7.75    0.95
   2  30  -2    7.74    1.05
  -2  30   2    7.27    0.73
  -1 -30   2    4.97    0.62
   1 -30  -2    3.40    0.45
   1 -30  -2    4.71    0.60
  -1 -30   2    3.70    0.40
   1 -30  -2    4.20    0.72
  -1 -30   2    3.62    0.72
  -1  30   2    3.74    0.61
  -1  30   2    4.48    0.62
   1  30  -2    6.46    0.92
   0 -30  -2    8.94    0.86
   0 -30   2    9.62    0.88
   0 -30   2   10.67    1.04
   0 -30  -2    8.69    1.18
   0 -30   2    8.38    1.16
   0 -30  -2   10.32    1.04
   0  30  -2   12.13    1.33
   0  30   2    9.19    1.10
   0  30   2    7.97    1.03
   1 -30   2   13.04    1.43
   1 -30   2   13.00    1.14
  -1 -30  -2   11.91    1.07
  -1 -30  -2   11.57    1.30
   1 -30   2   14.61    1.28
  -1 -30  -2   11.24    1.46
   1  30   2   11.99    1.37
  -2 -30  -2    0.02    0.31
  -2 -30  -2   -0.55    0.38
   2 -30   2    0.06    0.23
   2  30   2    0.19    0.44
  -2  30  -2    0.69    0.24
  -3 -30  -2    4.99    0.60
  -3 -30  -2    4.61    0.69
  -3 -30  -2    5.70    0.62
  -3 -30  -2    3.85    0.81
   3  30   2    7.88    0.93
  -3  30  -2    4.83    0.56
  -3  30  -2    6.08    0.73
  -3  30  -2    6.63    0.71
  -4 -30  -2    0.32    0.29
  -4 -30  -2    0.27    0.22
   4 -30   2    0.28    0.26
  -4 -30  -2    0.65    0.42
  -4 -30  -2    0.64    0.23
  -4 -30  -2    0.83    0.23
  -4  30  -2    0.51    0.32
  -4  30  -2    0.80    0.34
  -4  30  -2    0.29    0.18
   4  30   2    0.70    0.39
   5 -30   2   -0.08    0.22
  -5 -30  -2    0.11    0.25
  -5 -30  -2   -0.10    0.20
  -5 -30  -2    0.19    0.19
  -5 -30  -2    0.06    0.21
  -5  30  -2    0.10    0.27
  -5  30  -2    0.58    0.31
  -6 -30  -2    2.76    0.32
  -6 -30  -2    2.11    0.34
   6 -30   2    2.07    0.36
  -6 -30  -2    1.97    0.34
  -6  30  -2    2.37    0.42
  -6  30  -2    3.05    0.45
  -6 -31   2    0.44    0.21
  -6 -31   2    0.58    0.25
  -6 -31   2    0.90    0.19
  -6 -31   2    0.64    0.26
  -6  31   2    0.31    0.42
  -6  31   2    0.70    0.48
  -5 -31   2    2.04    0.37
  -5 -31   2    1.50    0.31
  -5 -31   2    1.68    0.30
  -5 -31   2    1.98    0.30
  -5  31   2    1.84    0.55
  -5  31   2    1.68    0.58
  -4 -31   2    6.39    0.74
  -4 -31   2    6.34    0.65
  -4 -31   2    5.89    0.63
  -4 -31   2    5.50    0.62
   4 -31  -2    4.92    0.65
  -4  31   2    6.09    0.61
  -4  31   2    6.72    0.91
  -4  31   2    6.67    0.88
  -3 -31   2    2.20    0.34
  -3 -31   2    3.20    0.60
   3 -31  -2    2.54    0.40
   3 -31  -2    1.63    0.45
  -3 -31   2    2.58    0.45
   3  31  -2    1.77    0.56
  -3  31   2    2.73    0.55
  -3  31   2    2.81    0.54
  -3  31   2    2.34    0.41
   2 -31  -2   10.02    1.23
  -2 -31   2   11.67    1.37
   2 -31  -2    9.96    1.09
   2 -31  -2    8.84    0.95
  -2 -31   2   10.93    1.14
  -2  31   2   11.10    1.25
  -2  31   2   10.77    1.17
   2  31  -2   13.33    1.41
  -2  31   2   11.71    1.00
   1 -31  -2    1.75    0.32
  -1 -31   2    3.15    0.46
   1 -31  -2    3.49    0.48
   1 -31  -2    2.06    0.54
  -1 -31   2    2.44    0.27
  -1 -31   2    2.25    0.55
  -1  31   2    1.97    0.45
   1  31  -2    1.86    0.62
  -1  31   2    2.60    0.48
   0 -31  -2    0.03    0.37
   0 -31   2    0.80    0.34
   0 -31  -2    0.58    0.32
   0 -31   2    0.75    0.42
   0 -31   2    0.22    0.20
   0  31   2    0.41    0.33
   0  31   2    0.22    0.28
   0  31  -2    0.43    0.44
  -1 -31  -2    2.85    0.64
   1 -31   2    3.19    0.45
  -1 -31  -2    2.47    0.27
   1 -31   2    2.58    0.53
   1 -31   2    2.20    0.36
  -1 -31  -2    2.09    0.46
   1  31   2    2.81    0.46
  -2 -31  -2   -0.47    0.38
  -2 -31  -2    0.31    0.31
   2 -31   2    0.03    0.23
  -2  31  -2    1.51    0.28
   2  31   2    0.84    0.46
  -3 -31  -2    2.87    0.65
  -3 -31  -2    3.86    0.56
  -3  31  -2    3.34    0.55
   3  31   2    5.82    0.78
  -3  31  -2    4.68    0.47
  -3  31  -2    3.97    0.55
   4 -31   2    4.24    0.56
  -4 -31  -2    4.32    0.52
  -4 -31  -2    4.84    0.53
  -4 -31  -2    5.00    0.61
  -4 -31  -2    3.30    0.48
  -4  31  -2    5.72    0.47
  -4  31  -2    4.58    0.62
  -4  31  -2    4.87    0.65
  -5 -31  -2   -0.20    0.19
  -5 -31  -2   -0.13    0.19
   5 -31   2    0.40    0.22
  -5 -31  -2   -0.08    0.17
  -5 -31  -2    0.18    0.24
  -5  31  -2   -0.06    0.28
  -5  31  -2    0.32    0.27
   6 -31   2    0.45    0.21
  -6 -31  -2    0.27    0.16
  -6 -31  -2    0.37    0.20
  -6 -31  -2    0.36    0.21
  -6  31  -2    0.42    0.29
  -6  31  -2    0.38    0.26
  -5 -32   2    0.17    0.19
  -5 -32   2   -0.09    0.21
  -5 -32   2   -0.03    0.18
  -5 -32   2   -0.45    0.23
  -5  32   2    0.20    0.49
  -5  32   2   -0.23    0.44
  -4 -32   2   -0.07    0.18
   4 -32  -2    0.14    0.21
  -4 -32   2    0.04    0.27
  -4 -32   2    0.32    0.21
  -4  32   2   -0.01    0.40
  -4  32   2    0.10    0.22
  -4  32   2   -0.16    0.41
   3 -32  -2   -0.27    0.21
   3 -32  -2    0.43    0.32
  -3 -32   2   -0.27    0.35
  -3 -32   2    0.09    0.28
   3  32  -2    0.14    0.38
  -3  32   2    0.21    0.37
  -3  32   2   -0.65    0.26
  -3  32   2   -0.47    0.32
   2 -32  -2    0.51    0.22
  -2 -32   2    0.91    0.34
   2 -32  -2    0.85    0.30
  -2 -32   2    0.91    0.44
   2 -32  -2    1.32    0.41
  -2  32   2    1.04    0.30
   2  32  -2    1.50    0.56
  -2  32   2    0.68    0.38
  -2  32   2    1.17    0.39
   1 -32  -2    0.34    0.39
  -1 -32   2    0.58    0.32
   1 -32  -2    0.13    0.29
   1 -32  -2    0.02    0.20
  -1 -32   2    1.07    0.45
  -1 -32   2    0.47    0.12
  -1  32   2    0.35    0.33
  -1  32   2    0.13    0.30
   1  32  -2    0.75    0.50
   0 -32  -2    4.91    0.77
   0 -32  -2    5.68    0.53
   0 -32   2    5.40    0.66
   0 -32  -2    5.67    0.68
   0 -32   2    5.75    0.55
   0 -32   2    4.99    0.79
   0  32   2    4.21    0.67
   0  32   2    4.06    0.65
   0  32  -2    5.03    0.80
   1 -32   2    0.19    0.36
  -1 -32  -2   -0.23    0.27
   1 -32   2    0.38    0.27
   1 -32   2   -0.03    0.21
  -1 -32  -2    0.52    0.41
   2 -32   2    8.50    0.88
  -2 -32  -2    8.91    1.21
  -2 -32  -2    8.04    1.01
  -2  32  -2   10.72    0.91
   2  32   2   12.88    1.28
  -3 -32  -2    2.33    0.46
  -3 -32  -2    3.13    0.60
  -3  32  -2    3.04    0.48
   3  32   2    3.70    0.65
  -3  32  -2    2.82    0.46
  -3  32  -2    2.67    0.37
  -4 -32  -2    0.13    0.26
  -4 -32  -2   -0.04    0.18
  -4 -32  -2   -0.06    0.17
  -4 -32  -2   -0.13    0.17
  -4  32  -2    0.14    0.27
  -4  32  -2   -0.05    0.15
  -4  32  -2    0.46    0.29
  -5 -32  -2    0.08    0.23
  -5 -32  -2    0.29    0.19
  -5 -32  -2    0.34    0.19
  -5 -32  -2    0.28    0.20
   5 -32   2    0.12    0.20
  -5  32  -2    0.14    0.27
  -5  32  -2    0.21    0.26
  -5 -33   2    0.00    0.24
  -5 -33   2    0.03    0.18
  -5 -33   2   -0.03    0.17
  -5 -33   2   -0.31    0.19
  -5  33   2    0.30    0.42
  -5  33   2   -0.05    0.46
  -4 -33   2    1.17    0.32
  -4 -33   2    0.93    0.26
   4 -33  -2    1.77    0.30
  -4 -33   2    1.72    0.30
  -4  33   2    1.39    0.22
  -4  33   2    2.07    0.51
  -4  33   2    2.97    0.57
   3 -33  -2    2.05    0.34
  -3 -33   2    1.36    0.38
  -3  33   2    2.31    0.51
  -3  33   2    1.43    0.38
  -3  33   2    2.35    0.51
   2 -33  -2    1.68    0.41
  -2 -33   2    1.31    0.36
  -2 -33   2    1.09    0.45
   2 -33  -2    0.92    0.24
   2 -33  -2    1.41    0.34
  -2  33   2    1.32    0.32
  -2  33   2    1.94    0.43
   2  33  -2    1.39    0.53
  -2  33   2    1.66    0.41
   1 -33  -2    0.33    0.35
  -1 -33   2    0.53    0.31
   1 -33  -2    0.52    0.31
  -1 -33   2    0.51    0.40
   1  33  -2    0.67    0.44
  -1  33   2    0.90    0.33
  -1  33   2    0.48    0.34
   0 -33   2    0.15    0.27
   0 -33   2    0.06    0.17
   0 -33  -2    0.29    0.37
   0 -33  -2    0.02    0.16
   0 -33   2    0.49    0.39
   0 -33  -2    0.33    0.31
   0  33   2    0.23    0.28
   0  33   2   -0.36    0.27
  -1 -33  -2    2.35    0.44
   1 -33   2    3.73    0.47
   1 -33   2    2.15    0.34
  -1 -33  -2    2.61    0.56
   2 -33   2    1.13    0.25
  -2 -33  -2    0.13    0.37
  -2 -33  -2    1.28    0.33
  -2  33  -2    1.22    0.28
  -3 -33  -2   16.85    1.76
  -3  33  -2   19.01    1.57
  -3  33  -2   18.41    1.80
  -3  33  -2   18.85    1.93
  -4 -33  -2    0.64    0.27
  -4 -33  -2    0.73    0.21
  -4 -33  -2    0.62    0.23
  -4 -33  -2    1.12    0.22
  -4  33  -2    0.99    0.31
  -4  33  -2    1.08    0.32
  -5 -33  -2    0.97    0.21
  -5 -33  -2    0.32    0.18
  -5 -33  -2    0.76    0.23
  -5 -33  -2    0.64    0.20
  -5  33  -2    0.80    0.27
  -5  33  -2    1.00    0.29
  -4 -34   2    4.34    0.50
  -4 -34   2    4.15    0.48
  -4 -34   2    5.00    0.58
  -4  34   2    3.96    0.70
  -3 -34   2   -0.04    0.27
   3 -34  -2    0.10    0.22
   3 -34  -2   -0.05    0.16
  -3  34   2   -0.60    0.27
  -3  34   2    0.21    0.35
  -3  34   2   -0.15    0.36
   2 -34  -2    6.17    0.73
  -2 -34   2    6.28    0.76
  -2  34   2    7.48    0.85
  -2  34   2    7.81    0.90
  -2  34   2    5.94    0.69
  -1 -34   2    7.94    0.91
   1 -34  -2    8.81    0.77
   1 -34  -2    8.86    0.91
  -1  34   2    8.52    1.01
  -1  34   2    7.18    0.93
   0 -34  -2    0.63    0.31
   0 -34   2    0.71    0.29
   0 -34  -2    0.96    0.18
   0 -34  -2    0.09    0.35
   0 -34   2    0.64    0.17
   0  34   2    0.56    0.30
   0  34   2    0.74    0.32
   1 -34   2    0.11    0.19
  -1 -34  -2    0.13    0.35
  -1 -34  -2    0.23    0.29
   1 -34   2    0.50    0.26
   2 -34   2    2.06    0.33
  -2 -34  -2    3.10    0.45
  -2  34  -2    2.44    0.35
  -3 -34  -2    2.22    0.37
   3 -34   2    1.52    0.28
  -3  34  -2    2.11    0.29
  -3  34  -2    2.10    0.39
  -4 -34  -2   -0.12    0.23
  -4 -34  -2   -0.03    0.17
  -4  34  -2    0.49    0.25
  -4  34  -2    0.40    0.27
  -4 -35   2   -0.03    0.17
  -4 -35   2   -0.03    0.25
  -4 -35   2    0.11    0.17
  -4  35   2    0.14    0.37
  -4  35   2   -0.21    0.40
  -3 -35   2    1.11    0.32
   3 -35  -2    0.52    0.23
  -3  35   2    0.94    0.40
  -3  35   2    0.98    0.29
  -3  35   2    0.18    0.39
  -2 -35   2    1.50    0.34
   2 -35  -2    0.81    0.19
   2 -35  -2    0.78    0.27
  -2  35   2    0.67    0.30
  -2  35   2    0.52    0.36
  -2  35   2    0.73    0.35
   1 -35  -2    0.00    0.16
  -1 -35   2   -0.38    0.24
   1 -35  -2    0.14    0.25
  -1  35   2    0.07    0.29
  -1  35   2    0.19    0.31
   0 -35  -2   -0.29    0.25
   0 -35  -2    0.15    0.12
   0 -35   2    0.03    0.13
   0 -35   2    0.44    0.27
   0  35   2    0.33    0.29
  -1 -35  -2    0.36    0.28
   1 -35   2   -0.02    0.16
   1 -35   2    0.40    0.24
   2 -35   2    0.30    0.18
  -2 -35  -2    0.38    0.27
  -2  35  -2    0.36    0.21
  -3 -35  -2    0.37    0.26
   3 -35   2    0.27    0.17
  -3  35  -2    0.22    0.18
  -4 -35  -2    0.64    0.23
  -4 -35  -2    0.12    0.16
  -4  35  -2    0.28    0.23
  -4  35  -2    0.27    0.24
   3 -36  -2    0.03    0.19
   3 -36  -2    0.08    0.14
  -3 -36   2    0.40    0.27
  -3  36   2    0.10    0.33
  -3  36   2   -0.09    0.36
  -3  36   2   -0.22    0.19
  -2 -36   2    5.32    0.61
   2 -36  -2    4.43    0.57
   2 -36  -2    4.72    0.48
  -2  36   2    5.47    0.68
  -2  36   2    6.05    0.59
  -2  36   2    4.80    0.69
   1 -36  -2    2.72    0.41
  -1 -36   2    2.51    0.42
   1 -36  -2    2.24    0.28
  -1  36   2    2.65    0.47
  -1  36   2    2.99    0.40
  -1  36   2    2.76    0.46
   0 -36   2    0.29    0.25
   0 -36  -2    0.21    0.26
   1 -36   2    2.24    0.27
   1 -36   2    2.21    0.36
  -1 -36  -2    2.57    0.41
  -1  36  -2    2.31    0.35
   2 -36   2    0.23    0.16
  -2 -36  -2    0.17    0.26
  -2  36  -2   -0.20    0.17
   3 -36   2    0.42    0.16
  -3 -36  -2    0.70    0.25
  -3  36  -2    0.28    0.17
   2 -37  -2    0.36    0.13
  -2 -37   2    0.15    0.24
   2 -37  -2    0.30    0.21
  -2  37   2   -0.23    0.24
  -2  37   2    1.02    0.33
  -2  37   2    0.88    0.33
  -1 -37   2   -0.21    0.23
   1 -37  -2    0.19    0.12
   1 -37  -2   -0.07    0.22
  -1  37   2   -0.27    0.23
  -1  37   2   -0.15    0.26
  -1  37   2   -0.03    0.28
   0 -37  -2    0.71    0.27
   0 -37   2    0.50    0.25
  -1 -37  -2    1.41    0.31
   1 -37   2    1.20    0.18
   1 -37   2    1.24    0.28
  -1  37  -2    1.02    0.25
   2 -37   2    0.02    0.13
  -2 -37  -2   -0.01    0.23
  -2  37  -2   -0.22    0.17
   1 -38  -2    0.21    0.21
  -1 -38   2    0.23    0.22
  -1  38   2    0.12    0.25
  -1  38   2    0.37    0.24
   0 -38  -2    0.55    0.24
   0 -38   2    0.12    0.20
   1 -38   2    0.95    0.23
  -1 -38  -2    0.90    0.27
  -1  38  -2    1.01    0.23
  -8   0   3    0.56    0.24
  -7   0   3   57.05    5.40
  -7   0   3   62.85    6.56
  -7   0   3   52.54    5.38
  -6   0   3    0.25    0.31
   6   0  -3    0.20    0.72
  -6   0   3    0.59    0.22
  -6   0   3    0.23    0.46
  -6   0   3    0.02    0.45
  -5   0   3    8.36    1.59
  -5   0   3   11.58    1.14
  -5   0   3    9.39    1.32
   5   0  -3   11.86    1.51
  -5   0   3   12.49    1.23
   4   0  -3   -0.04    0.31
  -4   0   3    0.01    0.20
  -4   0   3    0.25    0.39
   4   0  -3    0.35    0.41
   3   0  -3  124.30   10.68
  -3   0   3  114.47   11.01
   3   0  -3  112.26   10.49
  -2   0   3    0.78    0.55
   2   0  -3    0.84    0.34
   2   0  -3    1.02    0.33
  -2   0   3    0.60    0.22
   2   0  -3    0.13    0.11
  -1   0   3    4.85    0.62
   1   0  -3    5.05    0.52
   1   0  -3    4.39    0.57
   0   0  -3   -0.04    0.19
   0   0   3   -0.05    0.41
   0   0  -3   -0.05    0.14
   1   0   3   26.13    2.63
  -1   0  -3   26.64    2.53
   2   0   3    0.77    0.15
   2   0   3    0.08    0.22
  -2   0  -3    1.21    0.48
  -2   0  -3    1.03    0.62
  -3   0  -3   98.67   11.07
   3   0   3  114.53    9.76
  -3   0  -3  100.33    9.22
  -3   0  -3  100.24    9.41
   3   0   3   98.96   11.15
  -4   0  -3   -0.06    0.52
   4   0   3   -0.07    0.17
   4   0   3    0.28    0.21
  -4   0  -3    0.28    0.45
  -5   0  -3   16.22    1.93
  -5   0  -3   17.98    1.72
   5   0   3   19.30    1.83
  -5   0  -3   15.89    2.42
  -5   0  -3   15.33    1.84
   6   0   3    0.28    0.35
  -6   0  -3   -0.62    0.70
  -6   0  -3   -0.11    0.17
  -7   0  -3   17.40    1.91
  -7   0  -3   24.03    2.93
  -7   0  -3   16.37    1.80
  -8   0  -3   -0.04    0.38
  -8   0  -3    0.23    0.35
  -9   1   3    3.86    0.54
  -8  -1   3    1.75    0.33
  -8   1   3    1.50    0.33
  -7  -1   3    0.78    0.66
  -7  -1   3    1.07    0.25
  -7   1   3   -0.03    0.58
  -7   1   3    0.49    0.30
  -7   1   3    0.61    0.24
   6  -1  -3   17.65    2.36
  -6  -1   3   18.72    2.55
  -6  -1   3   19.20    1.96
  -6  -1   3   19.87    2.18
  -6   1   3   22.22    2.24
  -6   1   3   18.88    2.07
  -6   1   3   20.05    1.97
   6   1  -3   19.03    2.39
  -6   1   3   21.27    2.57
  -5  -1   3    3.87    0.46
   5  -1  -3    2.92    0.80
  -5  -1   3    3.12    0.79
  -5  -1   3    3.98    0.56
  -5  -1   3    3.23    0.62
  -5   1   3    2.87    0.43
  -5   1   3    3.73    0.55
  -5   1   3    3.72    0.68
  -5   1   3    2.29    0.73
   5   1  -3    2.22    0.72
   4  -1  -3   26.82    2.86
  -4  -1   3   24.09    3.51
  -4  -1   3   33.87    2.95
   4  -1  -3   34.36    3.01
  -4   1   3   34.08    2.96
  -4   1   3   23.65    3.49
   4   1  -3   28.70    2.84
   4   1  -3   34.39    3.04
  -3  -1   3    2.02    0.31
  -3  -1   3    0.93    0.51
   3  -1  -3    2.04    0.43
   3  -1  -3    1.68    0.46
  -3   1   3    1.91    0.32
   3   1  -3    1.97    0.37
   3   1  -3    1.53    0.21
  -3   1   3    0.91    0.49
  -2  -1   3   20.71    1.88
  -2  -1   3   16.33    2.41
   2  -1  -3   21.24    1.89
   2  -1  -3   18.86    1.72
  -2  -1   3   16.58    1.89
  -2   1   3   20.11    1.89
   2   1  -3   18.67    1.82
   2   1  -3   19.68    1.74
  -2   1   3   16.63    2.34
   1  -1  -3   46.17    4.26
  -1  -1   3   41.53    4.26
   1  -1  -3   48.08    4.16
  -1  -1   3   49.96    4.46
  -1   1   3   47.40    4.45
   1   1  -3   44.02    4.18
   0  -1  -3    3.55    0.49
   0  -1   3    4.20    0.76
   0  -1  -3    3.49    0.47
   0   1  -3    3.72    0.50
   0   1   3    1.44    0.54
  -1  -1  -3   98.50    9.49
  -1  -1  -3  111.24    9.48
   1  -1   3  101.44    9.96
   1   1   3  107.83   10.02
  -2  -1  -3   48.27    4.16
  -2  -1  -3   37.45    4.24
   2  -1   3   46.62    4.37
  -2  -1  -3   54.48    5.11
   2   1   3   47.68    4.39
  -2   1  -3   41.65    4.28
  -2   1  -3   43.08    4.98
  -3  -1  -3    2.91    0.38
  -3  -1  -3    2.06    0.57
  -3  -1  -3    1.95    0.73
   3  -1   3    3.00    0.45
   3  -1   3    3.03    0.43
   3   1   3    3.02    0.44
  -3   1  -3    2.10    0.65
  -3   1  -3    2.78    0.69
  -3   1  -3    2.93    0.36
   3   1   3    2.89    0.42
   4  -1   3   93.50   10.39
   4  -1   3  102.57    9.08
  -4  -1  -3   97.59   10.37
  -4  -1  -3   91.05    8.79
  -4   1  -3   95.07    8.83
  -4   1  -3   82.78   10.29
   4   1   3  101.83    9.09
  -5  -1  -3   18.23    1.88
  -5  -1  -3   18.90    2.27
  -5  -1  -3   15.33    1.73
  -5  -1  -3   15.07    1.60
   5  -1   3   16.90    1.69
   5   1   3   17.78    1.71
  -5   1  -3   16.90    2.39
  -5   1  -3   13.27    1.73
  -5   1  -3   16.24    1.60
  -5   1  -3   15.22    1.92
   6  -1   3    3.78    0.70
  -6  -1  -3    4.13    0.69
  -6  -1  -3    5.51    0.64
  -6  -1  -3    5.94    1.24
   6   1   3    5.16    0.79
  -6   1  -3    5.79    1.32
  -6   1  -3    4.20    0.58
  -7  -1  -3   -0.19    0.88
  -7  -1  -3    0.91    0.35
  -7  -1  -3    1.52    0.39
  -7   1  -3    0.75    0.32
  -7   1  -3    1.71    1.13
  -7   1  -3    0.60    0.38
  -8  -1  -3    0.21    0.36
  -8   1  -3   -0.21    0.35
  -8   1  -3    0.28    0.38
  -8   1  -3    0.32    0.45
  -9   2   3    0.27    0.25
  -9   2   3    0.11    0.32
  -8   2   3   10.88    1.12
  -8   2   3    9.59    1.19
  -7  -2   3    1.12    0.68
  -7  -2   3    1.21    0.28
  -7   2   3    1.26    0.29
  -7   2   3    0.95    0.33
  -7   2   3    0.92    0.67
  -6  -2   3   -0.49    0.43
   6  -2  -3   -0.14    0.70
  -6  -2   3    0.23    0.43
  -6   2   3    0.31    0.20
  -6   2   3    0.23    0.43
  -6   2   3    0.16    0.31
  -6   2   3    0.36    0.51
   6   2  -3    0.29    0.71
  -5  -2   3  164.55   14.59
  -5  -2   3  150.29   14.83
   5  -2  -3  160.47   14.21
  -5  -2   3  157.99   14.48
  -5  -2   3  133.24   16.89
  -5   2   3  156.70   14.60
  -5   2   3  154.82   14.49
  -5   2   3  167.85   14.85
  -5   2   3  134.80   16.88
   5   2  -3  156.82   14.21
  -4  -2   3    0.32    0.43
   4  -2  -3    1.01    0.47
  -4  -2   3    0.74    0.25
   4   2  -3    0.13    0.45
  -4   2   3    0.88    0.45
  -4   2   3    0.90    0.27
  -3  -2   3  187.01   16.39
   3  -2  -3  170.14   15.61
  -3  -2   3  185.20   15.90
  -3   2   3  166.29   18.37
   3   2  -3  182.32   15.52
  -3   2   3  150.87   18.96
  -2  -2   3    7.70    0.72
   2  -2  -3    5.97    0.80
  -2  -2   3    6.78    1.26
  -2  -2   3    7.09    0.89
  -2   2   3    5.70    0.71
  -2   2   3    4.89    0.98
   2   2  -3    6.27    0.62
   1  -2  -3   11.66    1.24
  -1  -2   3   14.44    1.31
  -1  -2   3    9.85    1.25
   1  -2  -3   11.55    1.13
   1   2  -3   12.93    1.15
  -1   2   3   12.80    1.27
   0  -2  -3   36.38    3.38
   0  -2  -3   42.09    3.44
   0  -2   3   34.62    3.39
   0   2   3   31.46    3.59
   0   2  -3   40.58    3.40
  -1  -2  -3   62.11    6.10
  -1  -2  -3   69.49    6.07
   1  -2   3   61.08    6.37
  -1   2  -3   75.94    6.13
   1   2   3   67.54    6.49
  -2  -2  -3   48.74    4.34
  -2  -2  -3   42.31    4.44
  -2  -2  -3   52.00    5.29
   2  -2   3   47.53    4.57
  -2  -2  -3   48.13    4.41
   2   2   3   50.74    4.62
  -2   2  -3   47.30    4.49
  -2   2  -3   45.33    5.19
   3  -2   3    8.02    0.97
  -3  -2  -3    6.78    1.24
  -3  -2  -3    7.27    1.01
   3  -2   3    9.18    0.87
  -3  -2  -3    7.98    0.82
  -3   2  -3    7.08    1.11
   3   2   3    8.29    0.89
  -3   2  -3    5.49    1.09
  -4  -2  -3   47.77    5.27
  -4  -2  -3   45.53    4.25
  -4  -2  -3   44.00    4.45
   4  -2   3   50.81    4.50
   4  -2   3   48.39    5.14
  -4   2  -3   39.19    5.15
   4   2   3   48.59    4.51
  -4   2  -3   44.93    4.50
  -5  -2  -3   66.69    6.01
  -5  -2  -3   74.42    6.03
  -5  -2  -3   61.15    6.17
   5  -2   3   66.89    6.98
  -5  -2  -3   64.02    7.05
   5   2   3   66.22    6.12
  -5   2  -3   62.14    7.06
  -5   2  -3   50.71    6.17
  -5   2  -3   55.86    6.00
  -5   2  -3   64.56    6.00
   6  -2   3    2.00    0.46
  -6  -2  -3    1.56    0.41
  -6  -2  -3    1.74    0.88
  -6  -2  -3    1.09    0.31
  -6   2  -3    1.82    0.32
   6   2   3    0.42    0.38
  -6   2  -3    2.69    1.13
  -7  -2  -3   30.74    3.21
  -7  -2  -3   31.35    3.35
  -7  -2  -3   32.80    4.07
  -7   2  -3   36.93    4.24
  -7   2  -3   34.31    3.21
  -7   2  -3   32.43    3.38
  -8  -2  -3    0.38    0.36
  -8   2  -3    0.27    0.46
  -8   2  -3   -0.30    0.34
  -8   2  -3   -0.12    0.36
 -10   3   3    4.46    0.68
  -9   3   3    1.03    0.35
  -9   3   3    0.58    0.28
  -8   3   3   13.42    1.39
  -8   3   3   12.12    1.10
  -8   3   3   12.51    1.30
  -8   3   3   11.29    1.37
  -7  -3   3    3.46    0.91
  -7  -3   3    2.96    0.43
  -7   3   3    2.66    0.42
  -7   3   3    1.68    0.77
  -7   3   3    2.96    0.50
  -6  -3   3    7.86    1.34
  -6  -3   3    7.43    1.10
   6  -3  -3    4.88    1.18
  -6   3   3    7.16    1.05
   6   3  -3    7.44    1.32
  -6   3   3    7.24    0.83
  -6   3   3    8.85    1.40
  -6   3   3    7.20    0.99
  -5  -3   3    2.53    0.77
   5  -3  -3    4.20    0.87
  -5  -3   3    3.24    0.54
  -5  -3   3    3.83    0.69
  -5   3   3    3.07    0.79
  -5   3   3    3.76    0.48
  -5   3   3    4.20    0.59
  -5   3   3    4.62    0.72
   5   3  -3    2.42    0.78
  -4  -3   3   13.39    1.39
  -4  -3   3   15.67    1.39
   4  -3  -3   13.95    1.54
  -4  -3   3   10.24    1.82
  -4   3   3    9.03    1.74
  -4   3   3   14.99    1.41
  -4   3   3   12.79    1.90
  -3  -3   3    3.52    0.47
   3  -3  -3    4.27    0.68
  -3  -3   3    3.81    0.52
  -3  -3   3    4.27    0.76
  -3  -3   3    2.08    0.79
   3  -3  -3    4.44    0.68
  -3   3   3    4.60    0.80
   3   3  -3    3.41    0.40
  -3   3   3    3.46    0.76
  -3   3   3    4.23    0.52
  -2  -3   3   24.71    2.64
  -2  -3   3   27.30    2.49
  -2  -3   3   28.64    2.59
  -2  -3   3   25.98    3.39
   2  -3  -3   28.37    2.60
  -2   3   3   26.98    2.60
  -2   3   3   23.24    3.08
   2   3  -3   26.75    2.43
  -1  -3   3   57.05    4.84
   1  -3  -3   48.08    4.66
  -1  -3   3   49.73    4.67
   1  -3  -3   45.06    4.50
  -1   3   3   54.74    4.83
   1   3  -3   50.05    4.54
   0  -3   3    2.20    0.33
   0  -3  -3    1.96    0.36
   0  -3  -3    1.24    0.29
   0  -3   3    2.07    0.46
   0   3  -3    1.55    0.30
   0   3   3    1.17    0.42
  -1  -3  -3   17.70    1.62
  -1  -3  -3   16.33    1.68
   1  -3   3   14.95    1.70
   1  -3   3   18.57    1.58
  -1   3  -3   15.65    1.70
   1   3   3   19.42    1.91
   2  -3   3   26.74    2.83
  -2  -3  -3   26.12    2.34
  -2  -3  -3   22.69    2.43
  -2  -3  -3   26.53    2.43
   2  -3   3   23.60    2.45
  -2  -3  -3   27.66    2.96
   2  -3   3   24.48    2.28
   2   3   3   26.58    2.54
  -2   3  -3   26.29    2.51
  -2   3  -3   23.98    2.84
  -3  -3  -3    2.52    0.37
  -3  -3  -3    2.79    0.70
  -3  -3  -3    2.31    0.54
   3  -3   3    2.50    0.38
   3  -3   3    3.01    0.46
  -3   3  -3    1.73    0.57
   3   3   3    2.36    0.43
  -3   3  -3    2.29    0.64
   4  -3   3   59.95    6.42
   4  -3   3   65.07    5.61
  -4  -3  -3   56.99    5.30
  -4  -3  -3   55.73    6.44
  -4  -3  -3   56.62    5.48
  -4   3  -3   55.54    5.55
  -4   3  -3   51.20    6.37
   4   3   3   63.14    5.63
  -4   3  -3   57.10    5.52
  -5  -3  -3    0.77    0.49
   5  -3   3    1.07    0.36
  -5  -3  -3    0.76    0.25
  -5  -3  -3    0.40    0.32
   5  -3   3    1.16    0.31
  -5  -3  -3    2.21    0.71
   5   3   3    1.23    0.38
  -5   3  -3    0.48    0.38
  -5   3  -3   -0.15    0.57
  -5   3  -3    1.34    0.69
  -5   3  -3    0.84    0.22
  -6  -3  -3    0.84    0.29
  -6  -3  -3    0.72    0.52
  -6  -3  -3    1.32    0.39
  -6  -3  -3    1.79    0.86
  -6   3  -3    1.45    0.29
  -6   3  -3    0.69    0.81
  -7  -3  -3    1.44    0.38
  -7  -3  -3    0.80    0.94
  -7   3  -3    0.96    0.35
  -7   3  -3    1.39    1.18
  -7   3  -3    0.56    0.38
  -8   3  -3    7.95    1.04
  -8   3  -3   10.18    1.14
  -8   3  -3    8.45    1.13
  -8   3  -3    8.06    0.82
  -9   3  -3   -0.58    0.35
  -9   3  -3    0.00    0.38
  -9   3  -3    0.49    0.46
 -10   4   3   15.62    1.75
  -9   4   3    8.64    1.09
  -9   4   3    7.35    0.93
  -9   4   3    9.43    1.07
  -8   4   3   15.36    1.51
  -8   4   3   14.00    1.20
  -8   4   3   11.21    1.38
  -8   4   3   12.54    1.47
  -7   4   3   24.46    2.57
  -7   4   3   27.32    2.61
  -7   4   3   28.55    3.37
   6  -4  -3    2.67    0.86
  -6  -4   3    2.43    0.64
  -6  -4   3    2.43    0.76
  -6   4   3    3.51    0.89
  -6   4   3    2.91    0.65
   6   4  -3    3.81    1.03
  -6   4   3    2.85    0.44
   5  -4  -3   53.81    5.07
  -5  -4   3   45.50    5.16
  -5  -4   3   44.30    5.95
  -5   4   3   56.52    4.99
  -5   4   3   55.62    6.02
  -5   4   3   55.90    5.09
   5   4  -3   55.88    5.12
  -5   4   3   50.44    5.16
  -4  -4   3  274.99   25.92
  -4  -4   3  238.11   30.94
  -4  -4   3  291.76   25.48
  -4  -4   3  314.21   26.77
   4  -4  -3  314.35   25.87
  -4   4   3  256.80   30.06
  -4   4   3  321.55   26.81
  -4   4   3  245.16   30.90
  -4   4   3  295.47   26.69
  -3  -4   3    3.05    0.71
   3  -4  -3    2.05    0.55
  -3  -4   3    2.87    0.42
  -3  -4   3    1.24    0.72
  -3  -4   3    2.69    0.36
   3  -4  -3    2.33    0.49
   3   4  -3    2.54    0.31
  -3   4   3    3.35    0.68
  -3   4   3    1.93    0.66
  -3   4   3    2.27    0.39
  -2  -4   3  277.55   29.99
  -2  -4   3  283.01   25.76
  -2  -4   3  292.25   24.89
   2  -4  -3  294.49   24.84
  -2  -4   3  256.70   24.49
   2   4  -3  267.24   24.45
  -2   4   3  255.11   25.78
  -1  -4   3    4.48    0.61
   1  -4  -3    3.09    0.58
  -1  -4   3    4.37    0.57
  -1   4   3    3.76    0.52
   1   4  -3    4.17    0.45
  -1   4   3    3.60    0.37
   0  -4  -3    8.97    0.98
   0  -4   3   10.18    0.97
   0  -4  -3    7.32    0.91
   0  -4   3   11.23    1.11
   0   4  -3    8.31    0.94
   0   4   3   10.92    1.17
  -1  -4  -3   13.60    1.46
   1  -4   3   16.18    1.38
  -1  -4  -3   14.23    1.42
   1  -4   3   13.75    1.47
   1   4   3   15.91    1.79
  -1   4  -3   13.89    1.54
  -2  -4  -3   12.59    1.39
  -2  -4  -3   13.38    1.50
  -2  -4  -3   14.54    1.76
   2  -4   3   13.05    1.22
  -2  -4  -3   14.56    1.31
   2  -4   3   14.31    1.57
   2  -4   3   11.90    1.33
   2   4   3   14.51    1.50
  -2   4  -3   12.82    1.47
  -2   4  -3   13.49    1.62
  -3  -4  -3    1.36    0.43
  -3  -4  -3    0.68    0.22
   3  -4   3    0.82    0.24
  -3  -4  -3    0.98    0.58
   3  -4   3    0.95    0.29
  -3  -4  -3    0.58    0.36
  -3   4  -3    0.71    0.43
   3   4   3    1.10    0.32
  -3   4  -3    0.90    0.57
  -4  -4  -3   42.33    3.76
  -4  -4  -3   39.13    4.62
  -4  -4  -3   43.27    3.94
   4  -4   3   46.55    3.98
  -4  -4  -3   35.20    4.01
   4  -4   3   43.41    4.56
  -4   4  -3   34.71    4.54
   4   4   3   43.95    4.00
  -4   4  -3   37.45    4.02
  -4   4  -3   40.37    3.89
  -5  -4  -3   13.60    1.66
   5  -4   3   13.98    1.68
  -5  -4  -3   16.51    2.08
   5  -4   3   13.44    1.46
  -5  -4  -3   12.29    1.47
  -5  -4  -3   13.88    1.39
   5   4   3   12.63    1.48
  -5   4  -3   13.57    1.96
  -5   4  -3   12.08    1.77
  -5   4  -3   12.66    1.64
  -5   4  -3   14.79    1.38
  -6  -4  -3   12.10    1.46
  -6  -4  -3   12.11    1.84
  -6  -4  -3   10.97    1.24
  -6   4  -3   10.16    1.14
  -6   4  -3   10.37    1.79
  -7  -4  -3    0.21    0.30
  -7  -4  -3   -1.08    0.79
  -7   4  -3    0.08    0.30
  -7   4  -3    0.01    0.94
  -7   4  -3    0.18    0.32
  -8   4  -3   16.50    1.61
  -8   4  -3   18.96    1.92
  -8   4  -3   18.53    1.90
  -8   4  -3   18.00    2.01
  -8   4  -3   19.28    1.94
  -9   4  -3   -0.11    0.45
  -9   4  -3   -0.48    0.38
  -9   4  -3   -0.18    0.38
 -10   5   3    3.91    0.59
 -10   5   3    2.40    0.44
  -9   5   3    5.17    0.84
  -9   5   3    6.48    0.77
  -9   5   3    6.60    0.83
  -8   5   3    7.13    0.85
  -8   5   3    7.41    0.92
  -8   5   3    7.26    0.69
  -8   5   3    7.31    0.96
  -7  -5   3    4.41    0.85
  -7   5   3    2.83    0.93
  -7   5   3    4.70    0.62
  -7   5   3    3.09    0.49
  -6  -5   3   13.97    1.87
  -6  -5   3   17.14    2.25
  -6   5   3   19.13    1.89
   6   5  -3   13.93    2.08
  -6   5   3   17.60    2.27
  -6   5   3   16.65    1.69
  -5  -5   3   -0.50    0.32
   5  -5  -3    0.36    0.52
  -5  -5   3    0.09    0.43
  -5  -5   3   -0.08    0.35
  -5   5   3   -0.03    0.46
  -5   5   3    0.50    0.37
  -5   5   3    0.34    0.26
  -5   5   3    0.41    0.19
   4  -5  -3   49.50    4.85
  -4  -5   3   59.33    4.88
  -4  -5   3   41.15    5.80
  -4  -5   3   40.47    5.00
  -4  -5   3   54.51    4.70
  -4  -5   3   46.62    4.93
  -4   5   3   55.73    4.83
  -4   5   3   47.07    5.73
  -4   5   3   56.00    4.92
  -4   5   3   47.72    5.77
  -3  -5   3    5.38    0.57
  -3  -5   3    4.52    0.86
   3  -5  -3    5.25    0.80
  -3  -5   3    3.61    1.05
  -3  -5   3    5.29    0.64
  -3   5   3    3.83    0.91
  -3   5   3    5.29    0.89
   3   5  -3    4.73    0.53
  -3   5   3    5.75    0.62
   2  -5  -3   52.53    4.60
  -2  -5   3   51.72    4.62
  -2  -5   3   48.20    4.43
  -2  -5   3   56.80    4.65
  -2  -5   3   49.00    5.81
  -2   5   3   43.13    5.41
  -2   5   3   41.00    5.24
   2   5  -3   48.56    4.39
  -2   5   3   49.67    4.66
  -1  -5   3    2.55    0.50
  -1  -5   3    2.76    0.43
   1  -5  -3    2.41    0.48
  -1  -5   3    1.28    0.80
  -1  -5   3    2.06    0.35
  -1   5   3    1.63    0.35
   1   5  -3    1.94    0.30
  -1   5   3    2.06    0.24
   0  -5   3    3.93    0.47
   0  -5  -3    2.85    0.47
   0  -5   3    2.72    0.52
   0  -5  -3    2.68    0.39
   0   5   3    2.90    0.59
   0   5  -3    2.97    0.48
   1  -5   3    2.90    0.41
  -1  -5  -3    1.89    0.43
   1  -5   3    3.09    0.56
  -1  -5  -3    4.26    0.47
  -1  -5  -3    2.87    0.43
   1  -5   3    3.18    0.35
   1   5   3    3.50    0.77
  -1   5  -3    3.00    0.54
   1   5   3    1.62    0.65
   2  -5   3  114.98   11.85
  -2  -5  -3  120.27   10.00
  -2  -5  -3  131.43   11.73
   2  -5   3  104.63    9.81
   2  -5   3   97.40   10.27
  -2  -5  -3  112.81    9.79
  -2  -5  -3  101.51    9.85
   2   5   3  102.08   10.41
  -2   5  -3  106.31    9.92
  -2   5  -3  106.17   11.56
  -3  -5  -3   23.84    2.46
  -3  -5  -3   22.16    2.54
   3  -5   3   26.32    2.84
   3  -5   3   26.97    2.45
  -3  -5  -3   24.62    2.95
  -3  -5  -3   23.21    2.32
  -3   5  -3   22.95    2.85
   3   5   3   27.05    2.53
  -3   5  -3   25.77    2.60
   4  -5   3   15.19    1.44
  -4  -5  -3   11.72    1.45
  -4  -5  -3   14.88    1.38
   4  -5   3   15.84    1.67
  -4  -5  -3   14.52    1.56
  -4  -5  -3   12.46    1.87
   4   5   3   14.90    1.50
  -4   5  -3    9.71    1.68
  -4   5  -3   13.21    1.36
  -4   5  -3   11.87    1.76
  -5  -5  -3    0.55    0.61
   5  -5   3    0.29    0.30
  -5  -5  -3    0.21    0.42
   5  -5   3    0.66    0.27
  -5  -5  -3    0.20    0.25
   5   5   3    2.05    0.46
  -5   5  -3    0.94    0.60
  -5   5  -3   -0.02    0.68
  -5   5  -3    0.28    0.18
   6  -5   3    0.25    0.34
  -6  -5  -3    0.30    0.28
  -6  -5  -3    1.21    0.74
  -6  -5  -3    1.18    0.49
  -6   5  -3   -0.30    0.18
  -6   5  -3   -0.28    0.58
  -6   5  -3   -0.03    0.18
  -7  -5  -3   17.59    2.02
  -7  -5  -3   19.83    2.76
  -7   5  -3   17.83    2.81
  -7   5  -3   20.43    1.96
  -7   5  -3   19.36    2.06
  -8   5  -3   14.60    1.52
  -8   5  -3   10.29    1.15
  -8   5  -3   13.75    1.41
  -8   5  -3   13.12    1.44
  -8   5  -3   14.90    1.43
  -9   5  -3    2.74    0.65
  -9   5  -3    2.45    0.57
  -9   5  -3    3.30    0.64
  -9   5  -3    3.81    0.57
 -10   6   3    0.79    0.41
 -10   6   3    0.41    0.28
  -9   6   3    6.74    0.93
  -9   6   3    6.05    0.77
  -9   6   3    6.43    0.83
  -8   6   3   34.31    3.55
  -8   6   3   37.43    3.15
  -8   6   3   33.56    3.49
  -8   6   3   37.32    3.68
  -7  -6   3   -0.17    0.52
  -7   6   3    1.08    0.72
  -7   6   3    0.08    0.21
  -7   6   3   -0.10    0.29
  -6  -6   3   -0.30    0.41
  -6  -6   3    0.06    0.50
  -6   6   3    0.51    0.23
  -6   6   3   -0.12    0.49
  -6   6   3    0.17    0.19
  -5  -6   3    1.87    0.54
   5  -6  -3    1.70    0.63
  -5  -6   3    1.84    0.46
  -5  -6   3    1.67    0.67
  -5  -6   3    2.23    0.74
  -5   6   3    2.14    0.34
  -5   6   3    1.93    0.44
  -5   6   3    2.15    0.51
  -5   6   3    2.02    0.67
  -4  -6   3    1.63    0.66
  -4  -6   3    2.27    0.56
  -4  -6   3    2.77    0.79
   4  -6  -3    2.80    0.63
  -4  -6   3    2.20    0.45
  -4   6   3    2.48    0.67
  -4   6   3    1.93    0.86
  -4   6   3    2.57    0.43
   4   6  -3    2.84    0.36
  -4   6   3    1.75    0.45
  -4   6   3    2.51    0.35
   3  -6  -3    1.05    0.53
  -3  -6   3    0.77    0.21
  -3  -6   3    0.74    0.47
  -3  -6   3    1.21    0.32
  -3  -6   3    0.97    0.74
   3   6  -3    2.68    0.28
  -3   6   3    1.07    0.29
  -3   6   3    1.26    0.57
  -3   6   3    1.08    0.45
  -2  -6   3    1.39    0.97
  -2  -6   3    1.68    0.48
  -2  -6   3    0.97    0.24
  -2  -6   3    1.06    0.20
   2  -6  -3    1.07    0.42
   2   6  -3    1.13    0.20
  -2   6   3    0.45    0.33
  -2   6   3    1.22    0.27
  -2   6   3    1.15    0.45
  -1  -6   3   11.21    1.16
   1  -6  -3    9.46    1.13
  -1  -6   3   10.18    1.11
  -1  -6   3   10.07    1.02
  -1  -6   3   11.60    1.76
  -1   6   3   10.23    0.95
   1   6  -3   10.68    1.01
  -1   6   3   10.02    1.33
  -1   6   3    8.85    1.06
   0  -6   3    4.34    0.63
   0  -6  -3    3.46    0.48
   0  -6   3    4.71    0.55
   0  -6  -3    3.43    0.57
   0  -6   3    4.51    0.87
   0   6   3    4.88    0.88
   0   6  -3    4.78    0.59
   0   6   3    3.68    0.67
  -1  -6  -3    9.55    1.04
   1  -6   3    9.93    1.02
   1  -6   3   11.00    1.29
   1  -6   3   10.01    0.96
  -1  -6  -3    9.44    1.04
  -1  -6  -3   11.41    1.03
   1   6   3    8.10    1.22
   1   6   3    8.75    1.35
  -1   6  -3    8.99    1.06
  -2  -6  -3  196.04   16.72
  -2  -6  -3  206.84   16.99
   2  -6   3  207.78   20.25
   2  -6   3  180.80   16.82
   2  -6   3  171.21   17.57
  -2  -6  -3  168.37   16.77
  -2   6  -3  194.61   19.72
  -2   6  -3  189.36   16.86
   2   6   3  167.95   17.74
  -3  -6  -3   18.50    2.16
   3  -6   3   22.40    2.16
  -3  -6  -3   22.02    2.07
  -3  -6  -3   19.76    2.66
   3  -6   3   22.80    2.53
  -3  -6  -3   19.38    2.33
   3   6   3   22.78    2.27
  -3   6  -3   24.29    2.38
  -3   6  -3   24.55    2.61
   4  -6   3  192.98   17.21
  -4  -6  -3  152.86   17.39
   4  -6   3  204.84   19.81
  -4  -6  -3  179.75   16.47
  -4  -6  -3  186.15   19.39
  -4  -6  -3  178.71   16.35
  -4   6  -3  203.24   17.12
  -4   6  -3  169.25   19.33
  -4   6  -3  163.37   16.62
   4   6   3  185.64   17.27
  -5  -6  -3   16.24    1.92
  -5  -6  -3   18.79    1.98
  -5  -6  -3   21.97    2.45
   5  -6   3   18.93    1.92
  -5  -6  -3   17.78    1.83
   5  -6   3   20.03    2.24
  -5   6  -3   19.08    2.38
  -5   6  -3   18.54    1.84
  -6  -6  -3    0.91    0.32
   6  -6   3    0.89    0.42
  -6  -6  -3    1.35    0.77
  -6   6  -3    0.71    0.25
  -6   6  -3    0.49    0.25
  -6   6  -3    0.27    0.62
  -7   6  -3    6.36    0.89
  -7   6  -3    6.42    1.56
  -7   6  -3    7.33    0.88
  -8   6  -3    4.33    0.71
  -8   6  -3    4.01    0.47
  -8   6  -3    4.49    0.73
  -8   6  -3    4.78    0.63
  -8   6  -3    5.26    0.73
  -9   6  -3   10.41    1.26
  -9   6  -3   10.92    1.30
  -9   6  -3   11.20    1.27
  -9   6  -3    9.04    1.20
 -10   7   3    0.54    0.40
 -10   7   3    0.06    0.27
  -9   7   3    1.60    0.41
  -9   7   3    0.90    0.32
  -9   7   3    0.55    0.40
  -8   7   3   16.05    1.42
  -8   7   3   16.58    1.73
  -8   7   3   15.65    1.63
  -8   7   3   14.44    1.69
  -7  -7   3   27.40    3.43
  -7   7   3   31.89    3.20
  -7   7   3   37.80    3.26
   6  -7  -3   10.21    1.23
  -6  -7   3   11.10    1.64
  -6  -7   3    8.26    1.27
  -6   7   3    9.50    1.03
  -6   7   3    9.22    1.01
  -6   7   3    8.76    1.57
  -5  -7   3   17.52    2.36
   5  -7  -3   20.59    2.37
  -5  -7   3   27.92    2.25
  -5  -7   3   18.51    2.55
  -5  -7   3   23.77    2.84
  -5   7   3   22.49    3.30
  -5   7   3   26.88    2.87
  -5   7   3   20.40    2.27
  -5   7   3   22.63    2.19
   4  -7  -3   44.04    4.49
  -4  -7   3   40.35    4.63
  -4  -7   3   45.58    4.59
  -4  -7   3   43.09    5.46
  -4  -7   3   49.01    4.33
  -4   7   3   49.60    5.37
  -4   7   3   41.75    4.59
   4   7  -3   50.91    4.26
  -4   7   3   53.94    4.56
  -4   7   3   37.07    5.33
  -4   7   3   51.15    4.46
  -3  -7   3    0.89    0.90
  -3  -7   3    2.17    0.58
   3  -7  -3    1.79    0.51
  -3  -7   3    1.22    0.31
  -3   7   3    1.67    0.32
  -3   7   3    1.18    0.57
   3   7  -3    1.56    0.26
  -3   7   3    1.31    0.48
  -2  -7   3    0.23    0.13
  -2  -7   3    1.06    0.87
   2  -7  -3    0.08    0.33
  -2  -7   3    0.26    0.38
  -2  -7   3    0.09    0.18
  -2   7   3    0.28    0.18
  -2   7   3    0.78    0.41
   2   7  -3    0.54    0.17
  -2   7   3    0.29    0.32
  -1  -7   3    7.39    0.82
  -1  -7   3    6.19    0.88
  -1  -7   3    8.33    1.46
   1  -7  -3    6.76    0.88
  -1  -7   3    6.45    0.76
   1   7  -3    6.78    0.74
  -1   7   3    6.11    0.78
  -1   7   3    9.10    1.08
  -1   7   3    8.26    0.71
   0  -7  -3    0.41    0.30
   0  -7  -3    0.38    0.26
   0  -7   3    0.23    0.55
   0  -7   3    0.95    0.26
   0  -7   3    0.57    0.36
   0   7   3    1.22    0.64
   0   7  -3    0.76    0.30
   0   7   3    0.85    0.34
   1  -7   3  246.43   24.44
   1  -7   3  232.01   20.31
   1  -7   3  209.15   21.18
  -1  -7  -3  192.93   20.15
  -1  -7  -3  239.64   20.38
  -1   7  -3  232.24   23.67
  -1   7  -3  206.60   20.17
   1   7   3  248.56   23.77
  -2  -7  -3    0.62    0.22
  -2  -7  -3    0.26    0.29
  -2  -7  -3   -0.06    0.35
   2  -7   3    0.67    0.30
   2  -7   3    0.62    0.15
   2  -7   3    0.46    0.17
  -2   7  -3    1.37    0.46
   2   7   3    1.20    0.63
  -2   7  -3    1.54    0.52
   2   7   3    0.69    0.58
  -3  -7  -3  203.68   20.92
   3  -7   3  238.84   21.60
  -3  -7  -3  221.46   20.52
  -3  -7  -3  245.80   24.32
   3  -7   3  251.23   24.87
  -3  -7  -3  201.08   20.59
  -3   7  -3  254.06   20.79
  -3   7  -3  233.51   24.23
   3   7   3  217.77   21.72
  -4  -7  -3   14.69    1.93
   4  -7   3   20.98    2.28
  -4  -7  -3   18.17    2.41
  -4  -7  -3   19.45    1.86
  -4  -7  -3   18.78    1.98
   4  -7   3   21.13    1.94
  -4   7  -3   20.11    2.37
  -4   7  -3   20.70    1.87
  -4   7  -3   17.94    2.35
  -5  -7  -3   19.57    2.23
  -5  -7  -3   24.43    2.81
  -5  -7  -3   21.38    2.26
  -5  -7  -3   20.34    2.13
   5  -7   3   22.36    2.23
   5  -7   3   25.80    2.63
  -5   7  -3   21.78    2.15
  -5   7  -3   22.50    2.73
   6  -7   3    1.00    0.49
  -6  -7  -3    0.69    0.80
  -6  -7  -3    1.44    0.38
  -6   7  -3    0.97    0.27
  -6   7  -3    0.95    0.29
  -6   7  -3    1.55    0.79
  -7  -7  -3   -0.26    0.30
  -7   7  -3    0.54    0.31
  -7   7  -3    0.37    0.28
  -7   7  -3   -0.90    0.74
  -8   7  -3    4.14    0.66
  -8   7  -3    4.85    0.68
  -8   7  -3    4.51    0.61
  -8   7  -3    3.83    0.46
  -8   7  -3    4.22    0.66
  -9   7  -3   -0.09    0.40
  -9   7  -3   -0.03    0.32
  -9   7  -3    0.16    0.38
 -10   7  -3    1.41    0.45
 -10   7  -3    1.09    0.49
[truncated: 1,437,272 more chars]
